# Supplementary material for: Integrated EVLP and single-cell profiling uncovers aberrant activation of tissue-resident lymphocytes and pro-fibrotic GZMK⁺ CD8 T cells in IPF
Source: Research Square preprint supplement (doi:10.21203/rs.3.rs-7500111/v1), 2025-09-08
Supplement: Supplementary file 1 [file 8c8bbe669c034970aab0702e.xlsx]

## Sheet: table S1 Human lung info
table S1. Human lung information (scRNA-seq)
ID	Age (year)	Sex
Control lung donor
D1	51	M
D2	57	M
D3	43	M
D4	53	M
D5	55	M
IPF patients
F1	64	M
F2	68	M
F3	65	M
F4	58	M
F5	52	M
F6	54	M
F7	52	F

## Sheet: table S2 GZMK+ vs GZMK- CD8 T 
table S2. Differentially expressed genes in GZMK+ vs. GZMK- CD8 T cells
Gene	Avg_log2FC	Adjusted_pValue
GZMK	2.07873	0
CCL4L2	1.63053	0
DNAJB1	1.54974	0
HSPA1A	1.50382	0
HLA-DQA1	1.33072	0
CMC1	1.32155	0
NKG7	1.26283	0
CCL3L1	1.2452	0
HLA-DRB1	1.24197	0
HLA-DRA	1.17495	0
CST7	1.16841	0
CD74	1.11133	0
GZMA	1.10546	0
TNFRSF9	1.06286	0
HLA-DQB1	0.993909	0
GZMH	0.992158	0
HLA-DPB1	0.988723	0
LYST	0.97537	0
HLA-DRB5	0.942816	0
HLA-DPA1	0.92497	0
CRTAM	0.889735	0
SH2D1A	0.868161	0
ENC1	0.747668	0
CCL5	0.629795	0
ZFP36L2	-0.590158	0
TSC22D3	-0.681262	0
SAMSN1	-0.717049	0
CEBPB	-0.927775	0
ANKRD28	-0.960687	0
TXNIP	-0.969219	0
CD55	-0.996296	0
SMIM3	-1.06044	0
KLRC1	-1.18016	0
SPRY1	-1.35028	0
TOB1	-1.3746	0
AREG	-1.54069	0
IL7R	-1.58534	0
TNFAIP3	-0.650034	4.52222e-292
COTL1	0.713344	3.22393e-265
ZBTB16	-0.684644	1.54481e-264
KLRG1	0.650585	5.02633e-263
HSP90AA1	1.02411	2.40761e-261
CD226	-0.661593	5.87359e-256
DTHD1	0.680149	5.07184e-251
CTSC	0.70186	5.28686e-248
ITGB2	0.680915	1.3346e-243
KLF6	-0.506133	1.14891e-234
ITGA1	-0.696941	6.11461e-233
HSPA6	2.17847	3.50806e-226
VIM	-0.503817	1.09514e-224
SNX9	-0.644642	2.11698e-223
OAZ1	0.455928	2.05111e-220
PLEK	0.53479	4.44988e-217
FKBP11	-0.638724	1.99171e-216
ZFP36	-0.453485	8.33367e-212
HSPD1	0.756415	1.18416e-210
NFKBIA	-0.595789	1.53241e-206
XCL1	-1.33391	5.53152e-206
CRYBG1	-0.585966	1.32267e-205
TPT1	-0.317879	2.53578e-202
IL2RA	-0.597925	2.79756e-197
GLUL	-0.683229	4.28529e-197
LINC01871	-0.59844	1.38697e-196
PHLDA1	-0.718805	2.63962e-196
TRAT1	0.579404	3.19646e-196
TNFSF9	0.921596	5.15173e-193
PGK1	-0.543667	1.55498e-192
SAP30	-0.764308	1.7957e-192
HNRNPLL	0.646997	2.10152e-192
GPR171	-0.647395	1.93857e-184
STARD7	0.638819	7.44907e-182
HLA-DMA	0.509593	2.11689e-181
HSPH1	0.932741	8.65011e-179
HSPA8	0.639774	2.33759e-175
TIGIT	0.565651	5.54343e-175
VCAM1	0.574003	2.0037e-174
APMAP	0.546977	1.27673e-170
TMSB10	-0.460605	1.67514e-170
SEC14L1	-0.553256	1.93445e-170
PTGER4	-0.51544	7.29415e-165
NR3C1	-0.548134	7.54468e-163
BIRC3	-0.62628	3.57188e-162
SRSF7	0.46972	1.07646e-159
FOS	-0.503171	1.39901e-159
TNIP3	0.473376	7.39681e-158
TMEM173	-0.564915	6.71004e-157
RBMS1	-0.546466	7.63425e-153
MAML3	-0.36778	2.659e-148
PYHIN1	0.461248	8.14888e-148
RORA	-0.542254	1.37524e-147
UGP2	-0.539875	2.71859e-146
DUSP4	0.601502	1.50474e-143
HLA-DQA2	0.551816	2.55973e-143
KIF5C	-0.435528	3.59778e-142
PTP4A2	0.453148	2.82927e-141
PTPN1	-0.51398	2.68538e-138
SYNE1	0.458044	6.23233e-137
RBPJ	-0.606873	1.04885e-136
PTGER2	-0.52561	1.92973e-136
KLRB1	-0.747029	2.53942e-136
PMAIP1	0.573753	1.16741e-135
RPS27A	-0.216375	2.56617e-135
MIR4435-2HG	0.428594	4.07824e-135
GZMM	0.496179	2.40042e-134
SOCS1	-0.545405	2.19174e-132
HSPE1	0.588904	2.8986e-132
PLAAT4	0.511018	2.31053e-131
CHD7	-0.451701	3.15913e-131
KLRD1	-0.478137	1.41836e-129
IL18RAP	-0.397826	8.30095e-129
FTH1	-0.464051	1.09726e-128
FKBP5	-0.449395	6.04407e-127
BICDL1	0.514579	2.59404e-126
ADAM19	-0.464695	4.38387e-125
CEMIP2	0.494849	2.20727e-122
CITED2	-0.561232	2.54311e-122
MT2A	-0.981864	1.65227e-121
LDLRAD4	-0.540865	2.1813e-117
HPGD	-0.497147	1.60417e-116
MCOLN2	0.494804	7.747e-116
MYC	-0.565294	4.69214e-115
CD7	-0.315514	2.33563e-114
CCL3	0.664348	9.6486e-114
PIK3R1	0.392942	1.12551e-113
RPL32	-0.216505	7.62945e-113
CELF2	-0.439424	1.62686e-112
WNK1	0.423335	8.56772e-111
GZMB	-0.534295	1.08522e-109
IL18R1	-0.412918	7.47947e-109
DOCK10	-0.445024	7.56132e-109
RASGRP1	0.437165	1.26693e-108
HLA-E	0.282392	1.64872e-107
DUSP2	0.350809	5.24122e-106
JUND	-0.356829	1.0788e-105
PABPC1	-0.302264	1.29684e-105
ZNF331	0.483936	6.18756e-105
ZFAND2A	0.765956	2.14286e-104
RNF213	0.421978	1.24898e-101
EEF1B2	-0.270079	5.09321e-101
GRASP	-0.413478	1.08088e-100
GBP5	0.462943	3.17205e-100
LMNB1	0.406406	5.01299e-100
CH25H	-0.76947	1.07576e-99
PDE4D	-0.423552	5.11946e-99
HSPB1	0.782526	8.62592e-98
CNN2	0.431787	2.13654e-97
RPS13	-0.224552	6.99758e-96
BRD9	-0.43349	6.03743e-95
GIMAP4	0.415376	1.39498e-94
BTG1	-0.265844	2.0239e-94
GALM	0.420782	3.95604e-94
XBP1	-0.401608	4.20253e-94
OASL	0.490797	4.56715e-94
ARID5B	0.393352	1.29562e-93
ATP1B1	-0.409487	6.55913e-93
MAF	0.510745	5.18786e-92
PHLDA2	-0.465681	5.72396e-92
MT-ND2	-0.408506	6.54592e-92
PIM2	-0.415872	1.7146e-91
ATP1B3	0.436896	1.85952e-91
ID2	-0.442031	2.16797e-90
GIMAP7	0.379898	3.00512e-90
FURIN	-0.31681	1.11122e-89
CD96	-0.395394	1.25462e-89
SYTL2	-0.449393	2.73118e-89
CD9	-0.290095	4.24041e-89
NDFIP1	-0.407334	4.71777e-89
TERF2IP	0.361282	1.70557e-88
NBL1	-0.311857	2.10079e-88
TMSB4X	0.203017	3.30021e-88
C1orf21	0.289615	5.59432e-88
CD27	0.386032	6.13158e-88
PFN1	0.346254	1.43924e-87
CD28	0.389373	1.72182e-87
ARHGAP25	0.340973	1.53262e-86
SLAMF1	-0.403456	4.59225e-86
RPS4X	-0.204548	2.87043e-85
PHACTR2	0.337623	3.31718e-84
LINC02195	-0.531101	3.99856e-84
RGCC	-0.490126	7.28685e-84
BACH2	-0.496418	3.97025e-83
GAPDH	0.346803	6.45918e-83
HLA-B	0.200251	7.65171e-83
CARD16	0.371038	4.74602e-82
STAT5B	0.38186	1.88384e-81
GGA2	0.372229	8.01934e-80
S100A4	-0.372531	2.65725e-79
TIPARP	-0.369733	3.55619e-79
PPP1CB	-0.349563	4.42934e-79
PFKFB3	-0.41151	7.3138e-79
CACYBP	0.444405	4.08354e-78
ISG20	0.333954	5.3025e-78
RPL34	-0.18276	9.64355e-78
HNRNPUL1	-0.361201	2.55397e-77
CAPG	-0.365746	5.7963e-77
ATXN1	0.376528	6.06953e-77
C12orf75	0.338841	7.30689e-77
PELO	-0.373451	5.87348e-76
SAMD3	0.357572	3.21976e-75
S100A6	-0.300582	1.39557e-74
TOX	0.344321	5.35398e-74
HLA-A	0.190131	5.49735e-74
FOSL2	-0.365131	5.98745e-74
BAG3	0.859854	1.90377e-73
ITM2A	0.395228	2.98352e-73
LIME1	0.375688	4.82503e-73
MT-CO2	-0.352018	5.26006e-73
TRPC4AP	0.347549	1.21144e-72
PLAC8	-0.313738	6.84616e-72
RPLP1	-0.16625	8.68326e-72
MGAT4A	-0.368153	1.96648e-71
CYTOR	0.250311	2.16072e-71
APOBEC3G	0.367032	5.6978e-71
ITM2C	-0.373163	1.38025e-70
RPS3A	-0.19512	2.04043e-70
LGALS3	-0.385703	5.68745e-70
SH3KBP1	0.34925	7.87528e-70
TERF1	0.344191	2.86445e-69
PRKCQ-AS1	-0.373575	3.09642e-69
GADD45G	-0.399217	7.11289e-69
ARHGDIB	0.280593	7.33921e-69
ITGAL	0.280734	7.90315e-69
NAA50	0.338937	1.15534e-68
CHORDC1	0.4065	1.25851e-68
ABHD17A	0.339117	3.682e-68
OPTN	0.329776	4.49764e-68
ARHGEF7	-0.366084	1.11776e-67
PCNX1	-0.368109	2.38653e-67
GLO1	-0.339984	1.16522e-65
STAT5A	0.360492	1.06521e-64
ETS2	-0.328345	1.41025e-64
LINC02446	-0.447721	5.5944e-64
NFATC2	0.356844	5.60408e-64
CCL20	-0.995789	1.12204e-63
MOB4	0.43263	1.22081e-63
JPT1	0.307964	4.03689e-63
PIK3IP1	-0.331118	4.47591e-63
TMEM123	-0.329769	5.35078e-63
UBB	0.335833	1.98178e-62
GPR65	-0.331598	3.94536e-62
NEU1	0.378739	4.64151e-62
NELFCD	0.293405	1.59942e-61
DOK2	0.3533	2.04595e-61
PTTG1	0.327121	2.13956e-61
YWHAB	0.296	7.82231e-61
DNAJA4	0.425938	1.43739e-60
SLAMF7	0.322586	2.63562e-60
ARL6IP1	0.312457	1.78499e-59
NEK7	0.340936	2.50947e-59
IKZF2	0.331344	1.41049e-58
LRMP	0.271158	1.56495e-58
MT1X	-0.923306	2.42767e-58
PRKCH	0.375775	1.32079e-57
HCST	0.318215	1.95729e-57
GBP2	0.320692	6.10898e-57
TRBC1	0.417209	1.07461e-56
RUNX2	-0.31031	1.25825e-56
FYB1	0.300489	7.28266e-56
AC243829.1	0.245172	8.92086e-56
SLBP	0.298548	1.51081e-55
HOPX	-0.367234	1.79114e-55
CD5	0.330597	4.10946e-55
CD69	-0.380904	4.21046e-55
CALM3	0.306703	5.19155e-55
GBP4	0.282513	5.52048e-55
PMEPA1	-0.257177	1.1178e-54
F2R	0.28377	1.19782e-54
FAM53B	0.239696	1.4521e-54
IDH2	0.29935	1.47446e-54
KLRC2	-0.319395	2.02897e-54
PIP4K2A	0.298054	2.51639e-54
IFITM2	-0.204955	3.31236e-54
PRDM1	-0.290488	7.02498e-54
IGHG1	0.365917	9.87129e-54
TECR	0.354857	1.16182e-53
ARPC5L	0.302395	2.93845e-53
GABARAPL1	-0.276572	3.14054e-53
TNFRSF18	-0.270301	3.81029e-53
DNAJA1	0.343948	1.03482e-52
TC2N	0.306521	1.90935e-52
LMNA	-0.333563	4.8538e-52
DNAJB4	0.363674	5.40287e-52
PPP1R3B	-0.251851	6.39373e-52
PCED1B-AS1	0.283957	1.08291e-51
TRG-AS1	0.279285	1.90379e-51
AC020916.1	-0.35529	2.55318e-51
HSP90AB1	0.365942	4.81215e-51
CD53	-0.255787	4.83695e-51
RPS5	-0.185489	5.56483e-51
STK17B	-0.233772	3.35307e-50
RPL9	-0.187208	4.21621e-50
SYTL3	-0.243716	5.22791e-50
GXYLT1	0.23728	7.56777e-50
ODF2L	-0.297199	8.12967e-50
IGHG3	0.262913	1.38531e-49
AFDN	-0.22188	1.79745e-49
NOP58	0.29608	3.07185e-49
PRKCA	-0.238837	3.16246e-49
LSR	-0.269476	3.6714e-49
FLNA	0.297678	4.21832e-49
ANKRD9	-0.251149	6.15785e-49
PTPRJ	0.271799	1.76151e-48
TRGC2	0.331469	1.77952e-48
ANXA5	0.303988	2.5145e-48
DYNC1H1	0.320718	3.60623e-48
RPL22	-0.189292	3.85486e-48
LITAF	0.253967	4.16434e-48
SERINC5	-0.283536	4.20953e-48
IFNG	0.135695	6.07173e-48
PARP8	-0.279986	6.41263e-48
PERP	-0.299384	8.89588e-48
RPL28	0.117955	1.21964e-47
ARL6IP5	0.275446	5.01732e-47
SYNJ2	-0.242746	5.65453e-47
HSPA5	-0.271921	7.89103e-47
RABGAP1L	0.32062	8.2013e-47
DEDD2	0.287932	8.56945e-47
NINJ1	-0.351115	1.0554e-46
NIN	0.2769	2.38857e-46
SC5D	-0.307179	3.8633e-46
SPATS2L	0.270119	4.08273e-46
TNF	0.424985	7.11944e-46
MT-ND3	-0.305761	8.79231e-46
SLC7A5	-0.267158	1.16466e-45
ZNF250	-0.235239	1.6278e-45
IGLC2	0.386541	1.6458e-45
CYTIP	-0.183856	3.32448e-45
CASP1	0.211828	4.61955e-45
SATB1	-0.296168	4.95799e-45
SMC4	0.281532	5.74911e-45
CDK6	0.242517	1.01622e-44
NSD3	0.276552	1.12721e-44
GNLY	-0.547244	1.2156e-44
NLRC5	0.284134	1.62426e-44
TARSL2	-0.290379	1.65897e-44
CPD	-0.302661	1.66481e-44
AKNA	0.243809	2.51215e-44
RPLP0	-0.179817	3.61493e-44
RPS15A	0.134604	7.7625e-44
G3BP2	-0.273543	1.11657e-43
ISG15	0.302348	1.78087e-43
HERC5	-0.279383	2.47946e-43
FABP5	0.281902	2.6753e-43
PSME1	0.245925	2.86396e-43
ACOT9	0.257678	5.81497e-43
C5orf56	0.263001	8.53659e-43
HLA-C	0.160808	9.70577e-43
CD81	0.276112	1.52167e-42
TUBA4A	0.28956	1.52964e-42
NUSAP1	0.230484	2.48006e-42
BATF	-0.330554	3.6552e-42
N4BP2	-0.261611	3.71549e-42
RPS23	-0.141171	3.96579e-42
LCP1	0.214426	3.99353e-42
S100A11	-0.290022	4.42204e-42
DNAJB9	-0.283678	5.5922e-42
NAB1	0.220091	8.8076e-42
PRKACB	0.240067	2.27908e-41
ABI3	0.239651	4.85814e-41
FAM110A	0.235626	4.91915e-41
FAM160B1	0.212331	5.26238e-41
JAML	-0.27481	8.56147e-41
IL6ST	-0.303541	9.37682e-41
CAP1	0.278961	9.42593e-41
BCL11B	0.28751	1.65973e-40
TIMP1	-0.258597	1.93213e-40
HERPUD2	0.286514	2.4207e-40
PTPRCAP	0.385193	3.84101e-40
IQGAP1	-0.251348	4.93436e-40
PARK7	0.26624	5.25664e-40
KDM6B	-0.341051	7.82006e-40
CTSW	0.286459	9.68638e-40
ESYT2	-0.29582	1.36953e-39
DR1	0.248302	5.44063e-39
CHD3	0.242785	1.06018e-38
CORO1A	0.297511	1.08825e-38
TNFRSF14	0.214534	1.77827e-38
FOXP1	-0.274514	3.72891e-38
JMY	-0.295319	3.76215e-38
IFITM3	-0.246178	6.4165e-38
CD70	0.186263	9.35569e-38
OXNAD1	-0.277224	1.16256e-37
ITM2B	-0.219268	2.90006e-37
IGKC	0.39291	4.50927e-37
XYLT1	-0.220535	8.33887e-37
PER1	-0.271156	1.56413e-36
SFTPC	-0.272984	3.20746e-36
LIMA1	0.210403	3.20965e-36
ZBTB38	0.230345	3.60974e-36
SARAF	-0.160448	1.06063e-35
GBP1	0.188117	1.40202e-35
PSMB9	0.252636	1.96875e-35
RPS21	-0.115345	2.2779e-35
PDE7A	0.26658	2.69359e-35
ANXA1	-0.235338	2.99094e-35
SIK3	0.304263	3.61365e-35
NR4A2	0.284468	3.63332e-35
DSE	-0.222067	4.28635e-35
LPIN1	-0.277522	4.54888e-35
DENND2D	0.208688	5.77801e-35
2024-03-03	0.215829	6.92209e-35
IGLC1	0.359701	9.86419e-35
TENT4B	0.228017	1.32471e-34
IER5L	0.332276	4.28672e-34
RPL8	-0.128691	4.74888e-34
BLMH	-0.219356	4.79807e-34
MT-ND4	-0.31229	5.35424e-34
RPS3	-0.112943	5.66828e-34
ATP5F1E	0.172706	7.25595e-34
ST3GAL1	-0.240734	1.15423e-33
IRF1	0.249555	1.5183e-33
UTRN	0.253793	1.58967e-33
SKI	-0.257324	3.66194e-33
WAKMAR2	-0.254729	4.686e-33
APBA2	-0.224381	5.74843e-33
LBR	0.224969	8.67105e-33
RPL11	-0.136914	1.4376e-32
MAFF	-0.271647	2.17803e-32
ABHD3	0.284879	2.96999e-32
EXOSC9	0.198624	3.22377e-32
PPP2R5C	0.203524	5.54003e-32
FKBP4	0.287975	6.1534e-32
BANP	0.19624	7.23084e-32
RAPGEF6	-0.252725	9.92529e-32
H1FX	-0.298071	1.22898e-31
NKRF	0.211403	1.43901e-31
DSTN	-0.251623	1.80185e-31
KANSL1	0.238311	2.55779e-31
TNFSF14	0.283646	2.59766e-31
CD84	0.19583	3.20495e-31
PSME2	0.238267	5.31661e-31
PLAAT3	0.199366	5.86992e-31
S100A10	-0.165757	7.18505e-31
RHOF	0.206342	8.97126e-31
RPL5	-0.145428	9.76173e-31
TTN	0.224377	9.96369e-31
PRNP	-0.23787	1.22995e-30
KPNA2	0.24584	1.29725e-30
CASP4	0.216394	1.7736e-30
MT1E	-0.88068	2.01899e-30
IGLC3	0.329467	2.48332e-30
SLC1A4	0.240641	3.13999e-30
BTN3A2	0.222082	5.30761e-30
CCR7	-0.34286	5.92351e-30
ITGA4	0.229751	1.26705e-29
ITGAE	-0.254108	2.492e-29
KLF9	-0.235286	3.06789e-29
FP236383.3	0.685457	3.63839e-29
GTPBP1	0.209718	4.53963e-29
GLS	0.221936	5.51817e-29
KLF2	0.22992	5.53386e-29
RNASEK	0.183729	8.76946e-29
TAGAP	0.311824	1.01459e-28
MRPL18	0.219262	1.10829e-28
DDIT4	-0.20997	1.14182e-28
SMS	0.225033	1.20449e-28
LIMD2	0.224793	1.39009e-28
PPP1R16B	0.250338	1.56738e-28
SLC16A3	-0.217708	1.67925e-28
SEPTIN7	0.211782	1.68344e-28
PBX4	-0.225828	1.79034e-28
MT-ND5	-0.231282	1.87595e-28
POLR1E	-0.236433	2.05134e-28
DYNLL1	0.235466	2.38769e-28
TRBC2	0.252278	2.3886e-28
ELK3	-0.22611	2.94551e-28
SIRT2	0.214759	4.51698e-28
IGHG4	0.265637	5.12667e-28
NIBAN1	-0.22096	5.35785e-28
EED	0.166873	7.10451e-28
EEF1G	-0.148377	7.12087e-28
IER2	0.198691	7.63987e-28
TOMM5	-0.242966	8.50611e-28
SLC1A5	-0.247746	8.5373e-28
CXCR3	-0.289397	8.63184e-28
GABARAPL2	0.23477	1.01984e-27
RPL14	-0.114136	1.6079e-27
WIPF1	0.199069	1.7006e-27
HSP90B1	-0.205903	1.81606e-27
LPCAT1	0.179193	2.73811e-27
CKS2	0.266406	3.64495e-27
PPP1R18	0.218404	5.03793e-27
RGS10	-0.234444	7.22675e-27
GUK1	0.197382	7.46976e-27
FP671120.4	0.476268	1.59939e-26
SH3BGRL3	0.188808	1.61034e-26
AC010883.3	-0.215837	1.72146e-26
NFKBIZ	-0.267271	1.7727e-26
KDSR	-0.222768	2.1575e-26
RPL30	-0.102231	2.23774e-26
ATP5IF1	0.217696	2.74945e-26
PRF1	-0.20582	3.18125e-26
MT-ND1	-0.218904	3.92125e-26
MBP	0.223735	4.96984e-26
CSK	0.203389	5.58421e-26
RILPL2	0.190958	5.59668e-26
RCAN2	0.196624	7.51467e-26
HIPK1	-0.220858	7.7557e-26
CAPZA2	-0.221254	9.36735e-26
AC253572.2	-0.30148	9.84739e-26
PTMA	-0.109074	1.03852e-25
SSR3	-0.219343	1.08979e-25
ORAI1	0.21777	1.11665e-25
ARF6	-0.204924	1.25472e-25
LINC00861	0.192632	1.27761e-25
NT5C3A	0.207347	1.3441e-25
PTPRC	0.13667	1.55248e-25
MLLT3	0.198906	1.59219e-25
RPL27A	0.152875	1.91504e-25
ARAP2	0.219396	1.93054e-25
MYO1F	0.167064	2.59721e-25
FAM177A1	-0.209605	2.9258e-25
USPL1	0.225456	2.9995e-25
MACF1	0.230053	3.3091e-25
IFI16	0.203551	3.56838e-25
FXYD5	-0.196383	5.66856e-25
KLRK1	-0.211071	6.86772e-25
BTN3A1	0.175163	6.93122e-25
AHSA1	0.202912	7.14839e-25
RPL39	-0.120037	7.71636e-25
DNAJB6	0.208285	8.12906e-25
HNRNPH1	-0.214664	8.59532e-25
LRRFIP1	-0.190143	1.39745e-24
GABPB1	-0.222752	1.5115e-24
AC058791.1	-0.290464	2.09596e-24
UBE2S	0.201814	2.15016e-24
ARPC2	0.178787	2.27832e-24
RPS12	-0.114315	2.42562e-24
COX8A	0.203657	2.79439e-24
MT-CYB	-0.232568	3.00022e-24
MGAT5	-0.200919	3.05152e-24
FAM241A	-0.198005	3.27866e-24
INPP4B	0.238755	3.57481e-24
RPS6KA3	-0.217503	3.83847e-24
GPR174	0.211424	3.91244e-24
RAB9A	0.20114	5.12649e-24
TSEN34	0.18615	5.5518e-24
ETNK1	0.201053	7.70058e-24
ABRACL	-0.230945	8.26691e-24
SFT2D1	0.141729	1.07238e-23
CCT4	0.238938	1.25798e-23
FAM107B	-0.213202	1.33586e-23
CAST	-0.223648	1.36809e-23
RAC2	0.213774	2.17686e-23
CCL4	-0.160559	3.2767e-23
APOBEC3C	0.171654	3.87866e-23
RPL6	0.115437	4.39068e-23
PTPN7	0.21982	4.63459e-23
EMD	0.199684	4.85388e-23
TRIM26	0.192995	5.02089e-23
PIM1	-0.199398	5.23813e-23
RABEP1	0.1868	5.51422e-23
NCOA1	0.192764	8.60648e-23
COX7A2L	-0.216353	1.21891e-22
PCED1B	0.186223	2.00477e-22
GRAMD1B	-0.184337	2.34297e-22
MYL12A	-0.152098	2.7263e-22
NR4A1	0.404191	3.01386e-22
AP2B1	0.173722	5.11354e-22
PLEKHG2	-0.20352	6.69331e-22
IFNGR1	-0.21885	6.73637e-22
PRKCB	0.179469	8.08984e-22
CXCL8	-0.232358	8.39859e-22
ADA	0.131929	8.58037e-22
CTSS	0.138069	8.80663e-22
GLCCI1	0.191733	9.35995e-22
RPS10	-0.225918	9.58109e-22
ATP1A1	-0.202673	1.16879e-21
PSTPIP1	0.147572	2.23776e-21
RNF125	-0.206114	2.66796e-21
SNX5	0.143323	2.67621e-21
RPS16	-0.132018	3.13334e-21
LINC01943	0.168443	3.983e-21
PPM1G	0.183581	5.1436e-21
SEC61G	-0.206843	5.32672e-21
TRAF3	0.191182	1.09886e-20
BTN2A1	0.14963	1.20664e-20
NFKBIB	0.172674	1.83109e-20
CLK1	0.22667	1.91875e-20
GPR137B	0.166545	2.01395e-20
NDUFB10	0.177881	2.02653e-20
SOD1	0.216053	2.12489e-20
RPL36A	-0.115958	2.71421e-20
KIF13B	-0.206827	3.07783e-20
TGIF1	-0.216817	3.36752e-20
BHLHE40	-0.240628	3.54598e-20
IL4R	-0.178365	3.944e-20
USP36	0.184484	4.19788e-20
SLFN12L	0.148863	5.0327e-20
GNAS	0.136848	5.37089e-20
RSBN1L	0.181062	5.57318e-20
PELI1	-0.235678	5.86696e-20
TMEM120B	0.125795	6.3572e-20
RPS4Y1	-0.173247	6.37722e-20
LUZP1	-0.207277	6.44524e-20
ZNRF1	-0.188506	7.33128e-20
PITPNC1	0.219896	9.11736e-20
LRIG1	0.172141	9.3358e-20
PSMB10	0.178136	9.75122e-20
DAD1	-0.200667	1.13858e-19
SMAP2	-0.14384	1.47624e-19
RGS16	-0.232191	1.61772e-19
CYBA	0.137926	1.63264e-19
RPL21	-0.130041	1.80172e-19
CLDND1	0.258076	1.89585e-19
KIF2A	0.191638	2.01815e-19
MAPRE2	0.210594	2.10451e-19
GADD45B	0.297582	3.18591e-19
PDE3B	-0.229525	3.72897e-19
GIMAP1	0.159267	3.97739e-19
EEF1A1	-0.0995949	4.3654e-19
NAMPT	0.18722	4.71135e-19
PPDPF	0.1698	4.82615e-19
DCP2	0.19097	4.92936e-19
CREBZF	-0.209268	5.39684e-19
UBE2L6	0.173817	5.5145e-19
HSD17B7	0.13502	5.85182e-19
ELL2	-0.195072	6.32841e-19
RPL18	-0.0999594	6.39685e-19
RCAN3	-0.188414	6.67213e-19
GNG2	0.179254	7.02262e-19
MATK	0.188945	8.68096e-19
HERPUD1	-0.173991	1.17533e-18
RAB27A	0.223254	1.20272e-18
AC007384.1	-0.237943	1.39924e-18
PLIN2	-0.255048	1.88861e-18
CLIC1	0.155097	2.06289e-18
PPIB	-0.165518	2.5606e-18
MIS18BP1	0.129577	2.79461e-18
ZBTB10	-0.166763	2.8797e-18
LBH	0.19023	3.07157e-18
ITPRIP	0.171399	3.46364e-18
HAUS3	0.164138	3.51226e-18
DUSP5	-0.235947	3.6944e-18
DGKZ	0.18548	3.71697e-18
CREM	0.179049	6.17626e-18
PPP1CC	0.164191	7.65482e-18
NDUFS5	0.175494	8.76533e-18
NFKB1	-0.221218	9.05716e-18
PSMB8	0.16	1.02364e-17
RASAL3	0.176896	1.07741e-17
IGHA1	0.103752	1.11757e-17
TSC22D4	0.155529	1.14393e-17
ANP32A	0.156968	1.24576e-17
SYT11	0.164522	1.2674e-17
CD48	0.155281	1.27328e-17
CDC14A	-0.217011	1.75822e-17
TPST2	0.182309	1.88143e-17
SLC20A1	0.199611	1.88637e-17
SNHG29	-0.13403	1.96697e-17
SGMS1	0.157387	2.25052e-17
STAT4	-0.172035	2.58169e-17
NAP1L4	-0.188762	3.19423e-17
GLIPR1	-0.194354	3.22643e-17
GRK5	0.211212	3.37556e-17
ABCG1	0.157837	3.46767e-17
STIP1	0.170385	3.80197e-17
RUBCN	0.142399	3.89512e-17
SIPA1	0.156096	4.25433e-17
CD3G	0.152673	4.46794e-17
RPS19	-0.0702444	4.51978e-17
RPS26	-0.111628	5.21912e-17
PARP1	0.151007	5.72895e-17
RGS9	-0.164998	8.04524e-17
OGT	-0.186367	8.20422e-17
CSRNP1	-0.167259	8.52105e-17
ELOVL5	0.186869	9.18872e-17
TRIR	0.16596	1.09051e-16
ANAPC16	-0.183016	1.32259e-16
MRPS6	0.197508	1.4221e-16
STOM	-0.167607	1.46311e-16
CHSY1	-0.173435	1.49627e-16
SUB1	0.139931	1.57578e-16
PPP3CA	-0.185039	1.70652e-16
NCOA2	0.186979	1.72905e-16
MT-ATP6	-0.265783	2.18812e-16
LY9	0.163229	2.84815e-16
CNIH1	0.16546	4.11929e-16
RPS6	-0.102043	4.3033e-16
ADGRE5	-0.203206	4.66609e-16
WEE1	0.141062	5.81122e-16
ODC1	0.168551	7.56934e-16
UQCRB	0.146055	7.95567e-16
CAMK2D	-0.166133	8.12668e-16
NFIL3	-0.182223	9.63195e-16
SOD2	-0.215316	1.00934e-15
SH2D3A	-0.151157	1.53785e-15
AMD1	0.189009	1.56347e-15
MYADM	-0.192665	1.59396e-15
PSMA7	0.160036	1.85654e-15
MID1IP1	-0.177763	2.55037e-15
PRXL2C	-0.182468	2.72594e-15
THAP5	-0.150507	3.32313e-15
SVIP	-0.177584	3.45247e-15
SCLT1	0.16277	3.50106e-15
ATG16L1	0.118219	3.91076e-15
SESN1	-0.196266	3.96219e-15
PRELID1	0.153982	4.01148e-15
CALM1	0.123682	4.10609e-15
TAPBP	0.175546	4.40721e-15
SNHG6	-0.14957	5.69913e-15
GOLGA7	0.156764	6.88756e-15
EIF1B	-0.17211	7.14464e-15
ICAM3	0.157764	7.58103e-15
CBX4	0.15474	8.01033e-15
RGS2	0.246906	8.36727e-15
TMEM38B	-0.154303	1.07275e-14
TIFA	-0.179064	1.18432e-14
AGTPBP1	0.143173	1.29784e-14
TBC1D2B	0.104688	1.30906e-14
HIST3H2A	0.178991	1.40506e-14
RPL7	-0.142987	1.54798e-14
AC016831.1	-0.19906	1.91901e-14
HDGF	0.159154	2.35231e-14
KLF13	-0.170285	2.98447e-14
JARID2	0.170483	3.02662e-14
SAMHD1	-0.187783	3.10336e-14
LIMS1	0.147218	3.62779e-14
SCAMP2	0.116483	4.16288e-14
HMGN2	0.158143	4.3086e-14
CD3D	0.14664	4.98466e-14
NCKAP1L	0.134066	5.983e-14
FYN	0.130012	5.98596e-14
MBNL1	-0.14208	6.5949e-14
RPS28	-0.087501	8.02469e-14
CFL1	0.138203	8.07516e-14
LAMTOR4	0.160795	8.48803e-14
METTL9	-0.160691	8.60873e-14
MYBL1	-0.194299	9.31228e-14
CMTM7	0.161192	9.93133e-14
CD164	0.164623	1.06335e-13
DUSP16	-0.165426	1.11138e-13
RBCK1	0.126314	1.11754e-13
PTK2B	-0.185924	1.27213e-13
ARRDC3	0.156422	1.41419e-13
RPS17	-0.131145	1.48833e-13
SLC5A3	0.172854	1.49397e-13
LCK	0.166893	1.54676e-13
YARS	0.135045	1.58202e-13
LRBA	0.157951	1.60559e-13
AC016831.5	-0.212982	1.7863e-13
XCL2	-0.378013	1.89309e-13
CALR	0.15279	2.15503e-13
RASGRP2	-0.153469	2.25026e-13
GLA	0.169762	2.26548e-13
AOAH	0.181435	2.35011e-13
BUB3	0.157912	2.35413e-13
PLEKHJ1	0.115418	2.35837e-13
MCTP2	0.152324	2.44192e-13
EZH2	0.139621	2.9331e-13
LDHA	-0.155505	2.94481e-13
LINC-PINT	-0.191693	2.97363e-13
NELL2	-0.192059	3.15405e-13
CLEC2D	0.158386	3.25037e-13
STK17A	0.137148	3.27521e-13
FOSB	-0.173048	3.39937e-13
RPL12	-0.104275	3.60446e-13
AKAP13	-0.129972	3.72663e-13
MAP2K2	0.132279	3.92484e-13
PCGF5	-0.154272	4.91733e-13
ATP2A2	0.157489	4.93008e-13
BTD	-0.149921	5.2142e-13
SLC25A26	0.12016	6.09207e-13
CARHSP1	0.152304	6.63792e-13
TAP2	0.15625	6.75886e-13
TMEM170A	0.129775	6.84163e-13
IKZF1	-0.139391	7.45352e-13
EIF1	-0.0762038	7.65556e-13
MXD1	0.186423	8.56602e-13
HSPB11	0.126213	8.59173e-13
SUN2	0.132244	9.7484e-13
ANXA6	0.172843	1.07305e-12
ALDOA	0.221344	1.11333e-12
BAK1	0.126593	1.14413e-12
GCLM	0.157054	1.26132e-12
RPL10	-0.0924802	1.33005e-12
BAZ1A	0.13957	1.39898e-12
HSPA13	-0.149743	1.47894e-12
RPL38	-0.0919027	1.50217e-12
ARL4A	-0.160133	1.65945e-12
PDE4A	-0.162064	1.88895e-12
AL499604.1	0.196114	2.12878e-12
LDLR	0.162543	2.26591e-12
PGGHG	-0.143791	2.32187e-12
SELENOS	-0.171659	2.34999e-12
GYG1	0.12571	2.68183e-12
TAF10	0.124664	2.86791e-12
MEF2D	0.150443	3.16594e-12
PPP1CA	0.142439	3.37356e-12
STX11	0.140667	3.44986e-12
SNRPB2	-0.157721	3.50633e-12
TMED2	-0.152408	3.65021e-12
MAP4K1	0.128573	3.88033e-12
TSPYL2	-0.128538	3.95988e-12
PARD6G	-0.158622	4.26147e-12
RPS24	-0.0751275	6.0982e-12
SERPINB9	-0.179444	7.22668e-12
ZC3H7A	0.135341	7.4912e-12
SFMBT2	0.147612	7.64807e-12
CDC42SE2	0.139536	7.89726e-12
CCDC107	-0.171554	7.9099e-12
SERTAD1	0.192832	7.92461e-12
H3F3B	0.0934288	8.10215e-12
SPTY2D1	-0.161566	8.66336e-12
ELOC	-0.159383	8.66559e-12
UHRF2	0.146291	8.76596e-12
SFI1	0.133815	1.07515e-11
FMNL1	0.115887	1.15424e-11
ZFAND5	-0.173986	1.18137e-11
MIR155HG	-0.204459	1.23368e-11
MECP2	0.156774	1.28238e-11
SRPK2	0.139506	1.28483e-11
TENT5C	0.14154	1.32514e-11
SRSF5	-0.151497	1.42721e-11
HCP5	0.102301	1.49994e-11
CTR9	0.141879	1.5951e-11
MT-CO1	-0.10423	1.69853e-11
PDCD1	0.188727	1.75004e-11
ATG2A	0.157079	2.08096e-11
MYCBP2	0.163633	2.19483e-11
MAP2K1	-0.15408	2.24176e-11
MXD4	0.135095	2.47099e-11
RNF167	0.0950356	2.72359e-11
RHOH	-0.112305	2.73531e-11
PPP1R12A	0.127134	2.82436e-11
REEP5	0.151786	3.15429e-11
FAM3C	-0.145087	3.70247e-11
ANKRD12	-0.159119	3.82399e-11
KDM2A	0.161736	4.06111e-11
PSMB2	0.100526	4.36132e-11
HECA	-0.150337	4.85412e-11
EFHD2	0.0954908	5.12356e-11
APOO	-0.0726862	5.67146e-11
SPTBN1	0.155276	5.82971e-11
TAGLN2	-0.14275	5.8577e-11
RPL10A	-0.0887304	6.05725e-11
TRMT112	0.151009	6.73337e-11
SRGN	-0.0857336	7.6982e-11
LASP1	0.119257	7.73298e-11
ZFAS1	-0.101673	7.73707e-11
NKTR	0.168838	7.95427e-11
MRPL10	0.0975145	8.0562e-11
SERP1	-0.118051	8.21082e-11
SEPTIN6	0.156501	8.41664e-11
RNF19A	0.0949906	9.65922e-11
RBM22	-0.159163	1.05991e-10
ITGB7	0.0693423	1.06076e-10
CD63	-0.13841	1.14629e-10
PRPF38B	0.162116	1.21434e-10
TRAPPC10	0.130903	1.22113e-10
BMI1	-0.128789	1.32586e-10
CARD19	-0.14586	1.34745e-10
CDR2	0.149112	1.3783e-10
SLCO3A1	-0.144919	1.39119e-10
RBM15	0.12636	1.64743e-10
EEF1D	0.0904664	1.68336e-10
TUT7	0.126207	1.79224e-10
RNF168	0.126004	1.87959e-10
WHRN	-0.149801	2.15782e-10
ISG20L2	0.138869	2.3118e-10
CTSD	-0.169871	2.36172e-10
RAB10	0.140283	2.80044e-10
ARID4B	0.138926	2.90212e-10
GALNT10	-0.142166	3.20537e-10
VAMP5	0.116786	3.2382e-10
NFE2L2	-0.14104	3.31364e-10
ACTB	0.212906	3.35965e-10
AGO2	-0.156232	3.54574e-10
CD99	-0.177214	3.58519e-10
EVI2A	-0.149301	3.63005e-10
SKAP1	0.146092	3.84411e-10
HSPA4	0.143013	4.17724e-10
RERE	0.140141	4.6111e-10
SP140	0.13022	5.02509e-10
CD37	0.128266	5.25016e-10
RNPEPL1	0.110926	5.34804e-10
MANF	-0.153968	5.6567e-10
HMBOX1	0.123528	7.01472e-10
SUPV3L1	-0.140199	7.15434e-10
POLB	0.1229	7.23633e-10
TBC1D10C	0.0862546	8.45253e-10
SF3A2	0.149381	9.09718e-10
SURF4	0.150945	1.06291e-09
SURF2	0.119701	1.10624e-09
SEC61B	-0.135838	1.18718e-09
ATP5MC2	0.13888	1.20025e-09
RBL2	0.138421	1.24175e-09
PNRC1	-0.0783143	1.2505e-09
TXN	-0.151951	1.34386e-09
RAB8B	0.149494	1.59636e-09
HM13	-0.150426	1.63473e-09
LSM5	-0.130111	1.65802e-09
CCDC93	0.133332	1.69263e-09
PRDX6	0.137529	1.86466e-09
LYAR	0.152512	1.94014e-09
A1BG	-0.139017	1.9505e-09
ACAP1	0.123765	2.0107e-09
RBFOX2	0.187329	2.02878e-09
ELMSAN1	0.145927	2.30956e-09
ELMO1	0.137491	2.31179e-09
CASP3	0.124678	2.32442e-09
KAT6B	-0.146694	2.54255e-09
SERTAD3	0.12858	2.78455e-09
CRIP1	0.153624	2.86903e-09
XPO1	0.103643	3.30305e-09
MT-CO3	-0.140443	3.34532e-09
ARHGAP26	0.169219	3.71548e-09
EPB41	0.124617	3.79509e-09
ACTG1	0.10922	4.01712e-09
MT1F	-0.452744	4.36235e-09
METRNL	0.137584	4.37463e-09
DNTTIP2	0.147624	4.51626e-09
MTPN	0.144686	5.01468e-09
CKAP2	0.113347	5.07049e-09
CGAS	0.114117	5.53131e-09
DDX18	-0.154019	5.90364e-09
TMC6	0.088772	6.07518e-09
CD6	0.157558	6.34869e-09
ASXL2	0.126684	6.82779e-09
STK10	0.119698	7.2184e-09
AC136475.3	-0.154544	7.26139e-09
NFKB2	-0.156657	7.2936e-09
ZNF217	0.132575	7.31632e-09
MVD	0.140939	7.56256e-09
RRBP1	0.120634	8.33558e-09
PLEC	-0.150382	8.67194e-09
OTULIN	0.128026	9.07258e-09
CDKN1A	-0.147995	9.13702e-09
CEBPD	-0.204056	9.38598e-09
PPP1R2	0.149832	9.96145e-09
PLP2	-0.137832	1.00208e-08
DEGS1	-0.131986	1.06372e-08
C16orf87	0.0776886	1.1192e-08
LAT	0.128924	1.24539e-08
CNOT2	0.128983	1.31418e-08
RPL36AL	-0.0872401	1.34749e-08
YPEL5	0.109421	1.51334e-08
DYNLT3	-0.143027	1.65906e-08
CCNH	-0.12884	1.7371e-08
PTGES3	0.138773	1.8922e-08
ARID5A	-0.114468	1.93464e-08
TRAF3IP3	0.105859	1.94401e-08
ATP5F1B	0.14099	2.06609e-08
PGRMC2	0.115683	2.08671e-08
DBI	0.148103	2.19444e-08
SIT1	0.0935419	2.28305e-08
TGFBR3	0.125794	2.44491e-08
SLC39A8	-0.123749	2.60196e-08
ID3	0.210058	2.60829e-08
ST8SIA4	0.0718906	2.76028e-08
SIAH2	0.131343	3.39066e-08
RPL29	-0.0903059	3.69255e-08
HNRNPU	0.145613	3.91388e-08
MPZL3	-0.144801	3.98968e-08
TFG	-0.123121	4.34667e-08
ANKRD13D	0.123259	4.73092e-08
KAT2B	-0.124578	4.89876e-08
IFITM1	0.0618745	5.52068e-08
KDM2B	0.128345	5.6006e-08
AUTS2	0.121191	5.69122e-08
NDUFV2	-0.141369	5.71577e-08
RABAC1	-0.125054	5.9897e-08
RASGEF1B	-0.137173	6.24449e-08
MTHFD2	-0.134295	6.25749e-08
BCL2L11	0.135702	6.34516e-08
PPP1R35	0.0976741	7.03059e-08
TPM3	0.105287	7.03221e-08
SKP1	-0.115317	7.13671e-08
VOPP1	0.0936212	7.28246e-08
NDUFA2	0.115416	7.57902e-08
NUS1	-0.116561	7.89825e-08
ADRB2	0.122636	7.95337e-08
DYNLT1	-0.141453	8.41685e-08
CYTH1	0.095208	8.8973e-08
NKAP	-0.139667	8.9721e-08
RALY	0.0996119	1.03364e-07
FYCO1	0.120519	1.03506e-07
FOXO1	-0.141128	1.04688e-07
MAN2A1	0.127311	1.06102e-07
HIGD2A	0.12006	1.12511e-07
TMEM147	-0.128813	1.18587e-07
RAB5A	-0.138038	1.20112e-07
CARD8	0.0877895	1.23612e-07
GMNN	0.0816075	1.27847e-07
P2RY8	0.120926	1.35756e-07
TCP1	0.147717	1.4166e-07
ICOS	0.167372	1.47874e-07
FERMT3	0.0811174	1.5252e-07
DBF4	0.0925205	1.65931e-07
UBR2	0.127355	1.79459e-07
C9orf16	0.0950509	1.85064e-07
N4BP2L2	-0.131827	1.8681e-07
MAP1LC3A	0.12671	1.93282e-07
KANSL2	0.110571	1.94462e-07
GIMAP5	0.076676	1.94622e-07
EBP	0.104453	2.16772e-07
BLOC1S1	0.0936824	2.24954e-07
ETS1	-0.112851	2.27061e-07
VPS37B	0.13319	2.31061e-07
SEPTIN1	0.126262	2.36609e-07
CDK2AP2	0.123019	2.36952e-07
FAM118A	0.113141	2.42924e-07
CTNNB1	-0.133979	2.45002e-07
RHOG	0.140807	2.52868e-07
CRY1	-0.134428	2.74093e-07
RAB35	0.113711	2.7422e-07
CIB1	0.110446	2.79643e-07
CDC34	0.114028	3.05763e-07
EVI2B	0.133382	3.11878e-07
OGA	0.096364	3.29846e-07
CYCS	-0.139456	3.48224e-07
B3GNT2	0.116234	3.50199e-07
RNF115	-0.13347	3.51591e-07
TNIK	0.116084	3.60472e-07
MAZ	0.125109	3.60521e-07
RUNX1	0.12426	3.75089e-07
HDAC1	0.0977266	3.77812e-07
ATP5MPL	0.119738	3.96275e-07
LGALS1	-0.0687509	3.98598e-07
CBX3	0.115776	4.25449e-07
ERAP2	0.0504044	4.29273e-07
SOS1	-0.124062	4.55213e-07
BTBD9	0.231893	4.71509e-07
EIF4A2	0.118967	4.98326e-07
CHST12	0.107244	5.5098e-07
RNF169	0.0978334	5.5374e-07
MAP2K3	0.108879	5.85939e-07
APOL6	0.11296	6.2817e-07
DRAP1	0.107149	6.41372e-07
OTUB1	0.107933	6.72389e-07
SS18L2	0.130584	6.8603e-07
ERP29	0.119792	7.22237e-07
NFATC3	0.115784	7.44794e-07
NOP53	-0.0900635	7.60426e-07
PPP2R5E	0.0806477	7.72937e-07
BCL6	-0.126611	7.76369e-07
ASXL1	0.129507	8.18003e-07
GOLGA8A	-0.127967	8.22272e-07
UBTF	0.0798587	8.36948e-07
SSH2	-0.134686	8.41498e-07
DHX36	0.116206	8.93457e-07
HDAC3	0.0933158	9.30137e-07
SIPA1L1	-0.134925	9.46293e-07
RNASET2	0.0801732	9.50778e-07
SHISA5	0.108293	9.70171e-07
GABPB1-IT1	-0.135698	1.06944e-06
RAPGEF2	0.141662	1.14313e-06
TBX21	0.0906833	1.17945e-06
TMEM243	-0.128267	1.2638e-06
NFAT5	0.090057	1.27342e-06
SEC62	-0.126614	1.31662e-06
GPI	0.123688	1.38569e-06
SP110	0.104131	1.39851e-06
DUSP10	-0.130696	1.41356e-06
SSR4	0.112527	1.42339e-06
PSMB6	0.12122	1.46452e-06
FCMR	0.13214	1.46947e-06
STK24	-0.138341	1.49834e-06
UBE2H	0.108744	1.68982e-06
DAXX	0.116495	1.83265e-06
EIF3E	-0.116782	1.87829e-06
FAM102B	0.134499	1.88007e-06
GOLGA8B	-0.118208	1.92548e-06
LSM2	0.0764608	1.9608e-06
G6PD	0.0813458	2.00379e-06
ZBTB43	-0.127376	2.03361e-06
USP24	0.131248	2.25361e-06
LSP1	0.129932	2.30041e-06
HMGA1	0.115666	2.41987e-06
MARK3	0.110143	2.42875e-06
NUDT21	0.0916581	2.46809e-06
ZAP70	0.0896132	2.48913e-06
RBMX	-0.119724	2.54745e-06
KIF21A	0.0910561	2.63297e-06
TXNL1	0.0977342	2.63659e-06
TRAF1	-0.101597	2.77133e-06
GSTP1	0.112425	2.80692e-06
AHNAK	-0.147802	3.04301e-06
MALAT1	0.135681	3.05853e-06
MXRA7	-0.13657	3.14912e-06
BTF3	-0.090009	3.18628e-06
EPS15	0.102611	3.75679e-06
GABARAP	0.101174	3.89925e-06
ADK	-0.127656	3.94121e-06
BRD2	0.112754	3.94341e-06
PDE4B	0.12711	4.14694e-06
FAM111A	0.0894116	4.17874e-06
GTF2B	-0.129108	4.32291e-06
TMC8	0.0999077	4.51991e-06
TBL1XR1	0.080209	4.56497e-06
ARHGAP5	-0.110375	4.58046e-06
NAA38	0.0555443	4.70046e-06
AP3S1	0.0810963	4.82308e-06
RGS1	0.11084	4.94188e-06
SSNA1	0.0996147	5.03142e-06
REV3L	0.11209	5.03656e-06
DUSP6	-0.133886	5.30985e-06
IKZF3	0.108768	5.31736e-06
CMC2	0.109009	5.31989e-06
CCPG1	0.0748915	5.33073e-06
DLGAP4	-0.10496	5.36098e-06
RNF7	0.115126	5.43971e-06
SENP7	0.118609	5.81086e-06
PHPT1	0.0894021	5.91087e-06
MSL3	0.0930381	5.91616e-06
IP6K2	0.0918497	6.50305e-06
DNAJC1	0.118714	7.37619e-06
ATRX	0.0897913	7.91305e-06
ELOA	0.0852862	8.17686e-06
ANTXR2	-0.118154	8.20245e-06
PAIP1	0.101197	8.63166e-06
CNPPD1	0.0975947	8.89912e-06
TRAC	0.119141	8.91154e-06
PPHLN1	0.100962	9.52914e-06
UBE2L3	0.097294	1.06153e-05
AIP	0.10169	1.06686e-05
ZBTB7A	0.119472	1.15096e-05
LPXN	0.100363	1.17911e-05
SIGIRR	0.0959308	1.27303e-05
NDUFA12	0.11178	1.2741e-05
GNB2	0.110254	1.36125e-05
OXSR1	0.109774	1.44654e-05
SH3GLB1	0.11533	1.48005e-05
HABP4	-0.113184	1.49577e-05
TMA7	0.0999082	1.60286e-05
PGP	0.078627	1.63671e-05
CPNE3	0.0774441	1.6453e-05
RASD1	-0.144106	1.71994e-05
TNRC6B	-0.124297	1.73314e-05
ZEB2	0.121706	1.80939e-05
COX7B	-0.0991904	1.82484e-05
ZEB1	-0.137775	1.89832e-05
HMGB1	0.0845152	1.91362e-05
SSBP4	0.0944181	2.11308e-05
IVNS1ABP	-0.131289	2.12119e-05
CIAO1	0.105751	2.15294e-05
SH2D2A	0.150031	2.17529e-05
PRRC2B	0.05968	2.23862e-05
MBNL2	0.123738	2.24366e-05
POLR2K	-0.135706	2.36622e-05
REL	0.0824215	2.57979e-05
TRPS1	0.115697	2.65873e-05
NME2	-0.107882	2.76279e-05
RNF166	0.10764	2.84719e-05
RPL41	-0.111225	2.8815e-05
PSMD8	0.106671	2.88952e-05
IDH3G	0.0585034	2.96227e-05
NCOA7	0.100536	2.98563e-05
MALT1	-0.116866	3.05728e-05
ARPC4	0.118641	3.06523e-05
ATP11B	0.134981	3.06845e-05
LY6E	0.115382	3.13562e-05
SRSF11	0.0986663	3.29931e-05
OSBPL8	0.12683	3.32046e-05
ZNF106	0.0936593	3.55512e-05
MDH2	0.0612534	3.74684e-05
HNRNPA2B1	0.0904233	3.75516e-05
TRAM1	-0.110846	3.79259e-05
FNBP1	0.109	3.82767e-05
GRB2	0.0939053	3.88032e-05
CD8A	-0.0855801	4.04186e-05
ZDHHC20	0.0969256	4.21575e-05
IFI27L2	0.0562675	4.36901e-05
TRAF5	0.0773004	4.44605e-05
PXN	-0.110178	4.45507e-05
KHDRBS1	0.0797857	4.91189e-05
ARHGAP4	0.0946254	4.97124e-05
SEM1	0.0517923	5.06831e-05
PPP3CC	0.115756	5.11565e-05
H2AFX	0.120621	5.30001e-05
TMED10	-0.109152	5.45819e-05
CLEC2B	0.0818823	5.53803e-05
PSAP	0.0830905	5.738e-05
TMEM70	-0.106766	5.7743e-05
RPS15	0.0508518	6.17353e-05
MAPKAPK2	-0.11646	6.57504e-05
POLR2A	0.111599	7.00496e-05
C17orf49	0.070755	7.15489e-05
SLC2A3	0.117767	7.1559e-05
CLTB	0.0681446	7.46041e-05
SMARCE1	0.0748803	7.61699e-05
SETX	0.110404	7.67411e-05
APEX1	-0.108774	7.7429e-05
CNPY2	0.0749104	7.9891e-05
ATP6V0B	0.0849015	8.1692e-05
CMTM6	-0.118409	8.18547e-05
KIAA1109	-0.119481	8.72083e-05
PARP14	0.0848988	8.96847e-05
VCP	0.121769	9.05448e-05
ING2	0.100209	9.29826e-05
MAPK1	0.0858922	9.47844e-05
PPM1B	0.0997801	0.000105737
RPL37	-0.0691369	0.00010724
ERBIN	0.0690605	0.000110807
HINT1	0.0900179	0.000116967
CTCF	0.0765236	0.00011805
ATF4	-0.10076	0.0001215
ATF3	0.157625	0.000126803
KLF12	0.0997141	0.000130925
SLC2A4RG	0.113593	0.000135334
TAOK3	0.0976037	0.000142631
MARK2	0.0831464	0.000148127
RGS14	-0.104488	0.000149148
BRK1	0.0542069	0.00015393
TMX4	-0.134485	0.000172677
COX5A	0.0839778	0.000179158
RPLP2	-0.0718919	0.000182881
UBA6	0.0930446	0.000202475
ERH	-0.103942	0.000211951
RCHY1	0.0806626	0.000215908
SLC25A25	0.0887983	0.000230931
RANGAP1	0.0955189	0.000231395
TYMP	-0.115982	0.000233763
TMEM109	0.11025	0.000234943
COX7A2	-0.106606	0.000243453
DYNLRB1	0.098728	0.000244219
PGAM1	0.0960151	0.000244783
REEP3	-0.093989	0.000245289
PRKY	0.120714	0.000249999
BCL7B	-0.102019	0.000262738
L3MBTL3	0.0933416	0.000280087
KIF21B	0.0971085	0.000285838
S1PR4	0.0929353	0.000289324
ZBTB11	0.119616	0.000298755
THEMIS	0.121476	0.000300483
TNFRSF1B	0.110042	0.000332433
BCL7C	0.0845476	0.000334058
EIF3G	0.103855	0.000342047
TRA2A	0.107613	0.000350013
SQOR	0.0670675	0.000356005
TPP1	0.0959938	0.000360829
MEX3C	0.0925617	0.000371599
TP53INP1	0.0769174	0.000373576
GLTP	0.0662567	0.000379019
MRPS34	0.0987567	0.000379103
DANCR	-0.11182	0.000379503
CLNS1A	-0.0982963	0.000382521
ABCC1	-0.116099	0.000383975
RBM39	0.0947831	0.00038669
TPI1	0.100795	0.000396002
SBDS	-0.110031	0.000402718
UBL3	-0.116174	0.000414573
GNAI2	0.095251	0.000444181
RBM17	-0.112295	0.000452536
DHRS7	-0.122822	0.000470861
PKN1	0.0809373	0.000479148
WDR1	0.0977033	0.000483448
IKBIP	0.100622	0.000502919
APBB1IP	0.105982	0.000505504
LACTB	-0.105646	0.000521584
SNRPA	0.0688194	0.000572137
PRPF40A	0.102513	0.000596777
LRP10	0.122258	0.00061204
AP2S1	0.063301	0.000621389
CMPK1	-0.113467	0.000631113
IFI30	0.113606	0.000641558
MYDGF	-0.0851642	0.000658835
CLTA	0.0704907	0.000658917
NAP1L1	-0.0963166	0.000674741
SLAIN2	-0.0983162	0.000683672
RASSF3	0.105832	0.00070067
SRRT	0.117923	0.000707287
NOSIP	-0.0977876	0.000712922
UFM1	-0.103439	0.000716915
ATP5F1A	0.0754909	0.000723144
JAK1	-0.0918859	0.000725523
RASA2	0.099114	0.000725542
CASK	-0.111593	0.000756802
MPHOSPH8	0.105194	0.00076066
DNAJC7	0.064353	0.000765968
RPS6KA5	-0.105447	0.000769629
ARHGAP30	0.103308	0.000783469
LPAR2	-0.0994471	0.000835699
SERF2	0.0707364	0.000940218
AFTPH	0.102363	0.000995078
KMT2E-AS1	0.0844249	0.000997587
MYL12B	0.0883568	0.00100289
CCDC88C	0.104224	0.00101164
STARD3NL	0.0755725	0.00103809
UBN1	0.0770528	0.00106651
IST1	0.101532	0.00107928
FAM102A	0.0840343	0.00108197
TPR	0.0864232	0.00108441
TMEM107	-0.112471	0.00109925
STAT1	0.0850724	0.0012161
UBE2E3	0.0922746	0.0012175
EIF2A	-0.107051	0.00123194
RC3H2	0.0560321	0.00126546
MT-ND6	-0.141395	0.00129058
CCT3	0.110573	0.00130466
UQCR10	0.0710343	0.00136236
PRKX	0.101803	0.00137175
NOLC1	-0.0987308	0.00142257
NABP1	0.121401	0.00150689
RAB21	-0.109018	0.00160707
PSMA5	0.0698881	0.00188353
LAMP2	0.0819151	0.00189939
GTDC1	0.1025	0.00190114
LPAR6	-0.106019	0.00190832
H2AFZ	-0.0991735	0.0019447
ERGIC2	-0.0909242	0.0019785
NR4A3	0.0782724	0.00201072
ANKRD11	0.0909724	0.00204094
EDF1	0.0989671	0.00205568
AC016074.2	0.112677	0.00206373
SPCS2	-0.104859	0.00207391
TOPORS	0.0960767	0.00216375
VPS28	0.0618356	0.00218845
BSG	0.109795	0.00220099
RFTN1	0.0796381	0.00226435
MXI1	-0.0801089	0.00237453
SELENOW	0.0995185	0.00240969
ISCU	-0.0933162	0.00247166
LINC01138	-0.12138	0.00252232
2024-03-09	-0.0943337	0.00259703
RAC1	0.09837	0.00272184
ZNHIT1	0.0696355	0.00283232
GCHFR	-0.0555893	0.00289435
ITK	-0.10599	0.00305968
KIAA0232	0.0853735	0.00316527
NDUFA13	0.100986	0.00327622
USP42	0.0821941	0.00333483
FUNDC2	-0.103823	0.00342006
SLC9A3R1	0.0978925	0.00353285
ZNF292	0.0619999	0.00356871
CD52	0.11562	0.00364918
DIAPH1	0.0837842	0.00368495
INPP4A	-0.106839	0.00374221
STAM	-0.0959272	0.00378232
KDM5A	0.0641654	0.0038319
ARRDC2	-0.0923505	0.00394612
CD59	-0.0939268	0.00394722
DDIT3	0.127847	0.0039822
RTN4	0.107967	0.00402982
CKLF	-0.11794	0.00413323
GABPB1-AS1	-0.110615	0.00415128
ARNTL	-0.094182	0.00422562
EZR	-0.0925629	0.00422618
SMCHD1	0.0739246	0.00422761
DDX6	0.0985593	0.00423186
CREB1	0.101272	0.00425129
RAP2B	0.111196	0.00437631
CDK12	0.0959968	0.00449495
HMGN4	0.102233	0.00471946
HMGN3	-0.0770388	0.00474624
HLA-F	0.0858621	0.0048089
RFC1	0.0727256	0.00501873
PPP3R1	0.100623	0.00517285
BTF3L4	-0.0921281	0.00529527
FRMD4B	0.125961	0.00541326
ATG3	0.0865549	0.00543238
SLC16A1	0.0882123	0.0055291
CCSER2	0.0853468	0.00554774
IL2RG	0.0912834	0.00558247
DDX27	0.0725327	0.00562123
PML	0.0638882	0.00568928
ACTN4	0.0768913	0.00585448
XRN1	0.0853249	0.00611749
ATRAID	-0.0956841	0.00626383
TANK	-0.0910241	0.00630212
SLFN11	0.108873	0.00639091
ARF4	-0.103886	0.00654379
SSU72	-0.106643	0.00674784
ENO1	0.096076	0.0068598
SMARCA5	0.0986629	0.00696442
SAT1	0.124902	0.00707851
GRK2	0.10081	0.00720385
GNA13	0.112787	0.00729812
UPP1	0.0978771	0.00733918
AC016831.7	-0.109637	0.00739866
ACIN1	0.0770866	0.00775372
CDV3	-0.0750331	0.00790819
CYB5A	-0.0981109	0.008216
TXNDC11	0.0884762	0.00823724
COMMD7	0.0633291	0.00831727
REX1BD	0.0537928	0.00848745
KRAS	0.102143	0.00848817
PCSK7	0.0630059	0.00854506
C1orf56	-0.106066	0.00865708
RPL18A	-0.0634187	0.00875793
CARS	-0.08657	0.00881429
PSMB3	0.0853119	0.00898063
EML4	0.0621756	0.00898834
CAPN2	0.0727172	0.00914396
TRAPPC1	0.0680575	0.00915612
PHF20	-0.0989812	0.00925144
ACADVL	-0.0993935	0.00995978
KMT2E	-0.0746964	0.0104914
EIF2S3	-0.0983857	0.0106421
SRSF4	0.0903531	0.0107335
CFLAR	-0.0926326	0.011185
IGHM	0.059055	0.0118525
SRPK1	0.0592199	0.0118625
ATP6V0D1	0.051064	0.0119486
RAB5IF	0.09705	0.0124727
ATP5MF	0.0617529	0.0131185
ATXN7	0.0727736	0.0132281
LAMTOR5	0.0619789	0.0136823
PLEKHB2	0.085596	0.0142604
NMRK1	-0.10136	0.0148936
H2AFY	0.0557702	0.0150094
HNRNPDL	-0.0568267	0.0150151
ARL8A	0.086828	0.0153785
PLEKHF1	0.0746424	0.0157997
JADE2	0.0780942	0.0158917
SLC4A7	0.0755594	0.016118
UBC	0.111985	0.016235
PCBP2	-0.0935549	0.016262
KMT2A	0.0908684	0.0162642
PSMC5	0.0825333	0.0162783
FNBP4	0.0912612	0.0163075
HIST1H1D	-0.0602642	0.017618
FUS	0.108365	0.0179193
GAS5	-0.0578221	0.0179567
SORL1	-0.0934663	0.0182678
CSTB	0.0993468	0.0185166
FGFR1OP2	0.0961474	0.0191873
C21orf91	-0.103406	0.0192575
NDRG1	-0.102103	0.0202451
RIOK3	0.0539769	0.0204746
GRAMD1A	0.087905	0.0208272
GNL3	-0.0899558	0.0209474
ATP5MC3	0.0888122	0.0213132
NCBP3	0.0849124	0.0219619
UBE2A	0.0956098	0.0220415
GATA3	-0.0527305	0.0221565
BCL2A1	-0.135526	0.0223516
ATP5F1D	0.0728309	0.0230583
SDF2	0.0639189	0.0233292
TWF2	0.0647626	0.0233587
PHIP	0.0960679	0.0235571
DENND4A	-0.121542	0.0258217
LENG8	-0.0948573	0.0258409
HOOK2	0.131268	0.026403
TACC1	0.0798968	0.0264235
PTEN	0.0662116	0.0268333
SNRPD2	0.0671927	0.0286261
TCF7	-0.103351	0.0287282
NAPA	0.0758984	0.0289499
ILRUN	0.0602457	0.0290431
NUFIP2	0.111482	0.0291574
MADD	0.072646	0.0293765
PTPRA	0.0754726	0.0294632
CCDC32	0.0613869	0.0300656
PAXBP1	0.0668794	0.0305293
RDH11	0.0562978	0.030683
SYPL1	-0.100026	0.0306915
DLEU2	0.0674969	0.0312362
NCOR1	0.0605289	0.0317184
RESF1	-0.0776401	0.0319052
TRIM33	0.0857467	0.0329379
NRBP1	0.0922867	0.033031
TKT	0.103973	0.0330814
FDX1	-0.0581823	0.0331714
ORMDL3	0.0853326	0.033639
MAP4K4	0.0779751	0.0347548
NACA	-0.0528262	0.0356818
FBXW11	0.0627198	0.0370529
UBALD2	-0.0869735	0.0371574
YAF2	0.092915	0.0381093
AKAP8L	0.0791475	0.0383544
TMEM14B	-0.0904146	0.0385523
VMP1	0.107129	0.0388035
C12orf57	0.0803339	0.0406307
SH3BGRL	0.0661084	0.0406343
TAP1	0.0979497	0.0407836
ARID1B	0.0801679	0.0407876
BRD7	0.101772	0.041676
OFD1	0.0915086	0.0426802
FAM49B	0.0847003	0.042944
BTG2	0.123267	0.0439877
SARNP	0.0654546	0.0445142
TGFBR2	0.0913181	0.0457627
CUTA	0.0598288	0.0458886
SEMA4D	0.0777872	0.0463751
MBD5	0.0751817	0.0465639
ABI1	0.0715399	0.0477818
KIF5B	0.0770314	0.0481062
BNIP3	-0.0877415	0.0483965
Note: Avg_log2FC>0 genes overexpressed in GZMK+ CD8 T cells; Avg_log2FC<0 genes overexpressed in GZMK- CD8 T cells.

## Sheet: table S3 IPF vs Con GZMK+ CD8T 
table S3. Differentially expressed genes in IPF vs. Control GZMK+ CD8 T cells
Gene	Avg_log2FC	Adjusted_pValue
FP236383.3	5.86656	0
HSPA6	3.22924	3.9258e-305
HSPA1A	2.88998	0
DNAJB1	2.40748	0
FP671120.4	2.40141	0
HSPA1B	2.39391	0
HSPH1	2.01847	0
HSP90AA1	1.78375	0
BAG3	1.56999	1.13539e-155
HSPA8	1.56152	0
HSPB1	1.55817	4.19991e-206
RBFOX2	1.44324	0
SERPINH1	1.42912	1.60182e-147
NR4A1	1.41291	1.77513e-164
CD74	1.36767	0
HSPD1	1.29194	2.76297547976834e-310
IGHG3	1.22726	5.75119e-272
IGLC3	1.20946	8.18716e-181
IGLC2	1.18876	2.84376e-271
IGHG4	1.13052	1.28047e-258
IGHG1	1.0571	4.39124e-225
HLA-DRB5	1.04441	5.16436e-246
ZFAND2A	1.03608	1.72898e-79
CCL3L1	1.01974	8.51775e-128
CCL5	0.965213	0
HSPE1	0.938648	1.16147e-132
PTPRCAP	0.936799	9.51933e-193
SIK3	0.926305	1.22956e-139
APOO	0.913456	1.46307e-194
PLAAT4	0.907491	2.35645e-189
ACTB	0.898809	3.5237e-143
CRIP1	0.886874	1.46429e-162
HLA-DRA	0.866273	2.36223e-150
HSP90AB1	0.86393	4.81878e-172
ITGB2	0.837696	9.91831e-180
COTL1	0.80163	1.15424e-182
NKG7	0.800842	2.20469e-264
MT-ATP8	0.787847	1.95239e-76
IGKC	0.785174	1.04985e-148
DNAJA4	0.775039	8.56054e-94
LINC02446	0.774538	4.20396e-48
CORO1A	0.769862	5.38396e-124
CCL4L2	0.765352	6.59584e-100
CNN2	0.763437	1.27012e-147
GZMA	0.751894	3.15699e-89
HLA-DPA1	0.729528	1.94342e-141
AHNAK	0.726424	2.12285e-116
PRKCH	0.706858	3.79789e-99
FYB1	0.701453	9.27303e-148
PMAIP1	0.699671	2.09919e-101
CD52	0.691916	1.12498e-84
IGKV3-20	0.688726	3.13639e-113
LSP1	0.687193	4.06118e-83
HLA-DQA1	0.686724	8.5473e-91
CSF1	0.676651	2.63716e-73
DUSP4	0.652606	1.32023e-83
HLA-DPB1	0.643214	1.82587e-120
LIME1	0.632596	1.05982e-114
ANXA6	0.631586	1.15365e-92
GAPDH	0.620117	3.92529e-118
ELOVL5	0.615436	5.93724e-79
BTBD9	0.612786	1.66229e-38
TAGAP	0.610866	1.78784e-53
HOOK2	0.608189	1.32137e-74
HNRNPLL	0.607143	4.24458e-70
VIM	0.605853	2.20316e-133
CAMK4	0.60527	1.09546e-79
ABHD3	0.604023	9.11437e-70
SH3BGRL3	0.602163	8.15341e-105
ALDOA	0.599053	2.42515e-74
TRAF1	0.597354	1.0828e-67
MAPRE2	0.594158	2.57366e-82
HLA-DQB1	0.585435	6.88221e-73
DNAJB4	0.582185	1.94396e-69
SEPTIN6	0.577157	2.53649e-93
CD27	0.5742	1.05677e-89
OASL	0.571494	2.11318e-50
GBP2	0.570797	6.50203e-91
AC138123.1	0.570385	7.56881e-182
ZYX	0.569819	1.03819e-78
IGLC1	0.565497	4.06609e-61
STAT5B	0.564302	1.08154e-87
AL135905.2	0.56378	3.06719e-86
MACF1	0.560136	5.02867e-75
MRPS6	0.544919	3.69575e-64
ACTG1	0.542514	4.7966e-119
FKBP4	0.536798	4.36621e-61
MOB4	0.535398	1.24599e-38
CACYBP	0.534308	7.07063e-57
NFATC2	0.528882	9.09045e-63
HIST1H2AC	0.518504	1.55321e-50
ZC3H12A	0.515131	3.36011e-49
HCST	0.512143	5.10206e-54
STARD7	0.510384	2.12448e-51
GZMM	0.510221	3.13204e-64
RABGAP1L	0.503675	1.54697e-51
GZMH	0.500802	2.07493e-54
SQSTM1	0.498924	6.80249e-43
NEU1	0.497601	4.04018e-52
ATXN1	0.496945	1.79178e-58
MSN	0.490492	2.65143e-65
EZR	0.489848	7.50379e-82
AC243829.1	0.486554	1.06266e-95
INPP4B	0.486438	1.28093e-59
TNFSF14	0.486174	3.27398e-37
CHORDC1	0.480518	5.46788e-48
HNRNPU	0.479631	9.07309e-62
IDH2	0.474156	3.88419e-63
SKAP1	0.473266	1.97238e-44
GBP5	0.47206	1.72446e-46
MIR4435-2HG	0.47162	2.43533e-77
TNFSF9	0.469861	4.38693e-14
SH3KBP1	0.469839	3.69969e-56
DYNC1H1	0.458358	4.66353e-53
NFKB1	0.456501	2.04129e-23
HMGA1	0.455518	4.20072e-64
TAGLN2	0.44704	1.11965e-41
KLRG1	0.440919	1.43267e-46
DNAJA1	0.440703	1.28376e-31
PTPRJ	0.438274	8.28918e-46
FOXN3	0.438135	2.7066e-45
ANKRD44	0.436523	2.90665e-46
RAC2	0.435606	3.59798e-48
TECR	0.434723	7.26617e-34
PPP1R16B	0.432932	2.35576e-39
SLC2A3	0.430867	5.92712e-54
SPTBN1	0.429227	3.17165e-60
CD83	0.428772	4.57006e-20
ABCG1	0.427006	1.52791e-65
CDC14A	0.426195	1.49332e-34
DENND4A	0.420889	1.519e-25
CD5	0.419014	7.54956e-44
PDE7A	0.417843	4.5751e-43
CLIC1	0.416209	8.11857e-64
APBB1IP	0.415955	4.8122e-46
USPL1	0.415168	1.219e-49
UBC	0.415025	4.16159e-47
ATP5MC2	0.414594	2.23055e-55
SEPTIN9	0.41405	2.24465e-46
RHOF	0.413588	1.89049e-51
FLNA	0.413216	6.90354e-41
ZBTB20	0.413201	1.05219e-44
GLS	0.409344	9.89731e-50
NEK7	0.406059	4.45192e-36
VCAM1	0.405584	8.59493e-32
ARIH1	0.40327	6.15972e-32
UTRN	0.402862	6.78938e-41
HIGD2A	0.399623	3.66573e-46
TNFAIP8	0.399445	4.64578e-35
SLC5A3	0.398534	2.95388e-39
EVI2B	0.398515	6.44866e-43
LYST	0.394234	2.15048e-41
ITGB2-AS1	0.391443	2.95593e-84
DEDD2	0.387187	4.20689e-39
BICDL1	0.38691	6.02717e-46
TAPBP	0.385819	1.01073e-32
ID3	0.38511	1.32456e-15
GZMK	0.384398	7.62305e-69
MATK	0.380724	1.61333e-35
HLA-DMA	0.378643	3.20728e-48
TRGV10	0.378583	7.31898e-23
PFN1	0.374568	3.0489e-40
SEPTIN1	0.374343	1.49605e-31
IFITM1	0.373915	1.88363e-30
CHD3	0.373132	6.06765e-44
PSME1	0.372668	5.49577e-48
ARHGAP15	0.371634	1.34093e-26
IL21R	0.370792	5.80512e-37
DLEU2	0.368974	1.48143e-45
PRKX	0.368041	5.63209e-44
SH2D2A	0.366319	2.83945e-33
NFAT5	0.363507	8.68511e-31
DEF6	0.362284	4.68667e-42
ZC3HAV1	0.362113	3.29557e-28
ARHGAP26	0.361087	6.83097e-24
GIMAP7	0.359712	1.01677e-27
STAT5A	0.357475	3.04575e-30
ZNF331	0.35683	4.53275e-25
CDK6	0.354529	1.7275e-35
TNIK	0.354416	4.63571e-36
MXD1	0.353937	4.3667e-26
ATP2B1	0.353889	7.82965e-37
EMD	0.353706	5.61767e-35
RASGRP1	0.353629	6.55682e-36
CD81	0.353594	9.59608e-33
SYNE1	0.3532	1.27837e-28
TUBA4A	0.351868	2.63776e-20
CD3E	0.351358	1.25633e-33
PRKACB	0.350684	6.35485e-40
CD6	0.34952	8.80468e-33
ARHGAP4	0.346449	5.59569e-33
YWHAZ	0.346294	1.28832e-54
SRPK2	0.345847	3.41069e-38
DOK2	0.345472	1.36918e-33
TOX	0.345338	1.25645e-26
EEF2	0.344187	9.83877e-35
LBH	0.342734	1.51407e-30
RBL2	0.341049	1.52398e-32
LAT	0.340842	1.73405e-35
HERPUD2	0.340663	1.2875e-34
SMC4	0.339922	1.15449e-31
EOMES	0.338783	1.4131e-25
GLA	0.337511	3.36817e-27
PLEC	0.33621	7.05349e-27
AL035530.2	0.335399	1.44065e-33
PPDPF	0.335305	6.73211e-46
TNIP3	0.33521	2.20691e-30
ANXA1	0.334666	2.4858e-17
SP140	0.334131	9.76861e-36
ACAP1	0.333602	4.32008e-34
NIN	0.333182	3.66225e-29
GTPBP1	0.332385	5.3125e-35
CALM3	0.332147	7.20014e-35
GGA2	0.331605	5.43649e-30
RGS2	0.331075	4.49526e-09
PPP1R15A	0.33098	1.26714e-18
CREB1	0.3303	4.23541e-29
GPR174	0.329655	1.6427e-30
ARHGEF1	0.328285	1.88352e-31
KIF2A	0.327837	1.45031e-37
LCP1	0.326635	3.09654e-43
ITGA4	0.32491	9.73585e-29
CYTOR	0.323819	8.69382e-31
CD3G	0.321567	1.87825e-33
TMBIM1	0.32108	9.61104e-34
WNK1	0.320495	1.60569e-31
TRBC1	0.319418	6.32028e-16
HERC1	0.31914	9.94884e-29
KDM6A	0.319002	6.05257e-29
NSD3	0.318928	2.80507e-29
NFKBIE	0.318467	4.52727e-33
UCP2	0.318134	4.88082e-23
EPS15	0.317523	3.10021e-24
ATF3	0.31697	1.18943e-17
TRG-AS1	0.316847	2.83948e-24
PACS1	0.316176	6.58355e-39
ATP11B	0.316094	3.09649e-19
ITM2A	0.31524	4.58502e-21
AC016831.7	0.314938	2.67866e-19
LY6E	0.314445	1.54311e-30
CORO1B	0.314406	1.48613e-37
HIST3H2A	0.314324	2.587e-19
FAM118A	0.313482	4.22701e-30
CMTM7	0.312995	1.01251e-28
CYTH1	0.312942	1.78311e-31
NLRC5	0.311971	1.81522e-25
GABARAP	0.311572	1.71653e-35
MRPL18	0.311539	7.21967e-24
GSTK1	0.309988	1.49322e-20
CARD16	0.309558	6.42315e-32
TUBA1A	0.308994	3.38046e-10
ATP5F1D	0.308063	1.01537e-39
TAB2	0.307387	3.97192e-24
FABP5	0.306689	4.17266e-17
ZEB1	0.306637	7.48584e-26
STIP1	0.306125	2.72343e-22
EML4	0.304138	3.64524e-33
ARHGAP25	0.304017	2.04339e-25
ZNF10	0.303697	2.35745e-26
PRKCB	0.302541	1.17413e-29
GIMAP4	0.302327	6.90465e-25
THEMIS	0.301687	9.25529e-17
APOBEC3G	0.301517	5.54936e-27
PPP1R18	0.301209	6.2202e-31
TBC1D10C	0.299595	3.67306e-36
CD44	0.299217	1.25623e-42
TMEM131L	0.298983	2.61301e-26
ATP8A1	0.296352	2.2109e-25
PLP2	0.295864	2.21745e-25
ARL6IP5	0.295807	4.93996e-24
MBNL1	0.294358	1.83584e-34
CCT4	0.293889	5.04519e-15
UBE2H	0.293488	3.40088e-26
TMC8	0.293435	2.21733e-31
TCF7	0.2929	9.15169e-25
ATF7IP	0.292576	1.56867e-20
TRIM26	0.292213	5.44877e-29
NKRF	0.291953	3.90882e-32
FAM102A	0.291723	4.97907e-35
ITGB1	0.291242	2.59108e-17
TMSB4X	0.291141	1.63228e-65
LINC01619	0.290822	4.46932e-26
CRTAM	0.290743	2.12356e-20
GLIPR2	0.290538	7.93093e-23
SYT11	0.289945	5.77436e-27
TGFBR2	0.289438	8.92557e-19
SMARCA2	0.289426	8.32144e-24
LPIN2	0.287303	3.95888e-26
MORF4L2	0.286753	3.34651e-12
PTPN7	0.286705	1.94325e-17
P2RY8	0.286559	4.0672e-21
ITGAL	0.286283	5.06884e-22
C5orf56	0.286014	2.99224e-21
DENND2D	0.285876	2.11891e-25
ELMO1	0.285772	1.20287e-23
TRAF3IP3	0.285595	4.18386e-22
EGR1	0.285514	2.02225e-11
LRBA	0.28551	1.10837e-27
RAB11A	0.285447	3.01833e-17
ANKRD37	0.284596	8.19751e-14
FBXO34	0.284534	1.77321e-28
SPATS2L	0.28427	2.51171e-20
ZSWIM6	0.284239	1.54444e-12
SCLT1	0.284063	1.09847e-25
GALM	0.283888	6.90059e-25
SCML4	0.283512	7.84419e-25
YPEL5	0.282582	4.42592e-23
TNFRSF14	0.281416	2.69572e-32
PSMB10	0.281261	8.3089e-20
PPP1CA	0.281193	6.19938e-18
LIMD2	0.281	2.18103e-22
POLD4	0.280336	3.56761e-35
PAG1	0.280101	3.71172e-24
CHST11	0.279975	6.8733e-08
LDHB	0.27918	3.57292e-23
TCP1	0.279032	7.91949e-16
TTN	0.278339	9.10183e-17
CAP1	0.277611	1.32943e-20
LCK	0.276868	5.28156e-22
MHENCR	0.276789	1.02139e-29
RASA2	0.275292	2.85766e-19
NUCB2	0.274628	1.23714e-17
TTC19	0.27447	6.57653e-25
JPT1	0.274379	1.9954e-17
ITGB7	0.273335	4.32095e-25
NELL2	0.273002	2.91988e-19
NCOA2	0.272066	1.14143e-19
PTPN6	0.272029	4.08025e-28
MLLT3	0.271836	4.74411e-24
PIP4K2A	0.271438	7.11495e-21
TMC6	0.271032	2.67654e-25
PYCARD	0.271	5.76653e-37
LRRFIP1	0.270814	4.95176e-25
ORMDL3	0.268963	2.2554e-23
FLT3LG	0.268705	2.45176e-27
STK39	0.267701	1.78619e-28
VSIR	0.267479	1.71664e-22
REL	0.267306	4.62871e-22
EPB41	0.267293	2.4209e-20
ASXL1	0.267282	2.08693e-18
NR4A2	0.267225	1.99367e-05
ARID2	0.263587	9.00277e-22
NABP1	0.263101	4.78197e-10
GLCCI1	0.262515	4.76734e-27
MIR222HG	0.262036	2.05849e-16
KDM2B	0.261802	6.66878e-17
UBE2S	0.260325	5.1814e-14
CKS2	0.259906	8.77935e-08
FMNL1	0.258763	4.20531e-18
IFFO2	0.258456	1.01164e-22
NFATC3	0.257951	4.21378e-20
ABLIM1	0.257694	1.11141e-19
DR1	0.25731	5.04303e-19
PBXIP1	0.25722	1.13706e-24
SEMA4D	0.256914	1.53257e-20
TSEN34	0.255942	1.4385e-23
DRAP1	0.255109	8.80651e-17
RUNX1	0.254968	2.22025e-12
INSIG1	0.25479	2.41441e-11
CDR2	0.253724	3.15168e-17
CGAS	0.253341	4.25884e-14
PDCD4	0.252954	1.38787e-10
SIPA1	0.252869	4.17192e-23
EZH2	0.251974	1.44694e-21
LINC00861	0.251961	3.20699e-14
RFTN1	0.251626	1.8478e-16
DNAJB6	0.251517	3.94597e-13
KHDRBS1	0.251072	4.74131e-15
GTDC1	0.250415	7.41169e-19
PPP1R14B	0.250404	3.66754e-21
MAP4	0.250344	1.43187e-27
S1PR4	0.249859	2.06115e-29
MBNL2	0.24963	2.85623e-13
GNB2	0.249361	2.25282e-14
GNG2	0.248927	1.01946e-09
KLF12	0.248714	2.57752e-18
SHISA5	0.248243	1.3565e-17
ZFAND3	0.247003	1.77032e-17
HSPA4	0.246237	2.38681e-20
ATM	0.246195	2.51952e-17
SUN2	0.24581	1.50021e-14
APMAP	0.24536	4.3432e-19
PHACTR2	0.24524	1.40396e-17
ICAM1	0.244644	3.41024e-11
TRPC4AP	0.244119	4.13122e-19
RBCK1	0.243982	1.23412e-22
GNAS	0.243024	2.41892e-30
NAB1	0.242739	3.98912e-25
PRKD2	0.242224	1.59117e-20
GATA3	0.242188	6.33335e-15
ZNF217	0.24187	8.37012e-18
APOBEC3C	0.24185	1.18112e-27
PITPNC1	0.241367	5.5665e-11
MRTFA	0.241059	4.15176e-26
NEAT1	0.240972	7.7343e-30
REV3L	0.24091	2.71841e-15
DIAPH1	0.240291	7.35712e-16
ANK3	0.240014	4.37914e-12
GIMAP1	0.239544	8.40262e-25
CSK	0.239331	1.11234e-19
GLUD1	0.238894	2.53498e-12
TRAF5	0.23862	4.86356e-33
MAML2	0.238397	3.60887e-16
GYG1	0.237361	2.56492e-25
ARID4B	0.237333	2.0587e-16
YWHAH	0.236592	4.94649e-13
ATP6V1A	0.236081	1.6302e-24
PPP3CC	0.234838	1.03056e-11
MYADM	0.234486	4.99003e-06
KIF21A	0.234119	7.97497e-17
PRKY	0.232814	5.50094e-14
ZAP70	0.231953	2.34159e-20
CFL1	0.231835	1.60725e-15
SLFN12L	0.231574	7.23391e-19
RHOG	0.231493	2.88148e-10
SNRPA	0.231281	2.00894e-17
KDM2A	0.230657	2.88212e-13
TIGIT	0.230302	1.63787e-17
TMEM238	0.228858	8.4548e-20
PLCG1	0.228479	8.87477e-16
RIPOR2	0.227365	3.10153e-17
SYNE2	0.226979	3.68103e-13
SELPLG	0.226856	5.62411e-08
SNX5	0.226653	1.14103e-23
MIR155HG	0.224929	7.54096e-16
RTN4	0.224848	8.03059e-15
TTC39C	0.224337	1.07867e-13
SUPT3H	0.224279	1.87715e-22
RBM14	0.223545	6.72883e-21
TAF10	0.223405	1.50576e-19
CCDC18-AS1	0.223023	1.18674e-18
GRK5	0.222432	5.1442e-12
PSMB9	0.22203	6.62925e-17
JARID2	0.221944	8.96695e-11
AKT3	0.221361	3.0035e-09
SGMS1	0.221219	1.79375e-25
CSTB	0.22118	6.98055e-16
KIF21B	0.221119	9.56295e-12
HLA-E	0.221086	2.67624e-35
VCP	0.221044	1.27785e-20
TBC1D2B	0.220875	3.86976e-23
USP25	0.220515	1.06999e-13
LSM2	0.219997	6.47e-20
GRAP2	0.219938	1.24565e-11
RABGEF1	0.219542	1.33893e-14
CD3D	0.21891	3.07876e-15
DOCK8	0.218817	4.34461e-16
AP2B1	0.218802	9.66565e-17
TLN1	0.21856	1.98282e-11
USP3	0.218359	5.79817e-14
HCP5	0.218033	1.1828e-21
ORAI1	0.217585	2.60413e-11
FCMR	0.217534	8.47297e-13
TUT7	0.217336	5.47309e-14
PARVG	0.216459	1.05125e-14
LTB	0.215987	0.000681177
ATG2A	0.215635	5.70667e-14
SLC20A1	0.215464	1.30312e-08
BLOC1S1	0.215387	1.0715e-14
CAPZB	0.215356	3.01347e-10
ZBTB7A	0.215122	5.85569e-20
LPXN	0.214245	7.86068e-11
FAM110A	0.213871	8.76392e-12
RALGAPA1	0.213668	5.91884e-09
APRT	0.213581	1.25482e-13
ANXA2	0.213332	7.64181e-11
CLK1	0.213259	0.000220074
PIK3CG	0.212985	3.14017e-20
ARPC1B	0.212357	2.82841e-18
ADA	0.212057	1.9726e-22
RBBP6	0.211829	1.95252e-09
ZBTB11	0.211756	7.27538e-13
SH3BGRL	0.211061	1.98e-18
SLF1	0.211012	4.17134e-21
LASP1	0.20992	4.04836e-20
SF3A2	0.209872	4.49809e-17
ABHD17A	0.209673	5.2902e-15
ASAP1	0.209441	8.71831e-11
ABCC1	0.209107	3.89987e-09
PLEK	0.208644	2.60357e-14
ATP5PB	0.208242	3.12422e-11
SMS	0.208094	1.08785e-12
MAP7D1	0.208091	1.49638e-16
SLBP	0.208071	7.91365e-10
GMFG	0.207839	8.05153e-11
MSL1	0.207598	1.41199e-17
CPSF6	0.207559	9.33722e-19
ICAM3	0.207412	1.64494e-09
BIN1	0.207304	1.51315e-10
EVL	0.207037	9.13558e-20
PKM	0.206141	4.71933e-06
GFOD1	0.20609	9.33577e-16
AHR	0.205703	1.3713e-09
PARP1	0.205222	4.08718e-16
UBTF	0.204747	2.31389e-16
XPR1	0.204729	2.95221e-15
RPL29	0.204335	9.60164e-47
MYO1F	0.204054	2.77381e-15
PCED1B	0.204042	4.29293e-13
NEDD9	0.20305	7.7771e-08
CIB1	0.202964	1.07667e-11
NCOA1	0.202668	2.8814e-11
MYCBP2	0.202208	3.40986e-09
MOB3A	0.202082	9.66328e-16
TPP1	0.201932	1.45424e-16
TMEM109	0.201635	1.04497e-08
PSME4	0.201503	2.3344e-09
MAN1A1	0.201455	1.0447e-12
EXOSC9	0.200859	6.86493e-21
PSAP	0.200692	9.0675e-11
P4HA1	0.200047	1.58384e-08
NUSAP1	0.199589	1.29732e-14
BABAM2	0.199397	3.99743e-14
UBE2L6	0.199345	1.11944e-11
LAMTOR4	0.198795	1.57151e-12
RASAL3	0.198607	1.38679e-14
NUFIP2	0.198557	2.91572e-10
KDM4C	0.198008	2.17362e-10
TPM3	0.197533	7.54655e-13
YES1	0.196966	8.35249e-11
PLAAT3	0.196829	7.03914e-11
IL16	0.19679	4.39629e-12
USP24	0.196725	1.01942e-07
NCOR2	0.196347	4.0961e-13
ZNRD2	0.196254	3.01893e-15
SYNRG	0.19596	4.25738e-10
MBP	0.195695	3.53512e-11
FDFT1	0.195048	9.78492e-26
CD28	0.194929	2.21086e-16
GPCPD1	0.1948	8.30994e-07
ANXA5	0.194575	4.40942e-06
CARD11	0.194535	1.275e-08
ATP2A3	0.194513	2.93945e-11
PGAM1	0.194188	1.8404e-10
LBR	0.193534	5.57641e-13
TBRG1	0.193042	3.86058e-11
PDE3B	0.192575	8.70184e-27
MYLIP	0.192459	4.693e-07
EIF3L	0.191965	2.48471e-12
N4BP1	0.191143	7.1801e-14
TRAF3	0.190727	2.98646e-09
MFSD11	0.190539	1.59472e-11
RNF167	0.190335	6.70159e-13
EEF1D	0.19032	2.70726e-25
RC3H1	0.190203	7.01401e-13
CPT1A	0.190075	3.47799e-18
AFF4	0.189962	1.39354e-10
SPATA13	0.189804	1.86288e-11
RPS9	0.189795	2.87797e-34
ABHD14B	0.189616	1.16773e-12
CCNY	0.189557	9.84871e-07
PSTPIP1	0.189542	2.28804e-10
RASSF3	0.189373	7.53234e-11
DNAJC1	0.188624	4.55246e-12
NFKBID	0.188046	1.05653e-14
ZCCHC7	0.187991	1.97171e-11
SPEN	0.187942	9.20505e-10
RABEP1	0.187603	6.42615e-08
ARID1B	0.187422	6.5688e-10
CDKN1B	0.18735	1.48083e-09
ITPKB	0.187178	6.09673e-09
KRAS	0.187059	7.6769e-10
RPLP0	0.18683	4.97503e-15
HAVCR2	0.186308	1.47175e-09
FBXW7	0.186268	7.77642e-14
TRIM69	0.185536	1.7944e-11
GSK3B	0.185384	1.2736e-12
PLCXD2	0.185305	3.33457e-17
STIM1	0.185226	4.85302e-15
ZNF644	0.184926	1.83069e-08
WDR1	0.18449	1.53353e-16
ARID5B	0.184302	5.64418e-08
NUDT4	0.184153	1.94408e-09
KMT2A	0.183995	2.31044e-07
F2R	0.183629	4.77844e-11
REX1BD	0.18314	5.90051e-08
OXSR1	0.18283	1.17914e-11
COG5	0.182739	2.2383e-10
VPS37B	0.182699	2.99442e-05
SEL1L3	0.182589	1.05968e-13
CBLB	0.182578	5.39543e-19
CNPPD1	0.182445	2.30053e-10
AHSA1	0.182064	3.01309e-08
PRDM2	0.181502	5.34064e-10
SOD1	0.181498	0.0262143
PPP1R35	0.181313	3.26757e-10
CCNI	0.181215	5.01987e-08
STK10	0.181024	8.20367e-09
TNFRSF1B	0.180585	5.63462e-09
SLC2A4RG	0.180044	1.01694e-11
DCP2	0.179828	3.4463e-13
USP9X	0.179808	8.9817e-10
TMEM165	0.179359	2.34992e-18
CHCHD10	0.179192	2.87449e-09
PTDSS1	0.178849	1.81828e-09
MEF2D	0.178533	1.617e-08
SLC9A3R1	0.178233	1.88621e-07
DAXX	0.17814	3.346e-09
CKAP2	0.177925	1.86332e-16
PIAS1	0.177925	6.04956e-08
MATR3.1	0.17773	1.0382e-14
ELL	0.177526	3.43778e-15
COA1	0.177242	1.38669e-13
NUP210	0.177102	2.27981e-12
GBP1	0.177035	1.30237e-12
OSBPL3	0.176757	4.63505e-07
KMT2C	0.176732	1.43132e-09
TSEN54	0.176217	1.326e-14
SIAH2	0.176025	1.6372e-08
JUN	0.17589	0.00350586
WEE1	0.175664	5.74496e-12
PRKCQ	0.17562	2.36407e-09
PIK3AP1	0.175602	4.80324e-07
DGKZ	0.17535	3.31923e-10
GPSM3	0.175123	4.79634e-11
PHIP	0.174956	8.44683e-07
CEP85L	0.1748	2.6772e-11
TSTD1	0.174538	1.14861e-09
ANP32B	0.17423	7.48447e-07
SLFN5	0.17395	5.66306e-11
TRAPPC1	0.173636	8.20346e-05
ANKRD13D	0.173581	2.38496e-13
HCLS1	0.173558	1.14824e-11
REST	0.173525	3.79643e-13
PPM1G	0.172572	7.18874e-09
PTGES3	0.172402	1.03583e-05
TBCD	0.172316	1.66789e-18
CSNK2B	0.17227	1.03125e-07
SRSF7	0.172203	9.84681e-05
NT5C3A	0.17173	8.76592e-10
SNRK	0.171064	1.80615e-13
PPM1B	0.170959	3.59324e-11
TPI1	0.170827	1.56016e-05
MAP3K5	0.170734	1.15896e-07
YWHAQ	0.170021	4.22429e-07
EIF2AK3	0.169594	2.15436e-10
PYHIN1	0.169446	1.83402e-13
CASP1	0.169076	1.35445e-14
RALY	0.169007	1.83691e-07
DENND1C	0.168472	2.06549e-10
ADGRE5	0.168264	0.0284032
GMDS	0.168071	1.08905e-08
PEA15	0.167843	2.00302e-08
USP22	0.167691	1.22667e-11
R3HDM4	0.167529	5.68671e-06
NELFCD	0.167241	7.20163e-09
SERTAD2	0.166925	6.22746e-18
C9orf16	0.166705	9.67556e-11
IFI30	0.166212	0.0111975
MAP2K2	0.166187	6.87666e-09
TBL1X	0.165992	0.0030944
KLRC4	0.165927	0.0051544
BST2	0.165666	6.74941e-11
WASF2	0.165623	9.59505e-09
OTUB1	0.165434	1.20544e-06
PPP2R1A	0.165409	5.53242e-06
ISG15	0.165407	0.00965089
WAS	0.165247	6.32382e-10
RFFL	0.165123	3.92636e-11
FAM117A	0.165037	0.000318457
MAP4K4	0.16486	1.9413e-10
MCOLN2	0.164435	2.51685e-11
RPL28	0.16395	2.60094e-47
IGFLR1	0.163876	4.82875e-12
LPP	0.163708	2.09286e-06
EED	0.163526	5.69918e-16
HDGF	0.163497	2.03364e-09
SDHA	0.163496	2.73628e-12
KPNA2	0.162757	3.0654e-06
DDIT4-AS1	0.162724	0.00020669
XPO1	0.162467	3.82246e-09
ARHGAP30	0.162389	0.00030687
TPST2	0.162185	1.62135e-07
OXA1L	0.161629	1.14591e-11
CLASP2	0.161578	1.33818e-07
RPS3A	0.161336	4.40651e-39
FAM53B	0.160996	5.69748e-07
RACK1	0.160955	3.9318e-20
SIPA1L1	0.160921	0.00112847
KIAA0232	0.160872	7.21815e-11
ASXL2	0.160761	1.43257e-11
SH3BP1	0.160696	2.075e-06
MAP4K1	0.160109	3.71762e-07
SP110	0.159886	5.42163e-06
FOXO3	0.159684	6.35457e-08
VPS36	0.159134	2.01584e-07
LY9	0.159051	1.01839e-11
SERTAD1	0.158469	0.0105263
RANBP2	0.158454	0.00400736
PPM1D	0.158438	2.71739e-10
TMEM120B	0.158239	3.10435e-12
PIK3CD	0.158103	0.000501334
POLR2E	0.157962	0.000370675
SYNM	0.157952	1.30622e-09
SFI1	0.157926	2.1663e-17
TNF	0.157916	0.0381451
CUTA	0.157863	1.33963e-10
SSBP4	0.157642	5.78082e-10
HMGCS1	0.157565	1.02588e-11
HSD17B7	0.157493	5.59064e-16
SLC25A25	0.157092	2.36691e-10
RNF38	0.15704	3.44792e-15
SAMD3	0.157015	3.04291e-10
SP140L	0.156582	2.10598e-13
RNPEPL1	0.156501	3.00254e-08
TMPO	0.156451	5.31141e-07
NBEAL1	0.155952	1.69258e-08
SENP7	0.155835	3.9636e-07
PTTG1	0.15554	9.69952e-08
CLIC3	0.155312	3.11227e-12
TMEM181	0.155282	1.31641e-12
SF3A1	0.15461	2.3005e-06
SETD2	0.154606	5.39942e-05
SRSF10	0.153985	2.48703e-05
PPP6R1	0.153971	1.55919e-06
SETD5	0.153576	5.94084e-07
GPR132	0.153561	2.524e-11
RNF168	0.153172	0.000227885
PPP1R12A	0.153077	3.75384e-08
PRRC2B	0.152469	2.15454e-08
FAM160B1	0.151898	3.13498e-07
FAM111A	0.151894	8.14737e-14
PAF1	0.151739	1.95434e-07
FIS1	0.151534	2.48603e-14
COX6B1	0.151127	0.0223541
GRK6	0.150872	7.18419e-07
MIS18BP1	0.150744	6.7868e-09
HIST1H3D	0.150439	9.8711e-05
NUMB	0.150116	1.46533e-17
OGDH	0.149605	1.82851e-08
UBR2	0.149567	2.1154e-07
PAXX	0.149461	1.50092e-15
MAT2B	0.14946	0.000256746
BAK1	0.149154	1.23141e-09
UBE2R2	0.148683	4.55017e-05
ZNF581	0.147785	5.44047e-07
ZEB2	0.147615	0.00829713
ATP5F1B	0.147579	0.00783796
MPHOSPH8	0.147154	3.68917e-08
PRPF40A	0.146791	3.05341e-07
NCOR1	0.146761	1.4905e-07
TGOLN2	0.146274	6.64788e-06
FAM214A	0.146265	2.00974e-09
RCSD1	0.145994	5.76227e-06
KDM3A	0.145695	1.25565e-05
C12orf75	0.14566	8.85391e-07
ENC1	0.14532	0.000186836
ABI1	0.145281	1.25797e-05
DAZAP2	0.145142	2.5241e-08
SLC4A7	0.145023	0.000147909
TSPO	0.144993	3.88403e-08
JAZF1	0.144791	0.000160833
ZBTB38	0.144737	0.000157555
WBP2	0.144538	0.00134528
RAB1B	0.144406	0.000315083
TRANK1	0.144395	2.54616e-10
SYNGR2	0.144192	0.00163863
EFCAB14	0.144103	0.0130186
SMARCA4	0.143722	1.47595e-12
TOR1AIP1	0.143436	7.28343e-13
MCUB	0.142331	2.33949e-06
USP47	0.14222	0.000136293
CALCOCO2	0.142117	2.77431e-09
ERICH1	0.142097	3.1537e-08
PNKP	0.141938	9.39554e-13
RHOA	0.141897	0.000217709
KCTD20	0.141834	1.29009e-07
SERINC1	0.141613	0.00114753
NOP58	0.141609	0.00206551
TACC1	0.141335	1.57959e-08
CASP4	0.141029	2.17876e-13
TMUB1	0.140515	4.79535e-05
CTNNAL1	0.140356	0.00714855
TAF7	0.140331	0.000405413
HPCAL1	0.140143	4.93927e-07
ATP2C1	0.140058	2.32001e-06
JOSD1	0.140018	1.69123e-05
PPA1	0.139885	0.00171609
RMND5A	0.139686	2.30365e-05
SNRPD2	0.139356	2.29535e-09
PSME2	0.139217	0.037373
CTSB	0.139047	0.000925944
CDK12	0.138883	2.9591e-05
RARA	0.138521	0.000205646
BORCS5	0.138295	1.3067e-18
COMMD7	0.138088	2.43964e-09
SRPK1	0.138071	2.60876e-05
ERGIC3	0.137901	3.97808e-10
USP15	0.137856	0.000297976
GRAMD1A	0.137848	3.84744e-06
GBP4	0.137828	0.00164766
VOPP1	0.137768	1.52688e-14
PDLIM2	0.137666	1.58713e-14
IGBP1	0.137603	4.23786e-10
CMTM3	0.137349	1.66471e-05
HIST1H2BN	0.137133	0.000278156
RPS8	0.137106	2.94856e-32
FXYD5	0.136868	0.0143109
EFHD2	0.136065	2.47921e-05
BCL2	0.135959	0.000654882
TWF2	0.135867	5.5764e-06
BTN3A3	0.135865	7.68962e-11
TANK	0.135752	0.00103632
RAB6A	0.135705	0.000497206
LRCH3	0.135186	2.8418e-10
TOB2	0.135175	7.6602e-05
FRYL	0.135111	2.20861e-07
NAA50	0.134871	1.40734e-12
STX6	0.134206	5.2309e-08
UBAC2	0.13419	3.72311e-06
CHST12	0.134139	7.39555e-06
VASP	0.134005	7.59762e-08
GXYLT1	0.133754	1.0297e-09
YY1	0.133699	0.000238109
GPR137B	0.133307	0.00172104
MBD5	0.13302	1.46707e-09
OGFR	0.132811	9.42975e-12
ATP2A2	0.132783	0.0417272
TOPORS	0.132381	2.20083e-08
CRTC3	0.131772	3.65223e-15
ATP5F1A	0.131694	1.49475e-07
RALGDS	0.131607	8.73492e-07
BACH1	0.131241	4.22081e-07
FAM102B	0.131127	0.000143151
CTSS	0.130658	1.56796e-09
EGLN2	0.130225	1.70547e-06
CENPC	0.129718	0.045492
CBX4	0.129683	3.49964e-06
LARP1	0.129451	1.058e-06
HMGB2	0.128704	1.03264e-07
POLR2A	0.128154	1.90624e-07
TCF12	0.128111	0.00151495
ZC3H12D	0.128108	1.61196e-10
ARHGDIB	0.127675	0.00055684
FKBP8	0.127325	0.000337151
ALKBH7	0.127303	1.32113e-06
GDI2	0.127238	5.53459e-06
MED15	0.127181	4.48419e-10
ZCCHC8	0.126969	1.45813e-07
MEX3C	0.12671	1.74905e-07
FOXO1	0.126619	2.02458e-09
MZT2B	0.126359	3.71983e-05
SREBF2	0.126323	0.00754558
ENSA	0.126065	0.000190074
IGF2R	0.125876	1.34508e-05
SELENOW	0.125713	0.0056671
UVRAG	0.125708	0.0283926
NBEAL2	0.125383	3.71969e-06
SINHCAF	0.12537	0.00174777
CAPN2	0.125049	0.000619122
COX5A	0.125039	0.00138485
DYRK1A	0.125002	0.000553399
CAPNS1	0.12491	3.13511e-05
IL10RA	0.124825	0.000691169
GPI	0.124578	0.031871
LRMP	0.124546	0.00078984
VPS28	0.124373	1.65097e-09
TCIRG1	0.124053	0.000116722
GRB2	0.12394	2.03703e-06
GPRIN3	0.123556	6.98079e-06
CPNE3	0.123346	0.000117458
PRMT1	0.123302	0.00144172
CPNE1	0.123258	8.0123e-10
DENND4C	0.122883	0.000302845
KDM5A	0.122809	0.00104713
EEF1G	0.122767	2.41974e-07
MKLN1	0.122744	0.000263096
AC008105.3	0.122727	8.23269e-08
ATRX	0.122492	0.0421647
RNASET2	0.122197	1.45947e-06
MXD4	0.122103	8.51215e-12
KIAA2026	0.122063	0.000318992
ZDHHC20	0.122043	0.0383579
LINC00513	0.121902	5.97111e-07
TAP2	0.121566	0.00612947
ST8SIA4	0.121433	6.68327e-07
AIP	0.121346	0.000630285
HAUS3	0.120693	1.16066e-05
NONO	0.120167	0.000397665
CYBC1	0.120144	6.38571e-09
NAA10	0.12007	9.03359e-07
SNAP23	0.120035	0.0320701
SACM1L	0.119629	0.00012847
TRAPPC10	0.119455	0.0188142
AAK1	0.119376	5.25354e-06
AGTPBP1	0.118388	0.00128163
FBXO11	0.118058	0.000134715
MCTP2	0.117982	0.00519516
ALKBH5	0.117954	0.00132918
BZW2	0.117358	3.97799e-06
NUTM2B-AS1	0.11719	4.84337e-10
NSD2	0.117161	6.97874e-08
ARHGAP45	0.117133	9.86046e-09
NFATC1	0.117074	0.000155554
B4GALT1	0.117063	0.00839788
HIF1A	0.116922	0.00544641
AGO2	0.116902	0.000216095
TP53INP1	0.116551	0.014007
LCP2	0.116402	0.00045528
RPL7A	0.116355	6.85815e-13
VPS13C	0.116014	0.00470746
UBAP1	0.115701	2.1561e-06
SCAMP2	0.115451	7.611e-06
RPS14	0.11543	6.14324e-18
MED29	0.115108	0.00461258
BTN3A2	0.115092	3.38971e-11
UHRF2	0.11495	4.17189e-07
PSMB8	0.114839	4.51439e-05
OXCT1	0.114789	0.0119519
FYN	0.114483	0.00803214
CRLF3	0.114408	6.16723e-06
LIMA1	0.114405	8.78199e-07
MAT2A	0.11418	0.00201292
NAA16	0.114105	0.000531755
RAPGEF1	0.113923	3.01861e-06
POLR2G	0.11369	0.000217921
NRBP1	0.113192	0.0296031
ILK	0.11314	0.000300961
JMY	0.112986	0.00244311
RPL19	0.1129	4.64815e-18
ARPC5	0.111907	0.0153703
CCDC88C	0.111633	0.0128423
SMARCA5	0.11157	0.00331258
TMEM219	0.111032	8.21153e-05
KAT6A	0.110969	2.44293e-05
PIN1	0.110621	4.28969e-10
PPTC7	0.11044	0.0197142
PLK3	0.110289	1.96045e-11
OAZ1	0.10996	3.87384e-06
ZNFX1	0.10973	0.0182984
TGIF2	0.109435	0.0131152
ARHGEF2	0.109126	0.00890479
RPL3	0.109045	1.32232e-14
ZNF131	0.108762	2.36831e-06
HADHA	0.108175	0.00301571
TOP2B	0.107891	0.0278802
ARHGEF3	0.107783	0.00635589
NPC1	0.107513	0.00018698
HERC4	0.107358	1.22157e-07
CCM2	0.107263	4.85416e-07
IWS1	0.107114	1.33424e-06
USP42	0.106924	2.42077e-06
MZT2A	0.106116	0.000186084
MAP4K5	0.10563	9.73694e-06
GSDMD	0.105481	3.90323e-10
RCOR1	0.105435	0.000310423
CLSTN3	0.105256	0.00156653
HIVEP1	0.105178	7.10373e-06
ETNK1	0.10517	0.00223269
RAB7A	0.105044	2.45736e-05
CTR9	0.104973	0.000160199
OTUD4	0.104754	1.90176e-05
TPP2	0.104515	7.03152e-06
IQGAP1	0.104407	3.68602e-14
POM121	0.104333	0.00219656
DCAF5	0.104245	0.00386698
STK38	0.103948	6.46505e-07
PHB2	0.10378	0.000324893
RNF111	0.103523	3.95712e-05
THRAP3	0.103523	0.0129573
PHYKPL	0.103451	3.12405e-05
ATG16L1	0.103419	0.000748979
IRF2	0.10306	0.000134325
LDLRAD4	0.102908	5.3737e-06
HBS1L	0.102331	5.40164e-06
ETHE1	0.102191	4.40137e-06
EWSR1	0.102139	0.00166239
NDUFV1	0.101517	0.026745
ZBTB25	0.100812	0.00501907
GLG1	0.10072	4.7476e-07
ABHD17B	0.0999849	0.00817245
CD58	0.099917	7.76919e-05
ARHGAP17	0.0999127	0.0105484
NCKAP1L	0.099534	0.000311954
RPL13	0.0991173	5.61552e-15
UBR5	0.0989372	4.0197e-05
FOXK1	0.0985099	5.68792e-06
RBIS	0.0982641	0.0190618
FGD3	0.0976523	2.07918e-07
EIF3A	0.0975385	0.00295463
MRPL54	0.0974727	1.72795e-07
GNB5	0.0972237	0.00249669
TAOK3	0.0970451	8.94119e-05
PPP1CC	0.0970307	1.2644e-05
ARHGAP9	0.0966416	7.19872e-05
CYP51A1	0.0962878	0.00111476
STRN	0.0956723	0.00572791
CARD8	0.0956142	4.44271e-06
FBXO33	0.0954736	0.000130949
LIMS1	0.0953036	7.29869e-07
EHBP1L1	0.0949155	2.55261e-07
RPL4	0.0947041	0.00591696
GRSF1	0.0945145	1.61407e-05
SEM1	0.0941351	0.00232439
MTA2	0.0941114	0.0169618
MTPN	0.0939483	0.000630332
PRDX5	0.0936684	0.00116588
TRERF1	0.0934103	2.42914e-05
YWHAG	0.0930798	0.00383653
ARID1A	0.0923533	0.000394373
ADNP	0.0918367	0.000254079
KCNA3	0.091739	9.69669e-06
TOP1	0.0916701	0.0419302
RNF149	0.0915225	4.02146e-05
CCDC88B	0.0912335	1.09678e-06
DDAH2	0.0910066	2.82096e-07
IP6K2	0.0904867	2.95047e-06
GIMAP2	0.0901341	0.000903983
NUDCD2	0.0900891	0.000154884
FAM126B	0.0899775	0.0156518
DGKD	0.0899451	0.0107681
TBL1XR1	0.0897484	0.00219222
ARMCX6	0.0896903	0.000377586
WDR26	0.0894713	0.0493514
ODF2L	0.0894243	3.0613e-05
CXCR3	0.0893708	4.6249e-05
ERBIN	0.0892993	0.00905048
LMNB1	0.0892234	0.00125154
PICALM	0.0891409	0.00594773
SPPL3	0.089005	1.85091e-05
PREX1	0.0885965	3.065e-06
PTOV1	0.088318	4.00079e-05
SEPTIN11	0.0883138	0.0111085
DAAM1	0.0883062	9.45781e-05
NAA38	0.0882528	2.63588e-07
RBM15	0.0876718	6.97543e-07
SLC16A1	0.0876113	0.000384335
RPL18A	0.087596	1.14069e-05
JAK3	0.0874846	0.000292371
ATP5PD	0.0874391	0.00518988
BORCS6	0.0873595	0.0307676
LPCAT4	0.0872863	3.42155e-06
CCDC85B	0.0872497	0.0137252
MDH2	0.0869876	0.00061327
RELT	0.0868703	0.00300361
MIER1	0.086516	0.0241496
DUSP10	0.0864856	0.0194778
NUDT21	0.0862256	0.0162369
MCM6	0.0860876	0.00165603
AOAH	0.0856914	0.000122947
GDI1	0.085303	0.0131061
BTAF1	0.0847386	3.889e-11
TMEM140	0.0835085	1.5826e-07
CNIH1	0.0828465	8.55077e-09
MSL2	0.0827915	0.00189929
PCED1B-AS1	0.0824018	0.0110214
GMCL1	0.0822302	0.0179054
FBXO7	0.0821291	0.00195321
YY1AP1	0.0820317	0.00907585
SLC25A33	0.0814624	0.000497885
NR3C1	0.0814246	2.56241e-07
RPL12	0.0810723	0.00227065
TAF15	0.0809975	2.14272e-08
FAM104A	0.080888	0.0361081
C1orf21	0.0806469	3.92864e-05
CEP57	0.0797424	0.00341547
WIPF1	0.0789526	0.00142609
INPP4A	0.0785947	1.20113e-11
BANP	0.078568	2.28383e-06
EMB	0.0776339	0.0280614
KANSL2	0.0772018	0.00585996
GLIPR1	0.0766818	8.92797e-05
RAP2B	0.0765297	0.00573992
HIST1H1C	0.0764772	2.73489e-09
ELOA	0.0763455	1.35396e-05
SLMAP	0.0760969	0.00986566
ATP6V0D1	0.0754636	0.00162102
TMEM256	0.0752347	6.53274e-09
MARK2	0.0750447	0.000123178
ATP2B4	0.0745936	1.85754e-20
PML	0.0744826	0.0164863
SYTL1	0.074197	0.000401456
RGS10	0.074052	8.03853e-06
CUL3	0.0740049	0.000158494
ZNF638	0.0739057	0.000324822
ARHGAP35	0.0738039	0.00191483
OTULIN	0.0734715	0.036711
MSL3	0.0719358	2.49756e-05
NUP153	0.0715609	8.88341e-06
CDK13	0.0712228	0.0149206
TSC22D4	0.0706902	0.00213619
RSF1	0.0706556	1.46381e-07
CRKL	0.0703051	0.00333069
MYO1G	0.0700654	0.00187323
CHD9	0.0698184	0.0132353
CCNT2	0.069748	0.0146781
EIF4G2	0.0691951	0.0211292
ACIN1	0.0691645	4.94376e-05
FBRS	0.0687679	0.000514328
CBX3	0.0672711	0.000302906
DNAJC15	0.0668275	4.14347e-05
UXT	0.066767	0.000176708
ING2	0.066304	0.000154188
PLEKHO1	0.0662118	0.0481987
SF3B2	0.0658533	0.000236996
PARK7	0.0657254	0.0430205
DNM2	0.0654971	0.000226859
DCTN3	0.0654076	0.00922345
BSDC1	0.0648636	1.65309e-05
CERT1	0.0648052	0.0072092
SENP6	0.0646735	0.0478726
ACSL4	0.0644727	0.0249922
VAMP5	0.0643846	4.01669e-05
CACUL1	0.0642129	0.049063
WDR83OS	0.0641133	0.00231922
CHURC1	0.0639765	2.99737e-08
ZFAND2B	0.0635331	2.82951e-06
SPN	0.0632605	9.64998e-06
LMBR1	0.0629819	0.000101847
TNKS2	0.0625998	0.00983697
NUTM2A-AS1	0.0624283	2.35483e-06
HABP4	0.0624162	0.00283596
EIF4E3	0.0618261	0.00930461
SEPTIN2	0.0616395	0.00109326
BIRC6	0.0615646	0.0262734
PHF21A	0.0615493	0.00293118
TRIM8	0.0614667	0.00462542
ATP6V1H	0.0610898	0.0406664
AHI1	0.0607524	0.00213635
PGLS	0.0606967	0.000326077
NPEPPS	0.0605703	1.09535e-07
IFI27L2	0.0604203	0.000164497
SMARCC2	0.0604057	0.00103848
PLEKHA2	0.059767	0.00585329
CCDC32	0.0590709	9.39796e-07
RPL10	0.0590101	6.97593e-05
HLA-DQA2	0.0588876	6.29217e-34
KLF13	0.0587215	6.44674e-05
NDUFS8	0.0580874	0.0235709
USP36	0.0576601	0.0203705
FTX	0.0575591	0.000952466
LARP4B	0.0573714	0.000229635
KIAA1109	0.056697	0.0479722
R3HDM2	0.0564604	0.000135385
MAP3K2	0.0564451	1.02181e-05
STK24	0.056444	3.66898e-06
MRPS12	0.0560316	7.13884e-05
RDX	0.0559153	0.00470656
ANKRD36C	0.0558749	0.000554856
RAP1GDS1	0.055687	0.000323729
PKN1	0.0548917	0.0148782
PPP2R5A	0.0534089	0.0223433
LAMTOR5	0.0528775	7.48029e-05
HCG18	0.052683	0.00383637
HP1BP3	0.0523067	0.000134128
ATP13A3	0.0522591	8.45925e-07
IQSEC1	0.0516348	0.00518866
CDC42SE1	0.0511811	1.38254e-07
STK26	0.0511636	0.026704
CD8B	0.0507642	3.37108e-08
RAB11FIP1	0.0502228	1.68066e-07
UBE2N	-0.0506633	0.0109826
UBE2K	-0.0514953	0.00735109
ENTPD4	-0.0528802	0.000447083
MED10	-0.0535251	0.00188698
PSMA6	-0.0548771	0.016054
BDP1	-0.0561681	0.00696176
PSMG2	-0.0567943	0.00993361
CHTOP	-0.0581505	0.0384365
UQCRFS1	-0.058295	0.000629449
ANKHD1	-0.0585827	0.0369914
FAM50A	-0.0597642	4.02217e-05
AKIRIN2	-0.0604199	0.00476019
SNW1	-0.060505	0.000354962
TRMT112	-0.0618178	0.00651728
TRAT1	-0.0621569	3.01343e-11
FAU	-0.062175	0.0051949
RTRAF	-0.0625255	0.00340871
RPL31	-0.0646915	1.24483e-25
REEP5	-0.0651206	0.00868761
PDCD6	-0.0666154	0.00786291
SNRPF	-0.0670617	0.000494762
RPL13A	-0.0682984	0.000173745
HIST1H1E	-0.0683896	1.91268e-18
DDX24	-0.0685806	0.00538114
RB1CC1	-0.069183	0.0275457
RAB14	-0.0700704	0.0125525
2024-03-05	-0.071281	0.00813132
SUGP2	-0.0713519	0.0372378
ATP5MPL	-0.0713895	0.000272551
RASA3	-0.0720974	2.8778e-05
TXNL1	-0.0722927	0.000172134
PHF3	-0.0727501	0.00317567
ANKRD12	-0.0741909	0.000539975
ICE1	-0.0754569	0.00134115
CHMP4A	-0.0762026	0.0203985
ACP1	-0.0762128	0.000715996
MAF1	-0.0767757	0.0421134
PELI1	-0.076835	3.78471e-21
TRIM22	-0.0769564	1.09145e-05
KLHDC2	-0.077049	0.00518664
PIGT	-0.0771898	0.00776227
RPS3	-0.0775964	1.21202e-05
SNRNP200	-0.0777445	0.00864457
PDE4D	-0.0780721	0.00171054
ZBED4	-0.0793518	0.000118797
CCNDBP1	-0.0794198	0.00172566
TTC14	-0.0813646	0.037574
ARL8B	-0.0821175	0.00186242
IRAK1	-0.082243	0.00153107
CHMP1B	-0.0826355	0.0220808
IDI1	-0.0831609	0.0148972
VAMP2	-0.0835351	0.0303276
BRD2	-0.0850398	0.00881748
NDUFA10	-0.0856705	0.000149817
UNC45A	-0.086185	0.00354191
GLTP	-0.0877877	0.000135421
SNRPD1	-0.0884692	0.0178483
SRP72	-0.0888574	0.000915723
TALDO1	-0.0892089	5.76642e-05
MAX	-0.0899766	0.0431419
RHBDF2	-0.0905137	0.00519621
CSNK1E	-0.0919961	0.0102681
RPL5	-0.0924618	0.0460654
CCND3	-0.0926218	0.0175364
NDUFS5	-0.0927137	3.32209e-07
NEDD8	-0.0929885	2.27162e-05
SAP30BP	-0.0930773	0.0248786
DUSP11	-0.0937031	0.0371331
TDG	-0.0937232	0.0392441
INTS10	-0.0941452	0.0484084
CDC42SE2	-0.0944004	0.00673783
MED21	-0.094636	0.00436113
ZC3H13	-0.0951077	0.000725903
LMNA	-0.0951447	0.000238829
TFG	-0.0958965	0.000412523
SRSF11	-0.0961541	0.000133188
COPS3	-0.0964722	0.0288782
PARP14	-0.0966638	0.000485131
EIF1AX	-0.0968343	0.0113524
LGALS8	-0.0973229	4.17706e-07
USF2	-0.0980821	8.25547e-06
EEF1B2	-0.0983039	1.62175e-08
RHEB	-0.0984763	0.000736909
CCNH	-0.0986478	0.0274399
YBX1	-0.0988403	0.000197519
NDUFB9	-0.0992551	0.0138041
PSMA3-AS1	-0.0994931	7.09372e-05
SSBP1	-0.0996965	0.00510174
CCDC93	-0.0998681	0.000241207
BROX	-0.100412	0.0123115
SUZ12	-0.10077	0.0190985
S100A4	-0.101247	1.43597e-10
WDR43	-0.101314	0.00216157
RPA3	-0.101567	0.00172144
ARRDC3	-0.101873	0.00596617
CHSY1	-0.101908	8.8915e-07
C4orf48	-0.102081	0.000549184
ANKLE2	-0.102195	0.000602563
RPS13	-0.102564	3.5353e-09
ZNF394	-0.102885	0.00642417
RPS6	-0.102924	0.00209201
RBM25	-0.103122	0.000231525
SMAP1	-0.103438	0.000192584
ZNRF1	-0.103542	0.00299077
SGTB	-0.104075	0.00045159
YAF2	-0.104203	6.73432e-06
WAC	-0.10463	0.0318156
MT-ND4L	-0.104785	3.97999e-06
MAPKAPK5-AS1	-0.105045	0.0186437
TIMP1	-0.105795	4.45175e-08
ATG5	-0.105868	0.00740899
OCIAD1	-0.105962	0.0129352
MRPS15	-0.106178	1.58235e-07
TMX1	-0.106356	0.00959116
TUFM	-0.106562	0.00834751
TLK1	-0.106597	0.0131305
ILF3-DT	-0.106735	0.00592706
GABARAPL1	-0.106843	0.0244818
ADIPOR1	-0.106907	0.042246
RCAN3	-0.106929	0.0138288
MRPL52	-0.10696	0.0044011
COX7C	-0.107021	0.0474269
RPSA	-0.107047	9.15883e-05
GOLGA4	-0.107359	0.000178384
SGK1	-0.107591	0.00116577
SKI	-0.107716	1.47401e-05
RESF1	-0.107902	0.00216146
VBP1	-0.108131	0.00048936
PTK2B	-0.108152	8.57029e-18
RBM6	-0.108195	1.14103e-05
DDX27	-0.108511	0.0250446
RSBN1	-0.108739	0.0498457
SLA2	-0.10877	0.000328222
MRPL55	-0.108803	0.0244251
CHCHD7	-0.108998	5.21727e-05
COPS5	-0.109074	8.35007e-06
HNRNPA1	-0.109139	4.83178e-11
OSER1	-0.109209	0.000102657
TXNDC17	-0.109744	0.00913931
ATP5F1C	-0.109821	2.08768e-06
RPL35A	-0.109939	3.82697e-06
ERAP2	-0.11002	0.000621355
MIDN	-0.110126	0.0329958
PTPRC	-0.110193	0.00107563
MRPL21	-0.110329	0.0207739
NCBP2	-0.110665	0.000215428
SDHAF2	-0.110745	0.0233229
SLA	-0.11077	7.00593e-09
RPL30	-0.110905	1.1735e-15
THBS1	-0.111192	5.11027e-26
TRA2A	-0.111385	3.65704e-05
GOLGA8A	-0.111388	2.52494e-08
LACTB	-0.111741	0.0108868
TMEM50A	-0.111782	0.0330336
HNRNPA3	-0.111947	5.92591e-05
POLR1D	-0.111952	5.65188e-05
UBALD2	-0.112122	0.0235204
AP1G2	-0.11215	0.00785785
EXOSC6	-0.112262	0.00359208
BIN2	-0.112281	0.00112733
SCFD1	-0.112454	0.0412783
TMEM167A	-0.112702	0.000872592
EDEM1	-0.112731	0.0448174
ANP32E	-0.113649	0.000389792
PRPF38B	-0.113937	0.00940705
RPS16	-0.11394	1.90472e-06
NDUFS6	-0.114017	0.0219097
IFITM2	-0.114364	6.35746e-09
SEC11A	-0.114423	0.000338534
DNAJA2	-0.115075	0.0010594
PSMD7	-0.115201	0.000385027
ATP6V0C	-0.115261	0.000656546
HAGH	-0.115389	1.12856e-08
IL6ST	-0.115486	0.00762524
RHOH	-0.115658	4.40123e-05
IRF9	-0.116151	0.00726803
PSMB7	-0.116179	0.000103802
CTDSPL2	-0.116184	0.00249855
ZNHIT3	-0.116283	3.7822e-06
SHOC2	-0.116374	0.00639836
NDUFAB1	-0.116711	0.0072496
DTNBP1	-0.116755	0.00577547
PAK2	-0.116778	0.0120424
SNRNP70	-0.116945	0.00174417
ARPC3	-0.116966	0.00761118
BLOC1S2	-0.11722	3.25008e-05
POLE4	-0.117334	1.35123e-05
DPH3	-0.117369	0.030268
DYNC1LI2	-0.117722	0.0238271
FBXL3	-0.117823	0.0290246
DUSP16	-0.1179	2.12129e-07
EDF1	-0.11818	1.60851e-05
CD63	-0.118264	0.00362768
SLIRP	-0.118326	0.000169827
ARHGDIA	-0.118599	0.00511604
CYLD	-0.118886	0.000517964
DYNLT1	-0.119011	2.49939e-08
MAP1LC3A	-0.119054	0.000445442
USP16	-0.119205	0.000886956
OGT	-0.119618	0.000168926
DYNLRB1	-0.119929	0.000668101
TMEM170A	-0.119995	8.70634e-05
ZC3H15	-0.120017	1.21512e-06
EMC3	-0.120526	9.57048e-05
MRPL34	-0.120661	1.01724e-06
MGST3	-0.121153	0.000312499
CCDC186	-0.121154	4.91608e-05
MRPL32	-0.121298	0.000137384
PNPLA8	-0.121696	0.00776595
CRBN	-0.121781	0.01296
SDF4	-0.12191	0.0237759
SNX2	-0.122077	0.000182658
H2AFY	-0.122087	0.000621003
PRPS1	-0.122151	0.0224346
LYAR	-0.122488	0.00128297
CASP8	-0.122642	0.00374553
ISCA1	-0.122837	6.98807e-06
CHMP5	-0.123481	0.00083444
APOL6	-0.123569	0.000167211
MLEC	-0.123856	0.0147351
EIF4A3	-0.124041	0.0166786
NOP56	-0.124158	0.0285271
TRAC	-0.124195	0.000727086
LUC7L2	-0.124269	0.0278333
TRPM7	-0.124358	0.000119939
C21orf91	-0.124513	2.50794e-05
HMGN2	-0.12454	3.33803e-05
COX7A2L	-0.125221	6.0266e-05
ATP6AP2	-0.125429	0.000453459
SELENOM	-0.125451	0.0022762
ACADVL	-0.125493	0.000152632
SPAG1	-0.125512	0.00977969
N4BP2	-0.126115	3.09122e-11
TCEA1	-0.126656	0.00048744
PABPN1	-0.127376	0.0016766
GCLM	-0.127742	0.0237942
MYL12A	-0.127899	6.90888e-06
SRRM2	-0.127924	4.48588e-13
SLC25A4	-0.128071	0.000828507
KMT2E	-0.128354	5.97665e-11
RRP7A	-0.128911	0.00834663
NASP	-0.128957	0.00888393
MTHFD2	-0.129013	5.8885e-05
SRPRA	-0.129144	0.0170839
AURKAIP1	-0.129165	1.47448e-05
PHF1	-0.129681	0.0178993
TMED7	-0.12992	0.00468937
CTBP1	-0.130517	0.00224162
PRRC2C	-0.130554	1.15363e-08
HOPX	-0.130739	0.00178299
TMEM39A	-0.131	0.000221862
SUMO1	-0.13113	3.91567e-06
NTMT1	-0.131179	0.00701514
UQCR11	-0.131277	2.18591e-06
CIAO2B	-0.131493	9.13636e-08
RPL23	-0.132145	2.9448e-06
PNN	-0.132194	1.26567e-10
TMEM243	-0.132356	0.00062561
KMT2E-AS1	-0.132397	0.000390803
B4GALT5	-0.132612	0.000118705
FGFR1OP2	-0.132828	0.000126441
HAT1	-0.132923	0.00150687
RNASEH2C	-0.132941	3.41091e-09
SDHB	-0.133161	0.000227851
SAR1B	-0.133278	0.000751749
DPY30	-0.133731	0.00020407
CAMTA1	-0.133839	4.26815e-05
RPL15	-0.133976	5.52773e-15
POLR2F	-0.134184	0.000325981
COPE	-0.134252	2.64006e-05
H2AFV	-0.13444	9.34277e-07
SLC16A3	-0.134476	8.50763e-07
H3F3A	-0.134842	1.18793e-07
UNC119	-0.13491	4.40172e-06
LEPROTL1	-0.135043	0.000117639
AL118516.1	-0.135758	0.0257318
SUMO2	-0.135839	2.90718e-07
NDUFC2	-0.135912	1.44124e-12
SSB	-0.13601	2.31849e-07
CDK11A	-0.136286	1.53411e-06
DAZAP1	-0.136414	0.000320343
SDCBP	-0.13646	0.00017569
RPS28	-0.136764	1.43058e-13
NDUFB6	-0.136798	0.00101205
RBMS1	-0.13683	0.000268196
DDX3Y	-0.136984	4.52213e-06
RASGRP2	-0.137291	0.000305366
KAT2B	-0.137443	0.000108406
MIF	-0.137633	1.42475e-12
MRPL22	-0.137845	9.25068e-06
HMGB1	-0.137872	6.87114e-09
TUBA1B	-0.138777	2.50969e-09
EIF1AY	-0.138946	7.84972e-06
IFI16	-0.139331	1.30142e-05
ELF1	-0.139848	6.63566e-07
MRPL20	-0.139995	0.000323049
VMP1	-0.140081	0.00015239
NUCKS1	-0.14023	3.33984e-05
COA4	-0.140645	1.35742e-06
LUZP1	-0.140665	3.30551e-08
RPF1	-0.140723	8.29601e-08
EIF2AK2	-0.141344	4.36443e-06
TARSL2	-0.141472	0.00605821
SNRPE	-0.141499	0.000301299
NARS	-0.141643	6.71096e-06
KIF20B	-0.142075	3.25472e-06
SNHG3	-0.142277	1.46216e-05
SON	-0.143076	4.16801e-08
BTF3L4	-0.143078	2.97578e-05
TAF1D	-0.143703	1.21685e-08
CGGBP1	-0.144015	5.74779e-07
PARP8	-0.144102	2.88548e-06
XRN2	-0.14453	2.86001e-06
CEBPZ	-0.144573	2.95384e-07
RPL35	-0.144581	6.23636e-17
JUND	-0.144603	1.47039e-10
ABCF1	-0.145036	9.0423e-06
BAG1	-0.145209	4.84955e-05
ELK3	-0.145325	2.9323e-09
BMI1	-0.14554	0.00503683
MED4	-0.145721	2.39945e-07
CCNL1	-0.145839	4.95142e-08
RBM3	-0.146404	1.53749e-05
PHB	-0.146998	4.41588e-06
RAB5IF	-0.147096	0.000295525
ARGLU1	-0.14768	1.2706e-06
TMED10	-0.14791	5.25053e-05
TBCA	-0.148026	7.55299e-10
RBM8A	-0.148123	9.05329e-08
IK	-0.148366	3.99282e-07
SNF8	-0.14855	3.80536e-08
DNAJC19	-0.148593	9.85594e-06
RBM22	-0.14875	3.01758e-05
IRF7	-0.149839	0.000360227
SH2D1A	-0.150624	6.96915e-15
PEBP1	-0.150973	1.64168e-05
WDR6	-0.15116	2.15694e-06
PCMT1	-0.151379	2.00964e-07
CFLAR	-0.151439	2.24202e-05
POLR2J3	-0.151556	2.23034e-06
MRPL47	-0.151756	3.93759e-10
TRAPPC2B	-0.15199	5.72767e-06
CREBRF	-0.152637	6.87266e-07
EIF2A	-0.152738	1.44697e-05
RNF113A	-0.152812	6.98491e-05
PFKP	-0.152957	6.62616e-11
CNOT7	-0.153278	1.53544e-06
CDKN2AIP	-0.153302	0.000238759
TNIP2	-0.15332	0.000212094
PDCD10	-0.153455	2.99915e-06
GADD45GIP1	-0.153469	1.63478e-05
ZNF831	-0.153848	5.33216e-09
PSMB3	-0.153929	2.23438e-08
NXT1	-0.154669	3.4121e-05
TOMM20	-0.154791	4.14023e-08
ATP1B3	-0.154821	7.06107e-05
SNHG1	-0.15493	0.000616836
AMD1	-0.155158	4.28396e-06
CYP20A1	-0.155497	1.98553e-05
CTDP1	-0.155555	4.6168e-07
MX2	-0.155718	1.36531e-06
ABT1	-0.15675	1.62364e-08
RPL32	-0.156823	5.96529e-29
C12orf29	-0.156848	1.15822e-07
HK1	-0.156904	2.22487e-05
TAF9	-0.157114	2.319e-11
RAC1	-0.157116	1.23945e-07
SNRNP27	-0.157285	1.7072e-07
GSTP1	-0.157617	1.05014e-05
SELENOT	-0.157651	4.27105e-07
EIF2S2	-0.157941	2.40086e-08
MRPS30	-0.157954	1.80717e-07
POLR1E	-0.157991	6.90535e-05
RUNX3	-0.158151	8.45478e-11
LSM8	-0.158302	2.21343e-10
BTD	-0.158568	2.60369e-08
PPP2R3C	-0.15879	1.74523e-09
MALSU1	-0.158809	1.50857e-08
RPS19	-0.158854	8.66923e-25
CREBZF	-0.159052	5.32231e-08
ATP5PF	-0.159219	1.50145e-06
CAPZA1	-0.159488	2.14218e-10
NDFIP1	-0.159788	1.45321e-07
LRRC59	-0.159935	2.95848e-08
ARL5A	-0.160009	1.05238e-08
SMCHD1	-0.160434	1.21952e-08
TBCC	-0.160676	2.70157e-06
ATP5MD	-0.160767	1.31522e-09
RNF125	-0.160913	3.25639e-06
BCL2L11	-0.161372	9.16909e-05
UQCRQ	-0.161646	9.48214e-09
C1QBP	-0.161657	3.4657e-06
NOP10	-0.161832	9.16108e-07
DDX39A	-0.162213	1.94593e-05
SURF2	-0.162431	1.19987e-05
NDUFB4	-0.162436	8.95357e-10
CREBBP	-0.162624	4.76426e-06
GABPB1	-0.162792	3.07487e-08
LENG8	-0.162826	4.48478e-07
CISD2	-0.163255	3.01697e-07
DDX39B	-0.163287	4.73981e-12
CSNK1G2	-0.163383	1.0291e-08
SYF2	-0.163614	3.91053e-12
MXRA7	-0.163674	0.000186458
ETS2	-0.164156	6.085e-08
THUMPD1	-0.164167	3.24439e-07
KRTCAP2	-0.164206	6.88433e-09
SAMHD1	-0.16422	2.83484e-06
GHITM	-0.164276	2.97085e-07
DAD1	-0.164409	5.9554e-07
PDIA4	-0.164499	2.83731e-08
SNRPA1	-0.164765	2.89039e-08
UPP1	-0.165087	5.48594e-05
PSMA2	-0.166001	8.00918e-08
AC010883.3	-0.166454	1.86981e-05
CELF2	-0.166897	2.12364e-12
ZNF267	-0.167411	8.05084e-06
FUNDC2	-0.167551	1.21638e-06
RBM39	-0.167573	1.12424e-13
GTF2A2	-0.167635	2.01017e-07
EIF2S1	-0.167657	2.89446e-09
SPPL2A	-0.167765	2.99003e-06
LLPH	-0.167899	4.641e-11
HUWE1	-0.168222	1.77528e-05
IER3IP1	-0.168474	6.44076e-08
HIPK1	-0.168532	2.0457e-07
BCL7B	-0.168543	3.73896e-09
ERH	-0.16861	1.35849e-06
PA2G4	-0.16872	4.19235e-08
PIK3R1	-0.168916	3.64149e-15
AC136475.3	-0.169022	8.72513e-10
RNMT	-0.169063	6.66691e-08
ETS1	-0.169151	4.75468e-11
MT-CO3	-0.169269	5.78854e-74
WBP11	-0.169662	4.69334e-07
GRPEL1	-0.169767	9.67635e-09
LSM5	-0.169962	3.68229e-10
TM9SF3	-0.169999	2.91551e-07
NAP1L1	-0.170188	2.09581e-09
B4GALT4	-0.170276	5.78274e-10
PTMS	-0.170913	7.99618e-11
USP9Y	-0.171198	1.08616e-06
PABPC4	-0.171282	1.37099e-05
CFDP1	-0.171932	3.83467e-10
ZBTB16	-0.17218	4.84422e-08
LUC7L	-0.172251	1.39179e-08
AP002387.2	-0.172385	7.71366e-08
RSL1D1	-0.172845	2.49271e-07
HNRNPM	-0.173231	8.20079e-08
C7orf50	-0.173375	1.37823e-09
RPS19BP1	-0.174109	1.0263e-09
SELENOF	-0.17443	2.14259e-08
COPS2	-0.174972	8.58622e-10
AKAP17A	-0.17525	5.52833e-08
PSMD9	-0.175264	5.55226e-13
RYBP	-0.17528	1.07706e-10
DNAJC8	-0.175513	3.57199e-09
ATP6V1F	-0.176153	1.28008e-07
TBC1D15	-0.176468	2.42901e-11
CMTM6	-0.176522	9.10305e-08
DDT	-0.176657	3.94381e-07
A1BG	-0.176965	1.64643e-08
AC245297.3	-0.177069	4.4409e-09
RPL7	-0.177725	3.05748e-09
NECAP2	-0.178053	1.66198e-09
REXO2	-0.178206	7.67703e-11
YWHAE	-0.178262	1.12211e-11
EIF5B	-0.17864	4.20421e-09
IKZF1	-0.178924	2.45831e-11
TMCO1	-0.179038	5.73625e-10
PTP4A2	-0.179242	1.57915e-15
CD59	-0.179275	1.74313e-08
EMC4	-0.17952	8.34189e-09
SND1	-0.180057	7.59437e-07
PRORP	-0.180093	9.64258e-16
NDUFA4	-0.180196	1.65281e-10
PHF11	-0.180541	1.8669e-11
SRP9	-0.180873	2.22339e-08
SMNDC1	-0.180909	2.59353e-09
PRKAA1	-0.180961	4.96697e-08
SRRM1	-0.18128	1.87861e-11
NOL7	-0.181563	1.00321e-07
SRSF5	-0.18238	1.4376e-09
CWF19L2	-0.182454	9.49471e-09
RPLP2	-0.182456	2.43261e-21
NDUFA1	-0.182467	1.1935e-10
GPS2	-0.182833	6.72114e-10
PLIN2	-0.182957	3.89335e-09
CSNK1D	-0.183052	3.48183e-09
DYNLT3	-0.183183	4.30336e-09
ARL4A	-0.183199	4.69386e-08
MRPL57	-0.183348	7.80745e-08
DERL2	-0.183461	1.30372e-10
BUD31	-0.183762	2.47426e-12
IL32	-0.184163	1.21142e-18
TAX1BP1	-0.18418	3.32829e-12
SNU13	-0.184325	6.50538e-13
MAPRE1	-0.184606	1.76941e-09
COX5B	-0.18509	5.66184e-15
PSMD11	-0.185181	1.87603e-08
TMEM258	-0.185469	6.60285e-12
CIR1	-0.185864	6.24987e-08
CMC1	-0.186725	7.58633e-41
CAPZA2	-0.186965	1.59066e-11
DBI	-0.187084	1.63382e-09
RBM7	-0.187873	1.68683e-11
MDM4	-0.187893	4.01042e-10
TMEM70	-0.188426	3.82714e-10
SLC35B1	-0.188606	6.44873e-15
PRMT2	-0.188991	6.92674e-10
JTB	-0.189126	4.52934e-12
KDELR2	-0.189412	1.41233e-10
ISG20	-0.189923	3.84891e-17
RAPGEF6	-0.190309	7.23337e-14
SF3B5	-0.190371	4.08942e-11
C9orf78	-0.190828	8.23003e-11
ARCN1	-0.191202	4.85516e-09
TIAL1	-0.191859	6.43235e-12
SLAMF1	-0.191971	1.33372e-08
DCXR	-0.191985	3.98104e-12
BHLHE40	-0.192143	3.83914e-07
RPL36	-0.192703	5.37163e-31
ATP6V1G1	-0.193705	8.71657e-10
C1D	-0.194273	1.45232e-13
WAKMAR2	-0.195321	4.53101e-10
GPX4	-0.195511	8.1965e-13
ERVK3-1	-0.195883	5.1055e-12
PTPN1	-0.196496	6.12148e-13
CAST	-0.19661	1.28372e-10
MAPKAPK2	-0.196828	9.64633e-11
PAIP2	-0.196888	1.39979e-14
CHCHD2	-0.197053	2.37054e-19
NKAP	-0.197087	8.76963e-10
C19orf53	-0.197543	2.85987e-13
TMED9	-0.197566	3.03855e-10
SEC61A1	-0.198052	2.4715e-12
ARPP19	-0.198592	4.1105e-10
HMGN1	-0.198741	4.04287e-13
SPCS1	-0.199153	1.45191e-12
SAT2	-0.200155	1.47264e-14
UBE2I	-0.201256	1.34945e-12
TUBB4B	-0.201699	6.77776e-13
CHMP2B	-0.2022	3.58128e-11
SBNO2	-0.202268	1.97782e-09
PCNX1	-0.202314	1.80155e-21
C4orf3	-0.20296	3.92799e-14
ITM2B	-0.203322	1.78465e-17
RNF115	-0.203674	2.79157e-09
PSMA4	-0.204176	7.78711e-14
SUPT5H	-0.204456	2.49381e-10
ATP6V0E1	-0.204744	8.31444e-15
C18orf32	-0.204869	4.37688e-12
MRPL41	-0.205165	1.17724e-10
PTPN2	-0.205442	1.42759e-14
DOCK10	-0.205626	6.4278e-12
GYPC	-0.205676	4.15387e-14
HNRNPH3	-0.205949	1.39057e-15
ANKRD36B	-0.206422	7.68368e-13
WTAP	-0.206484	8.81435e-13
FRMD4B	-0.206525	1.24772e-08
HYOU1	-0.206649	7.46917e-13
RAB5A	-0.206854	5.45669e-12
SNRPB	-0.207248	7.29895e-15
BZW1	-0.207347	2.72053e-15
MED30	-0.207864	3.63709e-13
THAP5	-0.208048	7.66222e-20
PRKRA	-0.208733	1.5498e-12
AC016831.1	-0.20876	6.19736e-08
RPS24	-0.209601	1.17851e-52
SNHG7	-0.210012	1.66987e-12
EMC7	-0.210029	1.74304e-12
OSTF1	-0.210154	4.80253e-11
NDUFB1	-0.210212	2.32772e-16
MRFAP1	-0.210706	1.03224e-14
GABPB1-IT1	-0.210942	5.59561e-11
ELOB	-0.21095	5.98229e-15
SARS	-0.211383	1.43064e-12
PGK1	-0.211787	4.50019e-22
AIMP1	-0.21181	1.15618e-13
TYMP	-0.212345	8.4352e-12
ISCU	-0.213302	4.34024e-13
CMPK1	-0.213303	1.8445e-11
ARHGEF7	-0.214252	1.55696e-20
SNHG29	-0.214456	1.33772e-19
GLRX	-0.215614	9.92463e-11
NFKB2	-0.215749	5.98078e-14
ALG13	-0.215782	6.57493e-10
PRXL2C	-0.215866	4.00375e-12
RSRC2	-0.216234	6.57167e-16
NDUFA5	-0.2164	5.49697e-15
COPS9	-0.217419	2.33721e-15
ROMO1	-0.217447	6.21927e-12
RPS27A	-0.217786	1.87324e-64
VAV3	-0.217941	7.99626e-11
DNAJB11	-0.217992	2.66554e-14
RPL37A	-0.21845	1.98051e-19
NIBAN1	-0.218767	8.13892e-14
SET	-0.219314	1.01795e-20
PSMD12	-0.21967	1.2628e-13
BUD23	-0.219919	2.13132e-14
PPP2R5C	-0.220113	4.4116e-23
RPL37	-0.220429	4.68085e-38
PPIG	-0.220449	2.48138e-16
WDR33	-0.221416	3.20915e-16
SATB1	-0.221611	2.06013e-12
ERN1	-0.22197	6.26616e-09
PLSCR1	-0.222081	1.95096e-13
RORA	-0.222314	1.56892e-12
PAPOLA	-0.222537	2.00969e-16
RPL27	-0.222862	1.96359e-43
ORMDL1	-0.223493	4.64175e-12
LSM12	-0.223527	2.75539e-18
PITHD1	-0.22398	1.31507e-13
HLA-F	-0.224243	5.18284e-18
KLF9	-0.224342	1.35048e-13
BAX	-0.224533	1.98434e-12
SNRPN	-0.224724	2.4878e-14
NDUFB8	-0.225888	2.23664e-19
PHF20	-0.22646	6.02677e-17
CCDC107	-0.226919	1.96956e-13
JUNB	-0.227243	2.89389e-35
HSPA13	-0.227413	1.4276e-15
LMO4	-0.228028	1.25299e-13
CREM	-0.228139	1.87779e-13
CYB5A	-0.228363	1.56007e-19
NFKBIA	-0.22842	2.4219e-23
SRSF6	-0.22869	4.58632e-16
DANCR	-0.229344	1.51725e-15
PDIA3	-0.230621	1.13457e-20
CALM2	-0.230729	4.94221e-24
YBX3	-0.231296	2.31853e-13
DUSP6	-0.231984	3.0383e-15
AC007384.1	-0.232835	2.74551e-12
AL627171.2	-0.234319	1.5062e-16
RANBP1	-0.23442	9.47856e-16
ITGA1	-0.235005	1.70621e-16
WDR74	-0.235136	5.50726e-17
MOB2	-0.235165	2.05933e-19
POLE3	-0.235772	1.40195e-14
SPON2	-0.236122	9.19969e-13
N4BP2L2	-0.237934	3.86088e-18
LAG3	-0.238513	2.92169e-22
STOM	-0.239563	3.30877e-17
GTF2B	-0.239632	5.36687e-15
RBM17	-0.239805	1.29118e-16
C11orf58	-0.239832	1.23834e-19
UFM1	-0.240354	5.62024e-17
CHPT1	-0.240976	7.78096e-14
S100A6	-0.241213	8.7493e-28
PET100	-0.243621	1.96561e-19
IQGAP2	-0.243689	3.00351e-17
CD53	-0.244724	2.84831e-25
PTMA	-0.245493	5.15073e-58
RPL22L1	-0.245824	1.55843e-21
TMBIM6	-0.246224	2.00083e-26
PCNP	-0.246409	3.05476e-18
RPL22	-0.246704	5.18789e-35
SRP19	-0.246962	1.67453e-15
ARF4	-0.247134	1.42526e-17
SLC38A2	-0.24732	2.97851e-20
RPL34	-0.247697	4.03153e-79
RILPL2	-0.247799	1.13509e-17
VPS26A	-0.248276	1.29533e-16
RGS9	-0.248324	9.10521e-24
RBMX	-0.249236	1.68925e-20
SNHG17	-0.249384	3.56737e-22
PIK3IP1	-0.251698	9.37763e-19
RWDD1	-0.252069	4.44459e-18
JAML	-0.252177	2.59359e-24
DUSP5	-0.252197	2.24168e-17
PSMB1	-0.253371	1.49036e-19
PHTF1	-0.25343	2.46045e-18
MTFP1	-0.253585	6.69115e-16
PDIA6	-0.253602	4.95838e-19
PLEKHG2	-0.254035	1.07025e-21
IKZF3	-0.254431	1.20974e-21
CRELD2	-0.254587	1.09314e-18
PPP1R10	-0.255219	1.28585e-19
SUB1	-0.255335	1.28981e-25
SF3B6	-0.257585	2.89029e-21
STK17B	-0.257607	2.648e-29
CEBPG	-0.258707	7.23747e-20
PCBP2	-0.259049	6.38187e-23
SVIP	-0.259584	8.54511e-19
SNRPB2	-0.260585	5.41622e-20
PELO	-0.260689	5.48169e-19
NAP1L4	-0.260832	7.20313e-25
DSTN	-0.262406	1.17195e-20
PRDX2	-0.262735	2.40515e-20
IER3	-0.262881	1.61899e-10
UBL5	-0.263417	1.34626e-27
SYTL3	-0.264009	1.22306e-25
LDHA	-0.264073	4.56103e-30
RPL23A	-0.265771	6.11144e-46
GTF3C1	-0.266521	7.34536e-18
PSMA3	-0.266575	5.09414e-23
MAFF	-0.266631	5.82633e-18
CYTIP	-0.267034	1.37188e-42
KRT10	-0.268035	1.62777e-21
DCTN6	-0.268191	5.53255e-26
ATP5ME	-0.26868	1.96454e-21
LPAR6	-0.268844	4.6672e-18
HLA-A	-0.269512	9.8611e-49
CALR	-0.270209	1.72096e-37
SEC14L1	-0.270941	2.48203e-18
NDUFA12	-0.2721	4.85161e-22
ZFP36L2	-0.272428	4.5659e-105
RAB21	-0.273232	9.25029e-25
DIP2A	-0.27376	2.57764e-19
MOB1A	-0.277966	5.25589e-26
SNHG8	-0.278186	1.59055e-27
HM13	-0.278508	4.53437e-23
AC044849.1	-0.279534	5.00719e-23
RPS27L	-0.280498	1.08463e-25
RPL36A	-0.281293	2.15449e-60
OST4	-0.281505	1.29825e-36
HEXIM1	-0.281566	8.93918e-24
SLC3A2	-0.282055	7.15414e-36
TMEM107	-0.282471	5.85903e-19
COX6C	-0.282975	3.79328e-27
CXCR6	-0.283679	2.6077e-12
TARS	-0.28385	6.55327e-25
ERP44	-0.284211	8.55401e-25
CANX	-0.284497	1.97808e-22
SLC1A5	-0.284574	4.64401e-22
DDX21	-0.28491	5.98342e-27
KLF6	-0.285292	2.83106e-36
STMN1	-0.286664	5.27745e-20
ITGAE	-0.287522	5.65166e-23
ATP5F1E	-0.288785	4.27457e-51
ANAPC16	-0.289276	1.03358e-27
HNRNPDL	-0.29007	7.86129e-55
CEBPD	-0.290295	1.90157e-11
CDC42	-0.290398	6.92649e-33
TMA7	-0.290972	7.12839e-40
GABARAPL2	-0.292539	3.00037e-26
AL021155.5	-0.293271	1.08963e-26
PFKFB3	-0.29394	1.91814e-21
SBDS	-0.293988	4.61214e-26
KDSR	-0.294799	3.57239e-27
NDUFB2	-0.295283	1.42635e-29
PBX4	-0.295903	6.15393e-30
SNHG9	-0.29604	9.53844e-23
PIM2	-0.297029	2.28894e-20
DNAJC3	-0.297041	2.17967e-24
OSTC	-0.297853	5.71127e-28
SERP1	-0.297873	6.75622e-39
ATF4	-0.29884	1.49471e-31
ENY2	-0.299169	5.65727e-28
GPR183	-0.30198	1.24765e-21
TMEM123	-0.302391	3.10076e-26
ALOX5AP	-0.303832	5.54486e-44
ST3GAL1	-0.305146	1.84393e-27
SPCS3	-0.306502	3.19734e-29
SNX9	-0.306895	1.30209e-22
AC007952.4	-0.310962	3.77537e-38
DDX18	-0.311049	3.52375e-25
LAPTM4A	-0.311099	1.03819e-28
ATP1B1	-0.311239	1.96048e-35
SAR1A	-0.311587	9.71668e-29
BCL6	-0.312223	2.09667e-26
SSU72	-0.312396	6.9053e-30
ZFP36	-0.313029	2.62196e-104
SNHG15	-0.313642	1.5546e-30
LRPAP1	-0.313669	5.72793e-30
H2AFZ	-0.31477	4.4714e-39
CCDC59	-0.314922	1.20209e-26
GLUL	-0.315276	3.37217e-23
SAP18	-0.316168	1.10948e-38
P4HB	-0.31884	7.1806e-29
METRNL	-0.320432	1.64452e-39
CDC26	-0.320563	1.10456e-34
C6orf62	-0.323874	1.42597e-36
MORF4L1	-0.324874	7.23018e-41
PFDN2	-0.324997	1.90251e-34
CD2	-0.327591	5.26261e-33
ARF6	-0.327658	6.28141e-44
SIVA1	-0.327724	6.71225e-32
CYCS	-0.329281	2.61582e-33
RPL21	-0.330364	1.99204e-55
GLO1	-0.333762	2.33511e-38
BOLA2	-0.333798	8.45901e-38
CSKMT	-0.333925	8.75615e-28
MAGOH	-0.336166	4.21771e-36
RPS21	-0.337983	3.11645e-129
LINC-PINT	-0.338886	1.37429e-50
MRPL33	-0.339137	1.5395e-35
PTGER4	-0.340736	3.59261e-30
SLC30A1	-0.340946	8.79958e-36
SNHG12	-0.341523	1.91808e-33
RPS20	-0.342568	3.18809e-27
HPGD	-0.342579	2.65795e-26
RELB	-0.343067	2.18296e-29
RPL9	-0.344866	3.07234e-85
KTN1	-0.345508	6.8451e-38
AC020916.1	-0.345549	3.09435e-30
BRD7	-0.345655	1.99868e-34
CXCR4	-0.345671	6.25364e-85
LINC00623	-0.348352	1.22132e-39
IL18R1	-0.349825	1.6229e-42
AKAP13	-0.350544	7.34437e-54
BRD9	-0.351031	2.51879e-35
TMSB10	-0.353616	5.56194e-69
TMEM59	-0.353774	1.19546e-45
CCL20	-0.354084	2.42685e-40
SKP1	-0.355474	1.87832e-54
AC253572.2	-0.356474	9.59583e-24
SRP14	-0.357157	6.39675e-51
COX14	-0.360894	6.63731e-39
POLR2K	-0.361419	1.52127e-30
FOSL2	-0.362264	3.1031e-40
RPL36AL	-0.363286	4.05251e-79
SOD2	-0.364219	1.16414e-36
SSR3	-0.365122	5.07036e-43
RPS27	-0.365849	6.52905e-146
AC026979.2	-0.366617	3.06536e-32
NFIL3	-0.366856	4.97929e-35
POMP	-0.36757	5.14153e-42
EPB41L4A-AS1	-0.369822	6.39403e-42
MYDGF	-0.371254	7.09372e-44
PIM1	-0.373663	5.84221e-41
CNOT6L	-0.376571	1.21184e-51
SEC11C	-0.378128	3.22371e-46
RABGGTB	-0.383048	2.01502e-45
GPR65	-0.384312	6.1571e-41
RGS1	-0.384939	2.06073e-30
C1orf56	-0.387159	9.59386e-43
PDCL3	-0.387162	5.95125e-39
GADD45A	-0.388884	1.64734e-31
CD55	-0.389558	1.18928e-37
POLR2L	-0.389839	1.29711e-46
FTL	-0.39051	7.89378e-107
PHLDA1	-0.390913	1.74206e-27
UBE2B	-0.391247	1.08671e-54
RPL39	-0.393998	4.11149e-182
TSC22D3	-0.394137	1.48765e-123
TNFAIP3	-0.394603	9.61753e-53
MGAT4A	-0.395271	4.24542e-43
COX17	-0.395407	2.92259e-42
PRF1	-0.40165	1.87809e-38
TPT1	-0.40399	8.07328e-193
TMED2	-0.404249	2.6029e-50
COX7B	-0.404504	1.5551e-58
TMEM173	-0.404779	1.20126e-46
BATF	-0.410928	1.96229e-36
VAPA	-0.411307	1.0992e-58
FOSB	-0.412418	8.2655e-39
[truncated: 112 more rows]

## Sheet: table S4 CD4 T subset markers 
table S4. CD4 T subset markers
Gene	p_val	avg_log2FC	pct.1	pct.2	p_val_adj
Cluster 1 (Th1) top200 markers
HLA-DRB1	0	1.77841	0.766	0.268	0
GZMB	2.29e-226	1.58454	0.366	0.128	6.57e-222
HLA-DRA	0	1.39704	0.535	0.159	0
CD74	0	1.36179	0.861	0.641	0
DUSP4	0	1.35813	0.672	0.252	0
GZMA	0	1.32618	0.369	0.096	0
HLA-DQA1	0	1.19828	0.39	0.087	0
CCL5	3.07e-297	1.19252	0.722	0.42	8.81e-293
HLA-DPA1	0	1.18135	0.569	0.185	0
HLA-DPB1	0	1.13081	0.544	0.174	0
CCL4	2.05e-141	1.09491	0.534	0.314	5.89e-137
CD4	1.1e-299	1.00463	0.679	0.342	3.15e-295
ACTB	1.43e-154	0.96891	0.982	0.932	4.09e-150
CD52	1.78e-240	0.962969	0.697	0.432	5.1e-236
CTLA4	5.58294179800609e-322	0.950996	0.539	0.2	1.60E-317
HLA-DRB5	0	0.927399	0.319	0.056	0
GAPDH	0	0.917438	0.98	0.886	0
CXCR6	2.57e-277	0.911764	0.419	0.133	7.38e-273
S100A4	6.41e-215	0.900913	0.837	0.606	1.84e-210
PFN1	1.93e-255	0.894664	0.913	0.784	5.54e-251
SH3BGRL3	2.5e-250	0.88685	0.898	0.74	7.16e-246
MIR4435-2HG	1.11e-305	0.883581	0.33	0.072	3.2e-301
COTL1	1.95e-289	0.883543	0.807	0.54	5.6e-285
HLA-DQB1	2.43e-283	0.877243	0.494	0.183	6.98e-279
ALOX5AP	2.12e-286	0.861338	0.792	0.487	6.1e-282
TXN	3.07e-208	0.798035	0.74	0.468	8.82e-204
RBPJ	3.89e-225	0.795548	0.662	0.363	1.12e-220
LSP1	4.17e-160	0.782763	0.5	0.262	1.2e-155
IFNG	6.4e-188	0.770376	0.467	0.213	1.84e-183
GZMH	5.48e-218	0.767043	0.214	0.039	1.57e-213
CTSC	7.07e-217	0.764063	0.454	0.184	2.03e-212
NKG7	7.91e-70	0.74616	0.246	0.124	2.27e-65
LINC01943	3.39e-193	0.737725	0.245	0.061	9.72e-189
ZEB2	1.03e-199	0.732897	0.451	0.191	2.97e-195
ITGB2	1.92e-180	0.725426	0.463	0.212	5.53e-176
CORO1A	6.47e-120	0.715885	0.654	0.467	1.86e-115
GZMK	2.15e-62	0.712626	0.182	0.088	6.18e-58
GBP5	2.78e-171	0.683318	0.456	0.212	7.98e-167
CRIP1	1.12e-153	0.680178	0.819	0.609	3.22e-149
PLIN2	2.37e-95	0.669299	0.664	0.476	6.81e-91
HLA-DQA2	1.05e-166	0.664514	0.205	0.048	3.03e-162
CFL1	6.56e-189	0.647054	0.913	0.767	1.88e-184
GK	1.02e-115	0.631998	0.257	0.099	2.92e-111
IL32	7.16e-185	0.630889	0.937	0.794	2.05e-180
CYTOR	7.81e-236	0.628342	0.671	0.36	2.24e-231
TMEM173	2.45e-126	0.62243	0.497	0.278	7.03e-122
ARPC1B	3.43e-121	0.610751	0.545	0.332	9.85e-117
CDK6	6.9e-148	0.610323	0.246	0.077	1.98e-143
LGALS1	4.99e-97	0.608592	0.648	0.457	1.43e-92
ACTN4	1.03e-177	0.604937	0.563	0.298	2.96e-173
ACTG1	4.29e-114	0.599186	0.931	0.845	1.23e-109
CAPZB	3.17e-139	0.596955	0.617	0.387	9.1e-135
C12orf75	8.94e-167	0.594504	0.299	0.102	2.57e-162
CD2	1.52e-139	0.589055	0.798	0.594	4.37e-135
HLA-A	4.65e-301	0.587956	0.994	0.964	1.34e-296
PTPRJ	3.38e-127	0.585709	0.32	0.136	9.7e-123
ARPC3	2.87e-141	0.578996	0.698	0.479	8.25e-137
LGALS3	5.94e-152	0.576338	0.539	0.295	1.71e-147
JPT1	8.06e-161	0.574971	0.553	0.301	2.31e-156
CTSD	1.6e-153	0.570172	0.367	0.156	4.58e-149
YWHAB	2.92e-158	0.568097	0.763	0.529	8.38e-154
PGAM1	5.7e-128	0.567842	0.489	0.27	1.64e-123
ARHGDIB	3.5e-167	0.565521	0.897	0.745	1e-162
S100A6	1.47e-146	0.561332	0.879	0.705	4.23e-142
PSME2	3.28e-127	0.560996	0.507	0.286	9.41e-123
NAMPT	3.2e-124	0.556827	0.665	0.443	9.18e-120
PPP1CA	4.11e-134	0.555555	0.332	0.141	1.18e-129
APOBEC3G	6.04e-170	0.555361	0.308	0.108	1.73e-165
OASL	2.61e-107	0.553751	0.285	0.124	7.5e-103
CAP1	5.28e-140	0.551355	0.479	0.251	1.52e-135
GNG2	6.7e-126	0.550422	0.726	0.51	1.92e-121
METRNL	6.27e-103	0.548186	0.523	0.321	1.8e-98
PRF1	2.23e-69	0.545557	0.268	0.137	6.39e-65
ANXA5	3.11e-157	0.540032	0.568	0.317	8.92e-153
CYBA	2.22e-158	0.537824	0.871	0.69	6.39e-154
HNRNPLL	2.11e-115	0.534127	0.464	0.258	6.05e-111
CCL4L2	2.9e-30	0.530844	0.174	0.1	8.32e-26
TRPS1	3.36e-136	0.530629	0.389	0.184	9.65e-132
LY6E	9.56e-126	0.525003	0.502	0.282	2.74e-121
FABP5	1.79e-114	0.523924	0.348	0.166	5.14e-110
COX8A	8.64e-116	0.521692	0.526	0.312	2.48e-111
PSMB9	2.94e-111	0.521597	0.435	0.237	8.43e-107
EVL	5.01e-136	0.520749	0.635	0.398	1.44e-131
PDIA6	9.97e-126	0.517197	0.447	0.236	2.86e-121
RAC2	1.13e-101	0.516003	0.712	0.528	3.25e-97
LCP1	3.57e-136	0.515933	0.847	0.668	1.02e-131
IL2RG	1.05e-115	0.511	0.741	0.545	3.03e-111
CRADD	1.01e-84	0.510489	0.166	0.056	2.91e-80
HLA-C	3.07e-205	0.509426	0.986	0.934	8.82e-201
NUSAP1	1.55e-138	0.508456	0.214	0.063	4.44e-134
ATP5MC3	2.75e-120	0.508123	0.523	0.305	7.9e-116
FRMD4B	6.43e-120	0.507278	0.473	0.263	1.85e-115
PTTG1	7.4e-137	0.50639	0.402	0.194	2.12e-132
RNF213	8.32e-122	0.504758	0.621	0.396	2.39e-117
C9orf16	7.66e-111	0.504372	0.481	0.276	2.2e-106
CD99	1.96e-142	0.503107	0.834	0.63	5.63e-138
LCK	5.02e-112	0.50166	0.507	0.298	1.44e-107
CCL3	5.86e-48	0.499208	0.169	0.08	1.68e-43
ATP5F1E	3.46e-169	0.497578	0.937	0.802	9.94e-165
MYL12B	4.92e-143	0.494299	0.837	0.635	1.41e-138
LAG3	3.56e-53	0.488299	0.255	0.141	1.02e-48
COX5A	7.01e-122	0.48821	0.44	0.232	2.01e-117
ENO1	4.61e-106	0.487981	0.624	0.416	1.32e-101
ISG15	8.39e-90	0.48706	0.486	0.3	2.41e-85
IL12RB2	4.84e-123	0.486399	0.181	0.05	1.39e-118
CD3D	3.47e-115	0.484637	0.74	0.537	9.95e-111
ANXA2	3.67e-120	0.484329	0.576	0.355	1.05e-115
ARPC2	3.32e-118	0.484118	0.771	0.577	9.53e-114
BCL2L11	1.3e-92	0.481404	0.293	0.138	3.73e-88
TNFRSF1B	3.12e-123	0.481292	0.61	0.384	8.96e-119
CLIC1	1.27e-128	0.479994	0.831	0.643	3.65e-124
MYL6	5.52e-166	0.479979	0.957	0.857	1.59e-161
HCST	1.48e-98	0.476816	0.589	0.387	4.26e-94
DBI	5.07e-119	0.473641	0.413	0.214	1.46e-114
HMGB2	1.04e-133	0.47356	0.807	0.59	2.99e-129
OAZ1	1.13e-142	0.468503	0.939	0.827	3.25e-138
PSMB3	9.99e-124	0.465806	0.444	0.236	2.87e-119
HLA-DMA	4.01e-174	0.465757	0.197	0.044	1.15e-169
ATXN1	1.75e-86	0.464863	0.511	0.325	5.01e-82
NDUFA13	1.13e-123	0.464136	0.592	0.366	3.26e-119
PTPN22	1.7e-115	0.459425	0.462	0.259	4.89e-111
SELPLG	2.06e-96	0.458984	0.385	0.208	5.92e-92
SUB1	4.04e-129	0.458868	0.836	0.647	1.16e-124
IDH2	1.35e-114	0.457835	0.319	0.145	3.88e-110
STARD7	1.68e-89	0.45544	0.432	0.253	4.82e-85
CD3E	3.17e-103	0.455078	0.814	0.644	9.11e-99
IQGAP2	2.48e-86	0.451976	0.588	0.4	7.13e-82
ITGA4	9.58e-118	0.449271	0.459	0.256	2.75e-113
TSPO	1.42e-104	0.447669	0.394	0.209	4.06e-100
ITGB1	9.43e-111	0.447233	0.57	0.358	2.71e-106
DR1	3.45e-132	0.446782	0.321	0.139	9.91e-128
NAA50	1.16e-118	0.444823	0.414	0.217	3.32e-114
GMFG	2.93e-100	0.443498	0.61	0.407	8.42e-96
GNA15	5.49e-84	0.441494	0.356	0.195	1.58e-79
RAB5IF	2.83e-96	0.440756	0.449	0.261	8.11e-92
ICOS	1.48e-95	0.439377	0.505	0.314	4.24e-91
TMEM50A	7.37e-116	0.434937	0.564	0.348	2.12e-111
TMSB4X	4.08e-85	0.433966	0.997	0.982	1.17e-80
TANK	1.01e-95	0.433804	0.595	0.396	2.91e-91
PARK7	1.97e-102	0.4323	0.497	0.299	5.65e-98
FKBP1A	2.79e-103	0.431363	0.272	0.118	8.02e-99
PKM	3.3e-73	0.430563	0.495	0.325	9.47e-69
PSME1	1.7e-84	0.429576	0.662	0.48	4.89e-80
ARL6IP5	4.88e-108	0.429177	0.62	0.408	1.4e-103
ARPC4	6.32e-86	0.427579	0.332	0.174	1.81e-81
IRF4	2.49e-85	0.427149	0.256	0.12	7.13e-81
BATF	2.19e-100	0.426075	0.705	0.503	6.28e-96
B2M	7.81e-235	0.425342	1	0.997	2.24e-230
TENT5C	1.95e-96	0.421956	0.673	0.474	5.58e-92
MT1E	7.99e-44	0.421636	0.176	0.095	2.29e-39
ELOB	3.57e-107	0.420096	0.617	0.406	1.03e-102
THEMIS	1.27e-70	0.416454	0.379	0.226	3.66e-66
ISG20	1.5e-75	0.415616	0.767	0.608	4.3e-71
SEM1	1.71e-122	0.412819	0.369	0.182	4.9e-118
IQGAP1	3.59e-110	0.411574	0.662	0.449	1.03e-105
CNN2	2.31e-60	0.409983	0.495	0.34	6.64e-56
TRBC2	2.6e-64	0.409663	0.613	0.451	7.46e-60
PDCD1	2.09e-73	0.408415	0.357	0.208	6.01e-69
GNAI2	2.85e-93	0.407354	0.632	0.435	8.17e-89
CALM3	3.1e-87	0.40359	0.371	0.206	8.9e-83
CKS2	1.28e-84	0.398389	0.404	0.236	3.67e-80
WDR1	5.47e-85	0.398277	0.351	0.191	1.57e-80
PSMD8	3.33e-104	0.397758	0.441	0.25	9.57e-100
LYST	2.65e-62	0.397606	0.329	0.192	7.62e-58
GLRX	5.46e-74	0.396047	0.334	0.187	1.57e-69
LIME1	7.32e-69	0.395364	0.436	0.277	2.1e-64
ATP5MF	1.15e-94	0.395263	0.337	0.174	3.29e-90
LMNB1	1.2e-105	0.395075	0.333	0.164	3.45e-101
PSMB6	1.87e-111	0.392488	0.385	0.202	5.36e-107
PSMB10	1.67e-97	0.391878	0.264	0.119	4.79e-93
COPE	4.11e-97	0.389721	0.396	0.22	1.18e-92
COX6A1	1.42e-96	0.389319	0.695	0.498	4.08e-92
SERF2	5.31e-104	0.388779	0.913	0.797	1.52e-99
IGFLR1	2.2e-92	0.38845	0.223	0.091	6.3e-88
ATP1B3	6.47e-81	0.388383	0.526	0.348	1.86e-76
ATP6V0B	1.15e-110	0.387159	0.423	0.233	3.31e-106
BSG	1.07e-94	0.386769	0.395	0.221	3.07e-90
BRK1	1.73e-94	0.386697	0.387	0.214	4.97e-90
RCAN2	8.93e-67	0.385095	0.122	0.039	2.56e-62
GYPC	5.77e-70	0.38495	0.629	0.459	1.66e-65
MDH2	1.1e-108	0.384223	0.351	0.178	3.15e-104
AKIRIN2	4.88e-113	0.38419	0.448	0.253	1.4e-108
S100A11	1.68e-86	0.383708	0.633	0.444	4.83e-82
LINC02694	6.15e-94	0.383002	0.117	0.027	1.77e-89
HLA-B	3.66e-153	0.381404	0.996	0.981	1.05e-148
HMGB1	1.93e-92	0.380909	0.868	0.72	5.55e-88
CORO1B	4.94e-68	0.379699	0.253	0.128	1.42e-63
CD81	2.24e-102	0.379137	0.592	0.389	6.44e-98
ATP5MG	2.56e-90	0.378773	0.834	0.683	7.36e-86
TALDO1	1.73e-111	0.378699	0.269	0.115	4.96e-107
TOX2	5.97e-145	0.378515	0.137	0.023	1.71e-140
LINC02195	6.97e-59	0.377837	0.104	0.032	2e-54
SMC4	8.91e-121	0.374891	0.303	0.134	2.56e-116
MYL12A	1.49e-81	0.374506	0.832	0.679	4.27e-77
CTSB	2e-97	0.373561	0.351	0.185	5.74e-93
ARF5	3.75e-93	0.372198	0.359	0.194	1.08e-88
CD8A	1.23e-19	0.371708	0.143	0.089	3.54e-15
ITGAE	1.58e-88	0.370805	0.276	0.133	4.53e-84
SEC61B	3.22e-89	0.370204	0.591	0.4	9.25e-85
SH3KBP1	4.6e-78	0.369479	0.437	0.271	1.32e-73
Cluster 2 (SELLhi) top200 markers
SELL	0	1.42464	0.442	0.106	0
TSHZ2	0	1.35091	0.355	0.06	0
SESN3	2.6531e-267	1.2015	0.417	0.145	7.61624e-263
LEF1	1.79159e-251	1.08317	0.384	0.123	5.14312e-247
CCR7	1.43991e-173	0.92615	0.512	0.24	4.13354e-169
KLF2	4.44218e-135	0.875245	0.665	0.468	1.27522e-130
FAAH2	1.13728e-119	0.846656	0.304	0.124	3.2648e-115
MAL	7.13482e-135	0.713043	0.268	0.09	2.04819e-130
ABLIM1	2.44923e-81	0.671499	0.264	0.142	7.03099e-77
PABPC1	8.88657e-191	0.620626	0.943	0.895	2.55107e-186
CMSS1	4.76109e-45	0.597278	0.227	0.139	1.36677e-40
NDFIP1	1.39081e-94	0.582751	0.569	0.457	3.99259e-90
CD55	4.01332e-97	0.582663	0.679	0.566	1.1521e-92
FOXP1	5.41768e-101	0.57568	0.666	0.564	1.55525e-96
APOO	1.53308e-51	0.574731	0.377	0.271	4.40101e-47
PELI1	3.01752e-62	0.574665	0.46	0.342	8.6624e-58
BACH2	1.1265e-46	0.55925	0.388	0.284	3.23385e-42
TCF7	8.35495e-66	0.544637	0.375	0.242	2.39846e-61
PLAC8	5.99271e-61	0.535558	0.293	0.166	1.72033e-56
TIAM1	2.78151e-72	0.519238	0.168	0.066	7.98489e-68
PASK	1.00751e-60	0.515779	0.176	0.076	2.89226e-56
ZEB1	1.22668e-53	0.515516	0.407	0.316	3.52143e-49
LTB	9.00955e-63	0.51084	0.57	0.416	2.58637e-58
SCML1	2.25397e-59	0.500661	0.171	0.075	6.47046e-55
RPL32	3.86656e-244	0.499443	0.977	0.987	1.10997e-239
RPS8	1.55572e-217	0.499056	0.976	0.985	4.466e-213
SARAF	1.6233e-146	0.49699	0.953	0.927	4.66001e-142
EEF2	9.11733e-109	0.495049	0.854	0.83	2.61731e-104
AP3M2	1.75227e-58	0.494902	0.241	0.137	5.03023e-54
RPS13	6.19639e-222	0.494895	0.96	0.976	1.7788e-217
RPS5	4.82544e-186	0.493025	0.938	0.951	1.38524e-181
IGLC2	1.28508e-07	0.487344	0.092	0.101	0.00368907
TRABD2A	1.42317e-49	0.486008	0.242	0.144	4.08549e-45
LYPD3	1.40274e-69	0.481971	0.156	0.054	4.02684e-65
TIGIT	1.6623e-50	0.479647	0.146	0.067	4.77198e-46
SC5D	5.39826e-48	0.477176	0.373	0.286	1.54968e-43
SAMHD1	2.12759e-47	0.473071	0.329	0.239	6.10768e-43
LDHB	1.29076e-72	0.472183	0.64	0.53	3.70538e-68
FCMR	6.77264e-51	0.470133	0.273	0.159	1.94422e-46
RPL29	1.27191e-197	0.470078	0.963	0.975	3.65126e-193
TBC1D4	6.7097e-64	0.469588	0.168	0.066	1.92615e-59
PLCL1	3.27747e-60	0.467346	0.14	0.051	9.40862e-56
RPL11	5.20363e-216	0.460106	0.976	0.987	1.49381e-211
DCXR	2.93692e-54	0.456937	0.462	0.375	8.43102e-50
TMEM131L	4.59414e-44	0.455395	0.296	0.202	1.31884e-39
IL6ST	1.22386e-46	0.453904	0.495	0.395	3.51334e-42
CRTC3	6.83268e-51	0.450381	0.269	0.162	1.96146e-46
NR4A2	6.23463e-45	0.449412	0.646	0.548	1.78977e-40
RPS3A	1.32219e-172	0.449296	0.977	0.983	3.7956e-168
RPL12	5.84776e-181	0.445721	0.961	0.977	1.67872e-176
RPL18A	7.79599e-168	0.442568	0.968	0.981	2.23799e-163
NDUFV2	6.19408e-57	0.43918	0.533	0.452	1.77813e-52
SNN	4.39362e-54	0.435345	0.169	0.077	1.26128e-49
CD28	3.09706e-44	0.42962	0.457	0.358	8.89073e-40
ZNF331	6.49416e-42	0.422533	0.614	0.528	1.86428e-37
EEF1B2	3.47702e-112	0.421913	0.912	0.902	9.98148e-108
SMCHD1	6.95222e-45	0.421849	0.788	0.741	1.99577e-40
USP3	8.31573e-44	0.419906	0.433	0.36	2.3872e-39
YPEL5	5.97045e-59	0.41985	0.596	0.531	1.71394e-54
MARH3	9.24561e-45	0.418893	0.179	0.089	2.65414e-40
CCR4	1.57338e-32	0.418362	0.253	0.179	4.51672e-28
CD247	3.49842e-44	0.417798	0.458	0.371	1.00429e-39
RNASET2	2.56496e-45	0.417088	0.415	0.339	7.36323e-41
ARID5A	2.24984e-48	0.415591	0.549	0.46	6.45861e-44
RPL13	2.06098e-165	0.415518	0.987	0.992	5.91647e-161
NFATC1	3.49923e-34	0.412058	0.306	0.211	1.00452e-29
RPL19	9.58808e-167	0.409628	0.971	0.984	2.75245e-162
GK	8.12957e-25	0.40745	0.177	0.116	2.33375e-20
RPL22	2.17368e-125	0.407393	0.901	0.899	6.23999e-121
RPS12	2.1463e-152	0.407002	0.98	0.991	6.16137e-148
RPS4Y1	1.55052e-78	0.406949	0.729	0.694	4.45109e-74
ITPKB	5.6414e-37	0.406456	0.322	0.24	1.61948e-32
HIST1H2AC	2.70952e-23	0.404471	0.264	0.204	7.77821e-19
NACA	2.94576e-122	0.392288	0.939	0.942	8.4564e-118
BEX2	6.28886e-40	0.385131	0.187	0.1	1.80534e-35
BTBD11	3.86767e-24	0.380977	0.209	0.136	1.11029e-19
RPS18	2.1894e-119	0.380671	0.985	0.989	6.28512e-115
IFITM1	6.36278e-40	0.378999	0.732	0.693	1.82656e-35
RPL8	1.09785e-125	0.377988	0.964	0.976	3.15161e-121
BEX3	1.26389e-67	0.377595	0.112	0.03	3.62824e-63
LINC01619	1.81502e-25	0.375884	0.219	0.154	5.21039e-21
CNST	8.78318e-35	0.36743	0.236	0.158	2.52139e-30
RPL4	5.57374e-84	0.367155	0.86	0.854	1.60005e-79
BEX4	1.67851e-38	0.36521	0.172	0.093	4.81849e-34
AP000787.1	1.23654e-42	0.362523	0.119	0.049	3.54975e-38
RBFOX2	1.03674e-20	0.360165	0.358	0.274	2.97616e-16
RPS28	8.8625e-143	0.358724	0.964	0.983	2.54416e-138
RPS6	2.87961e-105	0.356493	0.968	0.973	8.26649e-101
FTH1	8.58253e-38	0.355153	0.975	0.986	2.46379e-33
RPS23	2.03758e-133	0.354152	0.97	0.984	5.84928e-129
KLF3	9.41686e-29	0.352836	0.311	0.228	2.7033e-24
EZR	2.27786e-53	0.35197	0.852	0.811	6.53906e-49
CH25H	4.25473e-16	0.350773	0.202	0.227	1.22141e-11
ZBTB10	5.32886e-28	0.349805	0.265	0.18	1.52976e-23
C9orf72	8.71768e-33	0.344609	0.176	0.103	2.50258e-28
ANKRD12	7.65256e-32	0.344014	0.684	0.639	2.19682e-27
RPL36	6.01122e-100	0.34364	0.953	0.967	1.72564e-95
TAF4B	1.04129e-30	0.343581	0.149	0.082	2.98922e-26
ABCC1	3.42929e-26	0.339671	0.357	0.294	9.84445e-22
SFXN1	1.7362e-30	0.338927	0.307	0.252	4.98412e-26
RPL5	6.85959e-91	0.338883	0.94	0.946	1.96918e-86
RPL10	3.73374e-78	0.338656	0.989	0.993	1.07184e-73
ZC3H12D	3.90135e-25	0.338127	0.258	0.194	1.11996e-20
S1PR1	2.46359e-32	0.338088	0.17	0.093	7.07223e-28
TNIK	1.56868e-25	0.337216	0.248	0.184	4.5032e-21
HBS1L	1.77195e-29	0.336858	0.265	0.206	5.08675e-25
EEF1G	8.50252e-75	0.334899	0.851	0.84	2.44082e-70
RPS15A	1.96067e-121	0.334457	0.976	0.987	5.6285e-117
RPL30	6.95613e-115	0.334251	0.98	0.989	1.9969e-110
FAM177A1	5.02068e-30	0.334094	0.621	0.598	1.44129e-25
TESPA1	2.65122e-28	0.333854	0.217	0.138	7.61086e-24
SOCS3	4.00604e-27	0.333793	0.513	0.459	1.15001e-22
RPS15	1.06712e-131	0.330754	0.971	0.984	3.06338e-127
LEPROTL1	8.122e-43	0.328764	0.714	0.668	2.33158e-38
FXYD5	1.13946e-46	0.328368	0.782	0.737	3.27106e-42
RPL18	1.51571e-122	0.327688	0.956	0.975	4.35115e-118
VAV3	8.86349e-24	0.327069	0.113	0.061	2.54444e-19
SSH2	3.03008e-29	0.327033	0.365	0.301	8.69845e-25
CYCS	1.84384e-35	0.324642	0.62	0.628	5.29311e-31
HIVEP1	7.53706e-27	0.323698	0.191	0.128	2.16366e-22
HIVEP2	7.01033e-26	0.320883	0.392	0.337	2.01246e-21
THADA	9.6554e-21	0.320817	0.12	0.077	2.77177e-16
AC100810.1	3.11046e-33	0.318348	0.1	0.044	8.92918e-29
RACK1	3.95e-92	0.317743	0.935	0.944	1.13393e-87
ATM	2.57375e-23	0.317502	0.242	0.181	7.38846e-19
RPL3	2.30318e-85	0.31748	0.958	0.972	6.61175e-81
SMDT1	3.22191e-27	0.316133	0.415	0.354	9.24914e-23
CYSLTR1	1.03824e-26	0.315789	0.117	0.066	2.98048e-22
RPS9	1.72324e-89	0.315644	0.951	0.964	4.9469e-85
TNFSF8	1.01786e-18	0.314072	0.21	0.16	2.92198e-14
IFNGR2	4.06466e-41	0.31266	0.114	0.043	1.16684e-36
RGS10	5.91953e-29	0.311433	0.421	0.377	1.69932e-24
RPL28	4.47743e-110	0.3109	0.985	0.992	1.28534e-105
PRKCQ-AS1	2.14561e-22	0.310756	0.262	0.214	6.1594e-18
HAX1	1.05723e-26	0.310756	0.268	0.205	3.03499e-22
STAM	5.14354e-24	0.309188	0.189	0.147	1.47656e-19
RETREG1	4.22011e-33	0.308698	0.125	0.058	1.21147e-28
USP15	1.22588e-26	0.307068	0.484	0.436	3.51913e-22
RPL39	5.14465e-67	0.306008	0.966	0.981	1.47687e-62
ANK3	8.63462e-16	0.305326	0.247	0.195	2.47874e-11
PITPNC1	1.4036e-24	0.303399	0.389	0.348	4.0293e-20
CD7	4.35755e-27	0.302409	0.66	0.578	1.25092e-22
PDE3B	1.04662e-20	0.302255	0.419	0.373	3.00453e-16
MSL3	5.93116e-27	0.302106	0.161	0.101	1.70266e-22
EEF1D	6.95748e-74	0.300732	0.908	0.915	1.99728e-69
SPTBN1	4.64462e-20	0.299749	0.234	0.178	1.33333e-15
BICDL1	9.66628e-20	0.297361	0.34	0.282	2.7749e-15
RASA3	1.51367e-20	0.296601	0.301	0.236	4.3453e-16
SRSF5	3.837e-34	0.292836	0.587	0.537	1.10149e-29
LIMD2	1.2181e-22	0.29241	0.424	0.356	3.49679e-18
RPL34	3.67671e-96	0.291886	0.97	0.985	1.05547e-91
TMEM245	5.15362e-25	0.291667	0.148	0.089	1.47945e-20
CMTM8	1.10195e-19	0.290519	0.161	0.101	3.16337e-15
CDKN2D	1.01509e-20	0.289602	0.413	0.343	2.91402e-16
NSMCE3	8.35878e-26	0.288569	0.371	0.323	2.39955e-21
ATP5PO	1.27384e-23	0.288027	0.364	0.297	3.65682e-19
MAML2	7.30539e-20	0.286324	0.307	0.272	2.09716e-15
STK38	4.7566e-21	0.28453	0.188	0.136	1.36548e-16
TCAF2	2.2608e-21	0.284278	0.2	0.147	6.49009e-17
USP47	5.62281e-24	0.283907	0.328	0.28	1.61414e-19
SATB1	7.98324e-19	0.283354	0.312	0.259	2.29175e-14
RAPGEF6	4.85228e-24	0.283013	0.409	0.365	1.39294e-19
CD27	2.22817e-23	0.282857	0.131	0.072	6.3964e-19
SDCBP	5.63771e-27	0.28204	0.473	0.423	1.61842e-22
ICAM2	3.02118e-19	0.281717	0.229	0.159	8.6729e-15
IGKC	1.08745e-14	0.281336	0.134	0.169	3.12175e-10
RPS4X	2.45204e-77	0.280733	0.967	0.98	7.03907e-73
FASN	9.9161e-29	0.280455	0.109	0.051	2.84662e-24
ALG13	1.37826e-20	0.280133	0.206	0.167	3.95658e-16
BCL11B	2.99688e-26	0.279102	0.476	0.469	8.60315e-22
ZBTB25	4.44348e-20	0.278799	0.227	0.165	1.27559e-15
EEF1A1	3.96299e-41	0.278605	0.993	0.995	1.13766e-36
PFDN5	2.30139e-62	0.278549	0.871	0.869	6.60659e-58
PGAP1	3.82227e-23	0.27823	0.117	0.069	1.09726e-18
NOP53	2.07166e-38	0.277577	0.682	0.645	5.94711e-34
RPS14	2.86258e-76	0.276674	0.966	0.982	8.2176e-72
NSD3	1.3731e-26	0.276608	0.464	0.441	3.94176e-22
C12orf57	4.21283e-34	0.275862	0.62	0.586	1.20938e-29
CENPM	3.70291e-20	0.275085	0.127	0.083	1.063e-15
CFL2	4.8803e-19	0.273313	0.168	0.122	1.40099e-14
MAP3K1	1.32931e-21	0.273304	0.201	0.156	3.81605e-17
MYC	1.74612e-14	0.272431	0.277	0.209	5.01259e-10
ADD3	7.30688e-19	0.272225	0.223	0.179	2.09759e-14
PDCD4	1.32795e-23	0.27152	0.483	0.441	3.81214e-19
AP001011.1	1.14419e-15	0.271297	0.156	0.107	3.28463e-11
USP36	3.66627e-22	0.271182	0.321	0.284	1.05248e-17
ID3	3.01505e-17	0.270634	0.155	0.101	8.6553e-13
SNHG29	7.52678e-40	0.26953	0.781	0.762	2.16071e-35
UGCG	3.66464e-19	0.269045	0.235	0.196	1.05201e-14
IRF2BP2	4.69316e-21	0.269027	0.336	0.297	1.34727e-16
GPCPD1	1.52006e-20	0.268158	0.345	0.301	4.36364e-16
STAT3	1.89571e-27	0.267984	0.632	0.597	5.44203e-23
POR	2.30662e-20	0.267635	0.124	0.089	6.6216e-16
SF1	4.32427e-28	0.266483	0.614	0.577	1.24137e-23
ANP32B	1.85221e-34	0.266066	0.601	0.564	5.31713e-30
EIF3E	4.41162e-36	0.265376	0.552	0.519	1.26644e-31
MCUB	1.51264e-19	0.264482	0.228	0.17	4.34232e-15
LPAR6	1.14974e-11	0.263311	0.186	0.156	3.30054e-07
PRKCA	6.47236e-19	0.26327	0.17	0.123	1.85802e-14
COX4I1	6.60452e-43	0.262929	0.818	0.804	1.89596e-38
Cluster 3 (TOB1hi) top200 markers
CCL20	3.24e-70	1.21281	0.244	0.154	9.31e-66
AREG	5.3e-139	0.896541	0.574	0.431	1.52e-134
IL7R	0	0.850616	0.958	0.815	0
ZFP36L2	0	0.686876	0.988	0.942	0
SAP30	3.96e-111	0.685552	0.399	0.282	1.14e-106
CEBPB	4.63e-121	0.648456	0.506	0.376	1.33e-116
LMNA	6.09e-132	0.624689	0.644	0.509	1.75e-127
VIM	7.62e-297	0.606968	0.979	0.933	2.19e-292
IFNGR1	1.25e-151	0.595963	0.439	0.285	3.6e-147
ANKRD28	5.22e-162	0.547475	0.582	0.402	1.5e-157
ID2	7.36e-113	0.546993	0.603	0.477	2.11e-108
TSC22D3	3.61e-271	0.538525	0.969	0.903	1.04e-266
LINC01871	3.95e-114	0.531419	0.308	0.18	1.14e-109
FKBP11	5.22e-144	0.530198	0.495	0.336	1.5e-139
TXNIP	4.67e-111	0.521137	0.847	0.799	1.34e-106
KLRB1	1.76e-74	0.508395	0.395	0.281	5.04e-70
BTG1	7.56e-275	0.488862	0.995	0.975	2.17e-270
MT1X	3.21e-15	0.486149	0.284	0.256	9.21e-11
RPS10	1.03e-100	0.476107	0.603	0.488	2.96e-96
SRGN	1.13e-254	0.475239	0.984	0.95	3.24e-250
SMIM3	4.77e-108	0.473555	0.24	0.123	1.37e-103
ZBTB16	8.17e-108	0.460382	0.275	0.15	2.34e-103
MT2A	1.29e-24	0.454398	0.602	0.56	3.71e-20
TIPARP	5.26e-103	0.443592	0.549	0.414	1.51e-98
ANXA1	1.32e-109	0.443399	0.819	0.704	3.78e-105
TOB1	8.32e-71	0.438561	0.489	0.393	2.39e-66
RPL41	1.56e-119	0.426455	0.969	0.947	4.49e-115
STOM	8e-80	0.421055	0.479	0.366	2.3e-75
CH25H	1.26e-55	0.413389	0.272	0.179	3.61e-51
RBMS1	1.74e-84	0.402524	0.437	0.321	4.99e-80
PFKFB3	4.82e-59	0.400336	0.503	0.411	1.38e-54
ZFP36	5.95e-176	0.397879	0.976	0.927	1.71e-171
BIRC3	6.9e-79	0.395396	0.715	0.628	1.98e-74
HSPA5	1.64e-117	0.39403	0.817	0.726	4.72e-113
SSR3	1.31e-85	0.391113	0.404	0.289	3.77e-81
RPS20	3.71e-86	0.389907	0.775	0.731	1.06e-81
H2AFZ	3.33e-84	0.38932	0.755	0.669	9.56e-80
MANF	1.24e-72	0.371752	0.273	0.176	3.57e-68
METRNL	1.23e-81	0.37124	0.42	0.293	3.52e-77
CRYBG1	1.49e-88	0.369472	0.65	0.529	4.28e-84
GPR171	2.77e-59	0.368804	0.38	0.278	7.97e-55
TGIF1	3.99e-66	0.368544	0.353	0.25	1.15e-61
CXCR4	3.05e-128	0.36568	0.941	0.884	8.74e-124
PRDM1	1.02e-79	0.354219	0.653	0.535	2.92e-75
GPR65	1.28e-65	0.353563	0.378	0.28	3.67e-61
TGFB1	9.57e-76	0.345293	0.735	0.631	2.75e-71
MCAM	4.67e-67	0.340474	0.184	0.099	1.34e-62
XBP1	4.01e-69	0.340008	0.57	0.464	1.15e-64
PDE4D	2.13e-67	0.339398	0.486	0.372	6.12e-63
CD99	4.98e-40	0.337845	0.698	0.63	1.43e-35
GLUL	2.51e-52	0.337734	0.407	0.307	7.21e-48
CEBPD	3.08e-36	0.333944	0.239	0.168	8.83e-32
RPS29	8.72e-90	0.333824	0.941	0.917	2.5e-85
MT-ND2	3.67e-66	0.330857	0.734	0.66	1.05e-61
RIPK2	2.4e-43	0.327851	0.25	0.178	6.89e-39
RPS16	1.64e-161	0.327843	0.972	0.945	4.7e-157
EZR	1.23e-69	0.326938	0.847	0.788	3.53e-65
FTH1	1.23e-107	0.322382	0.993	0.977	3.53e-103
RGCC	2.37e-37	0.320794	0.652	0.6	6.81e-33
DNAJB9	8.51e-56	0.320108	0.37	0.278	2.44e-51
SNHG16	1.64e-56	0.319064	0.467	0.377	4.7e-52
SERPINB9	1.01e-36	0.318877	0.45	0.386	2.91e-32
HSP90B1	4.21e-65	0.314079	0.673	0.582	1.21e-60
PERP	2.91e-52	0.313432	0.209	0.134	8.35e-48
CXCR3	5.23e-36	0.311052	0.165	0.122	1.5e-31
MAFF	1.3e-51	0.307037	0.316	0.225	3.73e-47
LUZP1	2.41e-54	0.306384	0.382	0.289	6.93e-50
PPP1CB	1.43e-61	0.303667	0.646	0.558	4.11e-57
SYTL3	1.5e-74	0.303504	0.721	0.615	4.31e-70
CITED2	9.51e-44	0.302496	0.618	0.532	2.73e-39
MAF	4.55e-30	0.299735	0.41	0.338	1.31e-25
PHLDA1	1.19e-43	0.299158	0.545	0.451	3.41e-39
RPL36AL	1.91e-99	0.293358	0.857	0.789	5.47e-95
ATP1A1	1.78e-45	0.293267	0.509	0.425	5.12e-41
HERPUD1	1.02e-47	0.292634	0.652	0.572	2.91e-43
AC016831.1	6.18e-51	0.292	0.25	0.164	1.78e-46
RPL38	8.14e-88	0.291228	0.888	0.844	2.34e-83
KLF9	3e-49	0.289955	0.424	0.33	8.6e-45
PTMA	3.32e-180	0.286764	0.997	0.983	9.53e-176
GPR183	1.54e-42	0.286488	0.532	0.45	4.42e-38
TUBA1B	3.08e-64	0.283931	0.703	0.611	8.84e-60
RPL13A	7.58e-54	0.283272	0.91	0.897	2.18e-49
FOSL2	6.36e-44	0.282674	0.466	0.381	1.82e-39
HNRNPDL	3.04e-83	0.280968	0.856	0.797	8.73e-79
PTGER4	6.44e-49	0.280496	0.651	0.564	1.85e-44
SELENOS	5.99e-44	0.279718	0.226	0.154	1.72e-39
TRAM1	6.91e-48	0.279505	0.414	0.329	1.98e-43
CD63	5.52e-45	0.279054	0.368	0.282	1.59e-40
ITM2C	9.43e-47	0.278721	0.182	0.111	2.71e-42
IFITM2	2.5e-109	0.278502	0.908	0.835	7.18e-105
MT-ND3	1.46e-52	0.278235	0.664	0.575	4.18e-48
GABARAPL1	1.03e-43	0.277401	0.422	0.335	2.94e-39
HNRNPUL1	7.03e-43	0.274421	0.488	0.41	2.02e-38
SNHG12	2.21e-45	0.272926	0.463	0.373	6.34e-41
HPGD	3.32e-39	0.272365	0.125	0.07	9.54e-35
MGAT4A	2.04e-34	0.271367	0.425	0.357	5.85e-30
FKBP5	5.4e-44	0.271336	0.569	0.491	1.55e-39
MT-CO2	4e-56	0.271003	0.901	0.867	1.15e-51
TPT1	3.02e-158	0.270941	0.996	0.991	8.67e-154
RPS17	4.47e-46	0.270773	0.625	0.575	1.28e-41
CALM2	3.32e-57	0.269907	0.737	0.657	9.53e-53
RPL27A	1.55e-51	0.267382	0.89	0.877	4.45e-47
PPIB	7.37e-51	0.267352	0.624	0.538	2.11e-46
AC058791.1	3.59e-33	0.266847	0.379	0.299	1.03e-28
SLC7A5	1.2e-40	0.263937	0.474	0.385	3.43e-36
NFIL3	2.74e-37	0.263444	0.254	0.181	7.86e-33
MT1E	8.58e-09	0.260509	0.111	0.105	0.000246163
TAGLN2	5.32e-41	0.258799	0.785	0.722	1.53e-36
SEC61B	2.38e-41	0.258674	0.473	0.392	6.83e-37
EIF4A1	2.79e-68	0.256755	0.825	0.752	8.01e-64
RPL9	1.12e-110	0.256213	0.971	0.935	3.23e-106
ZFAS1	7.38e-52	0.255473	0.747	0.692	2.12e-47
TP53BP2	1.63e-34	0.255468	0.352	0.281	4.67e-30
RPL23A	8.85e-78	0.253542	0.954	0.925	2.54e-73
NFE2L2	2.62e-43	0.252783	0.538	0.451	7.51e-39
SEC14L1	7.17e-38	0.252138	0.292	0.217	2.06e-33
SUPV3L1	2.58e-28	0.25199	0.219	0.159	7.42e-24
PNP	1.88e-31	0.250348	0.293	0.235	5.4e-27
SEC62	8.58e-34	0.250014	0.394	0.322	2.46e-29
KLF6	8.77e-88	0.249677	0.969	0.93	2.52e-83
SYTL2	2.62e-29	0.249392	0.292	0.228	7.51e-25
ARF6	1.18e-46	0.245917	0.661	0.58	3.39e-42
ATF4	1.4e-38	0.245703	0.42	0.338	4.02e-34
RPL21	1.51e-89	0.245384	0.968	0.941	4.34e-85
TUBB4B	8.68e-46	0.244825	0.575	0.489	2.49e-41
ELK3	7.34e-33	0.244472	0.24	0.177	2.11e-28
MYBL1	8.88e-40	0.24306	0.146	0.086	2.55e-35
LDHA	4.28e-47	0.242648	0.738	0.655	1.23e-42
TXN	1.74e-43	0.241697	0.563	0.466	4.99e-39
DDX21	7.15e-41	0.24164	0.567	0.485	2.05e-36
PMEPA1	1.13e-39	0.239893	0.139	0.083	3.23e-35
KIF5C	1.53e-37	0.238706	0.202	0.135	4.38e-33
SPRY1	4.58e-30	0.237821	0.111	0.065	1.31e-25
STMN1	4.51e-32	0.236448	0.357	0.28	1.3e-27
AC020916.1	3e-42	0.235903	0.408	0.315	8.61e-38
CD53	2.1e-43	0.233607	0.657	0.574	6.01e-39
EIF1	6.07e-120	0.233337	0.989	0.971	1.74e-115
S100A10	4.7e-56	0.23303	0.81	0.73	1.35e-51
KDSR	1.62e-29	0.232889	0.277	0.214	4.64e-25
RNF19A	7.68e-41	0.232202	0.7	0.631	2.21e-36
SPCS2	3.14e-30	0.231744	0.323	0.264	9.01e-26
RGS1	5.24e-25	0.231074	0.658	0.594	1.5e-20
TNFAIP3	2.14e-31	0.230719	0.918	0.886	6.14e-27
RUNX3	2.27e-33	0.228984	0.545	0.469	6.52e-29
RPL36A	6.75e-76	0.22858	0.92	0.885	1.94e-71
SLAMF1	1e-22	0.225159	0.336	0.281	2.88e-18
ORAI1	4.65e-28	0.224557	0.334	0.266	1.34e-23
RPL7	4.18e-50	0.224394	0.843	0.802	1.2e-45
CD44	4.42e-43	0.224381	0.841	0.793	1.27e-38
SYPL1	1.74e-28	0.224357	0.28	0.219	5e-24
LGALS3	1.72e-24	0.224153	0.368	0.304	4.95e-20
MYADM	1.41e-25	0.223869	0.453	0.385	4.06e-21
CDKN1A	1.62e-30	0.223456	0.51	0.433	4.66e-26
HNRNPAB	1.78e-32	0.222593	0.398	0.324	5.1e-28
GLO1	2.78e-28	0.222276	0.164	0.116	7.98e-24
ARID5A	1.18e-32	0.221975	0.512	0.435	3.38e-28
IL2RA	6.68e-30	0.221804	0.223	0.159	1.92e-25
SOCS1	2e-27	0.221592	0.531	0.463	5.74e-23
CREM	3.93e-47	0.221414	0.783	0.71	1.13e-42
ARF4	2.05e-32	0.221125	0.431	0.362	5.89e-28
SNHG6	5.99e-39	0.22092	0.622	0.559	1.72e-34
FAM177A1	1.47e-35	0.220197	0.64	0.565	4.23e-31
POLR2L	1.3e-27	0.219897	0.382	0.323	3.74e-23
MT-ATP6	2.36e-44	0.21957	0.728	0.661	6.77e-40
LRRFIP1	8.4e-34	0.218962	0.651	0.592	2.41e-29
RORA	8.53e-38	0.218503	0.703	0.625	2.45e-33
BMI1	4.08e-32	0.218333	0.182	0.124	1.17e-27
RPL17	5.28e-73	0.218228	0.969	0.945	1.52e-68
DDIT4	1.45e-64	0.217819	0.901	0.837	4.18e-60
MYC	5.04e-13	0.2168	0.238	0.2	1.45e-08
PIM1	6.06e-25	0.21673	0.491	0.428	1.74e-20
HMGB2	6.83e-21	0.216398	0.631	0.62	1.96e-16
DANCR	7.93e-27	0.216305	0.262	0.21	2.28e-22
KIF13B	2.68e-26	0.216301	0.269	0.208	7.7e-22
ST3GAL1	1.54e-26	0.216023	0.363	0.3	4.41e-22
PRXL2C	1.18e-28	0.215696	0.243	0.18	3.39e-24
RABAC1	8.77e-28	0.214666	0.471	0.403	2.52e-23
MT-ND4	9.18e-34	0.212409	0.729	0.68	2.63e-29
SKIL	9.88e-27	0.211207	0.304	0.239	2.84e-22
CCR6	3.69e-23	0.211193	0.168	0.12	1.06e-18
CSNK1D	1.2e-28	0.210997	0.322	0.255	3.43e-24
GLIPR1	3e-23	0.210783	0.426	0.369	8.61e-19
RPLP0	6.16e-74	0.210602	0.972	0.938	1.77e-69
ADGRE5	1.01e-18	0.209765	0.6	0.554	2.89e-14
MTHFD2	3.22e-24	0.209513	0.483	0.421	9.26e-20
ABRACL	8.39e-25	0.208922	0.43	0.374	2.41e-20
CNOT6L	2.45e-30	0.208172	0.6	0.535	7.03e-26
PIM2	1.63e-23	0.208038	0.507	0.441	4.67e-19
ARL4C	5.01e-33	0.207457	0.712	0.647	1.44e-28
CLDND1	7.05e-26	0.207361	0.482	0.416	2.03e-21
RPL37A	2.15e-50	0.207248	0.907	0.877	6.16e-46
AKAP13	9.67e-33	0.206958	0.748	0.688	2.78e-28
NIBAN1	1.02e-30	0.20646	0.47	0.393	2.93e-26
MARH9	3.83e-28	0.206446	0.175	0.122	1.1e-23
RPLP2	3.19e-93	0.206275	0.985	0.964	9.16e-89
CD96	2.87e-22	0.205999	0.521	0.475	8.24e-18
NDRG1	9.37e-26	0.204839	0.244	0.186	2.69e-21
BCL6	1.26e-25	0.203715	0.386	0.318	3.61e-21
RPS2	5.65e-84	0.203398	0.986	0.97	1.62e-79
ATP6V0C	2.26e-34	0.202875	0.655	0.586	6.49e-30
Cluster 4 (HSPhi) top200 markers
HSPA6	0	3.69913	0.439	0.066	0
HSPA1B	0	2.82042	0.91	0.411	0
DNAJB1	0	2.73568	0.94	0.624	0
HSPA1A	0	2.59672	0.919	0.503	0
SERPINH1	0	2.26089	0.305	0.044	0
HSPB1	0	2.20785	0.675	0.317	0
HSPH1	0	2.20576	0.75	0.371	0
HSP90AA1	0	2.07267	0.97	0.893	0
ZFAND2A	0	2.00993	0.371	0.11	0
BAG3	0	1.9839	0.467	0.208	0
HSPA8	0	1.54162	0.938	0.857	0
NR4A1	0	1.51938	0.631	0.346	0
HSPD1	0	1.42601	0.81	0.666	0
HSPE1	0	1.40835	0.786	0.605	0
DNAJA4	0	1.38429	0.313	0.092	0
DUSP1	0	1.32176	0.905	0.771	0
DNAJB4	0	1.21611	0.293	0.074	0
GADD45B	0	1.17058	0.766	0.603	0
HSP90AB1	0	1.16384	0.936	0.93	0
PPP1R15A	0	1.15566	0.884	0.768	0
CACYBP	0	1.07854	0.576	0.397	0
UBB	0	1.06516	0.831	0.772	0
JUN	0	1.04889	0.964	0.912	0
TNFSF14	2.0355e-233	1.04777	0.219	0.064	5.84331e-229
CSF1	9.72013e-204	1.03449	0.189	0.049	2.79036e-199
FKBP4	4.44405e-240	1.00366	0.382	0.211	1.27575e-235
FP236383.3	4.13248e-110	0.989461	0.468	0.306	1.18631e-105
RGS2	5.02705e-198	0.96241	0.428	0.263	1.44312e-193
DNAJA1	0	0.962027	0.742	0.663	0
CHORDC1	3.35676e-237	0.95079	0.407	0.235	9.63624e-233
TNF	1.23405e-149	0.89963	0.518	0.403	3.54258e-145
BTG2	9.7678e-273	0.878015	0.697	0.553	2.80404e-268
FP671120.4	5.63664e-95	0.856103	0.379	0.235	1.61811e-90
EGR1	1.16066e-160	0.849746	0.272	0.119	3.33191e-156
TNFSF9	3.84764e-112	0.844943	0.21	0.099	1.10454e-107
IER5	2.36154e-184	0.839038	0.497	0.354	6.77926e-180
MOB4	2.28833e-181	0.837728	0.346	0.201	6.56911e-177
IER5L	2.26654e-156	0.818234	0.289	0.153	6.50656e-152
ATF3	1.49012e-133	0.811908	0.388	0.254	4.27769e-129
NEU1	1.30331e-159	0.803442	0.362	0.223	3.74141e-155
CD83	7.70262e-123	0.796925	0.345	0.209	2.21119e-118
IGKC	2.80604e-36	0.756171	0.172	0.162	8.05529e-32
MRPL18	1.67368e-173	0.751724	0.264	0.124	4.80463e-169
CLK1	9.92209e-214	0.743646	0.589	0.48	2.84833e-209
UBC	5.37031e-128	0.715803	0.977	0.98	1.54166e-123
DEDD2	9.04547e-187	0.706141	0.305	0.148	2.59668e-182
NABP1	2.84252e-106	0.702904	0.34	0.247	8.16003e-102
IER3	4.62457e-71	0.683059	0.229	0.139	1.32758e-66
FOSB	1.85264e-131	0.668445	0.655	0.51	5.31839e-127
ID3	1.88355e-70	0.667293	0.17	0.089	5.4071e-66
IER2	1.3898e-168	0.662693	0.791	0.727	3.98971e-164
IGLC2	9.37583e-30	0.655277	0.123	0.093	2.69152e-25
BTBD9	4.14706e-75	0.652588	0.207	0.128	1.1905e-70
DOK2	3.91678e-136	0.649608	0.396	0.273	1.12439e-131
ABHD3	1.98021e-113	0.637003	0.292	0.169	5.68458e-109
G0S2	1.13436e-31	0.634303	0.113	0.076	3.25641e-27
FOS	5.0353e-113	0.619812	0.896	0.878	1.44548e-108
CCL4L2	4.04223e-20	0.618063	0.13	0.106	1.1604e-15
TCP1	1.19799e-135	0.606305	0.425	0.315	3.43907e-131
USPL1	1.59585e-118	0.589558	0.195	0.087	4.58119e-114
DUSP2	1.6924e-103	0.58266	0.782	0.762	4.85839e-99
SLC5A3	1.13766e-54	0.579225	0.184	0.141	3.26589e-50
MXD1	9.8077e-100	0.57806	0.236	0.13	2.8155e-95
IRF1	7.87351e-94	0.577422	0.611	0.512	2.26025e-89
NFKBIA	1.11623e-142	0.563772	0.938	0.936	3.20436e-138
STIP1	1.97033e-93	0.549951	0.318	0.219	5.65623e-89
DNAJB6	5.04688e-118	0.547733	0.574	0.51	1.44881e-113
CCT4	2.69339e-109	0.544388	0.411	0.324	7.73193e-105
HOOK2	5.3796e-81	0.541214	0.331	0.211	1.54432e-76
JUNB	3.80734e-161	0.540161	0.957	0.943	1.09297e-156
ZC3H12A	2.87018e-94	0.539871	0.373	0.301	8.23943e-90
AHSA1	3.9103e-107	0.537994	0.272	0.165	1.12253e-102
ANKRD37	6.91787e-74	0.525358	0.16	0.082	1.98591e-69
CD69	3.28831e-124	0.517954	0.896	0.871	9.43974e-120
BCAS2	2.74981e-80	0.515923	0.409	0.329	7.89388e-76
TAGAP	3.25514e-74	0.514794	0.509	0.413	9.34453e-70
NKRF	4.58682e-113	0.510421	0.168	0.067	1.31674e-108
CXCL8	3.87325e-18	0.509527	0.117	0.118	1.11189e-13
BCL2A1	7.65889e-08	0.501039	0.223	0.224	0.00219864
TUBA1A	5.61954e-77	0.494386	0.542	0.491	1.6132e-72
TRA2B	6.97242e-98	0.494102	0.577	0.507	2.00157e-93
NFKBIZ	2.40283e-74	0.489778	0.553	0.452	6.89779e-70
SRSF7	1.66902e-100	0.48918	0.793	0.746	4.79125e-96
RHOB	1.25752e-46	0.480475	0.32	0.246	3.60997e-42
HNRNPU	5.54037e-90	0.478588	0.727	0.688	1.59047e-85
AC009313.1	1.74876e-72	0.477935	0.149	0.067	5.02016e-68
SNAP23	4.04228e-75	0.470707	0.183	0.101	1.16042e-70
CGAS	9.80346e-76	0.466693	0.212	0.128	2.81428e-71
TSPYL2	3.45777e-78	0.462573	0.709	0.643	9.92621e-74
AL499604.1	4.32489e-48	0.461358	0.298	0.236	1.24155e-43
AC025259.3	7.5378e-81	0.459348	0.163	0.069	2.16388e-76
INTS6	2.49412e-55	0.454338	0.361	0.314	7.15986e-51
MRPS6	1.01917e-62	0.445426	0.283	0.223	2.92574e-58
ICAM1	5.48123e-39	0.440617	0.167	0.112	1.5735e-34
SLC20A1	3.25047e-53	0.439363	0.325	0.261	9.33113e-49
SOD1	3.59544e-85	0.433461	0.669	0.658	1.03214e-80
MIR222HG	4.84074e-51	0.432912	0.148	0.084	1.38963e-46
MT-ATP8	1.92327e-43	0.431955	0.405	0.326	5.52112e-39
NFKBIE	1.29316e-77	0.424457	0.16	0.076	3.71228e-73
SOCS3	1.79927e-56	0.423388	0.53	0.446	5.16516e-52
XCL1	3.90167e-12	0.420862	0.101	0.074	1.12005e-07
IFNG	2.91364e-23	0.408897	0.282	0.245	8.3642e-19
NFKBID	1.16677e-42	0.398023	0.256	0.179	3.34946e-38
GADD45G	1.28211e-31	0.394536	0.307	0.265	3.68056e-27
VMP1	1.29885e-46	0.393117	0.38	0.364	3.7286e-42
HIST3H2A	1.06141e-42	0.384304	0.209	0.145	3.04698e-38
KLF10	2.01591e-45	0.383211	0.297	0.225	5.78708e-41
PTGES3	9.63267e-97	0.381181	0.68	0.673	2.76525e-92
GRK5	1.6652e-45	0.379746	0.215	0.153	4.7803e-41
IFITM3	8.0882e-15	0.379106	0.124	0.122	2.32188e-10
HIST2H2BF	7.6295e-61	0.376708	0.118	0.05	2.1902e-56
ATM	8.16443e-45	0.372197	0.248	0.17	2.34376e-40
RASD1	1.8838e-30	0.370417	0.159	0.111	5.40783e-26
IGHG1	4.58738e-22	0.369303	0.121	0.086	1.3169e-17
HSPA2	2.2311e-44	0.368549	0.174	0.11	6.40481e-40
SQSTM1	8.63443e-42	0.368086	0.61	0.591	2.47869e-37
NR4A2	4.72212e-43	0.366431	0.599	0.548	1.35558e-38
ERN1	3.73696e-41	0.363942	0.456	0.388	1.07277e-36
PPP1R10	4.1679e-42	0.363178	0.381	0.343	1.19648e-37
IFI30	6.50901e-21	0.36133	0.12	0.084	1.86854e-16
AC022217.3	1.387e-56	0.360731	0.132	0.061	3.98165e-52
CDC42EP3	7.80085e-46	0.359152	0.347	0.3	2.23939e-41
SGK1	4.49269e-30	0.357688	0.297	0.241	1.28972e-25
CDC14A	1.36603e-37	0.34831	0.368	0.303	3.92146e-33
PHYH	1.74137e-52	0.347523	0.127	0.066	4.99895e-48
GLA	1.63858e-37	0.345521	0.146	0.101	4.70386e-33
ZBTB20	1.27179e-37	0.342809	0.228	0.158	3.65094e-33
TAF7	1.15023e-48	0.341277	0.382	0.34	3.30198e-44
LTB	2.53073e-33	0.340669	0.486	0.421	7.26497e-29
RGS16	4.06885e-27	0.34048	0.177	0.121	1.16805e-22
C17orf67	2.47913e-55	0.338609	0.106	0.046	7.11685e-51
ARL4D	1.24921e-65	0.334388	0.1	0.036	3.58611e-61
GPBP1	1.91393e-75	0.334383	0.64	0.636	5.49433e-71
IL23A	4.4885e-48	0.328943	0.128	0.066	1.28851e-43
MAT2A	6.10762e-31	0.32585	0.258	0.211	1.75332e-26
ATP2C1	6.06395e-45	0.32534	0.135	0.078	1.74078e-40
TRAF1	4.51451e-23	0.32189	0.377	0.31	1.29598e-18
RBFOX2	6.23467e-47	0.321747	0.369	0.258	1.78979e-42
ARRDC3	5.50279e-33	0.32113	0.207	0.143	1.57968e-28
IGHA1	1.60751e-20	0.316207	0.104	0.083	4.61469e-16
PLK2	5.07311e-39	0.315671	0.124	0.066	1.45634e-34
DDX58	1.2247e-39	0.314581	0.103	0.059	3.51574e-35
HIST1H2BJ	4.02179e-46	0.311319	0.102	0.048	1.15453e-41
ARIH1	1.72697e-40	0.310973	0.438	0.385	4.95761e-36
H3F3B	2.43766e-53	0.308592	0.963	0.975	6.99778e-49
ZNF10	4.86351e-36	0.307346	0.164	0.101	1.39617e-31
LTA	4.78478e-24	0.306983	0.149	0.105	1.37357e-19
SOD2	3.49091e-17	0.305704	0.478	0.508	1.00214e-12
DDIT3	2.25547e-25	0.303979	0.228	0.177	6.47477e-21
ELOVL5	5.04395e-40	0.30254	0.442	0.428	1.44797e-35
NUDC	1.78873e-40	0.300763	0.236	0.191	5.13491e-36
ARHGAP26	4.03434e-32	0.300189	0.243	0.205	1.15814e-27
NUFIP2	7.79182e-43	0.299294	0.389	0.368	2.2368e-38
AL035530.2	5.49754e-43	0.298999	0.114	0.058	1.57818e-38
TECR	6.96983e-38	0.295819	0.333	0.292	2.00083e-33
SCGB3A1	5.82838e-12	0.295377	0.108	0.079	1.67315e-07
AC243960.1	5.52474e-23	0.294542	0.274	0.223	1.58599e-18
SESN1	2.99899e-23	0.294194	0.255	0.194	8.60919e-19
CPEB4	4.87592e-39	0.293859	0.112	0.066	1.39973e-34
NFKB1	1.90646e-30	0.290527	0.489	0.464	5.47287e-26
EIF5	6.23441e-47	0.290369	0.534	0.494	1.78971e-42
APOO	3.10911e-36	0.290335	0.359	0.262	8.92532e-32
HEXIM1	8.1837e-30	0.290059	0.275	0.253	2.34929e-25
HSPA4	1.52132e-34	0.289182	0.219	0.169	4.36726e-30
TNFAIP8	2.72412e-36	0.288412	0.428	0.391	7.82013e-32
ARHGAP15	7.40801e-26	0.287832	0.421	0.352	2.12662e-21
UBE2S	1.74919e-39	0.284951	0.484	0.475	5.02139e-35
RASSF3	7.21479e-28	0.283771	0.178	0.134	2.07115e-23
TSPYL4	4.42168e-34	0.283406	0.128	0.075	1.26933e-29
CCL3L1	7.2614e-12	0.282346	0.108	0.08	2.08453e-07
HELB	2.33855e-30	0.28216	0.299	0.252	6.71327e-26
ZC3HAV1	1.66719e-40	0.281066	0.592	0.582	4.78602e-36
TCF7	2.75232e-27	0.279363	0.307	0.244	7.90109e-23
CDKN1C	2.80092e-21	0.27785	0.142	0.112	8.04061e-17
EPM2AIP1	1.78784e-24	0.277553	0.169	0.131	5.13235e-20
SNHG5	3.11983e-29	0.277037	0.468	0.445	8.95608e-25
AC016074.2	8.16271e-17	0.276414	0.117	0.086	2.34327e-12
FBXL14	4.53226e-35	0.274999	0.102	0.052	1.30108e-30
MORF4L2	4.65681e-35	0.272803	0.323	0.289	1.33683e-30
FTL	1.03942e-19	0.272505	0.954	0.968	2.98386e-15
H2AFX	1.49766e-30	0.271681	0.26	0.223	4.29932e-26
PRKACB	1.31972e-29	0.271419	0.145	0.097	3.78853e-25
KLRG1	1.39459e-33	0.27126	0.124	0.075	4.00346e-29
SYNE1	6.07225e-23	0.270969	0.15	0.116	1.74316e-18
SERTAD1	1.10879e-33	0.269082	0.344	0.313	3.18302e-29
AC136475.3	3.87449e-22	0.268544	0.203	0.159	1.11225e-17
SCML4	1.63202e-27	0.266341	0.166	0.111	4.68504e-23
INPP4B	1.79497e-22	0.266165	0.315	0.252	5.15281e-18
AC025164.1	1.61344e-21	0.265998	0.32	0.293	4.6317e-17
CKS2	1.09978e-34	0.264527	0.27	0.26	3.15713e-30
TRIM26	1.8924e-32	0.264363	0.153	0.108	5.43251e-28
ZNF106	3.90893e-29	0.262437	0.148	0.107	1.12214e-24
UTRN	1.65397e-25	0.261636	0.286	0.244	4.74805e-21
PPP1R2	7.63164e-40	0.261405	0.55	0.551	2.19081e-35
PLAUR	7.20365e-18	0.261385	0.144	0.12	2.06795e-13
C5orf56	5.38012e-24	0.258946	0.205	0.155	1.54447e-19
MACF1	3.57271e-20	0.254081	0.333	0.29	1.02562e-15
ATF7IP2	1.02989e-24	0.252765	0.124	0.095	2.95649e-20
TSEN34	5.49779e-32	0.25033	0.113	0.068	1.57825e-27
PPP1R15B	9.08939e-28	0.250063	0.358	0.337	2.60929e-23

## Sheet: table S5 IPF vs Con HSPhi CD4T 
table S5. Differentially expressed genes in IPF vs. Control HSPhi CD4 T cells
Gene	Avg_log2FC	Adjusted_pValue
FP236383.3	6.70474	0
FP671120.4	3.10361	1.77821e-268
HSPA6	2.83042	3.43486e-130
SERPINH1	2.57589	3.13247e-127
HSPA8	2.26368	0
BAG3	2.23314	1.32e-128
RBFOX2	2.17751	2.92856e-247
HSPA1A	2.17011	0
NR4A1	2.08903	4.00319e-169
APOO	2.05041	2.16133e-220
IGKC	2.04373	1.27954e-60
HSP90AA1	1.96594	1.22849e-267
HSPB1	1.93848	7.91811e-169
IGLC2	1.85338	1.35274e-40
HSPD1	1.81405	1.97174e-198
DNAJB1	1.79824	3.30099e-241
HSPH1	1.77911	6.23781e-184
HSPA1B	1.77276	9.58021e-159
ZFAND2A	1.74847	7.34656e-70
LTB	1.59196	4.48307e-127
HSPE1	1.58792	4.80695e-144
DNAJA4	1.50594	3.56785e-86
TRAF1	1.44768	6.59747e-105
HSP90AB1	1.37185	5.84032e-164
NFKB1	1.2983	1.72711e-75
CSF1	1.2982	9.85508e-60
HOOK2	1.29285	8.76553e-104
IGLC1	1.27411	2.23595e-37
BTBD9	1.13573	1.99067e-49
PLAAT4	1.13158	3.75061e-77
CCR7	1.12128	3.1994e-73
CD74	1.11149	2.40326e-109
CAMK4	1.07377	2.32972e-68
BACH2	1.07162	3.96184e-56
ABHD3	1.06536	3.33833e-61
DENND4A	1.06132	8.58281e-59
MOB4	1.05894	7.44266e-52
BICDL1	1.03712	1.39617e-75
HIST1H2AC	1.0305	2.2848e-50
ELOVL5	1.02592	1.21391e-53
AC009313.1	1.00142	2.69338e-86
TAGAP	1.00134	3.03381e-64
AC138123.1	0.979077	7.05563e-111
IGHG1	0.966842	2.08462e-32
DNAJA1	0.965885	7.14304e-59
CD83	0.964232	6.61149e-47
SIK3	0.960234	7.84755e-49
ZC3H12A	0.939362	9.80022e-54
RORA-AS1	0.93365	2.58067e-76
SCGB3A1	0.929141	2.87519e-51
AC025259.3	0.925108	4.13468e-73
CD52	0.921702	1.69061e-52
PTPRCAP	0.916553	3.61078e-98
MRPS6	0.911417	2.25078e-40
DNAJB4	0.902222	2.58266e-37
GBP2	0.885893	1.2925e-56
SQSTM1	0.884947	4.78277e-45
UBB	0.879805	4.51549e-56
TNFSF14	0.874226	1.12361e-29
FKBP4	0.871096	2.27639e-47
FAAH2	0.841596	4.84692e-43
CRIP1	0.839618	1.7774e-37
CNN2	0.833045	2.84032e-60
MT-ATP8	0.815682	3.42555e-34
ACTB	0.812238	7.13316e-63
ARHGAP15	0.807522	1.01385e-47
AC022217.3	0.803267	4.90156e-72
FLT3LG	0.802365	1.12227e-51
CHORDC1	0.801323	2.21877e-31
NR4A2	0.796964	9.06855e-30
IFITM1	0.7902	3.85297e-76
INPP4B	0.789959	1.01171e-49
CDC14A	0.785057	3.30773e-39
TNFAIP8	0.78452	1.94347e-36
CACYBP	0.774474	8.59371e-59
LINC01619	0.76841	8.3376e-41
AP001011.1	0.765125	4.00315e-74
HERC1	0.763537	1.70589e-34
DOK2	0.760116	2.1362e-41
MRPL18	0.758767	3.85955e-51
PPP1R15A	0.747157	1.24773e-44
GSTK1	0.738187	4.47133e-43
MAPRE2	0.734486	3.07796e-40
SLC5A3	0.732227	4.57478e-11
ANXA6	0.727095	5.05565e-47
CORO1A	0.717133	1.02682e-33
ZC3H12D	0.709053	1.75436e-41
UBC	0.705426	5.00751e-39
NELL2	0.691853	6.46824e-39
GRK5	0.683901	3.03972e-30
BTBD11	0.681046	4.24185e-33
GADD45B	0.679173	2.13892e-31
REL	0.6704	5.29971e-42
NFAT5	0.669457	4.9419e-29
LIMD2	0.668443	8.6192e-42
CCT4	0.666194	4.62381e-26
TMSB4X	0.66619	2.95708e-68
CD5	0.660672	1.15466e-31
SOD1	0.660531	5.60568e-26
GBP5	0.659475	1.38119e-23
ABLIM1	0.659064	5.49694e-33
SELL	0.658635	1.85164e-35
SKAP1	0.657299	1.33454e-34
HNRNPLL	0.65716	7.89913e-23
LSP1	0.656799	1.49014e-34
PRKCH	0.654565	8.49486e-32
IL32	0.651988	6.87213e-33
ANXA1	0.651686	1.33096e-18
TANK	0.650499	6.90408e-28
HCST	0.649597	1.0348e-28
NFKBID	0.647103	6.08136e-28
ANKRD37	0.645857	4.22529e-18
MACF1	0.64541	6.6732e-34
TCF7	0.643551	2.42349e-29
SH3BGRL3	0.626732	4.2193e-44
USPL1	0.624213	3.70431e-28
TAGLN2	0.623037	9.77818e-31
DEDD2	0.615223	1.70198e-33
CHST11	0.614807	3.71115e-15
LTA	0.614589	2.18018e-20
HIST3H2A	0.61425	4.8737e-20
AL135905.2	0.612182	1.62907e-39
TNFRSF4	0.609151	5.11543e-25
RAB11A	0.607274	9.28829e-28
DLEU2	0.601386	8.08749e-32
ISG15	0.599776	1.82229e-10
GNA15	0.591809	9.8538e-38
SEPTIN6	0.583228	3.03193e-26
STAT4	0.582225	6.28144e-17
ICOS	0.582062	8.73675e-15
HIGD2A	0.579492	2.42306e-25
ATP5MC2	0.579073	1.46494e-31
CREB1	0.578356	3.22752e-27
LDHB	0.576716	5.66637e-28
GNG2	0.574703	1.71405e-21
TMEM131L	0.571686	2.08792e-24
DNAJB6	0.569486	2.44949e-21
FXYD5	0.567562	6.10825e-35
LMNA	0.564765	1.09746e-07
RASSF3	0.562386	1.3508e-17
RAC2	0.56174	2.74755e-30
NEDD9	0.558742	3.26488e-19
ZBTB20	0.555563	9.03396e-23
ATXN1	0.554261	6.66763e-17
CCL5	0.554036	3.85065e-10
ARIH1	0.553969	5.02351e-21
ERCC1	0.550788	2.63061e-37
TAPBP	0.550522	1.45667e-26
IGHA1	0.550402	5.9689e-07
USP3	0.550013	8.43431e-22
TNIK	0.549663	9.6566e-25
SEPTIN9	0.548404	2.5016e-26
CD3E	0.547752	3.07659e-29
LEF1	0.545657	7.35439e-29
PMAIP1	0.538247	1.65765e-22
FYB1	0.536993	4.90542e-26
PTPRJ	0.536347	3.98999e-25
HLA-DPB1	0.532019	1.67546e-22
CLK1	0.530976	1.38269e-12
GPR174	0.529832	1.8933e-23
ARID2	0.529754	9.07514e-21
APBB1IP	0.528373	1.10656e-23
PER1	0.526385	3.86783e-21
OASL	0.526053	1.45774e-12
CD6	0.522611	5.61285e-22
RABGAP1L	0.519241	2.79658e-23
HIVEP3	0.518727	1.47125e-25
MIR155HG	0.51593	3.43843e-20
TMC8	0.511785	4.5941e-23
CKS2	0.510116	9.43024e-09
DUSP1	0.507867	1.2732e-09
GLA	0.504718	4.22525e-13
CEP85L	0.504178	1.88416e-17
TAB2	0.503059	2.26553e-23
PTGES3	0.501195	1.13227e-19
PSME1	0.501066	6.36893e-21
STAT1	0.49914	2.07051e-19
CGAS	0.498062	2.13423e-17
DDX58	0.497644	1.57873e-22
AC016831.7	0.497535	9.18401e-10
SP140	0.497477	1.38206e-17
UTRN	0.495239	5.95259e-19
PELI1	0.494716	2.25832e-28
P4HA1	0.493689	3.17991e-16
ETV6	0.489087	2.72748e-19
ABCC1	0.482411	6.19851e-18
TCP1	0.48215	1.0729e-15
TNF	0.481731	0.00952561
ZEB1	0.48083	5.33231e-11
SIPA1L1	0.480612	1.01233e-21
EIF3L	0.479515	2.08376e-19
RPL18A	0.478571	5.37413e-40
NKRF	0.477387	4.03355e-18
LIME1	0.476516	4.48744e-17
CROCC	0.476127	8.32059e-24
RPL29	0.475581	1.88254e-48
SESN3	0.475049	1.40934e-19
ICAM1	0.475008	1.465e-16
EMP3	0.474432	1.16072e-19
TIMP1	0.474172	4.99748e-12
ALDOA	0.473526	1.05077e-34
ARHGAP4	0.472375	1.78575e-19
APRT	0.471376	1.07285e-17
ZNF331	0.470442	2.69603e-11
SLC2A3	0.469093	1.09893e-14
ZNF10	0.468002	6.85112e-15
MAL	0.4664	1.0917e-18
FAM117A	0.465886	1.33605e-20
TNFSF9	0.465368	0.0344308
ANKRD44	0.464903	2.65293e-18
ACTG1	0.462854	3.73461e-31
AC079793.1	0.462733	1.90749e-38
ITGB2-AS1	0.457216	1.33563e-29
IFFO2	0.456537	8.4386e-17
CSRNP1	0.454265	2.62402e-14
C5orf56	0.454069	3.57501e-21
CHD3	0.453325	1.08022e-12
ANK3	0.453127	7.6603e-22
LYST	0.452774	3.07239e-14
KLF2	0.452437	5.06939e-10
MSN	0.451932	1.09467e-12
PSMB9	0.449806	7.40456e-18
KLRG1	0.449323	1.51399e-16
WHAMM	0.449095	2.07247e-16
PIM3	0.448825	2.61986e-17
TNFRSF14	0.44872	3.62992e-24
HNRNPU	0.448609	9.27357e-10
TRIM26	0.4484	1.52624e-20
GAPDH	0.444738	1.56344e-20
SPTBN1	0.444306	1.98004e-16
NEU1	0.442834	1.68157e-10
BABAM2	0.442376	6.76069e-20
ITGB1	0.442327	5.40491e-10
LY6E	0.441506	4.48947e-15
ACAP1	0.441456	5.71076e-13
NUDT4	0.44099	1.03744e-08
LDLR	0.440491	1.06154e-17
GZMM	0.436918	1.93472e-17
RARA	0.436787	9.05615e-18
SRPK2	0.435457	1.21355e-19
PRDM2	0.435324	1.56574e-10
LINC00861	0.435051	1.46888e-15
KDM2B	0.434801	2.18402e-16
RGCC	0.432963	2.05772e-10
PGAM1	0.430892	8.02181e-15
PCED1B	0.430021	1.89787e-19
PFN1	0.429647	5.06191e-28
RUNX1	0.428177	4.26572e-13
MCUB	0.425012	3.95618e-16
ITGA4	0.424568	4.16005e-13
ATP2C1	0.424552	1.25593e-18
LINC01934	0.424389	4.1447e-18
SEPTIN1	0.424255	2.13802e-14
TRAV8-2	0.423826	4.11213e-11
FOXN3	0.423311	7.65716e-15
BCL2	0.42225	4.07081e-11
TCAF2	0.420837	3.53249e-16
ARL6IP5	0.420425	4.69838e-14
PCED1B-AS1	0.419297	1.46673e-15
LAT	0.418123	1.4174e-12
P2RY8	0.417072	4.84531e-11
GPSM3	0.416951	7.43874e-25
IRF1	0.416615	5.15253e-09
ABHD14B	0.416335	9.29615e-16
S100A4	0.414493	1.06621e-05
ARHGEF1	0.412844	1.19958e-21
PRKACB	0.412371	1.55935e-13
SYNE1	0.41079	7.7237e-11
KDM6A	0.409893	2.19396e-17
ATM	0.40912	1.11069e-10
SMDT1	0.408366	6.20257e-26
FAM107B	0.407609	1.76743e-10
ABCG1	0.40609	1.19769e-12
HMGA1	0.405429	6.38393e-11
HMGCS1	0.405031	2.21213e-13
STARD7	0.404984	1.42818e-07
LCK	0.403805	2.97011e-13
STAT5B	0.402744	1.79534e-19
CORO1B	0.401178	2.20505e-22
IL21R	0.400962	9.63928e-15
NFATC2	0.400766	7.14761e-15
MIR222HG	0.400639	8.64462e-05
IL16	0.400328	3.7708e-16
RPL19	0.399531	1.25219e-33
ITGB2	0.39925	1.20287e-30
CPB2-AS1	0.399207	1.38313e-21
S100A10	0.399179	4.65804e-10
TLE5	0.398486	5.76556e-14
PRNP	0.398291	0.000237164
CARD11	0.395517	4.5473e-17
LPXN	0.394599	3.37801e-12
ATP11B	0.394409	1.05708e-08
S1PR1	0.393581	1.91898e-14
REX1BD	0.392633	5.1095e-14
NFKBIE	0.392615	1.0374e-19
TAF10	0.392044	1.31971e-11
HSPA4	0.388737	2.00534e-14
TMEM238	0.388151	5.44476e-13
ZFAND3	0.387927	8.64353e-15
PPP1R16B	0.387235	5.5819e-07
SCLT1	0.386782	2.47075e-10
KLF10	0.383539	8.605e-13
SMYD3	0.383185	6.98579e-18
SMAD3	0.38102	3.54236e-11
TRAF3IP3	0.380831	4.19093e-12
UCP2	0.380472	1.06947e-09
IMMP2L	0.377524	1.78213e-19
GATA3	0.376645	3.80242e-06
DIPK1A	0.375944	1.87961e-18
TBC1D4	0.375475	3.59865e-18
HUWE1	0.375404	3.34879e-09
TUBA1A	0.373866	5.67865e-05
CDR2	0.373306	2.96093e-09
KLF12	0.37317	2.36422e-13
EEF1D	0.372089	8.34456e-22
IGFLR1	0.371784	1.21909e-16
CCNY	0.37167	1.77084e-09
AHNAK	0.371195	1.55228e-18
MYADM	0.370621	0.000569762
RPS18	0.370371	3.74018e-33
DRAP1	0.368252	2.4025e-08
ZC3HAV1	0.36775	1.37837e-06
EEF2	0.367427	2.07078e-13
HLA-DRA	0.366717	1.69221e-05
C9orf16	0.366322	2.77131e-10
ZAP70	0.365963	2.63031e-21
LDLRAD4	0.365842	3.07784e-13
TBC1D10C	0.365608	1.44158e-12
PDE3B	0.363346	6.44048e-18
HIST1H2BJ	0.36228	2.15734e-13
DEF6	0.361272	2.92366e-18
HINT1	0.361223	5.82224e-16
OSBPL3	0.36119	1.2882e-11
OGDH	0.359699	4.64368e-13
TRAPPC9	0.359114	3.29852e-17
SP140L	0.357564	8.62074e-11
TSPYL4	0.357256	7.1961e-11
TUBA1C	0.356406	0.000336506
RNF168	0.356086	9.86191e-10
RPL28	0.355596	2.05272e-37
RPS10-NUDT3	0.355396	4.07674e-20
HLA-DPA1	0.355336	2.07506e-07
MORF4L2	0.354221	9.23414e-06
MOB3A	0.351884	8.49257e-22
CMTM7	0.350307	9.79648e-11
PIK3CD	0.349965	1.72049e-13
DOCK10	0.3492	8.83611e-08
CD4	0.349193	2.44586e-15
SCML4	0.349143	5.96492e-13
UBAC2	0.34857	8.91974e-10
PSME2	0.346685	4.44235e-08
CFL2	0.346671	4.26108e-10
GPHN	0.346488	4.49552e-16
ICAM3	0.346057	1.02114e-07
GZMA	0.345983	2.77534e-11
FBXL14	0.3455	1.12683e-22
RPS4Y1	0.345496	1.39509e-21
SPATS2L	0.345424	0.000175534
AKT3	0.345109	5.45505e-09
RPL10	0.344885	4.00383e-23
CCDC88C	0.344589	1.46763e-08
TECR	0.343941	2.54614e-13
PHACTR2	0.343105	3.20932e-11
HIVEP2	0.342931	1.57395e-05
PSME4	0.34182	4.10721e-08
MHENCR	0.341531	2.09377e-12
CALM3	0.341289	2.3e-08
MXD1	0.340572	2.16667e-08
PACS1	0.340241	3.3254e-10
CIB1	0.339511	3.61329e-11
PPP1CC	0.339208	1.3644e-07
RASGEF1B	0.339184	1.23195e-08
EML4	0.338693	3.18915e-11
HIST1H2BD	0.338086	4.8569e-09
EIF5A	0.337772	3.18274e-07
ZSWIM6	0.336818	3.04378e-09
KIF2A	0.336608	8.05092e-07
TRBC2	0.335605	0.00100776
RPS12	0.335313	4.26666e-25
CUTA	0.335191	4.0696e-08
B4GALT1	0.334591	3.16604e-10
MBP	0.333142	6.57563e-09
STIP1	0.332818	1.11175e-28
PRKCB	0.332057	3.02468e-14
CYTH1	0.331823	1.52735e-07
RPS4X	0.330845	1.00793e-25
TUBB	0.329683	2.04622e-06
CCDC85B	0.32883	4.10207e-07
C17orf49	0.328826	1.53725e-08
SSBP2	0.328566	5.13024e-11
RPS9	0.327769	5.26197e-18
RPS5	0.327059	1.1279e-13
HLA-DQA1	0.326911	2.35404e-10
ELMO1	0.326772	2.17457e-13
WEE1	0.326259	1.89852e-06
RGS10	0.326177	2.25412e-11
PAG1	0.32613	1.17389e-08
GRK6	0.326061	1.32363e-09
PPDPF	0.325888	3.4321e-10
SERPINB9	0.325606	2.41154e-06
NBDY	0.324805	1.02948e-09
HIBCH	0.324512	6.70725e-11
ZNRD2	0.323009	6.47444e-09
PBXIP1	0.322403	1.07699e-10
NSD3	0.321579	2.24427e-07
AHR	0.321535	0.000254664
DYNC1H1	0.321063	8.20042e-07
MPP7	0.320461	1.22257e-13
RPL8	0.319684	1.94363e-15
FLNA	0.319452	2.29085e-06
POU2F1	0.319423	2.92343e-08
NFATC3	0.318571	1.39335e-07
RAB30	0.318464	1.96774e-12
NME2	0.318207	2.1044e-07
TRABD2A	0.318085	6.2079e-07
CD3D	0.317819	1.00816e-07
TTC33	0.317166	1.12529e-08
CPSF6	0.317143	5.94113e-10
MBNL2	0.316373	3.34945e-05
CRTC3	0.315213	8.08181e-08
LSM2	0.315047	4.47634e-08
RPS14	0.313921	1.09205e-16
EXOC4	0.31301	3.93587e-12
ARHGAP26	0.312688	9.12846e-05
RELB	0.312635	9.37143e-06
RASAL3	0.311958	6.75367e-07
IL27RA	0.311403	4.13912e-09
HIST1H2BC	0.311378	3.12357e-05
MAML2	0.311018	2.04982e-10
SYTL1	0.310493	3.7936e-08
INSIG1	0.310177	0.0162745
ATP5F1B	0.309117	1.22158e-05
LPP	0.308978	2.79182e-09
LAMTOR4	0.308351	9.55621e-12
TTC39C	0.308175	5.23612e-07
HELB	0.307739	0.000737867
RIPOR2	0.307069	2.13211e-11
KHDRBS1	0.306852	1.45281e-06
ITPKB	0.305836	1.39967e-09
TRAF5	0.303988	1.69737e-08
NFKBIZ	0.303473	6.87668e-11
AC092821.3	0.30214	1.21651e-07
VIM	0.301852	0.00032811
DHRS3	0.299935	2.61985e-06
SF3A1	0.299753	1.01277e-05
ZYX	0.299731	3.13136e-15
USP47	0.299307	2.60221e-05
BICRAL	0.298968	8.48715e-11
SREBF2	0.298618	1.91039e-07
TSPAN5	0.298578	1.54019e-10
IL23A	0.298466	4.4604e-08
SLC25A25	0.297964	8.06575e-12
ITGB7	0.297446	6.91168e-13
RABGEF1	0.297165	1.76559e-10
GRAP2	0.296775	4.56188e-09
RACK1	0.296662	1.49917e-11
PARVG	0.295383	3.79401e-10
NFATC1	0.294926	7.39145e-06
YES1	0.294765	6.22762e-12
GTPBP1	0.294562	8.75319e-05
JUNB	0.294393	9.12199e-15
PRKX	0.294329	8.77937e-08
ZBTB11	0.294199	0.00459442
HIST1H3H	0.292741	2.35895e-08
NEK7	0.291078	0.000731755
JAK3	0.290835	4.14461e-13
RFTN1	0.290719	1.33284e-13
BLOC1S1	0.290644	2.28445e-16
TC2N	0.290142	0.000279629
GMFG	0.289476	3.83174e-09
HIST1H2AE	0.289437	4.20793e-08
PDE8A	0.289312	1.05665e-08
FBXO11	0.289283	0.000142229
PDCD4	0.289259	8.42088e-06
NDUFV2-AS1	0.289014	6.57513e-09
SH3BGRL	0.288882	3.76464e-05
CD37	0.2887	1.10971e-06
RALA	0.287709	4.21101e-05
CCDC18-AS1	0.287488	2.71807e-05
RBL2	0.286784	1.49219e-05
TRAF3	0.286201	3.56774e-06
GRASP	0.285991	1.82513e-09
RPL4	0.28557	1.29513e-09
AL035530.2	0.285302	2.25633e-06
EEF1G	0.284976	5.76232e-08
KPNA2	0.283897	0.00511253
FAM13A	0.283836	2.08981e-07
RAB11FIP1	0.283543	0.0289085
FAM118A	0.283234	6.66337e-07
PDE7A	0.28077	1.25647e-05
MAP3K5	0.280694	3.86684e-05
NACA	0.279609	4.21289e-11
ATP5F1D	0.27865	2.55931e-08
THEMIS	0.278391	9.6698e-07
XAF1	0.277444	3.2285e-07
POLD4	0.276984	1.90266e-08
NUCB1	0.276322	7.76386e-08
RPL3	0.276257	5.1108e-12
SELENOW	0.276204	0.0128847
PHF19	0.275758	1.01989e-05
TSTD1	0.2749	2.8347e-06
ITGAL	0.274569	1.82631e-12
CD82	0.274093	1.66357e-10
ARL4D	0.273617	0.000559316
TMBIM1	0.273488	0.000154489
DNAJC1	0.273083	0.000413035
RHOF	0.272765	4.65584e-07
HLA-E	0.272471	3.72413e-09
ECE1	0.272083	1.20646e-10
CAPN2	0.271944	1.90023e-05
DENND1C	0.271903	1.73192e-13
RASGRP1	0.270936	1.31617e-08
ADGRE5	0.270712	0.0124347
HIST2H2BF	0.270449	1.44073e-06
LRBA	0.270163	4.85478e-09
CD27	0.269823	4.3532e-09
NOSIP	0.269612	0.0221691
SH3KBP1	0.268231	2.44523e-05
DYRK1A	0.268146	0.0113553
RPS8	0.268055	4.91307e-21
PSMB10	0.267643	2.32805e-07
UAP1	0.267163	0.0232435
EZH2	0.26699	0.00944052
SNRK	0.266882	0.00011948
ZHX2	0.266272	0.000977933
ATP5PO	0.26577	0.00491226
EPB41	0.265339	0.00725075
MATK	0.263445	0.000408627
JARID2	0.262922	0.000181547
FCMR	0.262874	0.0160324
PPP3CC	0.262628	6.59526e-07
KDM2A	0.262068	0.00333551
RHBDD2	0.261535	5.81705e-06
COX4I1	0.261035	1.91118e-05
B2M	0.260896	1.43231e-11
NDUFV2	0.260744	3.17659e-09
TOR1AIP1	0.260273	3.20207e-05
RALGAPA1	0.260009	0.00661424
DOCK8	0.259401	2.01234e-07
CLIC1	0.259082	1.3885e-08
TMC6	0.258556	8.51703e-08
RPL13	0.256795	1.74717e-20
H3F3B	0.255717	0.0249765
ARID1B	0.255635	0.00027563
DNAJC15	0.255582	0.00107216
OPTN	0.25476	0.000322798
FIS1	0.254401	4.92005e-05
DPYD	0.252751	3.47102e-11
KDM4C	0.251951	3.80362e-10
MBNL1	0.251836	4.94773e-07
USP9X	0.251815	0.00897114
EEF1B2	0.251658	1.14621e-06
BCL3	0.251653	1.51723e-06
AC068587.4	0.251624	6.76986e-09
CASK	0.251337	0.0383386
DOCK9	0.250629	8.14563e-08
XPR1	0.250622	1.24838e-05
ABI1	0.250562	2.61295e-06
PTPN6	0.250501	4.95963e-11
REV3L	0.250488	1.16289e-05
APOBEC3G	0.249325	0.000466769
RIPK1	0.248809	2.09805e-08
TSEN34	0.24873	4.33491e-05
RBCK1	0.248455	7.58272e-06
IGBP1	0.248432	0.000894711
EPG5	0.248045	7.57523e-05
SUN2	0.247754	3.06433e-06
RASSF5	0.247243	1.0222e-06
DUSP10	0.247204	4.62696e-05
PITPNC1	0.247039	0.000202875
MZT2B	0.24669	0.0040329
C9orf72	0.246516	0.000108969
CYFIP2	0.246488	0.000228542
RPLP0	0.246487	2.30162e-07
ATP2B1	0.246357	8.19559e-07
CD28	0.246068	0.0411735
NAA38	0.245594	0.000444392
AHSA1	0.244416	1.68193e-09
HIF1A	0.244207	2.54683e-12
RPS3A	0.244145	5.08951e-12
EPS15	0.243638	0.0202271
FOXP1	0.24309	0.000136007
TAF4B	0.242862	0.00419644
RASA1	0.242747	2.36713e-05
KLHL6	0.242705	3.6064e-07
CTSA	0.242478	3.92658e-06
MLLT3	0.241754	3.54485e-05
CSK	0.241514	1.5679e-05
PAXX	0.241355	0.00137785
EIF2AK3	0.240054	2.95473e-05
PPP2CA	0.240019	0.0462601
ADK	0.239939	4.94843e-10
ECD	0.239685	6.42057e-08
BTN3A2	0.239291	0.00252334
EEF1A1	0.238649	4.74575e-08
B3GNT2	0.238576	0.0251111
2024-03-03	0.238563	0.000939975
OCIAD2	0.238506	1.88617e-05
MKLN1	0.238341	0.000112028
NUDC	0.238228	0.000828499
RANBP9	0.238031	0.00168363
NUCB2	0.237921	0.0382628
SIGIRR	0.237195	4.0409e-05
OXA1L	0.236424	0.00165196
UBE2S	0.236387	6.68259e-06
RPL11	0.235957	3.62468e-17
NOTCH2NLC	0.235871	7.25254e-12
FBXO34	0.235411	0.00253739
ARID4B	0.234787	0.000234426
GBP4	0.234008	3.77238e-07
RPL7A	0.233924	2.6671e-09
HIVEP1	0.23385	1.09849e-07
NFKBIA	0.233643	8.87629e-12
TESPA1	0.233548	2.91444e-13
RHOH	0.233445	0.00186775
GBP1	0.233419	9.22007e-05
FAAP20	0.232884	0.00178657
NUP210	0.232341	8.02552e-10
SUPT3H	0.23228	6.47731e-11
GMDS	0.232166	9.80251e-09
RPS7	0.232162	8.82168e-11
IRF2BP2	0.231256	0.0318611
COTL1	0.231185	2.45648e-07
PLEC	0.230697	4.2109e-10
GLIPR2	0.230601	0.00084315
IDH2	0.22989	2.09949e-08
YPEL5	0.2298	0.0099648
TBC1D5	0.229484	0.00198087
ARHGEF2	0.229466	0.000155944
TMEM219	0.229224	0.0259769
PVT1	0.228307	1.16093e-06
GZMK	0.226996	3.13786e-05
CARD16	0.226895	4.18375e-09
SP110	0.226387	2.90583e-05
RFFL	0.225534	7.50007e-06
NDUFV1	0.2234	3.85034e-09
MRTFA	0.223246	9.16019e-13
LTBP3	0.222557	0.00150132
SIAH2	0.222112	0.0121901
CAMK1D	0.22058	0.000113422
VCP	0.220208	3.59472e-05
CAPG	0.220153	0.000327714
LYSMD2	0.21974	0.00798679
PPP3R1	0.219668	0.00801341
MICOS10	0.218991	1.78397e-05
TRERF1	0.218272	2.02485e-07
FDFT1	0.218249	2.78212e-07
ARHGDIB	0.217772	1.53001e-05
ATP5PD	0.216569	0.0271492
MAP3K8	0.21633	0.00466794
PDK3	0.215198	3.43192e-05
ASMTL	0.215194	0.00527477
TGFBR2	0.215113	0.00387488
SMURF2	0.214864	0.0135559
LINC01138	0.214174	6.63851e-10
BST2	0.213416	2.11449e-08
GPBP1	0.212934	0.00189354
PFDN5	0.212815	0.000243724
C12orf57	0.212435	0.000409978
SERTAD2	0.211841	0.000118652
MANBA	0.2118	1.5539e-05
IFNAR2	0.210563	8.00799e-07
HSD17B7	0.210395	0.00129283
COG5	0.209751	0.000195603
CD40LG	0.209481	0.000249502
PRR7	0.209379	8.15699e-05
HIST1H1C	0.209163	4.15572e-05
ATP8A1	0.207289	0.00337264
NLRC5	0.20714	9.88003e-07
CLNS1A	0.207092	0.00499358
TRADD	0.206787	0.000177346
CTSB	0.206419	0.00714687
RPL12	0.206354	9.93449e-11
SPPL3	0.205689	0.00281377
TNFRSF25	0.205477	0.00220303
GNB2	0.204714	0.00333291
HLA-B	0.203479	2.13783e-12
HCP5	0.203456	2.49838e-05
S1PR4	0.203243	0.0473051
ARHGAP25	0.203222	1.12782e-09
LINC01578	0.203078	0.00135047
AC008105.3	0.203058	6.45589e-09
CENPC	0.202747	0.00896032
ARRDC2	0.202497	0.00143658
MIR4435-2HG	0.199598	6.36474e-07
RPL6	0.198267	1.47958e-14
TBC1D22A	0.196352	6.81011e-06
STIM1	0.196167	3.66768e-07
CD247	0.19604	0.024381
ZNFX1	0.195308	0.00948739
RAPGEF1	0.195071	2.31547e-05
CD3G	0.1949	0.00165481
NDUFS7	0.194847	0.00347679
BBC3	0.194649	0.00181826
TMEM156	0.194478	0.000565145
TNIP1	0.193915	1.00691e-06
CD44	0.193539	6.41544e-05
BIN1	0.193515	0.00204926
VOPP1	0.19338	0.000819177
VSIR	0.193035	8.60112e-06
SELENOI	0.193009	3.67152e-05
GPR132	0.192192	0.0297331
PDE4DIP	0.192088	6.75611e-06
TPST2	0.19073	0.00454291
RPL18	0.190049	6.07331e-05
SHISA5	0.187816	0.00182407
FMNL1	0.186984	0.000154261
TRAPPC1	0.186829	0.0057113
RNF167	0.186199	0.00379755
ILK	0.185962	0.0180619
TNFSF12	0.185686	0.0129268
FNDC3B	0.185265	1.48263e-05
TCF12	0.184854	0.00248148
HIKESHI	0.18391	0.00331278
DCTN3	0.183001	0.00641293
GLS	0.182312	6.46709e-06
CUL1	0.182184	0.000200486
COA1	0.18211	0.000233322
RPLP1	0.182012	0.0040379
CLASP2	0.18144	6.0889e-05
PRKD2	0.181083	1.07563e-05
CLASP1	0.18107	7.82817e-05
SAMD3	0.181028	0.00175192
MFSD11	0.179917	0.0378007
MAP7D1	0.179798	0.0024038
SPEN	0.179397	9.11311e-05
YWHAG	0.178985	0.000835639
SLC25A33	0.178408	0.0488699
ESYT2	0.178045	0.00257386
SERINC5	0.178017	0.0179592
C1orf162	0.176875	2.74296e-06
GLCCI1	0.176712	5.66671e-05
TP53BP1	0.175533	0.0121677
CAPZB	0.175325	0.000125697
ZBTB10	0.174377	0.0189712
RHOG	0.171974	0.0101307
PIK3CA	0.171671	0.00116755
SF3A2	0.171294	0.00116192
ARPC1B	0.170643	0.0491212
MDH2	0.169707	0.000924271
COMMD6	0.168507	0.0454439
ZCCHC7	0.167933	0.0448056
ETHE1	0.167852	8.11842e-08
RPL14	0.165305	5.16788e-05
INTS6L	0.164669	0.000220619
MGAT5	0.164027	0.00980144
TTC7A	0.162741	0.000109234
PRKCQ	0.162573	0.00931511
LPCAT3	0.159195	2.84246e-06
NINJ1	0.158891	6.46338e-10
PKM	0.157713	0.0158937
MRPL54	0.156611	2.37811e-08
GPN1	0.156457	0.00482392
ELL	0.155005	0.0121158
TTC19	0.15465	0.000985864
USP15	0.154554	0.000293902
RPS15	0.153938	4.86892e-10
SSBP4	0.152271	0.0215672
DENND2D	0.151807	1.89599e-09
FGD3	0.149638	0.0224657
RAB11B	0.149449	0.0157173
SEL1L3	0.148638	4.38758e-05
CA5B	0.147743	2.32778e-06
KDM6B	0.146976	1.39661e-06
MAP4K1	0.145686	0.0258253
SH2D2A	0.145188	0.0065289
PLCG1	0.144158	5.70029e-05
GSK3B	0.143987	2.48524e-06
CNST	0.142972	0.0188449
DUSP2	0.141231	4.78603e-12
MAP4K4	0.141073	4.64694e-08
UBE2L6	0.140699	0.00956753
PHYKPL	0.140368	0.0017969
RAB3GAP1	0.13725	0.000682581
TBL1X	0.136222	0.0436976
CLEC2D	0.136008	0.000171967
RPS23	0.134083	3.70054e-07
RPS3	0.133574	6.80332e-05
CSNK2B	0.126557	0.00746236
ZNF106	0.124952	0.000644867
EFHD2	0.124692	0.000109367
RPL5	0.124389	0.000399074
TAP2	0.123347	0.00596568
PIK3R5	0.123317	0.00573944
CDK17	0.122139	0.00972355
VEGFB	0.121186	0.0221576
RNF166	0.120807	8.77955e-06
CMTM8	0.120506	0.0245992
IL2RG	0.119731	6.09382e-05
R3HDM4	0.118878	0.000220271
PHB2	0.118779	0.0254341
RBBP6	0.11858	0.0244647
KCNA3	0.115977	2.77273e-12
NCOR2	0.115823	2.88369e-06
VPS13B	0.112568	0.00596043
GPRIN3	0.111378	0.00877643
GIT2	0.11131	1.99217e-05
HPCAL1	0.111167	7.52663e-06
SPOCK2	0.106536	0.0138945
EHD4	0.102671	0.000122322
TOM1	0.100162	1.30697e-11
LCP1	-0.100567	7.15498e-07
CD7	-0.104923	0.0248625
PPP1R18	-0.10863	0.00960033
RPS2	-0.114018	2.15919e-13
RPS27A	-0.12598	2.48511e-08
ATF3	-0.130463	0.0159531
IGF2R	-0.146622	1.39684e-07
SNX3	-0.148123	0.0260045
ACADVL	-0.16336	0.0178771
RPL36	-0.164173	2.67639e-16
CTSD	-0.165445	5.15713e-16
NCL	-0.165635	0.0312709
CALM1	-0.167325	6.8494e-06
PNRC1	-0.1699	0.00416279
LENG8	-0.171232	0.00138727
AKIRIN2	-0.175323	0.0434073
RPS19	-0.184909	4.73922e-14
PIK3R1	-0.185988	2.10821e-06
CNBP	-0.188139	0.0376038
ID1	-0.191115	0.0348471
KMT2E	-0.193265	0.00384714
RPL34	-0.196497	5.27914e-17
RPL17	-0.198022	2.50636e-10
PGK1	-0.19993	0.00010901
FYN	-0.200882	0.0204201
MLEC	-0.202381	0.0182022
RPL22	-0.206285	3.07985e-07
MRPL47	-0.208151	0.00736922
RPL35A	-0.208905	5.52371e-16
TGFB1	-0.211817	0.00108734
RPS26	-0.212105	0.00241009
OST4	-0.213626	0.00232876
RPL15	-0.213949	4.13974e-13
SND1	-0.214557	0.00364614
AC136475.3	-0.215167	5.04571e-09
SUDS3	-0.215461	0.0325648
PSMD11	-0.217207	0.042017
RRP7A	-0.21783	0.0229663
STK17B	-0.218529	0.00197022
SNHG29	-0.222801	0.000461576
UBR4	-0.224022	0.000828329
LEPROTL1	-0.228196	0.000409904
SNRPD3	-0.228257	0.0336279
ADRB2	-0.228467	0.0478744
GIMAP5	-0.228503	0.000748586
EIF4A2	-0.228571	1.28081e-06
JAK1	-0.230191	6.77371e-05
MYL6	-0.230446	2.03686e-06
RAB10	-0.230649	0.021406
PAK2	-0.231709	0.0111094
SRSF2	-0.235893	0.00231741
COX7C	-0.236894	9.43644e-08
CD2	-0.237442	1.99791e-05
BOLA2	-0.239571	9.59328e-05
UBE2B	-0.240587	0.000728359
ANKRD11	-0.240763	6.53116e-07
ERVK3-1	-0.240843	0.00603778
MOB2	-0.241498	2.10084e-07
TAX1BP1	-0.241886	0.00761764
CAPZA1	-0.242217	0.0287276
BZW1	-0.243589	0.0143149
SLC3A2	-0.244015	0.0235054
MPLKIP	-0.244382	0.00424119
YTHDC1	-0.244393	0.0386005
NPM1	-0.244913	1.85123e-11
DERL2	-0.245793	0.000187949
ZBTB21	-0.249656	0.00155947
CCDC6	-0.250942	0.0287655
AL627171.1	-0.251705	0.000244861
HNRNPA1	-0.252547	1.75055e-10
GLIPR1	-0.253245	0.0294406
PSMA4	-0.253272	0.0219642
CRELD2	-0.254474	0.00129833
DBI	-0.255179	0.0200044
BRD2	-0.255825	0.00116941
UBE2L3	-0.256923	0.0056683
TARS	-0.258115	0.00372626
PCNP	-0.258529	0.00261012
HIST1H1E	-0.259005	5.46631e-15
HMGN1	-0.259288	0.00375855
RPL27	-0.26042	2.8577e-25
SP100	-0.2605	0.0128897
PTPN1	-0.26051	0.000314193
CALR	-0.261269	0.000939675
VPS35	-0.26198	0.00822211
SLAMF6	-0.262314	0.0292447
TMEM123	-0.262875	3.41269e-05
PNPLA8	-0.262924	0.000294405
PRXL2C	-0.263037	0.0251911
KIF20B	-0.264306	0.0110616
TALDO1	-0.26544	1.05412e-05
RPS24	-0.265931	6.02728e-28
PCF11	-0.266509	0.0381675
SLC9A3R1	-0.267325	0.0212449
RUNX3	-0.269313	0.00589283
KIAA0355	-0.269873	0.000606924
YPEL3	-0.270086	0.0203403
FUBP1	-0.270141	0.0179549
TOMM7	-0.271121	3.71361e-11
ZNF394	-0.271209	0.0218989
APLP2	-0.271283	0.00504849
DCTN6	-0.271367	2.45346e-05
REXO2	-0.272495	0.000370362
MXRA7	-0.272526	0.00133023
POLE3	-0.272966	0.0118561
CDC42	-0.273584	0.000162367
SUGT1	-0.2738	0.00686636
CFLAR	-0.274039	0.0148275
RPS21	-0.274754	1.41068e-27
SVIP	-0.275809	0.00437848
SELENOF	-0.276069	0.0154724
MYDGF	-0.276664	0.00556763
SLC25A37	-0.277911	0.00967483
CSNK1A1	-0.277973	0.00847134
VPS4B	-0.278775	0.000227452
OSTF1	-0.279372	7.06918e-05
SUZ12	-0.279716	0.00785568
CTDP1	-0.279922	9.85809e-05
AC007384.1	-0.280314	0.00665256
IK	-0.281088	0.037358
SNHG16	-0.281377	0.0157531
RB1CC1	-0.282135	0.0428946
POMP	-0.283688	0.000837724
TMED7	-0.284833	0.000933781
CDC26	-0.285028	0.0023824
ARGLU1	-0.285042	0.000155537
CSNK1E	-0.285989	0.000576557
AKIRIN1	-0.28668	0.0132909
SH2D1A	-0.286716	0.0318311
PTMA	-0.2868	1.16268e-22
SYF2	-0.287088	0.0115259
SUPT4H1	-0.287237	0.0122282
CYBA	-0.287349	0.000461028
SIVA1	-0.28738	0.00141692
OSBPL8	-0.288866	0.00226449
RBMX	-0.289107	1.64141e-05
ARCN1	-0.29064	0.000844655
DDX27	-0.290752	0.00145237
ITGAE	-0.290773	0.000744142
BAX	-0.291027	0.019583
MPHOSPH10	-0.291503	1.37652e-07
SNRPE	-0.291714	6.59826e-06
RBM17	-0.292194	0.00169085
CHPT1	-0.293523	4.80768e-06
DIP2A	-0.293965	0.02209
SLC16A3	-0.294018	0.00202288
PSMB3	-0.294152	0.00231349
LRPAP1	-0.295685	0.00130669
RPL7L1	-0.299212	0.000115112
CDV3	-0.299736	0.000475223
AC008875.3	-0.300152	0.00468098
TUBB4B	-0.300487	0.000271291
UQCRB	-0.301887	3.23941e-11
APOL6	-0.302576	0.0215484
CCSER2	-0.302786	0.00208453
SRRM2	-0.302833	2.0278e-12
DUSP16	-0.302852	0.0076917
RPS16	-0.303578	1.23705e-22
GCA	-0.303791	0.00615338
ELK3	-0.305709	0.000805554
NOP10	-0.305875	2.27181e-07
TRAPPC2B	-0.305933	2.07549e-06
SRSF5	-0.306529	0.000116088
TMEM38B	-0.306705	1.20203e-06
SCAF11	-0.306944	0.0171927
CDKN2AIP	-0.307058	0.00451061
SRRM1	-0.307887	7.37001e-11
SLC38A1	-0.308876	1.23395e-06
RSRC2	-0.310363	4.73637e-07
ARHGDIA	-0.310488	0.00188571
GAS5	-0.311285	1.00304e-20
B4GALT5	-0.311369	0.000998071
UBL5	-0.3133	0.000121002
DDX3X	-0.313393	2.25746e-05
NDUFA5	-0.31354	5.85061e-06
SEC11C	-0.313874	0.000255989
FURIN	-0.313911	8.74944e-06
ARL8B	-0.314414	0.00304246
CD99	-0.314922	5.02448e-05
UBE2D3	-0.315092	2.17027e-12
XRN2	-0.315642	0.000210277
SNHG32	-0.316022	0.00143738
RPLP2	-0.317042	2.43596e-29
IVNS1ABP	-0.317384	0.00677112
SNU13	-0.318083	8.14022e-07
RAB5C	-0.318161	0.000231522
HNRNPH3	-0.318559	0.000132324
RBM25	-0.319137	1.1786e-07
EIF4G1	-0.319622	0.000486564
SAR1A	-0.319754	5.13672e-05
GSPT1	-0.320775	0.000338682
COX7B	-0.321449	9.64077e-05
ARHGEF7	-0.321471	0.00228162
RABGGTB	-0.321659	5.17157e-05
RBM38	-0.321804	0.00148288
AC023157.3	-0.323119	0.000296456
P4HB	-0.323793	0.000121899
ARPC5L	-0.325204	0.000280131
SNHG8	-0.32587	9.08631e-08
PAPOLA	-0.326599	1.87655e-06
PCBP2	-0.327006	1.7656e-05
GLUL	-0.327035	0.00065847
MAGOH	-0.327981	5.76123e-05
PLEKHG2	-0.330342	0.0125479
PTK2B	-0.330812	1.56728e-05
SMC3	-0.331198	5.06011e-05
MDM4	-0.331222	7.97658e-05
RAB5A	-0.33288	0.00061969
EIF1AX	-0.3344	1.53414e-06
ELL2	-0.335491	1.05981e-05
SNRPB	-0.335551	4.63203e-07
COX14	-0.335783	3.61462e-05
CCNH	-0.335999	5.08282e-07
SRSF6	-0.336193	0.000381964
IFI30	-0.336685	2.96889e-07
TMEM59	-0.33763	9.77449e-07
TMSB10	-0.338906	1.77128e-14
RPL36A	-0.339016	1.14619e-24
LITAF	-0.339041	4.11883e-10
HNRNPAB	-0.340698	4.33315e-05
RAC1	-0.340956	0.000132515
RUNX2	-0.341674	0.00307878
TMEM173	-0.342179	0.00014327
RBM39	-0.343298	3.17652e-16
SRP19	-0.343342	1.93513e-06
DDX24	-0.34378	2.30896e-13
SNHG1	-0.343971	2.1675e-05
SNHG3	-0.344811	3.34289e-08
POLR2K	-0.34548	7.04177e-06
SNRPB2	-0.345617	2.239e-06
LINC00239	-0.34651	8.17632e-11
SAMSN1	-0.347132	9.74743e-09
SH3GLB1	-0.347275	9.71218e-05
GNA13	-0.347304	1.2957e-05
HMGB1	-0.347372	1.96976e-15
PNN	-0.347712	1.74617e-07
ARFGAP3	-0.349381	6.1494e-06
C6orf62	-0.350277	8.32538e-08
DYNC1LI1	-0.350986	1.1664e-07
SPON2	-0.351074	1.06422e-06
KCNQ1OT1	-0.351284	5.41146e-05
DDX39B	-0.351992	2.61894e-05
SLC1A5	-0.352019	1.60704e-05
SPCS3	-0.35202	3.32319e-05
ATP6V0E1	-0.35208	2.87823e-06
HERC5	-0.353925	2.31162e-05
CXCR6	-0.354462	4.1074e-05
TRIM22	-0.355472	8.06931e-05
DYNLRB1	-0.356461	3.53666e-08
PET100	-0.356503	3.01882e-06
RNF19A	-0.356704	1.45173e-07
RASD1	-0.357773	0.00242459
SAMHD1	-0.359202	4.05235e-05
PCMT1	-0.360446	2.24498e-08
BMI1	-0.360452	1.16927e-07
RPL22L1	-0.360924	2.13897e-05
WDR74	-0.362066	4.63169e-07
C11orf58	-0.36376	2.97957e-08
OAZ1	-0.364355	7.49582e-08
MRFAP1	-0.364392	1.31065e-08
TMED2	-0.364802	3.30649e-08
SELENOK	-0.365719	4.55901e-08
SDF2L1	-0.365995	1.88641e-08
BCL2L11	-0.36697	1.86198e-05
SKP1	-0.369047	6.79921e-13
RNMT	-0.369501	5.22929e-06
SAP18	-0.370674	2.67668e-08
IQGAP1	-0.370949	6.00367e-08
DUSP6	-0.371515	1.6053e-06
PTTG1IP	-0.371871	3.00504e-05
RPL37	-0.37213	5.23119e-37
AC245297.3	-0.372432	3.671e-06
EIF2S2	-0.372917	1.11099e-07
LDHA	-0.374708	1.16303e-07
AL627171.2	-0.376902	1.17002e-11
DNAJC8	-0.377883	9.1223e-07
BRD1	-0.378982	7.77716e-09
MTDH	-0.379277	8.51829e-08
ZRANB2	-0.38123	9.81203e-06
LGALS8	-0.381552	4.73458e-09
CCDC59	-0.381795	1.83224e-06
ARF1	-0.382208	3.54238e-09
RPL36AL	-0.38223	1.61244e-25
RILPL2	-0.382345	8.44075e-09
MALT1	-0.382428	5.06477e-07
MAFG	-0.382593	2.80435e-10
YBX1	-0.383521	5.42518e-17
OGT	-0.384221	2.68348e-05
CIR1	-0.384837	5.95672e-08
SNHG9	-0.386028	2.76197e-06
GABPB1-AS1	-0.386086	4.54585e-08
SATB1	-0.387927	1.28527e-08
KDELR2	-0.389355	3.53434e-10
THAP5	-0.390912	1.59505e-17
PRRC2C	-0.391242	3.16324e-21
CST7	-0.394073	0.000100529
VMP1	-0.394515	6.68653e-11
AL121944.1	-0.39567	1.03237e-10
LMO4	-0.398101	1.73513e-08
VPS26A	-0.398329	9.79929e-11
RPS11	-0.399172	2.02348e-50
BATF	-0.399438	1.167e-09
HIPK1	-0.3997	7.36481e-11
TPT1	-0.399996	8.13171e-40
PDE4D	-0.401347	1.63989e-07
EIF5B	-0.402551	5.38636e-08
ZFAND5	-0.403832	7.24153e-06
MORF4L1	-0.405741	2.9635e-14
SMCHD1	-0.405967	2.22343e-15
HNRNPA3	-0.406113	9.63625e-13
CEBPD	-0.406951	1.15868e-05
HNRNPDL	-0.409128	3.2507e-26
DDIT4	-0.409944	3.30073e-20
LUZP1	-0.410349	3.99552e-10
PARP8	-0.411949	2.0457e-10
PTMS	-0.414553	8.1149e-15
LRRC75A	-0.415477	4.89789e-25
RPL39	-0.415586	3.36196e-38
FLOT1	-0.416663	1.90856e-07
TM9SF3	-0.417448	4.65084e-11
ARPP19	-0.418157	2.64463e-13
CEBPZ	-0.418246	2.38567e-09
KLF13	-0.418714	1.97668e-09
PPIB	-0.419012	1.21493e-14
SEC61B	-0.420369	4.91452e-11
ATP5F1E	-0.422295	3.17145e-23
DDX5	-0.422671	6.7315e-23
CYCS	-0.423855	4.66612e-09
MYBL1	-0.425715	1.3494e-05
ELF1	-0.42605	1.65397e-19
AL499604.1	-0.426147	7.80413e-09
RAB5IF	-0.427657	6.0606e-09
SNRPG	-0.429399	2.41725e-11
TXN	-0.431545	4.43211e-06
PLIN2	-0.43276	0.0234543
OFD1	-0.433172	2.32603e-08
ZFP36	-0.434795	8.88209e-21
HM13	-0.435327	5.62183e-10
N4BP2L2	-0.435698	4.49059e-12
AC087239.1	-0.436545	8.03571e-09
FOSL2	-0.437817	1.75508e-10
TGIF1	-0.437868	3.79515e-10
AMD1	-0.438143	1.25342e-08
CYTIP	-0.439489	1.38033e-28
TBC1D15	-0.439757	6.13678e-14
HNRNPD	-0.440364	3.52491e-14
RPS27	-0.440404	1.40628e-61
SNHG7	-0.441013	2.26818e-12
PIK3IP1	-0.441016	1.54036e-12
ARF6	-0.441593	2.56238e-16
RPL31	-0.443277	9.22493e-47
SET	-0.447868	5.48347e-18
PAIP2	-0.448857	4.9029e-14
SKIL	-0.450554	1.68805e-10
PPIG	-0.450965	3.55466e-12
TOMM5	-0.454119	8.19324e-13
IL6ST	-0.454528	1.08237e-13
BRD9	-0.454946	1.54231e-12
EIF1	-0.455087	6.02264e-47
DNAJC3	-0.455839	5.37894e-09
ANP32A	-0.457546	0.00238176
IL18R1	-0.458116	1.33314e-11
MALAT1	-0.459517	1.99305e-28
CD226	-0.46201	4.53276e-11
PA2G4	-0.462381	1.69639e-14
CCNL1	-0.463676	6.30841e-25
AC020916.1	-0.464084	2.3663e-10
SUB1	-0.4649	1.86732e-21
SNHG5	-0.465195	4.05669e-17
TMEM70	-0.468288	7.22629e-13
RNF125	-0.468366	4.70191e-13
GCC2	-0.469804	1.17455e-13
ETS1	-0.471133	1.25505e-22
SPRY1	-0.47193	1.98537e-09
PTPRC	-0.472361	2.68735e-37
ATP1B3	-0.472812	4.41814e-08
C1orf56	-0.474181	2.04062e-15
GABPB1-IT1	-0.474542	5.79224e-14
FOSB	-0.474657	5.29123e-11
MT-CO1	-0.476405	5.40496e-39
MCAM	-0.477119	2.74703e-12
NIBAN1	-0.47732	1.63347e-11
GOLGB1	-0.478443	5.91478e-12
HEXIM1	-0.478791	4.15722e-13
GLO1	-0.482488	2.89791e-19
POLR2L	-0.484045	1.91517e-15
PHTF1	-0.484645	1.44437e-11
CREBRF	-0.485571	8.72726e-14
TMBIM6	-0.48777	1.14043e-20
RPS27L	-0.488334	1.5854e-12
PCNX1	-0.488482	1.80684e-16
CREM	-0.490001	7.03864e-18
ARF4	-0.491357	3.2179e-14
PFDN2	-0.49216	4.12506e-18
VAPA	-0.493759	7.45619e-16
PPP1R10	-0.494302	1.65921e-16
HMGB2	-0.494851	5.51253e-16
SUPT5H	-0.495286	2.48276e-13
SEPTIN7	-0.495977	1.68829e-20
FAM133B	-0.498162	2.38492e-13
FOS	-0.498309	1.34595e-21
SELENOS	-0.500102	7.10056e-18
SEC61G	-0.500984	2.9709e-15
GABARAPL1	-0.501166	3.73029e-16
DEK	-0.501305	2.67964e-15
CALM2	-0.50265	1.27934e-22
CSKMT	-0.502826	1.76775e-13
LPIN1	-0.503126	1.50392e-12
SON	-0.503585	1.41103e-22
RSBN1	-0.504498	4.70773e-16
EPB41L4A-AS1	-0.50508	6.78121e-20
CD63	-0.506902	7.03567e-10
CPD	-0.507697	8.82318e-11
ENY2	-0.508161	7.10783e-16
RPL23	-0.509184	2.3799e-45
TAF1D	-0.513941	3.539e-23
AC007952.4	-0.514243	2.85731e-31
EIF1B	-0.515269	1.41161e-16
IPCEF1	-0.518121	2.78042e-17
NAP1L1	-0.519823	4.35622e-35
STOM	-0.522095	6.71829e-16
ATP6V0C	-0.523387	1.0584e-12
AL021155.5	-0.525274	7.9791e-20
CREBZF	-0.527254	1.99578e-14
AC026979.2	-0.527705	1.68936e-15
MOB1A	-0.528277	2.2642e-17
IQGAP2	-0.531358	7.80969e-17
RPL27A	-0.53289	3.49923e-72
CANX	-0.53565	1.4882e-18
CSNK1D	-0.537164	1.31838e-18
KDSR	-0.539191	1.19472e-18
STMN1	-0.541835	6.80087e-22
ST3GAL1	-0.542418	6.93033e-19
RNF115	-0.5431	2.7708e-20
METRNL	-0.543629	6.67856e-15
CELF2	-0.546558	3.42993e-22
H3F3A	-0.548817	1.46535e-19
SAP30	-0.55071	1.45718e-13
POLR1E	-0.551222	9.54878e-19
SPCS2	-0.554564	1.6074e-23
SEC14L1	-0.554602	5.43751e-19
AKAP13	-0.554836	2.65959e-32
RSL24D1	-0.557017	8.43772e-24
CYSTM1	-0.559014	7.42179e-05
SSR3	-0.55983	2.62719e-21
BRI3	-0.562925	1.09393e-06
H2AFZ	-0.563864	2.5278e-23
TRAM1	-0.564382	3.00105e-24
CD69	-0.564765	6.67753e-18
SFTPC	-0.565257	3.70226e-27
RPL23A	-0.565907	2.8682e-83
SLA	-0.567408	1.3783e-21
BTG1	-0.567637	9.56114e-53
MGAT4A	-0.573011	6.01793e-25
AKNA	-0.574368	2.66456e-13
RPL21	-0.581302	2.05471e-65
HPGD	-0.582929	4.90672e-25
NASP	-0.586369	2.90739e-23
WAKMAR2	-0.586703	1.17577e-18
HSP90B1	-0.587315	7.1997e-34
DDX21	-0.589024	5.72881e-28
MYH9	-0.589282	1.15025e-23
GADD45A	-0.589363	9.10066e-14
KLRB1	-0.590886	6.99862e-12
MANF	-0.591592	1.97085e-31
IFI16	-0.594188	3.57313e-22
GPR65	-0.59508	1.27769e-21
RPL9	-0.602342	1.42167e-66
RPL7	-0.606595	5.07078e-61
DNAJB9	-0.607184	1.50566e-26
AC010883.3	-0.607547	7.87926e-25
XBP1	-0.609971	1.23307e-31
DDX18	-0.616706	1.62755e-27
MTHFD2	-0.61909	2.11739e-23
SRSF3	-0.620124	1.91586e-38
AC245014.3	-0.620166	1.3915e-20
NAP1L4	-0.620828	5.34892e-26
KTN1	-0.626204	3.70204e-26
RESF1	-0.627285	1.98963e-26
RBMS1	-0.627454	2.35612e-24
SMIM3	-0.62841	3.38695e-31
PPP2R5C	-0.631113	1.52889e-37
LAG3	-0.634318	1.55559e-24
ELOC	-0.639149	8.29763e-24
AC016831.5	-0.647692	1.31448e-28
SNHG12	-0.652054	2.79725e-30
TPSAB1	-0.654901	6.33217e-29
CD8A	-0.667364	1.5126e-14
NFIL3	-0.668617	7.80775e-31
SEC62	-0.679623	2.29234e-28
SYTL3	-0.680167	2.10358e-37
HSPA5	-0.682251	3.08495e-39
CASP8	-0.684169	7.83896e-28
FTH1	-0.68446	9.71513e-13
SYAP1	-0.685367	2.8173e-29
AC027279.1	-0.689777	3.56053e-32
AC016831.1	-0.689904	3.22287e-34
KLF6	-0.691227	8.57422e-56
SNHG6	-0.694084	3.51357e-61
RPL37A	-0.696987	4.77558e-104
IKZF3	-0.699494	6.36149e-31
PFKFB3	-0.699902	2.51163e-30
PPP1CB	-0.717438	2.01233e-44
CLDND1	-0.717548	6.09007e-34
CD53	-0.721412	3.69236e-43
HNRNPUL1	-0.72428	7.34496e-38
TMEM107	-0.731127	4.85979e-28
LINC-PINT	-0.739124	1.05764e-43
ATF4	-0.739928	2.18886e-44
TOB1	-0.743537	2.01455e-28
KLF9	-0.76224	7.60273e-41
SC5D	-0.77587	1.89671e-38
BIRC3	-0.783418	1.26475e-38
SYTL2	-0.785142	1.51003e-29
ZBTB16	-0.787522	3.87606e-47
RPS17	-0.787831	3.77018e-80
IFITM2	-0.788538	4.88554e-16
CCL20	-0.789935	0.00143353
FKBP11	-0.7932	1.26742e-40
GZMB	-0.798628	2.09598e-17
RPL13A	-0.802893	8.39511e-108
FKBP5	-0.829255	2.09799e-49
CITED2	-0.831205	2.73044e-33
ALOX5AP	-0.832229	4.70079e-19
MT-ND5	-0.849174	1.35958e-56
LPAR6	-0.851592	8.14218e-44
MRPL1	-0.853088	1.44522e-39
MT-CO3	-0.862239	5.89619e-110
SOCS1	-0.866159	3.91302e-49
NFE2L2	-0.867504	2.37531e-53
HERPUD1	-0.873002	5.17961e-63
SMAP2	-0.87762	5.50432e-75
HNRNPH1	-0.87855	1.30349e-58
NEAT1	-0.880816	1.97326e-52
ANKRD28	-0.909044	5.47333e-54
MT-CYB	-0.909252	5.46947e-88
ZFAS1	-0.924563	4.58943e-108
AC058791.1	-0.932233	3.2005e-51
RPL38	-0.932808	1.35733e-136
TIPARP	-0.942807	4.84402e-58
UGP2	-0.944441	5.87147e-58
CNOT6L	-0.968945	1.7965e-77
ZFP36L2	-0.969306	1.69876e-123
ID2	-0.983047	6.83213e-63
SOD2	-0.991808	7.35534e-06
CXCR4	-0.994759	5.51375e-122
FAM177A1	-0.999532	1.038e-62
LINC01871	-1.00046	6.89919e-65
MT-ND1	-1.0054	1.33142e-93
AC253572.2	-1.01108	3.11806e-28
AREG	-1.02525	9.71158e-39
CEBPB	-1.03192	1.03538e-62
IFITM3	-1.05155	1.79124e-10
IFNGR1	-1.07416	6.66308e-70
RPS20	-1.09372	2.18044e-137
TSC22D3	-1.09532	1.27337e-113
SUPV3L1	-1.10924	3.05452e-88
MAF	-1.15321	1.84552e-52
CCL3	-1.16911	6.22111e-13
RPL41	-1.178	1.70991e-163
PRF1	-1.187	2.98732e-46
RPS10	-1.20135	3.88134e-116
RGS1	-1.20901	6.64385e-73
TXNIP	-1.2094	1.76842e-156
SRGN	-1.23292	2.0798e-190
GPR171	-1.24588	9.42874e-85
RPS29	-1.2462	3.55237e-194
PRDM1	-1.25061	1.15743e-131
BCL2A1	-1.27848	6.3749e-18
IL7R	-1.29817	1.14293e-199
MT-ATP6	-1.31542	1.60634e-162
MT2A	-1.32607	8.68664e-13
CRYBG1	-1.36377	7.16355e-124
MT-ND4	-1.39036	2.26355e-151
MT-ND3	-1.41245	3.27273e-151
MT1X	-1.50821	7.86735e-14
MT-CO2	-1.54693	6.12992e-244
MT-ND2	-1.56664	8.09306e-186
CXCL8	-1.56918	2.92739e-57
MT1E	-1.69823	6.08085e-07
S100A9	-1.83866	1.36862e-22
CH25H	-2.0746	1.32685e-113
CCL4	-2.36813	4.60798e-100
Note: Avg_log2FC>0 genes overexpressed in HSPhi CD4 T cells of IPF lungs; Avg_log2FC<0 genes overexpressed in HSPhi CD4 T cells of control lungs.

## Sheet: table S6 FOXP3hi vs FOXP3lo 
table S6. Differentially expressed genes in FOXP3hi vs. FOXP3lo Tregs
Gene	Avg_log2FC	Adjusted_pValue
CD177	1.96527	2.50672e-114
TNFRSF4	1.52828	2.83635e-92
LAIR2	1.51476	4.5578e-93
TNFRSF18	1.36422	4.80106e-105
CTSC	1.33309	1.26485e-97
S100A4	1.28286	7.99922e-118
FOXP3	1.15507	3.03338e-77
IL2RA	1.13345	5.62049e-72
IL1R2	1.13074	9.56437e-64
LGALS1	1.11706	1.51549e-53
CCR8	0.995373	2.32523e-82
PKM	0.928029	8.23728e-43
ACTB	0.892828	2.50303e-46
LINC01943	0.886584	5.75257e-58
ARPC1B	0.884929	1.6615e-58
ENO1	0.87419	7.36972e-57
IL32	0.873446	1.24319e-104
S100A6	0.856488	3.3654e-61
LAYN	0.855223	4.91051e-75
HLF	0.843365	3.82012e-26
IGFLR1	0.835907	1.64189e-46
SYNGR2	0.830298	2.27908e-39
DUSP4	0.827492	3.00457e-43
GLRX	0.818305	1.0661e-46
GAPDH	0.808811	1.33868e-61
SLAMF1	0.802712	1.98433e-49
LGALS3	0.796647	6.97496e-50
GADD45A	0.795969	9.77864e-34
PFN1	0.794863	3.83148e-49
IL2RG	0.765186	2.42444e-66
IL2RB	0.753006	1.05777e-45
PGAM1	0.752088	1.22859e-39
TXN	0.748574	1.08073e-37
CTLA4	0.739805	3.69097e-42
HLA-A	0.739314	1.14382e-105
DNPH1	0.734325	6.28593e-43
LY6E	0.730851	1.07306e-43
TNFRSF1B	0.727147	3.0946e-49
FKBP1A	0.722578	7.72743e-46
IFI6	0.71932	1.84009e-31
CD27	0.712938	2.79848e-38
HLA-DRB1	0.69979	4.35042e-38
HLA-DQA1	0.697735	8.14786e-25
ACP5	0.694163	8.37634e-35
HLA-C	0.689698	2.43887e-73
CST7	0.687905	1.50169e-31
CD74	0.686605	6.25613e-39
BATF	0.686249	1.12977e-60
PCSK1N	0.682686	1.73404e-12
CORO1B	0.676376	3.49186e-28
TNFRSF9	0.676112	1.38063e-51
RAC2	0.675963	8.0114e-41
PRF1	0.675357	5.02108e-25
LINC02195	0.674202	2.57342e-41
CRIP1	0.666533	1.7558e-32
CXCR6	0.665783	1.04281e-44
CD7	0.658537	1.16959e-32
LINC02099	0.657337	2.53505e-55
METRNL	0.654802	1.71487e-36
EFHD2	0.652569	2.98016e-31
SELPLG	0.646629	2.44047e-38
ANXA2	0.646185	1.69954e-36
S100A11	0.63696	2.01524e-31
PHLDA1	0.634039	2.2525e-37
TIMP1	0.633767	5.23636e-18
IL1R1	0.633438	3.45347e-35
CD82	0.632951	2.00784e-30
CD4	0.627074	5.06704e-32
LSP1	0.626282	6.83437e-29
CD70	0.616146	4.52497e-29
HTATIP2	0.613829	3.21409e-33
HLA-DPA1	0.613487	1.16679e-34
ITGB2	0.601918	2.04881e-33
SEC14L1	0.597232	2.2784e-36
ZNF282	0.591386	8.11939e-30
CAP1	0.588765	8.85294e-35
LAPTM4B	0.58689	1.7491e-30
ENTPD1	0.585238	2.53771e-33
DYNLRB1	0.57956	1.76327e-28
HLA-B	0.579333	2.76189e-75
ZC2HC1A	0.577865	2.21094e-26
EMP3	0.577788	2.54278e-24
CORO1A	0.577437	2.59297e-20
ATP5MC3	0.567631	3.01329e-29
CTSD	0.567082	5.19847e-34
TMED9	0.565814	2.14894e-39
CLIC1	0.565181	5.66745e-37
BST2	0.564536	3.46399e-28
FNDC3B	0.554866	1.84775e-31
COX5A	0.546851	5.76405e-27
DYNC1I2	0.545714	5.67828e-21
UCP2	0.545684	1.26076e-21
ICOS	0.543338	1.39837e-30
TYMP	0.539681	7.22807e-25
FRMD4B	0.538127	2.64334e-28
PGK1	0.538023	1.58071e-18
CD3D	0.536781	7.55628e-28
TRAC	0.532406	2.98434e-06
HLA-F	0.531779	3.32566e-26
PPP1CA	0.53129	3.59643e-25
AKIRIN2	0.528159	1.71149e-32
ARL6IP5	0.52777	2.04242e-34
ANXA6	0.526906	9.6323e-27
APLP2	0.5256	1.19463e-26
AC017002.3	0.525001	7.92548e-37
CTSB	0.523575	6.08065e-21
NKG7	0.521824	0.00537913
CAPZB	0.514608	3.48832e-36
CARD16	0.513762	8.94857e-32
SDF4	0.509153	6.15634e-32
CTSA	0.508937	4.03278e-32
COX6C	0.508829	3.21882e-32
SEC11C	0.508206	4.9805e-27
CD59	0.508061	1.8925e-20
SPOCK2	0.507256	7.59007e-24
VAMP8	0.505555	8.16182e-33
SH3BGRL3	0.50362	2.78646e-27
LTB	0.500676	5.68096e-08
CADM1	0.500188	1.15543e-23
MYL6	0.499277	5.71091e-42
CD3E	0.499247	4.8079e-27
MYO1G	0.496182	2.02738e-20
CD79B	0.495233	8.57496e-37
ATP5MF	0.495204	1.72711e-34
RPS27L	0.49414	5.51952e-29
TIGIT	0.494116	9.36273e-25
CASP1	0.493485	1.97608e-33
CTSZ	0.493058	8.27334e-31
LAPTM4A	0.492999	3.13193e-23
C17orf49	0.491009	4.8542e-25
C9orf16	0.490974	6.89857e-23
RAC1	0.490228	3.85841e-30
ACOT9	0.489824	9.22312e-26
PDIA6	0.489376	7.51355e-30
ANXA5	0.484688	3.14185e-29
METTL9	0.483168	3.51221e-20
PSME2	0.480641	8.75032e-17
PPIB	0.47848	3.3883e-32
PSMB9	0.477833	1.72831e-33
ICAM3	0.47407	5.42238e-23
ARPC3	0.472561	3.71072e-29
CYBA	0.472241	4.41025e-30
CMTM6	0.472073	5.29526e-16
BAX	0.471996	4.91164e-24
ATP5F1E	0.470877	1.53502e-30
RNF187	0.468144	5.50802e-28
MYL12B	0.466287	2.17349e-25
CFL1	0.465856	5.38883e-29
COX8A	0.464784	2.83679e-27
DDOST	0.462161	1.56914e-22
HLA-DRA	0.461818	9.23387e-07
RHOC	0.461437	9.07775e-20
B2M	0.460206	1.0067e-61
ACTG1	0.459652	1.09806e-13
PRDX1	0.45548	1.40058e-23
TSPO	0.455079	2.56028e-21
LAG3	0.454183	1.63247e-06
BSG	0.452202	3.52272e-29
TPP1	0.450936	5.00666e-31
CD58	0.450474	5.58479e-23
CFLAR	0.448946	1.13281e-23
ARPC4	0.448264	4.65569e-27
GNG2	0.444707	1.46168e-23
PRDX5	0.444382	4.81799e-28
BRK1	0.443021	2.41191e-24
CCND2	0.442953	7.27435e-20
NDUFA4	0.442865	1.36604e-19
FANK1	0.439331	5.48909e-30
KAT2B	0.439162	2.15128e-31
CAPG	0.439068	1.22885e-10
DBI	0.438623	6.58748e-24
LAT	0.438593	2.91583e-19
SERF2	0.438435	7.97832e-29
IL1RN	0.437139	6.63991e-19
SPCS1	0.436489	1.91118e-21
GRINA	0.435354	3.88362e-22
COX17	0.434124	2.94389e-19
C21orf91	0.433984	3.50922e-18
CRADD	0.433861	1.84484e-21
RHOG	0.433191	1.63233e-18
NDUFA13	0.432506	1.72347e-33
MYL12A	0.43239	2.38527e-25
SSH1	0.432209	1.31467e-28
CALR	0.430988	9.08328e-20
CDK6	0.429226	1.13149e-23
WDR1	0.428963	2.11942e-25
UQCR10	0.42649	7.65331e-23
RHBDD2	0.425604	5.78068e-22
IQGAP1	0.423891	7.36433e-34
PPM1G	0.423582	4.09656e-21
TMEM50A	0.423341	2.14816e-31
STARD7	0.42256	1.12231e-12
UQCR11	0.422502	3.54206e-24
RBBP7	0.420737	7.14134e-16
SDC4	0.41985	2.81188e-20
SPATS2L	0.417716	1.03172e-24
SUMO2	0.417372	1.25737e-21
CALM3	0.416121	6.20249e-20
NDUFA12	0.415839	5.41504e-26
GNG5	0.415516	3.19708e-20
SQOR	0.414498	2.68079e-24
RBX1	0.413943	1.80573e-27
APOBEC3C	0.411954	1.20164e-18
CAPN2	0.41069	1.057e-22
TRAPPC1	0.410215	1.5066e-23
HLA-DRB5	0.409531	3.85743e-17
CKLF	0.409353	2.10451e-17
ANAPC11	0.408663	7.49898e-25
TMSB10	0.408571	7.12905e-27
CD2	0.408474	4.77128e-21
MVP	0.408227	7.32496e-27
ANKRD10	0.407972	2.746e-19
HLA-DPB1	0.407832	2.01245e-19
PIM2	0.407576	3.50953e-16
CD3G	0.407359	2.31723e-16
PSMB1	0.407236	9.05769e-29
EDF1	0.407209	5.09916e-24
COX6A1	0.406972	1.16129e-25
ARF6	0.406753	1.23913e-26
NSF	0.406573	2.61004e-20
RHOA	0.405895	1.39555e-28
PHPT1	0.405403	1.58357e-19
TXNDC17	0.404717	7.63207e-19
ICA1	0.404286	7.35291e-11
NDUFB8	0.403687	5.884e-29
ISG15	0.403568	3.85761e-12
OSTF1	0.40108	3.24391e-19
LMAN2	0.399046	4.43869e-28
LRRFIP2	0.39812	1.35983e-19
GRN	0.396309	1.30072e-21
ISCU	0.396272	3.76522e-19
CSK	0.395669	1.31388e-19
ZNRF1	0.395231	2.06222e-27
TMEM258	0.393436	6.1061e-24
NDUFB2	0.392791	1.21616e-28
HCST	0.391788	8.40976e-15
SPPL2A	0.391766	1.78489e-21
PSMB10	0.391104	2.00781e-22
NDUFC2	0.390413	2.13382e-23
ROMO1	0.390404	1.54583e-25
LY75	0.389502	1.55754e-20
PBXIP1	0.387659	1.51775e-19
SERPINE2	0.38666	8.8332e-20
GMFG	0.386337	1.4122e-26
NAMPT	0.385525	3.05056e-24
TRIB1	0.385183	3.8814e-15
PSMA2	0.384974	1.1411e-20
G3BP2	0.382323	1.45258e-19
ARPC2	0.38217	2.22115e-20
SRP14	0.381254	9.96517e-19
UQCRQ	0.381234	1.87304e-19
RPN2	0.380523	1.42418e-22
ATOX1	0.379138	1.73992e-23
APOBEC3G	0.377953	2.40161e-23
RNF213	0.377221	5.91881e-17
C4orf48	0.376575	2.64029e-18
RAB9A	0.374261	9.15681e-16
LRPAP1	0.374152	9.1793e-22
CD63	0.374051	4.70771e-19
MDFIC	0.372776	5.42459e-22
ANXA11	0.372583	4.86346e-20
PSMB3	0.372322	8.22812e-19
CEP55	0.371918	6.24508e-18
SLC25A3	0.371908	1.13509e-19
PRDX4	0.371718	1.13163e-18
CD52	0.370715	1.73444e-11
S100A10	0.370347	3.72108e-07
BCL2L1	0.370074	6.30687e-17
ARHGEF6	0.368549	5.90272e-23
GCNT1	0.368429	2.15698e-22
LAMP1	0.367814	3.90865e-19
SLC16A1	0.367771	1.44622e-11
ACTR2	0.36754	9.03437e-22
ARPP19	0.367153	3.61523e-20
TBCB	0.366178	1.66444e-17
CLEC2D	0.366007	3.10954e-07
ARF5	0.365882	4.3926e-22
FBH1	0.365633	2.74447e-12
VDR	0.365028	1.74899e-22
ATP5MPL	0.364594	1.89577e-23
RBPJ	0.363878	1.18356e-14
PTP4A3	0.363634	3.45036e-13
ATP6V0B	0.362561	2.17185e-21
TMEM59	0.362509	6.08235e-21
NPTN	0.362107	2.13253e-20
CUL9	0.361827	9.05115e-20
MIR4435-2HG	0.361565	5.84366e-20
UBE2L6	0.361541	5.80551e-14
PSAP	0.361501	1.42103e-16
ITGB1	0.361043	2.85118e-18
HILPDA	0.360775	1.40505e-11
NEDD8	0.360481	7.5352e-26
ARF1	0.360276	1.97637e-23
PTTG1	0.358987	2.06092e-20
PHTF2	0.358977	1.64855e-26
NDUFA11	0.358542	3.13305e-27
GATA3	0.358351	6.0386e-17
FERMT3	0.356057	7.44254e-15
CAPNS1	0.355475	1.07407e-18
ATP6V0E1	0.355425	4.25099e-25
ACTR3	0.355055	2.37971e-14
VDAC1	0.354562	4.26691e-20
SPN	0.354459	3.50723e-13
CDC42	0.353919	1.53015e-20
NDUFB4	0.353816	5.48784e-20
MAGEH1	0.353334	0.0150728
ACTN4	0.353044	6.13908e-25
SRM	0.352234	1.35251e-17
SEC61B	0.352161	7.15078e-22
STAT1	0.351467	2.74665e-08
CHMP2A	0.351093	4.34877e-13
VIM	0.351008	5.59423e-11
PCED1B	0.350405	9.06557e-22
NDUFS6	0.350095	2.28541e-26
COPE	0.350082	4.81947e-23
ATP1B1	0.349941	4.1349e-12
ISOC1	0.349831	1.22708e-23
UBL5	0.349693	3.41653e-18
JMY	0.349609	3.10618e-13
HLA-DMA	0.349088	1.32792e-16
EBI3	0.348695	9.36641e-26
P4HB	0.34811	2.28674e-20
PSMA6	0.34811	1.40133e-16
MAP2K3	0.348077	9.27212e-19
TRAPPC5	0.347891	6.86838e-20
ARPC5	0.347733	1.80972e-14
RANBP1	0.347305	9.38647e-15
MSN	0.347247	2.69197e-14
SIRPG	0.34669	4.65784e-15
ELOB	0.345703	2.34191e-28
IL21R	0.345655	2.34662e-17
HPGD	0.345202	5.50183e-09
SUB1	0.344868	2.34029e-21
RASSF5	0.34483	6.97525e-15
ALDOA	0.344397	1.06974e-16
TMEM173	0.343294	2.38862e-12
ZDHHC18	0.343017	9.07245e-12
MYDGF	0.342958	2.14781e-12
CD53	0.342539	1.81059e-18
JAK1	0.3423	1.10126e-14
LTA	0.341859	9.77827e-11
CD80	0.341697	8.43248e-19
LFNG	0.341549	4.31008e-12
NINJ1	0.341386	3.35668e-16
HM13	0.341108	1.26782e-18
SURF4	0.340053	1.47268e-19
SSR4	0.339897	4.30979e-16
ANP32A	0.339161	1.29722e-22
SNRPC	0.33907	6.33351e-17
LMAN1	0.337527	2.43372e-16
IFI27L2	0.336939	3.435e-23
GPI	0.335939	5.92195e-16
MBD2	0.334967	5.86828e-22
LINC01588	0.334547	9.51946e-14
DR1	0.333747	1.05354e-17
VMA21	0.332909	7.90799e-20
PARD6G	0.332789	3.19108e-14
SNX10	0.331701	1.96167e-14
PSMB6	0.331356	4.91853e-29
TMED10	0.331218	1.09203e-20
BTG3	0.330558	1.4059e-15
PSMB8	0.330446	6.172e-23
MGAT1	0.330264	1.57337e-21
TAP1	0.32872	7.0193e-15
HERPUD1	0.328332	3.256e-18
GNAI2	0.327801	8.78236e-17
NDUFB7	0.327409	1.00977e-20
CPD	0.327296	5.41666e-21
MAP4K1	0.326858	1.99271e-15
MRPS21	0.326591	2.19172e-16
NDUFB3	0.32648	1.12709e-15
NDUFS8	0.325921	1.43955e-15
GSTO1	0.325228	5.65699e-17
CANX	0.324379	2.8543e-17
CISD3	0.324368	1.93565e-21
ILK	0.322794	7.32102e-20
NDUFA7	0.322718	9.99358e-23
ARHGEF12	0.322498	4.58816e-26
LCK	0.322407	1.40653e-16
TMC6	0.32219	1.45587e-15
HAVCR2	0.321961	8.55068e-25
TMX1	0.321491	1.9131e-14
SEC61G	0.321117	3.81281e-21
SERBP1	0.320738	1.07934e-19
PFDN2	0.320373	1.00316e-11
LDHA	0.319589	2.98544e-14
NUDT5	0.319587	5.5456e-22
MDH1	0.31952	2.34076e-17
HLA-DQA2	0.318692	2.62212e-08
PHACTR2	0.317088	2.58006e-18
SLC1A5	0.316411	2.9236e-11
ST8SIA4	0.316037	2.22962e-18
PPP2CA	0.314981	3.44722e-12
GABARAP	0.314423	6.54482e-13
SDF2L1	0.314286	1.14775e-12
RNASEK	0.314224	1.58558e-18
CCDC167	0.313875	3.10906e-20
WDR83OS	0.313626	2.5035e-19
MIIP	0.313032	5.26668e-08
CMTM3	0.312537	3.49367e-14
OAS1	0.311551	4.99882e-13
RPN1	0.311079	3.74917e-22
CTNNB1	0.31072	1.12924e-12
ATP6V1F	0.309223	4.06557e-22
UBALD2	0.308842	1.38464e-12
PRELID1	0.30874	8.60294e-19
PAK2	0.307783	5.39609e-16
TNIP2	0.30777	2.41808e-13
MXD4	0.307626	2.97994e-18
FIBP	0.307227	2.44737e-15
SLCO4A1	0.307068	3.66315e-06
KRTCAP2	0.306713	2.25642e-18
PARK7	0.306682	2.98993e-20
COX5B	0.306554	2.7025e-21
PTP4A2	0.306008	9.86118e-17
ATP5MD	0.30533	5.12268e-16
ATP6AP2	0.304879	1.54154e-26
POLR2L	0.304751	1.15962e-18
AP1S2	0.304547	1.74004e-15
RAB2A	0.303973	4.60196e-17
AUH	0.303106	1.06517e-11
RAD21	0.302766	1.29217e-15
ECH1	0.30269	2.86965e-21
MFSD10	0.302124	4.32728e-12
REEP5	0.301803	1.11048e-20
CNIH1	0.301752	8.15328e-08
NAB1	0.301643	4.18938e-18
ACADVL	0.300725	3.55575e-16
TMBIM6	0.300369	2.36084e-11
PIN1	0.30023	7.3239e-14
TPM3	0.299776	1.35645e-14
AIP	0.299405	1.86743e-18
IGF2R	0.299034	1.44259e-17
NDUFB1	0.298667	1.62667e-12
PPP2R1A	0.297277	1.1752e-16
GNAS	0.297112	1.17702e-10
LPXN	0.296536	2.95608e-20
PIM3	0.296132	4.35372e-05
MAST4	0.296074	1.11183e-20
COPZ1	0.295919	1.52662e-11
COX7A2	0.295819	3.71528e-13
IL12RB1	0.295559	1.56519e-15
HIST1H1E	0.295454	0.00226816
PPP1R18	0.295047	1.00638e-15
ADTRP	0.294913	8.89694e-05
PSME1	0.29477	7.02656e-14
TAPBP	0.294551	1.32695e-12
PPP4C	0.293733	4.26833e-16
SNX17	0.293563	1.10219e-14
SKP1	0.292517	4.09886e-14
OS9	0.292037	1.75032e-25
ATP5F1C	0.291758	9.18476e-12
IL1RL1	0.291477	0.0118397
ARHGDIA	0.290941	9.43436e-14
ATP5F1B	0.290692	7.33902e-18
GBP2	0.290149	3.89975e-16
COMMD7	0.290121	5.3607e-18
RAB7A	0.290104	1.2706e-22
DEF6	0.289888	1.3082e-12
NDUFC1	0.288691	2.97504e-20
CREB3L2	0.288625	5.33987e-17
TLN1	0.288516	6.83078e-17
SUMF2	0.288247	1.04205e-12
FKBP8	0.28768	3.28995e-16
GTF3C6	0.287549	5.91048e-17
B4GALT5	0.287528	4.00537e-20
NDUFA1	0.287489	1.96918e-23
GHITM	0.287397	9.95342e-16
ADORA2A	0.287303	3.40947e-14
POLR2E	0.286256	2.57279e-20
GNB2	0.286142	4.44277e-16
CHCHD2	0.285917	2.67939e-13
CCDC50	0.285338	4.68794e-10
TPI1	0.285051	1.42601e-16
ATP5MC1	0.284734	2.41689e-13
MDH2	0.284445	4.21452e-22
TNFRSF13B	0.284017	6.79005e-18
CCDC6	0.283695	5.49655e-13
C15orf61	0.283461	6.26723e-07
ARHGAP9	0.283298	5.85561e-20
PSMB2	0.282422	1.42424e-10
SEC11A	0.282354	8.75638e-19
EML2	0.282325	2.19722e-18
SH3GLB1	0.282019	1.10127e-13
COL9A2	0.281914	3.11656e-15
BRI3	0.281554	3.20979e-10
TMBIM4	0.281447	1.30141e-15
AQP3	0.28141	5.31929e-06
PSMD8	0.281404	5.59334e-18
H3F3A	0.281354	8.23855e-21
ACSL4	0.28108	1.70876e-11
ANTKMT	0.280805	3.61543e-17
BAK1	0.279995	1.72284e-14
POLR3GL	0.279959	1.75429e-09
COX7B	0.279953	1.00097e-17
CISD2	0.279822	1.10869e-10
MAT2B	0.279752	2.14563e-19
PLAGL2	0.2797	4.81488e-12
SEM1	0.278603	9.9102e-17
RNF181	0.278544	1.48307e-19
F5	0.278426	2.93015e-07
ORMDL3	0.278213	5.07529e-16
CD247	0.27814	2.80298e-14
LCP1	0.278136	0.000122651
MT-ND6	0.278104	1.92277e-05
PSMA5	0.278073	4.47766e-17
SLC25A4	0.278002	3.60528e-08
TBC1D4	0.277807	1.03722e-11
TUFM	0.276972	1.51421e-12
PRDM1	0.276827	2.03666e-21
TNIP1	0.276624	3.86598e-13
PRNP	0.276508	3.85415e-22
PTMS	0.275662	1.27906e-10
SH3BGRL	0.275515	5.24715e-14
SNRPD3	0.274927	1.37808e-16
PMVK	0.274812	4.74815e-12
MICOS10	0.274186	1.56763e-09
PTPN1	0.274094	2.85693e-19
SEPTIN1	0.273775	2.3196e-11
ID2	0.273438	1.49672e-10
SH2D2A	0.273223	1.4681e-09
BLOC1S1	0.27296	1.77175e-18
CYC1	0.272713	7.50569e-23
CHST12	0.272578	3.95315e-18
MRPS34	0.272416	1.13624e-20
ERH	0.272225	8.83374e-16
DCTN3	0.272101	6.23685e-16
PCED1B-AS1	0.27205	9.30317e-08
PEBP1	0.271924	1.58292e-15
NDFIP2	0.271507	3.77874e-17
ITGAE	0.271185	1.75897e-12
HNRNPK	0.271	1.56995e-15
ATP5MG	0.270206	1.12444e-22
SOX4	0.270036	2.39083e-11
DERL1	0.269862	5.46083e-25
CD320	0.269802	2.82546e-12
MT2A	0.268542	1.45607e-10
HADHB	0.268468	1.38419e-11
ATP5F1A	0.268216	5.65114e-17
COPS9	0.267948	1.08291e-13
GCHFR	0.267919	1.03876e-11
NOP10	0.267105	2.89773e-18
CLIP1	0.267029	9.68048e-17
ERI1	0.266899	1.43991e-15
EMC10	0.26633	2.03784e-13
UBE2D2	0.266136	6.22847e-12
PPIA	0.265775	5.23638e-15
GABARAPL2	0.265563	2.18685e-15
FAS	0.265517	2.75853e-07
AFTPH	0.265461	4.18039e-16
FIS1	0.263808	4.85127e-17
GPR108	0.263472	4.43024e-11
ANAPC16	0.263246	3.75129e-17
OAZ1	0.263136	1.88971e-09
TMEM35B	0.263073	4.53243e-13
FUBP1	0.262985	9.57351e-17
BANF1	0.26298	2.12426e-13
RTCB	0.262642	3.71189e-17
AP2M1	0.261429	2.59061e-16
DCTN2	0.260887	3.26558e-08
RBM3	0.260519	1.6152e-14
FTL	0.259855	8.70254e-05
ITM2B	0.259559	1.06898e-09
CYB5R3	0.25955	1.67924e-07
KCNN4	0.259492	2.40279e-12
AC011611.3	0.259239	2.22411e-09
HNRNPA3	0.258601	2.55528e-13
IFI35	0.258484	2.28989e-11
LYPLA1	0.25826	3.09643e-16
ANTXR2	0.257959	4.16802e-13
LAMTOR5	0.257438	9.73857e-10
RANBP9	0.257356	7.22064e-14
BZW1	0.256117	4.90158e-14
SIT1	0.255617	8.18047e-08
SELENOT	0.25537	1.70206e-12
PLP2	0.255335	2.11961e-10
CYTIP	0.255215	9.68201e-09
TNFSF12	0.254841	1.3648e-16
NUCB1	0.254653	4.82728e-22
COX6B1	0.254518	1.74004e-12
INPP1	0.254077	4.98954e-14
EGLN1	0.25397	2.37362e-06
CTNNA1	0.253872	7.55013e-16
UGP2	0.25368	5.38883e-11
CUTA	0.253615	1.03224e-15
MRPS6	0.253305	2.25601e-09
ANXA7	0.253267	6.6852e-19
ATP5ME	0.252889	1.8214e-16
AP2S1	0.252759	5.25806e-15
CCR6	0.252434	1.14057e-09
NT5C	0.252048	1.25392e-11
UQCRFS1	0.251219	3.90663e-13
PSMD11	0.250116	1.25215e-11
EHD1	0.249635	6.6674e-12
HPRT1	0.249578	2.27643e-10
TALDO1	0.249323	5.02529e-16
COX20	0.248804	1.11064e-06
PRDX2	0.248615	1.63096e-16
VOPP1	0.248444	9.26279e-13
IER3IP1	0.24791	3.9752e-11
UBA1	0.247907	2.02484e-16
PRR13	0.247791	7.24254e-20
LAMTOR1	0.247461	1.52315e-14
PPT1	0.24744	5.26404e-16
TRAF3	0.24723	8.79769e-16
GLG1	0.247087	2.30109e-11
WASF2	0.246821	1.039e-17
GBP5	0.246089	3.25685e-16
POMP	0.246087	2.42259e-14
CD164	0.245082	2.82992e-23
OTULIN	0.244697	3.7964e-13
MEAF6	0.244692	2.36471e-16
TNIP3	0.244665	1.49818e-09
TMEM208	0.244396	3.96536e-08
DNAJB11	0.244272	1.25825e-15
NUTF2	0.244129	1.33775e-12
ABI3	0.24341	4.48257e-11
LSM7	0.243227	1.66712e-16
PAIP2	0.243021	5.29144e-14
SMS	0.242841	9.35015e-09
PPM1M	0.242788	1.55015e-10
HYOU1	0.242745	3.60237e-09
PLEC	0.242442	7.1547e-11
NDUFA9	0.242201	3.91321e-10
SDHB	0.24213	1.26284e-10
PTPRJ	0.241214	2.47729e-20
ACP1	0.241103	1.11032e-08
PLEKHG1	0.240927	0.0259248
TOMM6	0.240584	1.44533e-18
PSMF1	0.240273	4.89717e-12
ZBTB38	0.240185	1.17452e-11
MAP2K2	0.240161	2.40081e-14
PSMD4	0.240143	1.67194e-15
SUMO3	0.239962	2.46471e-09
FUT8	0.239331	4.47431e-07
JAZF1	0.239098	6.74375e-11
HTRA2	0.238467	5.22666e-07
SDHAF2	0.238224	9.91593e-10
EIF4G1	0.238191	1.25793e-09
ETFB	0.238161	8.5762e-15
GLIPR1	0.238066	1.37153e-10
PTPRCAP	0.238052	0.00534607
STMP1	0.238044	3.90753e-13
YPEL3	0.237799	6.44937e-17
RAB11B	0.237623	1.77044e-21
ATRAID	0.237532	6.70936e-18
ZNHIT1	0.237265	3.75988e-14
TMEM230	0.236988	1.46708e-09
MYH9	0.236716	1.78653e-05
RNF145	0.236586	2.60154e-17
SH3KBP1	0.236203	4.6761e-16
UXS1	0.235895	4.30805e-10
MRPL52	0.235635	1.40315e-13
PSMC5	0.235605	1.36027e-09
FUNDC2	0.235323	1.29787e-09
PFKL	0.235299	4.93602e-14
ATP5MC2	0.23504	2.13726e-10
EMC7	0.234748	1.11009e-15
SUMO1	0.234715	1.09313e-13
CUL1	0.234701	5.33981e-11
RHOF	0.234545	4.97147e-14
TMCO1	0.234333	3.38058e-14
STK17B	0.234288	6.42485e-09
RAB33A	0.234272	3.68606e-14
ATP5PF	0.23426	6.4918e-14
CHSY1	0.234241	6.71227e-08
NETO2	0.234161	2.60813e-11
GLB1	0.234154	3.34461e-09
PRKAR1A	0.234123	3.91121e-14
PSMB7	0.23409	1.85381e-12
NAA10	0.233583	3.79588e-10
ARHGDIB	0.233543	5.08515e-09
FMNL1	0.233241	2.48799e-16
ATP13A3	0.233217	5.82274e-14
TXNDC15	0.232617	1.28403e-19
MRPL33	0.23239	4.10452e-17
MGST3	0.23237	3.0387e-13
PDGFA	0.232331	2.66693e-13
PHB	0.232285	4.12204e-16
TM9SF2	0.232152	1.09256e-12
CD96	0.231726	4.56867e-13
VCP	0.231479	1.33123e-16
SEPTIN11	0.231419	8.88153e-18
CAPN1	0.231168	6.80028e-10
MAN1A2	0.230949	1.32136e-11
EIF6	0.230782	2.49644e-08
HLA-E	0.230754	1.19004e-12
TMEM179B	0.230538	1.36512e-14
SLC6A6	0.23026	5.33527e-10
KCNAB2	0.230035	1.09278e-10
FLNA	0.229988	9.00234e-11
SNX5	0.229925	3.6328e-13
DNAJC15	0.229737	3.25238e-13
RNPEPL1	0.228792	2.69409e-15
MRPL43	0.228543	3.46481e-09
JOSD2	0.228448	4.15366e-07
SLC25A38	0.228325	4.73459e-11
RFTN1	0.228121	1.49454e-10
PSMC2	0.228073	2.18979e-08
CD151	0.228	6.53543e-14
CHMP2B	0.227905	2.36127e-08
UQCRC1	0.227012	7.41803e-11
SELENOH	0.227009	6.882e-11
TEX264	0.226745	7.0628e-05
STXBP2	0.22641	9.71141e-12
PPP1R14B	0.226336	2.73136e-08
ATP6AP1	0.226277	7.58764e-13
HDAC7	0.226149	1.47123e-12
DGUOK	0.225812	1.51315e-09
ITGAV	0.225759	2.20886e-09
SLC7A5	0.225749	1.99534e-08
RALY	0.225502	8.07522e-19
IKZF2	0.225409	7.15022e-11
NHP2	0.225314	2.15922e-10
APMAP	0.225195	6.9972e-07
TXNDC12	0.22513	9.28959e-14
RCBTB1	0.22502	1.38209e-10
CLTA	0.224972	1.92499e-13
EIF4EBP2	0.2249	1.33572e-11
SH3BP1	0.224864	1.2763e-08
PDCD6	0.224783	6.2629e-12
GOT2	0.224713	1.39698e-08
AHNAK	0.224673	2.26851e-07
PRDX3	0.224584	3.58394e-10
PTPRA	0.224407	8.2379e-14
GNA15	0.224358	1.49843e-10
MEF2D	0.224353	8.60876e-14
COMMD1	0.224108	2.93304e-15
RBBP8	0.223995	3.96516e-11
MTHFD1	0.223693	4.52904e-11
JTB	0.223536	2.2633e-16
PPP1R7	0.223511	2.26498e-11
MEA1	0.223503	6.46267e-10
PA2G4	0.223451	2.41972e-15
TBC1D10C	0.223192	4.52489e-06
SAT1	0.223118	0.000726814
KDELR2	0.223035	6.50081e-09
GNB1	0.22268	1.67708e-12
DIAPH1	0.222602	3.21205e-18
HIST1H1C	0.222596	1.31994e-09
ITGAL	0.221487	1.16935e-08
METTL26	0.221188	1.25912e-12
PSMD7	0.220948	6.04427e-12
NDUFA6	0.220699	3.83763e-13
ADRM1	0.220618	1.569e-13
PXK	0.220599	6.49146e-12
OPTN	0.220378	2.10385e-17
GLUD1	0.220331	7.46274e-15
MZB1	0.220289	1.57489e-16
GNPTAB	0.219933	2.40078e-14
AKR1A1	0.219718	1.42457e-08
ORMDL2	0.219623	1.55166e-10
HNRNPR	0.219236	2.36836e-10
CNPY2	0.218554	4.5586e-08
RAB1B	0.218459	1.11388e-13
NAXE	0.218358	2.08208e-14
SDHA	0.218333	2.06181e-11
ODF3B	0.218115	4.67681e-11
STX10	0.218036	3.56491e-10
HEBP2	0.218004	4.99504e-17
PRMT1	0.217908	1.32766e-09
MFSD6	0.21777	1.52782e-08
JPT1	0.217481	3.11837e-13
C11orf98	0.217437	4.1077e-09
RAB10	0.216875	4.45105e-20
CHMP5	0.216719	3.9029e-08
CD99	0.216302	4.6414e-11
PGLS	0.216094	2.34796e-10
SELENOS	0.215967	0.000414576
CTSS	0.215335	9.08285e-09
TMEM160	0.215277	1.6071e-14
UQCRH	0.215217	2.99915e-12
CHURC1	0.214982	3.12058e-14
LCP2	0.214922	7.8994e-11
SLC43A3	0.214863	8.63407e-07
GUK1	0.214647	3.43407e-21
PGM2L1	0.214647	0.000396233
GSDMD	0.214513	3.95292e-11
SPCS3	0.214419	2.34606e-18
PPM1A	0.214361	8.8757e-11
CCT7	0.214009	2.24635e-09
PFKP	0.213906	4.6121e-10
NFIL3	0.213536	3.8638e-08
ADAR	0.213386	8.05637e-13
SGMS1	0.213071	4.2609e-12
ADD1	0.212685	7.49583e-15
LAMP2	0.212559	4.50293e-10
MTDH	0.212517	5.06223e-13
FDPS	0.21249	6.7393e-10
DCTN1	0.212346	0.000234354
ADAM8	0.211972	8.04695e-10
NME1	0.21195	2.1754e-10
PTPN7	0.211869	1.28512e-11
CHST11	0.211368	7.25953e-22
PSMA7	0.211292	1.48547e-10
UBE2Z	0.211278	2.95344e-11
CHMP4B	0.211127	1.67062e-05
VASP	0.211047	4.09131e-13
CD2BP2	0.210887	2.44808e-10
CYBC1	0.210799	1.53312e-10
WEE1	0.21063	0.00234311
HAPLN3	0.210514	1.11994e-05
TMEM248	0.209864	5.42296e-13
COTL1	0.209825	0.000884211
GRAMD2B	0.209741	5.62423e-11
MRFAP1	0.209719	4.50321e-06
AC008105.3	0.209564	4.99255e-10
LYPLA2	0.209456	7.36185e-07
DDRGK1	0.2094	1.43897e-05
YARS	0.208959	3.28831e-09
VAMP5	0.208941	1.60223e-09
ESYT1	0.208827	1.86275e-09
SELENOF	0.208314	1.7589e-12
CASP8	0.208177	2.62064e-17
HMGN3	0.208061	2.35869e-09
ALYREF	0.20787	2.01702e-11
CSF1	0.207841	2.33538e-06
EIF4E3	0.207747	1.12798e-08
GRSF1	0.207222	2.20274e-17
CPNE3	0.207153	1.50338e-10
ACLY	0.206884	1.47355e-06
TMOD3	0.206827	1.40442e-19
AGFG1	0.2065	3.88497e-07
FAM110A	0.206454	3.47452e-05
DBNL	0.206305	6.64412e-19
MPG	0.206254	1.60418e-13
NDUFAB1	0.206032	4.20397e-18
IAH1	0.205965	2.54002e-12
PDAP1	0.205877	4.80518e-08
ACAA1	0.20587	2.2558e-05
SCP2	0.205624	1.8412e-06
TMED2	0.205617	1.87395e-14
MRPL20	0.205557	1.71545e-09
CD5	0.205555	6.46915e-15
ZFAND5	0.204368	8.24249e-10
ZBTB32	0.204175	1.00123e-08
ZFP36L1	0.203948	0.000465167
WAS	0.203941	4.34327e-14
PROSER1	0.203637	5.47262e-06
PSMC3	0.203629	3.52486e-13
EPSTI1	0.203521	1.51951e-15
THADA	0.202874	4.94694e-11
LAMTOR2	0.202469	5.58629e-10
SDHC	0.202263	2.89645e-10
CSTB	0.202068	5.47906e-13
HADHA	0.201863	1.3154e-13
TSPAN14	0.201835	2.13366e-07
ZCCHC2	0.201718	3.50355e-06
SLC25A39	0.201221	2.43083e-10
SRPRA	0.201198	2.82935e-08
IKBKE	0.201168	3.75401e-11
NDUFS7	0.201101	1.70174e-09
KIAA2013	0.200975	1.04379e-08
FAM104A	0.20078	1.78404e-12
PPDPF	0.200234	1.60292e-11
CEP57	-0.200214	8.96885e-09
KANSL1	-0.200224	1.6614e-08
TGFB1	-0.200746	2.45518e-05
AKAP9	-0.200783	0.0103042
CDC42SE2	-0.201774	0.0121273
CCNL1	-0.202849	1.7713e-06
HIST1H4C	-0.203362	0.000168806
KLF12	-0.203638	0.0163842
SRSF3	-0.203824	1.5682e-08
MPZL3	-0.20438	6.28984e-05
CYTH1	-0.204401	5.83661e-08
RNF149	-0.20535	5.26114e-14
PHF1	-0.206044	5.21367e-08
RPL17	-0.206139	9.32699e-11
ARID2	-0.207299	9.20317e-05
TNRC6B	-0.208483	0.00108765
RYK	-0.208752	0.00609118
FAM102B	-0.208891	0.000826864
ATM	-0.209636	2.12157e-08
MOB4	-0.209941	1.40013e-05
GPBP1	-0.209957	2.11351e-08
CREB1	-0.211424	2.04795e-05
NXT1	-0.212392	1.9353e-06
EIF5	-0.212424	4.82032e-06
SRSF2	-0.213843	3.71296e-13
RPL26	-0.214775	1.53758e-11
MYLIP	-0.215058	1.36824e-05
RPL27A	-0.215172	1.21947e-09
RPL7	-0.215186	5.23585e-16
SKI	-0.215616	0.0271673
NKTR	-0.218827	7.04078e-06
AC092821.3	-0.218946	0.0248288
GABPB1-AS1	-0.219453	0.00802182
CEP85L	-0.219817	0.00875679
RPS29	-0.220681	9.74639e-09
CHD1	-0.220837	1.01664e-09
ZNF506	-0.221305	0.00528038
FYN	-0.22204	5.88569e-10
SLC38A2	-0.222144	1.16965e-06
ZEB1	-0.223321	1.34036e-10
HELB	-0.223392	1.17684e-06
FOSB	-0.224439	0.00217488
CCDC66	-0.224651	7.72235e-06
TCP1	-0.22485	2.96541e-08
RESF1	-0.226594	2.04893e-12
ZBTB25	-0.226776	4.79691e-10
UAP1	-0.226817	0.00579524
GRASP	-0.227301	0.00171722
EIF3E	-0.228303	8.27621e-13
USP37	-0.229363	0.0223365
ELF1	-0.230725	6.36872e-16
CYCS	-0.230759	5.20472e-10
UBAC2	-0.231394	0.000258112
ERN1	-0.232049	4.5387e-05
DNAJB6	-0.233045	3.25214e-12
DUSP1	-0.233301	0.00523543
LY9	-0.234263	0.0120711
BCL6	-0.235406	0.00895858
SMAD3	-0.235524	0.00288523
SETD2	-0.235868	7.99591e-06
NACA	-0.236442	4.87243e-13
RPL23A	-0.237062	2.70955e-16
TUT4	-0.237346	0.000281193
MT-CO3	-0.238232	0.00369362
EEF1G	-0.239064	2.07532e-19
NEU1	-0.239403	9.67016e-07
KDM6B	-0.239946	0.0013655
ARHGEF3	-0.240087	0.00257518
JARID2	-0.240348	0.00791024
SATB1	-0.240422	0.0468145
RPS9	-0.240632	1.35809e-13
SNHG1	-0.240855	7.47762e-05
ETV6	-0.241944	0.0122684
SNHG12	-0.242759	2.73785e-08
VMP1	-0.24279	1.50537e-10
RPL36A	-0.243677	1.89819e-14
EEF1D	-0.24372	9.56136e-16
FTH1	-0.243838	0.000256063
FUS	-0.244961	1.11141e-09
NR3C1	-0.245257	3.11635e-14
KCNA3	-0.24566	0.0415781
TUBB4B	-0.246095	0.00015195
PPP1R10	-0.247186	2.17387e-06
PNPLA8	-0.24725	1.28952e-07
MBP	-0.247352	4.80188e-06
STK38	-0.248211	0.00180471
ZBTB20	-0.248234	0.000165697
NSMCE3	-0.248631	2.16959e-05
ABHD3	-0.248828	0.00392398
PNRC2	-0.249773	3.9263e-07
RPS7	-0.251128	2.48436e-19
EVI2B	-0.251406	4.83961e-05
AC025164.1	-0.253208	3.67915e-08
BAZ1A	-0.253444	7.7646e-13
ZC3HAV1	-0.254343	1.79876e-10
FCMR	-0.256331	3.0686e-07
EIF4A2	-0.25646	9.62786e-12
CRTC3	-0.257333	8.58683e-07
EPB41	-0.257546	1.5131e-05
GAS5	-0.258284	1.71505e-13
RPL28	-0.259238	8.36721e-17
DYRK1A	-0.259285	3.50099e-09
GTF2B	-0.260002	4.17366e-09
PHF20	-0.260771	4.56076e-11
TARSL2	-0.261234	0.0206379
GPHN	-0.261603	0.0412379
CHMP1B	-0.261722	0.000514463
KAT6A	-0.262442	1.87153e-10
RANBP2	-0.263096	9.82005e-06
PNRC1	-0.265122	1.45018e-10
HMGA1	-0.266069	1.41863e-05
ZFAS1	-0.266711	1.86236e-09
PPP1R15A	-0.268629	1.13156e-08
TUBA1B	-0.270066	0.000128711
MAT2A	-0.271712	0.000316622
STK17A	-0.272376	9.50629e-09
TGIF1	-0.273407	0.0283838
USP3	-0.273705	3.95614e-12
LINC00513	-0.274088	0.00100155
TRA2B	-0.274156	1.77824e-10
JUN	-0.274546	0.00686691
ZNF644	-0.274837	1.85964e-05
SOCS3	-0.275725	2.71366e-06
RPLP1	-0.276312	7.35544e-09
FKBP5	-0.276344	0.000997646
C9orf72	-0.277301	0.0246817
OSBPL8	-0.277596	1.04416e-10
TGFBR2	-0.279682	6.59678e-09
CXCR4	-0.280159	5.75926e-05
RPL10A	-0.280771	4.84357e-21
TOMM7	-0.280784	1.44577e-15
CEMIP2	-0.281657	1.84988e-11
YPEL5	-0.282921	8.70944e-13
BCAS2	-0.28304	1.72303e-06
AC016831.1	-0.283521	0.0229257
CHORDC1	-0.283915	8.7288e-08
UTRN	-0.284133	3.48021e-06
RPS20	-0.284293	4.28951e-12
RPS15	-0.286402	2.90834e-17
RALGAPA1	-0.286651	2.526e-07
TPT1	-0.287839	3.40815e-16
MCUB	-0.287861	0.000178542
SELL	-0.28871	3.4627e-10
SNHG8	-0.289451	1.85504e-06
MORF4L2	-0.290978	6.94961e-10
TNF	-0.291755	0.000689635
GPCPD1	-0.292148	2.93567e-12
ATXN7	-0.29367	7.09884e-09
SESN1	-0.295265	0.00711731
PIK3R1	-0.296471	1.37286e-12
SMCHD1	-0.296956	4.60192e-10
NFATC1	-0.297695	7.05729e-05
RPL9	-0.299153	1.64885e-16
CDKN2D	-0.300239	0.000154825
RSRP1	-0.300289	1.71862e-09
ZSWIM6	-0.300501	0.0030087
ZNF10	-0.301136	0.00135165
ARIH1	-0.301891	1.27745e-13
CYLD	-0.303729	7.44869e-11
AC093010.2	-0.306488	0.0106513
HECA	-0.306907	6.47661e-14
NUFIP2	-0.310089	1.38343e-10
KLF6	-0.312138	3.20725e-08
WDR74	-0.313234	6.35711e-07
CDKN2AIP	-0.313505	0.00153106
DUSP5	-0.313965	0.000215196
RPL5	-0.31407	6.32335e-22
RPL35A	-0.314816	9.45412e-28
DLEU2	-0.31567	0.00403271
TLE4	-0.317249	1.04446e-05
PARP8	-0.317878	0.000108046
RPL13A	-0.319464	1.60703e-11
LEPROTL1	-0.321694	2.01765e-18
AC026979.2	-0.322533	0.000257986
ATXN1	-0.322794	4.35883e-08
SARAF	-0.323596	5.98182e-15
AP3M2	-0.325418	0.00199476
MRPL1	-0.328881	0.00387379
GPR65	-0.329206	0.0276984
RPL12	-0.329237	3.60828e-20
TIFA	-0.329275	0.00011054
SNHG6	-0.33001	1.39196e-13
RPS21	-0.330425	1.02184e-29
INTS6	-0.33085	0.00245215
CHD2	-0.33335	8.70491e-13
NOP53	-0.33511	1.85119e-17
RPL18	-0.336099	2.52597e-31
BTBD9	-0.337224	0.0349168
LINC-PINT	-0.337265	0.0425189
MYADM	-0.337715	2.46838e-06
RPL22	-0.339305	1.08882e-25
RPS4X	-0.34038	4.13396e-34
DCXR	-0.340443	7.74303e-08
SLFN11	-0.343927	2.62851e-06
RASGRP2	-0.344491	3.50032e-05
EZR	-0.345144	1.15056e-18
FAM177A1	-0.34545	9.50185e-10
INPP4B	-0.345659	0.000278498
RPL36	-0.346097	2.4927e-28
ARHGAP15	-0.348487	4.39768e-09
2024-03-03	-0.350417	5.97171e-09
CDC14A	-0.35054	8.45779e-12
RPS25	-0.352005	5.42868e-33
RPL38	-0.35363	2.19343e-13
PLCL1	-0.35424	3.53707e-07
HSP90AB1	-0.354365	7.80297e-06
RPL14	-0.355742	5.75512e-30
ITPKB	-0.358026	1.60949e-11
YME1L1	-0.358585	1.29447e-12
RPL37	-0.36073	2.97109e-24
RPL39	-0.361803	9.94737e-26
RGS2	-0.363433	0.0016892
BCL11B	-0.363455	4.8931e-11
RPS4Y1	-0.366195	1.23524e-22
ABLIM1	-0.366486	0.000147382
CRYBG1	-0.368255	7.9701e-11
TUBA1A	-0.36864	4.97832e-09
UBE2S	-0.368967	9.46493e-12
SC5D	-0.369133	7.49626e-07
RPL8	-0.369403	2.69572e-28
SIK3	-0.369877	5.88031e-06
CSKMT	-0.370734	3.78263e-06
RPS28	-0.37296	2.53492e-33
AL118516.1	-0.373558	8.31056e-05
RPL18A	-0.373638	2.21236e-30
HOOK2	-0.375489	8.5197e-09
HNRNPU	-0.375526	7.59774e-16
CENPC	-0.37711	3.96573e-11
ZFAND2A	-0.379301	0.000441394
TXNIP	-0.37961	4.85957e-15
ZBTB10	-0.382852	1.67724e-05
MAML2	-0.387319	3.27845e-08
HERC1	-0.387925	4.3857e-12
HSPA8	-0.389324	6.08911e-05
SNHG5	-0.390005	1.59643e-10
RPS15A	-0.391055	1.2935e-40
HIVEP2	-0.394189	3.8952e-07
ABCC1	-0.394342	2.60088e-08
RPL29	-0.395637	2.07957e-36
ATF7IP	-0.398054	2.43247e-11
AL499604.1	-0.399712	0.0140106
PABPC1	-0.402368	4.80723e-27
ZNF831	-0.404518	8.49576e-09
BTG2	-0.408553	5.57963e-15
RPL21	-0.411846	6.46064e-28
RPS6	-0.412296	1.83303e-30
RPL10	-0.414778	7.71539e-24
RPLP2	-0.414879	1.99719e-33
FOS	-0.418426	6.68704e-09
TSHZ2	-0.419566	0.00027715
RPS8	-0.41966	5.39759e-34
MAL	-0.424624	9.17371e-07
RPS27A	-0.426318	4.75479e-41
IRF2BP2	-0.426492	4.49093e-09
RPS14	-0.426796	2.04405e-36
RPL3	-0.426976	3.54214e-34
DENND4A	-0.429141	9.67494e-09
ELL2	-0.42987	5.318e-12
RPL34	-0.430447	1.05951e-38
RPS27	-0.431534	2.0688e-34
CCNH	-0.432569	9.59113e-17
CITED2	-0.433288	2.20753e-08
NR4A1	-0.434331	4.06905e-07
IFITM1	-0.434857	6.43937e-09
NABP1	-0.43791	1.28466e-06
PER1	-0.439981	1.46603e-14
TCF7	-0.440019	5.61004e-11
RPL19	-0.441223	2.72681e-43
CAMK4	-0.441542	5.23096e-09
RPS3	-0.443675	7.90208e-48
ZNF331	-0.446316	1.79862e-12
BTBD11	-0.447318	2.14675e-08
AC016831.7	-0.454078	2.95039e-08
TSPYL2	-0.454517	9.01226e-14
RPS13	-0.458587	1.075e-47
RNF19A	-0.460435	5.36851e-23
SYNE2	-0.463403	3.00167e-14
SGK1	-0.464402	1.03849e-05
PPP2R5C	-0.468643	1.87406e-17
RBFOX2	-0.470249	0.00215118
HSPA1B	-0.470582	0.000179425
MALAT1	-0.471238	5.64819e-14
DNAJA4	-0.471657	0.00224273
FAAH2	-0.474952	1.67455e-06
TUBA4A	-0.476841	1.09299e-13
RPS23	-0.481416	2.30578e-49
RPL13	-0.484871	1.59407e-47
JUNB	-0.490203	1.09536e-18
APOO	-0.490637	3.05244e-09
RPL11	-0.492259	5.96928e-50
HSPE1	-0.493169	2.10053e-10
RPS18	-0.497328	2.88423e-47
RPS5	-0.502138	7.28051e-43
TMEM131L	-0.503819	1.95887e-14
EML4	-0.514055	5.60698e-24
CNOT6L	-0.517542	6.54743e-17
HSPA1A	-0.518255	0.000783712
RPL32	-0.518616	1.36849e-55
ANKRD12	-0.522759	1.06863e-23
LEF1	-0.536658	4.07401e-11
RPL30	-0.537296	1.89114e-60
RPS3A	-0.542258	1.56246e-47
CD55	-0.548694	1.2097e-16
SLC2A3	-0.557051	5.52629e-19
KLRB1	-0.559761	4.99481e-06
BACH2	-0.584588	2.38349e-08
BICDL1	-0.587282	2.56475e-13
EEF1B2	-0.599342	1.29656e-43
PLAAT4	-0.611823	1.23747e-13
HSPD1	-0.614214	1.81186e-13
PDE3B	-0.621484	4.91816e-16
PTGER4	-0.622572	2.56732e-16
ZFP36L2	-0.622798	1.17169e-24
RPS12	-0.635901	8.6863e-59
TAGAP	-0.65467	4.30216e-18
NR4A2	-0.668184	1.09425e-19
CLEC2B	-0.668361	8.51273e-18
HSP90AA1	-0.718531	1.13536e-11
DNAJB1	-0.725488	3.71029e-09
CCR7	-0.772059	7.88196e-16
CD69	-0.796258	3.50735e-31
KLF2	-0.824442	1.86735e-21
SESN3	-0.844359	8.25965e-31
FP671120.4	-0.967975	2.13998e-08
HSPH1	-1.01034	4.14652e-19
FP236383.3	-1.1411	3.66022e-11
Note: Avg_log2FC>0 genes overexpressed in FOXP3hi Tregs; Avg_log2FC<0 genes overexpressed in FOXP3lo Tregs.

## Sheet: table S7 CD79A- vs. CD79A+ B
table S7. Differentially expressed genes in CD79A- vs. CD79A+ B cells
Gene	Avg_log2FC	Adjusted_pValue
FP671120.4	2.7337	0
FP236383.3	2.68002	5.29086e-291
IGLC2	2.04709	2.79709e-96
MT-ATP8	1.94282	0
NEAT1	1.70316	1.55976e-298
MT-ND4L	1.68909	0
MT-CO1	1.58428	0
TTN	1.58005	7.61196e-228
IGHG1	1.57643	8.98975e-179
MT-CO3	1.45427	2.86219e-231
MT-ND5	1.45084	0
MT-CYB	1.3946	5.04641e-267
MT-ATP6	1.3829	2.31759e-96
MT-ND4	1.37835	3.27356e-234
IGHG3	1.32798	1.76462e-130
AL355075.4	1.26612	5.00727e-122
XIST	1.22624	1.75003e-140
Z93241.1	1.1325	1.94848e-138
MT-ND2	1.1315	9.83236e-237
ANKRD11	1.07151	0
TEX14	1.06664	3.55749e-71
MT-CO2	1.06558	6.70555e-189
GRK5	1.06372	6.59592e-215
PDE4D	1.0587	6.7111e-114
IGLC1	1.05608	6.35462e-73
RGPD2	1.04294	2.36548e-103
TRIO	1.04166	3.57608e-226
ABHD3	1.03818	9.74463e-171
RNF213	1.03293	1.32154e-249
EBF1	1.01833	6.57115e-250
CROCC	1.00843	3.4756e-134
MALAT1	0.986094	2.11806e-138
HSPH1	0.970485	5.23757e-144
RAPGEF1	0.962747	6.89454e-273
LUC7L3	0.954976	4.24708e-292
ARID1B	0.95322	6.40882e-303
MT-ND3	0.948355	4.3314e-121
ATXN1	0.941063	2.33644e-193
TNF	0.937426	1.74433e-195
SLC5A3	0.936962	5.58819e-160
SIK3	0.936725	9.02671e-216
KMT2C	0.934088	5.35035e-289
ELOVL5	0.923055	9.12444e-292
SYNE2	0.912839	1.48368e-197
SMCHD1	0.90918	1.4177e-305
MICAL3	0.907212	3.94302e-261
TSPYL2	0.903912	7.07592e-247
SIPA1L1	0.898106	3.70787e-181
AHNAK	0.881681	7.68352e-169
UTRN	0.880979	1.54721e-231
NKTR	0.87946	3.36207e-258
MACF1	0.86829	5.1834e-207
RERE	0.865842	1.90817e-196
ATRX	0.865147	2.53298e-272
YME1L1	0.858603	6.77623e-286
MGAT5	0.855089	4.85544e-199
RABGAP1L	0.847657	1.39826e-232
MT-ND6	0.840805	5.30761e-130
ANKRD12	0.838976	4.6976e-299
DENND4A	0.831895	6.08703e-189
OGA	0.830718	2.23219e-295
HNRNPU	0.830271	0
SPAG9	0.819484	1.34479e-209
SPEN	0.817512	8.72574e-240
ZHX2	0.812911	3.31705e-195
UBR5	0.808136	1.92097e-240
TCF25	0.807667	7.17796e-282
USP34	0.807574	5.5447e-299
MSI2	0.806141	4.68273e-162
EML4	0.805629	4.12896e-289
ATF7IP	0.802148	2.86263e-206
ZBTB20	0.8015	5.89069e-260
SMAD3	0.798426	4.25066e-206
ITPR1	0.79497	3.81583e-207
FYN	0.79262	3.7917e-145
CMIP	0.790665	1.06506e-148
ZSWIM6	0.790012	5.43465e-187
BCL2	0.784237	5.48455e-274
PPP1R10	0.78297	3.12517e-207
RALGPS2	0.778992	1.2711e-266
ZC3HAV1	0.778981	4.06078e-256
NPIPB5	0.776941	1.82822e-176
CHST11	0.7737	3.98463e-227
NABP1	0.772636	4.36132e-168
FBXW7	0.772398	1.10243e-220
PRDM2	0.769841	6.80203e-307
DYRK1A	0.76846	1.64632e-198
SLC38A2	0.767165	3.92914e-272
AKAP13	0.760943	6.94761e-283
CCL5	0.760701	4.99789e-124
KDM6A	0.759446	2.24958e-168
ASH1L	0.757728	4.84112e-269
HIVEP2	0.756124	4.88604e-199
TRAF1	0.756028	4.34842e-115
JARID2	0.753938	1.89749e-194
MED13L	0.753674	9.6908e-198
AL021155.5	0.753104	4.5388e-131
TUT4	0.75292	5.45049e-266
TRA2B	0.750611	3.43579e-295
AKAP9	0.748426	2.26119e-221
SMG1	0.747603	3.11826e-272
FOXN3	0.744849	8.45498e-235
ZEB1	0.744122	1.18783e-185
DENND3	0.739238	9.15902e-213
PIP4K2A	0.735772	1.62923e-250
AL499604.1	0.735691	1.86053e-160
SLC4A7	0.729957	1.19866e-185
LRRFIP1	0.726314	6.82147e-258
IKZF1	0.720837	2.18577e-256
DNAJB6	0.719109	4.01053e-294
MIR29B2CHG	0.718597	3.09077e-134
KAT6A	0.717699	2.63401e-207
GOLGB1	0.716485	2.72528e-179
BDP1	0.716362	4.03027e-194
ARIH1	0.715013	2.19867e-250
PCSK7	0.714522	4.73122e-161
CHD7	0.714423	2.32977e-241
SETBP1	0.712983	2.06974e-150
ABCC1	0.712133	2.50899e-155
DDX17	0.711893	4.20768e-306
UBE2H	0.711762	2.25677e-269
AFF4	0.710074	2.46797e-232
DNAJA4	0.706819	8.02017e-70
AC016831.5	0.706022	3.11151e-137
AC020916.1	0.7038	4.63167e-140
NSD3	0.699703	4.42648e-287
MYO9B	0.699634	1.00272e-187
BICDL1	0.698055	3.1717e-91
TRAK1	0.69607	5.53732e-157
MAP4K4	0.694966	2.07658e-228
ZEB2	0.694039	7.82457e-157
INPP5D	0.690797	4.76988e-239
BTBD9	0.689852	2.41646e-111
NFAT5	0.689167	2.76114e-220
SNX29	0.687525	2.72843e-154
INTS6	0.687282	4.53389e-194
UST	0.686092	1.17559e-134
TBC1D22A	0.683476	6.28803e-198
BACH2	0.68041	3.16619e-102
USP9X	0.678075	1.7916e-186
AC007384.1	0.67607	7.79748e-235
PPP1R16B	0.675837	3.80202e-173
JMJD1C	0.673305	3.25347e-265
CDC14A	0.67321	5.1003e-114
UPF2	0.672721	1.85469e-215
ARHGAP26	0.668008	9.11637e-101
FNBP1	0.666163	1.57359e-255
ARID4B	0.666102	4.85064e-294
CBLB	0.664232	6.27708e-142
ANKRD33B	0.663602	6.56624e-170
CDK14	0.663449	3.79337e-158
PARP8	0.663314	4.41547e-193
AUTS2	0.662626	3.0865e-84
TBL1X	0.657411	3.83908e-130
IGHA1	0.654547	4.24867e-142
LINC-PINT	0.653232	1.2447e-190
IQSEC1	0.651915	2.6839e-161
MAML2	0.651499	1.59698e-131
LPIN1	0.650407	5.82069e-208
BANK1	0.648231	5.14892e-240
ZFC3H1	0.646107	1.2941e-192
BIRC6	0.644692	3.18252e-189
MBNL1	0.644674	7.6321e-282
ANK3	0.64427	6.07824e-100
ELMO1	0.644077	4.16404e-229
DYNC1H1	0.643517	1.9988e-163
SLC7A5	0.639168	2.79179e-109
ARHGAP15	0.63747	1.23536e-187
Z99127.4	0.635299	4.48993e-126
VPS13C	0.635042	1.95343e-226
EHMT1	0.635009	1.89158e-171
NIPBL	0.633952	4.44863e-219
ARGLU1	0.633925	7.43727e-305
CHORDC1	0.632672	7.29485e-180
PDE7A	0.632539	1.73944e-231
FTX	0.628565	1.86541e-129
GABPB1-AS1	0.628083	3.9363e-140
PAG1	0.626263	7.14379e-171
DGKD	0.626081	1.07006e-157
CNOT6L	0.624924	6.46885e-199
KMT2A	0.624126	4.55377e-285
AC007952.4	0.623495	2.44165e-105
OSBPL10	0.622393	1.2247e-191
HERC1	0.622059	2.56855e-159
MTSS1	0.621805	2.92128e-174
NCOA3	0.621102	2.19239e-255
RICTOR	0.619779	6.60015e-197
PCM1	0.619011	2.98942e-222
RANBP2	0.618583	5.78918e-208
VMP1	0.618118	4.57524e-144
PNISR	0.617913	1.49569e-270
ANKRD36C	0.616397	9.50692e-117
ZNF644	0.614464	1.1292e-204
RHOQ	0.614185	1.18783e-213
RALGAPA1	0.611028	2.23653e-188
PLCG2	0.610628	5.00199e-200
MAPK8IP3	0.610209	7.33963e-138
PRPF4B	0.60923	1.22098e-180
ANKRD44	0.609099	4.42058e-216
CNTRL	0.607601	2.37446e-181
AKT3	0.606674	3.49325e-156
LRBA	0.606484	6.61015e-143
ELL2	0.603899	2.78502e-241
EPS8	0.601823	1.39491e-102
GOLGA4	0.600454	3.26512e-192
RNF19A	0.600444	4.02406e-223
HIPK2	0.598509	2.03996e-146
PRRC2C	0.598366	2.60912e-287
QKI	0.598022	9.21171e-224
TMEM131	0.59688	2.34835e-166
RNF149	0.595613	1.23435e-184
FLNA	0.593794	1.42184e-154
TMEM131L	0.592244	1.69943e-171
PCF11	0.591742	3.09631e-180
HIVEP1	0.591288	3.14828e-201
PRKX	0.590371	1.87832e-166
CAMK1D	0.589596	7.67834e-153
SRPK2	0.588499	1.19137e-207
FBXO11	0.587633	1.86355e-153
USP24	0.586951	1.01601e-158
PCNX1	0.584963	6.33652e-134
ANXA1	0.584938	6.73766e-45
NFKBID	0.584869	2.69782e-167
HSPA4	0.583941	3.59763e-192
IGKC	0.583347	1.45928e-64
CARD11	0.582925	2.74572e-142
ADAM17	0.581738	2.12075e-171
AFF1	0.581609	5.73543e-164
TLE4	0.580812	1.33896e-168
PTK2B	0.580723	1.69953e-144
RIPOR2	0.58002	1.17673e-189
MYCBP2	0.579751	2.81723e-247
ZFAND3	0.579545	1.66499e-160
WAC	0.578096	1.61499e-228
LUZP1	0.578024	9.47855e-103
CDYL	0.576472	9.3682e-128
DLEU2	0.575897	3.43875e-108
PSME4	0.575268	5.60196e-126
RBM6	0.574828	2.66812e-209
RUBCN	0.574335	1.46238e-190
ETV6	0.573331	1.48892e-201
NSF	0.572108	8.24145e-146
PVT1	0.570228	3.86766e-161
SNHG14	0.569991	1.2362e-102
GOLGA8B	0.569341	3.05539e-105
INPP5A	0.568871	2.09916e-145
SNAP23	0.568645	2.43453e-187
USP15	0.568553	1.26055e-249
WDR74	0.568177	1.0806e-219
NFKBIZ	0.567689	3.97188e-194
HSPD1	0.567378	4.36297e-149
RASSF3	0.567279	2.98318e-200
GATAD2A	0.565731	1.82836e-137
MBNL2	0.563918	2.34596e-184
DOCK2	0.563314	9.38049e-164
PRKCE	0.562919	1.69315e-86
ATM	0.562876	5.63621e-195
PBX4	0.56273	2.42781e-125
CCDC88B	0.562093	1.10226e-109
AC025164.1	0.562071	8.50307e-166
HEXIM1	0.561745	1.88834e-130
CHD1	0.561723	8.21872e-252
GNG7	0.561361	2.44055e-253
JAK1	0.561257	5.61454e-303
TOX	0.56091	1.02501e-90
ANKRD28	0.560431	4.88144e-107
STAT4	0.5601	1.63438e-80
NOP58	0.559843	3.30949e-207
CYTOR	0.559759	2.82346e-80
STIP1	0.559042	7.01939e-164
ATXN7	0.558715	1.62949e-124
ITSN2	0.557713	2.12822e-230
ASXL1	0.555236	9.28263e-221
LPP	0.555162	1.06211e-138
EPB41	0.554742	1.52506e-169
PEAK1	0.554234	5.50682e-115
GRK3	0.554194	1.31362e-132
HSPA6	0.554182	3.20675e-20
HECA	0.554101	1.53828e-187
PLEKHG1	0.553283	8.18083e-139
PRRC2B	0.552637	6.30478e-189
UBR4	0.552473	7.99111e-138
TET2	0.552209	7.9346e-126
FNBP4	0.552045	6.47657e-238
ESYT2	0.551261	9.27897e-124
REV3L	0.550742	1.72583e-164
SESN3	0.550523	7.66719e-186
TMEM107	0.550457	1.3927e-109
KLC1	0.548446	2.39106e-126
ERC1	0.54744	1.39722e-111
ZMYM2	0.546299	3.13223e-226
PAFAH1B1	0.544762	9.28788e-229
TGOLN2	0.544206	7.69503e-201
RFX3	0.543751	2.01531e-131
BRD4	0.543595	1.37436e-246
CDK12	0.543413	8.97347e-128
BTAF1	0.542404	7.51848e-134
SREBF2	0.540927	3.11392e-166
MCOLN2	0.540076	5.18448e-105
MEF2A	0.539429	8.98466e-225
STK10	0.539331	6.47196e-126
RUNX1	0.539206	1.23064e-86
AKNA	0.538901	3.77602e-155
ATP13A3	0.53879	8.59353e-118
IRF1	0.538367	8.07643e-177
SMARCA2	0.537701	1.87474e-176
RAB11FIP1	0.537073	1.28331e-232
JAZF1	0.536719	1.78764e-166
SKI	0.535819	5.61885e-114
RAPGEF6	0.535632	1.38163e-143
ARID2	0.535052	3.25299e-166
ADD1	0.534393	1.28958e-212
PPP6R3	0.534069	1.21962e-171
MAP4	0.532322	3.90039e-164
SEMA4D	0.530229	1.6056e-134
KANSL1	0.530129	1.01904e-139
HUWE1	0.529787	2.53736e-175
RUNX3	0.529493	6.29252e-207
DIP2B	0.52688	3.40062e-127
PACS1	0.526263	3.72656e-152
VPS37B	0.525232	8.42539e-178
TBL1XR1	0.522786	1.91206e-158
PHF6	0.522475	8.07186e-145
LYST	0.521503	8.15325e-182
SPTBN1	0.521256	8.71571e-139
TUT7	0.518786	6.54457e-144
TULP4	0.518481	1.75621e-112
USP6NL	0.517786	2.50682e-173
NFKB1	0.517369	6.93895e-163
RAB8B	0.516164	1.42848e-253
CDK13	0.51593	2.91705e-139
TANK	0.515278	1.62167e-265
ABCG1	0.515136	1.71244e-129
BBX	0.514083	2.73508e-220
PREX1	0.512814	1.56309e-145
DOCK11	0.512798	7.576e-124
WNK1	0.512635	1.02963e-192
EIF2AK3	0.512583	4.98325e-150
NLRC5	0.512375	1.19848e-122
CCDC93	0.512156	1.30931e-123
ACAP1	0.511926	9.67811e-236
UBE2E2	0.511038	2.26421e-144
BPTF	0.510803	7.12056e-190
RAPGEF2	0.510727	2.50691e-82
AFF3	0.509881	1.09166e-119
LRMP	0.509398	1.02979e-116
SEPTIN6	0.508502	7.45528e-220
CELF2	0.508343	4.61614e-213
SPTAN1	0.507214	1.4971e-178
SFPQ	0.50709	4.60622e-248
MARK3	0.506681	2.0687e-149
CASP8	0.505063	1.93533e-130
TCF4	0.503121	1.76772e-193
ATP2A3	0.502692	4.69387e-147
CENPC	0.502347	1.13507e-150
STAG1	0.502069	2.27946e-161
MEF2C	0.501709	1.85853e-235
SIPA1L3	0.501019	1.45548e-100
DOCK10	0.50042	4.42602e-140
CCDC88C	0.50019	3.661e-158
SAMD12	0.499129	2.64926e-88
SLC38A1	0.497227	1.19043e-230
USP22	0.497163	7.6768e-184
BOD1L1	0.496959	1.60676e-195
PHIP	0.496878	2.02951e-207
RBM5	0.495434	5.31882e-129
ATP11B	0.494547	1.44123e-129
WDFY4	0.494151	9.05466e-120
XPO1	0.493857	6.38902e-172
CGAS	0.493715	8.34302e-116
USP48	0.492673	5.3902e-145
VAV3	0.492555	2.75819e-98
TTC7A	0.491942	2.91195e-106
AL121944.1	0.491759	1.71513e-141
NUP153	0.491639	2.49785e-135
MIS18BP1	0.491375	3.80571e-177
AC016831.7	0.491087	1.2076e-68
VPS13B	0.490224	1.83763e-98
RC3H1	0.490049	1.25176e-120
TRAF3	0.489885	3.78993e-216
BCLAF1	0.489724	8.77965e-217
ZNF638	0.489508	3.74081e-161
MBP	0.48881	2.52895e-211
WDR26	0.488398	1.5974e-128
SEL1L3	0.488017	4.26764e-174
SON	0.48783	3.03329e-280
ECE1	0.487726	2.79109e-119
FOXP1	0.487027	6.91469e-164
RAB3GAP2	0.486791	6.08962e-152
HSPA1B	0.486667	1.52597e-46
ARHGAP17	0.48655	2.89411e-112
ATP2B1	0.486499	1.20894e-200
CEMIP2	0.485887	7.2321e-116
LRCH3	0.485025	4.40438e-115
IKZF3	0.484656	7.06582e-181
TAOK3	0.484482	6.92804e-130
ZNF292	0.484034	5.79738e-194
RREB1	0.483106	1.26243e-109
KMT2E	0.483075	2.81321e-295
TOP1	0.483033	4.10959e-173
TNRC6A	0.482954	3.15961e-114
NFATC1	0.482308	2.66671e-150
2024-03-06	0.482304	5.21739e-174
PKN2	0.481991	3.5611e-143
DENND5A	0.481819	4.21657e-91
PUM1	0.481391	4.48963e-173
BAZ1A	0.480582	6.19213e-205
TRIM44	0.480278	1.86032e-141
FOXO1	0.478775	3.09181e-140
CSKMT	0.478061	1.16041e-112
CLK1	0.477432	2.4048e-198
RSRC1	0.477341	2.17665e-99
OTULIN	0.476451	2.0398e-114
DHX36	0.474783	3.33023e-178
PPP2R5C	0.474654	1.8944e-233
MAN2A1	0.47435	8.6252e-154
GSK3B	0.474316	4.22623e-123
NDRG1	0.472947	9.2638e-99
KDM4C	0.472903	2.97372e-138
ANKHD1	0.4727	9.25113e-175
SGMS1	0.472616	2.16493e-97
AC120193.1	0.472603	4.00667e-125
NCOR2	0.472263	3.77851e-104
CD44	0.471576	7.07666e-219
RELT	0.47111	1.8256e-123
SAFB2	0.471104	7.59416e-156
ZNF791	0.470658	2.65917e-133
ARAP2	0.469567	1.06291e-124
CYLD	0.469241	1.14647e-203
ANKRD36	0.468852	2.77683e-84
MXD1	0.468627	6.35482e-84
ZDHHC20	0.468409	6.84406e-125
MED13	0.468253	2.34668e-144
EPM2AIP1	0.467873	3.61916e-112
GPCPD1	0.467601	8.46244e-173
HDAC9	0.466358	6.25708e-91
MCTP2	0.465569	3.9214e-73
ILF3	0.465556	9.57858e-188
TMC8	0.465233	1.84307e-132
EZH2	0.464708	2.01172e-93
NPEPPS	0.464592	8.39946e-154
KDM2B	0.464291	1.55443e-138
SPIDR	0.464038	1.18963e-92
PPP1R15B	0.463934	8.03241e-175
LENG8	0.463612	7.62344e-144
PAXBP1	0.462965	6.10703e-106
LRCH1	0.461851	4.57473e-121
SRSF10	0.461276	5.45055e-227
IQGAP2	0.46052	1.28712e-60
RASGRP1	0.460359	3.06631e-123
ARID5B	0.460188	7.15453e-210
RABGEF1	0.459961	7.52199e-107
TRIP12	0.458436	2.01268e-136
TBC1D5	0.458333	3.13508e-146
AC093010.2	0.458024	1.49343e-93
FUS	0.457759	1.34943e-262
KDM4B	0.457674	5.93681e-144
OGT	0.457607	3.96825e-173
DOCK8	0.457343	5.47665e-160
DDX39B	0.457273	4.65022e-205
SUGP2	0.456971	4.47357e-107
FCHSD2	0.456449	6.87769e-157
TNFAIP8	0.456409	2.99959e-241
CCSER1	0.455958	2.68688e-69
PIK3CA	0.455783	7.80665e-143
SPPL3	0.455516	5.91301e-111
EXOC4	0.454688	1.24839e-93
FRYL	0.453029	7.30098e-143
SNHG5	0.452719	5.8514e-193
KPNA1	0.451306	7.27453e-140
KLF12	0.450008	1.06784e-109
LPCAT1	0.449996	1.98794e-144
SQSTM1	0.449443	4.5207e-253
EPS15	0.449337	1.33767e-190
AC245297.3	0.449272	2.84213e-138
ADAM28	0.448876	3.09182e-205
SETD2	0.448459	1.5463e-141
SETX	0.448089	1.34956e-155
CIITA	0.447985	7.29322e-98
NFATC2	0.447779	6.60791e-100
MOB3A	0.445896	1.15391e-171
ERO1B	0.443734	7.07736e-120
ALCAM	0.442935	2.78865e-97
REL	0.442474	1.47131e-170
CFLAR	0.44111	9.5519e-201
CDC42SE2	0.441052	2.49385e-278
ATAD2B	0.440703	5.91773e-117
IFFO2	0.440508	9.11403e-97
PHC3	0.440147	4.77403e-129
MIR155HG	0.439985	6.47598e-105
LARP4B	0.439644	1.44936e-114
OSBPL3	0.439096	4.26992e-103
ARHGEF7	0.438326	4.37132e-83
MYH9	0.438206	2.33665e-176
LINC00910	0.437817	2.03904e-62
SAMD8	0.437694	2.38737e-118
IMMP2L	0.437378	2.26482e-82
POU2F1	0.4373	6.16889e-89
ENTPD4	0.437297	3.25016e-128
NEK7	0.437115	1.75071e-121
AGO2	0.43694	4.95957e-157
POLR2A	0.436861	1.07855e-156
ARID1A	0.436748	5.81614e-107
TAF1D	0.436745	2.17334e-222
PJA2	0.436627	1.44549e-182
CEP85L	0.436228	4.39448e-98
MRTFA	0.435469	1.91886e-80
BIRC3	0.435127	9.82276e-145
GATAD2B	0.434175	5.4317e-122
RHBDD1	0.433469	9.85087e-91
RSBN1L	0.433444	3.50064e-156
RBM33	0.43299	9.8529e-151
PPP4R3A	0.432795	5.55856e-194
FLI1	0.432777	1.19328e-161
ARHGAP24	0.432681	1.26073e-197
ASAP1	0.432604	1.60566e-117
SH3KBP1	0.432435	2.37929e-178
SMARCC1	0.43207	6.51511e-147
FNIP1	0.431086	1.42998e-161
ADD3	0.430484	7.27354e-130
USP8	0.43018	5.06193e-140
AHCTF1	0.42995	8.98972e-111
ACSL1	0.428739	4.28908e-110
FAM214A	0.428491	2.96436e-116
DDX3X	0.428379	1.79471e-234
PRKCB	0.428143	8.57393e-198
SLC23A2	0.427875	6.14332e-111
ATP1A1	0.427861	3.26969e-165
IGHG2	0.42764	4.2681e-82
CDK17	0.426853	2.85545e-125
AC087239.1	0.425826	9.5096e-113
CCL4	0.425774	2.16075e-92
SLC25A37	0.425754	9.89199e-128
HP1BP3	0.425711	3.50615e-193
FBXO34	0.425611	8.02635e-115
NIN	0.425451	1.49368e-204
ATP6V0A1	0.42531	1.94734e-87
PIK3R1	0.425091	3.38474e-104
FBXW11	0.424997	7.70463e-168
ATG2A	0.424664	3.56534e-108
NCOA2	0.424442	2.19089e-96
FAM172A	0.424278	2.16689e-82
KIAA1109	0.42397	4.28171e-102
GAK	0.422971	8.48815e-94
SIN3A	0.422381	2.35045e-128
MECP2	0.422336	1.08765e-191
INPP5F	0.422256	9.40449e-91
FAM49A	0.420622	4.45722e-223
KAT6B	0.420268	4.28181e-117
MAPK8	0.420161	5.07729e-114
HNRNPH1	0.419535	1.74941e-179
AC253572.2	0.418113	2.33369e-79
ZNF207	0.418085	1.53309e-209
TRPM7	0.417711	1.50702e-140
AFDN	0.417359	1.28036e-112
IGF2R	0.417299	1.12053e-73
DMXL1	0.41702	2.72016e-147
SMYD3	0.416425	1.5886e-78
ERICH1	0.416386	1.64436e-121
USP36	0.415717	2.79932e-114
STX16	0.415663	3.39087e-123
RCOR1	0.415375	1.046e-120
ELMSAN1	0.414811	1.22747e-130
YTHDC1	0.413994	1.68622e-181
KYNU	0.413574	1.4818e-173
NUP98	0.413293	4.09311e-153
SCAF11	0.412916	2.49937e-216
MBTPS1	0.412801	3.30709e-83
LUC7L	0.412581	3.0268e-150
SRGAP2	0.411868	6.37971e-103
AHI1	0.410823	3.34853e-106
POLR2J3	0.41081	1.60804e-105
ARHGAP45	0.410712	5.61333e-131
FKBP5	0.410609	1.84546e-99
HTT	0.41058	5.99643e-89
BORCS5	0.410164	1.40912e-98
ZRANB2	0.407851	3.99337e-162
NF1	0.406762	6.07269e-90
TENT4A	0.406695	5.70413e-77
AZIN1	0.405903	2.79502e-157
CHD9	0.405396	1.60402e-133
STK4	0.405195	4.77292e-250
TBC1D9	0.403288	1.64594e-89
CHD6	0.402681	1.34719e-93
SNX25	0.402124	1.8391e-146
PPFIBP2	0.40192	1.32105e-98
RORA	0.401918	7.75391e-103
SPG7	0.401543	3.15889e-98
SETDB2	0.400244	1.53981e-93
P4HA1	0.399994	5.16297e-108
BRWD1	0.399577	7.90157e-138
THOC2	0.399412	1.06127e-165
ILF3-DT	0.399123	3.19719e-111
NAP1L4	0.398873	1.25264e-172
SAMSN1	0.398335	3.21285e-182
TASOR2	0.398262	5.22807e-111
VPS13A	0.397805	1.04741e-109
EPB41L2	0.397746	4.10255e-91
CCNL1	0.39751	4.62369e-264
SRSF1	0.397451	1.38239e-136
ITPKB	0.397112	2.07656e-118
DIAPH1	0.397013	1.99281e-132
SLC39A10	0.396659	2.11487e-119
PPTC7	0.395508	1.5361e-154
SOS1	0.395396	6.49101e-85
ADAM19	0.394598	6.40411e-96
DDX21	0.394514	4.20107e-217
BMP2K	0.394509	6.12635e-101
PPP3CA	0.39439	9.82382e-154
PUM2	0.393756	4.49736e-126
SSBP2	0.393403	7.57442e-90
USP3	0.392743	5.41508e-195
PDS5B	0.392385	2.6646e-101
SLC20A1	0.392341	1.51851e-120
PAN3	0.391966	5.45792e-121
FOXK1	0.391847	7.5333e-98
PTPN1	0.391751	3.39882e-186
FOXO3	0.391133	1.47625e-76
TRAPPC9	0.390789	7.20516e-70
KDM5A	0.390667	2.19215e-114
GCC2	0.390629	1.82882e-184
ZBTB1	0.390508	9.19353e-130
BRD2	0.390043	3.40064e-203
UBR1	0.389085	1.08651e-75
KIAA0232	0.388825	2.40936e-94
CEP350	0.388626	2.41403e-111
ZCCHC7	0.38862	2.19281e-133
ZBTB10	0.387914	2.01458e-159
BRAF	0.387618	8.71239e-180
STIM2	0.387204	4.01959e-151
NGLY1	0.386525	6.09422e-146
TESK2	0.385751	1.34297e-101
RLIM	0.385391	1.92607e-102
RNF38	0.384831	5.6367e-111
RAP1B	0.384422	3.02458e-279
LYN	0.38294	2.09111e-214
CELF1	0.382782	5.7649e-120
HIST1H1E	0.382506	6.69474e-80
HIPK1	0.382444	1.06799e-97
CCSER2	0.382382	2.45456e-118
NUMB	0.382258	8.78637e-117
SERPINB9	0.382138	1.72745e-167
IER5	0.381946	6.43785e-145
CRYBG1	0.381629	5.24117e-142
STAT5B	0.381262	1.91734e-86
USP47	0.380332	4.76405e-129
ATP8A1	0.37999	1.7299e-77
MKLN1	0.379765	1.96212e-95
SLFN11	0.379621	2.64487e-103
RIF1	0.378117	1.03526e-73
ANKLE2	0.377968	4.24065e-134
LCOR	0.37771	8.50382e-94
FARP2	0.377327	1.41947e-116
MTCH1	0.377154	1.83803e-170
KIAA2026	0.377145	2.53747e-99
MDN1	0.377019	2.37178e-75
UVRAG	0.376534	3.60049e-224
MORF4L2	0.376452	3.93179e-154
SYTL3	0.375781	4.5591e-100
MAP3K1	0.375758	1.95716e-148
UBA6	0.375596	2.93033e-118
MAPK1	0.375579	2.45798e-101
TNFAIP3	0.374462	2.73788e-161
STK24	0.374366	2.11976e-175
FNDC3A	0.37436	1.9172e-92
POGZ	0.37392	2.60506e-102
GTPBP1	0.373711	5.20358e-89
RPS6KA5	0.373478	1.69755e-111
HIST1H1D	0.37345	4.72897e-68
SNX9	0.372941	5.17607e-155
MPHOSPH8	0.37251	3.13563e-172
PAX5	0.372477	3.18158e-113
ATP2B1-AS1	0.371757	2.00756e-149
ARHGEF2	0.371731	5.95624e-99
KDM2A	0.371636	6.26244e-143
CCNL2	0.371527	8.03823e-97
CDK11A	0.371522	2.71493e-84
DLGAP4	0.371499	3.89316e-135
ATF6	0.371474	2.72041e-119
GTF2I	0.37141	1.25252e-117
IQGAP1	0.37083	3.47173e-232
STAT6	0.370794	9.96511e-120
PARP15	0.370658	4.16164e-167
RASA3	0.369967	3.16313e-71
CREBRF	0.369878	4.15836e-153
PICALM	0.369679	1.28413e-116
STX12	0.369621	5.04052e-141
ACTN4	0.369382	3.91758e-126
CNOT4	0.369339	3.52371e-149
IFI16	0.36902	3.84496e-195
CNOT1	0.368921	6.1996e-134
TRA2A	0.368587	2.12571e-217
NDE1	0.367755	4.25829e-157
WSB1	0.367413	5.36566e-222
GSE1	0.367229	2.15228e-93
CSNK1D	0.365986	9.94255e-177
HNRNPA2B1	0.365828	1.26453e-239
ATP2C1	0.365742	1.4619e-83
SAFB	0.365681	1.07093e-140
TSC22D2	0.365672	1.1097e-131
OFD1	0.365147	9.49635e-146
MPRIP	0.365075	1.67571e-90
TRPC4AP	0.364977	4.17495e-82
CUX1	0.364521	2.32172e-85
LARP1	0.364311	5.55299e-128
N4BP2L2	0.364072	5.36773e-232
ADK	0.363995	1.58894e-141
TAF4B	0.363723	2.34087e-89
RESF1	0.363704	1.89327e-190
ERBIN	0.363577	1.4856e-97
PHF21A	0.362904	1.00546e-76
FMNL1	0.362612	3.94614e-195
COP1	0.362261	3.94591e-91
PTPRC	0.361384	1.64524e-218
ANTXR2	0.360892	5.07649e-88
TFRC	0.360766	5.73028e-149
RB1	0.36048	3.9145e-139
RLF	0.360166	6.28255e-150
RHBDF2	0.359569	6.87137e-140
STAT3	0.359023	1.31915e-201
TMEM259	0.358113	2.38944e-183
AFTPH	0.357757	4.03341e-183
CLASP2	0.357577	1.47684e-96
KTN1	0.357323	7.64789e-219
KDM6B	0.357025	4.21743e-187
COQ7	0.356909	7.90281e-95
ENTPD1	0.356523	5.91443e-95
PLEKHA2	0.356475	1.68411e-122
KLHL18	0.356206	2.09773e-95
ATXN2	0.356201	2.14018e-100
CSNK1G3	0.356109	6.31229e-165
ROCK1	0.355499	1.62782e-185
TNKS	0.355377	2.26463e-82
PIKFYVE	0.355143	6.87207e-173
DNAJC1	0.355108	1.784e-109
PIAS1	0.354669	1.85966e-149
PRKD3	0.354141	3.09165e-149
PLEC	0.353585	2.50595e-79
AP1S3	0.353415	2.14753e-137
ST8SIA4	0.353028	4.07564e-145
TLK2	0.352972	7.4685e-129
LINC01138	0.352902	1.76412e-137
USP12	0.352772	1.57308e-181
KLHL6	0.352723	2.73628e-138
CDKAL1	0.351115	2.75399e-72
SSH2	0.350989	3.04961e-153
ABI1	0.350882	4.16907e-180
CEP170	0.349814	1.93953e-133
GGA2	0.349516	1.75658e-171
CMSS1	0.34886	1.74199e-58
AC004687.1	0.348529	6.637e-126
PHKB	0.348385	7.45035e-85
TRIM26	0.348118	7.37321e-117
ARFGEF1	0.347976	2.73551e-97
SESTD1	0.346981	2.49531e-103
MPP6	0.346963	5.40317e-78
MAN1A1	0.346399	5.29138e-66
ITPR2	0.346192	1.25367e-88
MDM2	0.34558	1.30963e-85
NR3C1	0.344959	3.8467e-172
NCOR1	0.344814	1.00508e-180
KLF7	0.344618	3.52191e-109
KBTBD8	0.344553	8.59282e-136
TGFBR2	0.344126	3.3049e-128
NARF	0.342867	4.96833e-91
ANKRD17	0.342301	6.73594e-91
RNF168	0.341531	8.39231e-100
2024-03-08	0.341138	1.39411e-92
PDE8A	0.340618	6.11131e-89
RB1CC1	0.338101	5.22505e-88
AC245014.3	0.337945	1.4011e-72
BAZ1B	0.337163	3.83348e-105
TIAM2	0.337073	1.96497e-75
2024-03-01	0.337035	9.12164e-155
CUL3	0.336846	6.84585e-181
DIAPH2	0.33681	2.4727e-92
DDHD1	0.336252	2.93662e-103
SNX13	0.336026	1.66091e-90
MLLT6	0.335723	1.64922e-100
ARHGAP5	0.335616	4.11388e-87
USP10	0.335452	1.81419e-139
HMBOX1	0.33472	1.0333e-77
PDS5A	0.334513	1.02531e-138
PLCL2	0.334309	7.31429e-102
USP9Y	0.334173	9.2189e-107
CWF19L2	0.333972	4.20813e-96
EHBP1L1	0.333577	1.61639e-104
ARFGEF2	0.333461	1.01306e-82
NFKB2	0.333394	1.18718e-214
SLC9A7	0.333365	1.14053e-74
HERC4	0.333185	4.59438e-100
MDM4	0.332673	5.52181e-172
BANP	0.332354	8.34783e-96
WDFY2	0.332338	5.37654e-78
EIF4G3	0.331555	5.28635e-128
HNRNPM	0.331112	5.20739e-175
RNF216	0.330908	2.88176e-100
SFMBT1	0.33002	1.55174e-90
SUN1	0.329836	6.00624e-109
PELI1	0.329702	2.18648e-152
ACIN1	0.329578	2.39286e-129
MON2	0.329385	1.97e-82
RTN4	0.329054	5.14288e-181
DHX9	0.32801	2.62381e-139
ATF3	0.327517	4.6192e-99
STAG2	0.326665	7.31752e-164
AKAP11	0.32653	4.26176e-113
BAG3	0.326238	3.23019e-19
POLR2B	0.326105	1.31407e-102
ZBTB11	0.325834	1.05791e-106
SPATS2	0.3257	1.07931e-86
GLG1	0.32567	4.35575e-94
TRIM33	0.325446	1.00534e-101
CCDC186	0.325375	9.82383e-87
NPAT	0.325315	1.92668e-122
FGD2	0.325088	2.49912e-132
CSNK1A1	0.324824	1.13194e-193
AC103591.3	0.323731	8.96047e-49
CERT1	0.323711	8.89231e-86
AP1G1	0.32349	3.758e-110
HNRNPUL1	0.322794	6.35524e-165
SCAPER	0.322499	2.2952e-92
EIF4E	0.322367	2.4376e-189
RPS6KA3	0.321963	1.73939e-93
SUSD6	0.320006	8.74555e-97
YWHAG	0.319957	1.64753e-102
CCDC91	0.319713	7.58477e-135
LMBR1	0.319384	6.9582e-86
UBR2	0.319354	1.27922e-134
RASA2	0.319354	6.85107e-113
MTR	0.319332	1.01448e-91
COBLL1	0.319111	4.65652e-192
CHD4	0.3185	8.06985e-161
SNRNP200	0.317523	1.26132e-124
EP300	0.317324	2.0975e-104
JAK3	0.316937	2.8283e-118
FUT8	0.31691	7.76748e-74
LPXN	0.315535	1.44906e-163
RNF145	0.315318	1.3541e-125
CREBZF	0.315102	1.27689e-133
RUBCNL	0.314382	8.36514e-126
RUFY3	0.313942	3.67263e-76
MAT2A	0.313431	1.03126e-112
ILRUN	0.313424	2.86358e-109
SRPK1	0.311768	1.67273e-136
SNED1	0.311609	8.60639e-74
NFATC3	0.311109	2.56468e-76
GNB1	0.311102	1.62886e-192
DNAJC10	0.311066	5.39419e-145
OSBPL8	0.311062	2.00351e-127
OGDH	0.310219	4.07185e-74
HELZ	0.310064	7.12187e-103
AP2B1	0.309922	4.0019e-87
ZBTB21	0.309616	1.97847e-104
DAAM1	0.309233	3.10614e-88
PIK3R5	0.30849	1.74432e-77
PTAR1	0.308208	1.28601e-65
GALNT2	0.308052	7.82442e-58
TRAPPC10	0.307902	2.736e-132
CTNNB1	0.307467	1.14874e-198
SETD5	0.306753	5.13554e-161
OXSR1	0.306637	6.61806e-87
UBE2E1	0.306566	1.84041e-133
ZNFX1	0.306507	1.4476e-93
SRSF7	0.306462	1.6018e-215
MCL1	0.305605	2.02171e-165
PANK2	0.304675	6.05149e-96
ITCH	0.304595	3.26515e-100
TCF12	0.304525	3.79565e-114
USP7	0.304471	6.05994e-113
TECR	0.304351	6.03742e-107
SREBF2-AS1	0.303597	1.08123e-76
CCNY	0.30329	5.46613e-116
ZCCHC2	0.302911	5.253e-96
PSMA3-AS1	0.302838	1.7472e-76
SCAF4	0.302691	1.49079e-100
RIC1	0.30251	1.3086e-93
KDM5B	0.3015	3.82975e-93
ZNF106	0.300891	6.80474e-101
ADAR	0.30076	5.76982e-128
RSF1	0.300127	5.19279e-180
DNMT1	0.299992	3.18594e-86
USPL1	0.299599	8.20812e-124
EIF4A3	0.298336	1.718e-160
HCG18	0.298279	1.11111e-73
TPP2	0.298228	1.41662e-72
HIST1H4C	0.298167	2.32526e-151
CAMK2D	0.297645	6.90391e-63
SUCO	0.296458	6.28823e-96
TOP2B	0.296054	1.68118e-90
FOXJ3	0.295781	5.35796e-82
LPIN2	0.295462	5.94901e-75
COG5	0.294727	1.31354e-75
PHF12	0.294648	6.21159e-80
MAPRE2	0.294615	1.81129e-146
DLG1	0.294596	3.35194e-91
NCK2	0.293959	1.90244e-123
TTC3	0.293224	8.1367e-139
TPD52	0.293065	8.03566e-160
GABPB1-IT1	0.293045	2.09563e-117
STK38	0.292873	2.31501e-65
GRIPAP1	0.292279	1.94888e-86
ODF2L	0.292154	3.76394e-84
FAM13B	0.291794	8.97627e-102
PTPN22	0.29153	2.21e-91
RNPC3	0.291292	9.08481e-77
PTBP2	0.290668	1.61389e-72
DENND5B	0.290642	3.57621e-91
IRF3	0.290596	2.48145e-91
CASC3	0.290235	1.26849e-72
ZC3H12A	0.290053	1.83554e-125
SP3	0.28993	2.70604e-120
STRBP	0.289765	1.64482e-141
IST1	0.289616	4.40201e-168
MALT1	0.2896	8.51727e-139
ATXN7L3B	0.288954	6.64276e-94
JADE2	0.288517	5.93047e-107
TAF7	0.288077	2.52346e-207
HBP1	0.287934	1.31861e-186
MOB4	0.287629	4.92858e-114
CAST	0.287528	1.34685e-198
IRAK2	0.28749	5.21782e-84
LEMD3	0.287383	7.60947e-89
XPO6	0.286658	4.33368e-77
MYO1D	0.286472	7.65866e-70
PSPC1	0.286135	1.52762e-80
SNRNP70	0.286053	1.89182e-206
ARID4A	0.285457	9.03392e-116
DNM2	0.285148	1.77643e-95
ETS1	0.284303	1.10661e-110
TARSL2	0.284202	1.02798e-74
UBAC2	0.284068	2.22544e-129
ZNF141	0.283876	1.3335e-102
MYO1E	0.283704	5.86936e-45
UHRF2	0.283702	6.17983e-96
MAPKAPK2	0.283617	4.54222e-118
CREB1	0.282633	1.45606e-134
TAF3	0.282304	8.50515e-90
PACSIN2	0.282266	1.7933e-65
ABHD5	0.282056	2.14563e-83
XPR1	0.281736	2.92428e-71
CREBBP	0.281171	1.51239e-101
PHF20	0.280675	1.34288e-233
EMB	0.280497	3.31577e-119
ZDHHC21	0.280312	2.05391e-74
EDEM1	0.280225	7.03239e-124
VPS36	0.280115	7.46639e-88
NUP88	0.280064	1.43819e-95
STX7	0.279294	1.12599e-127
CDK5RAP3	0.279246	1.71875e-120
CCDC50	0.279116	2.51972e-203
THUMPD3-AS1	0.278631	5.98549e-94
VTI1A	0.278321	2.03474e-76
PAWR	0.276692	3.4646e-129
RNF111	0.276375	7.62417e-89
CTDSPL2	0.274994	1.63149e-80
ATL2	0.274906	1.68325e-73
KDM7A	0.274416	1.19938e-86
HDAC7	0.274332	1.56864e-81
CCDC6	0.274293	7.30015e-120
RFC1	0.274281	8.81221e-100
YY1	0.274011	3.59609e-191
STK40	0.273969	7.19733e-82
GAB2	0.273562	5.36811e-65
AGO3	0.272887	6.19924e-80
HSPB1	0.272792	2.04464e-53
BACH1	0.272611	1.06551e-198
DDX39A	0.271981	7.11532e-120
ZNF217	0.271947	4.9443e-102
KCNN4	0.271565	1.94234e-95
SOCS4	0.271533	3.36772e-75
NUP210	0.270395	1.82913e-96
PTK2	0.269958	1.17964e-102
IGLV1-51	0.26983	4.02671e-17
LY75	0.269778	2.78191e-70
PRKD2	0.269694	1.91472e-94
TAB2	0.269653	1.5537e-110
REV1	0.269501	5.34368e-89
DCAF5	0.269468	5.41207e-89
SYNRG	0.269395	1.97386e-108
EEA1	0.269293	7.08575e-93
PPP2R2A	0.269263	9.71869e-154
CLN8	0.269102	5.97892e-67
TNPO3	0.268713	8.76973e-76
UBXN7	0.268499	2.91527e-94
ARID3A	0.268462	2.09576e-88
SLC12A6	0.268459	1.65132e-68
ADGRE5	0.268261	3.60718e-131
PTPN2	0.268052	6.71476e-160
DNAJB1	0.267786	9.30212e-39
MBD4	0.267579	1.04133e-156
ZFAND2A	0.266998	4.12921e-68
CBL	0.266984	3.04207e-99
SPOPL	0.26674	1.67822e-98
HIP1R	0.26636	1.98104e-75
ERGIC1	0.266151	9.93984e-170
PTPRA	0.265729	2.41774e-80
FAM133B	0.265596	8.35084e-111
MFN1	0.265473	9.72503e-63
TXNDC11	0.265453	1.00856e-85
BLK	0.265367	9.28051e-167
SLC2A3	0.265055	6.00251e-179
ZFR	0.264922	8.80197e-129
ZNF131	0.264907	1.94687e-74
SMC5	0.264653	3.79457e-142
JOSD1	0.264468	2.79414e-163
RBPJ	0.264195	3.4269e-93
ZC3H7A	0.263587	6.98303e-143
AC022217.3	0.263414	2.16085e-64
RNMT	0.262874	1.86546e-143
ZBTB43	0.262645	3.05495e-72
PSIP1	0.262351	3.85751e-158
UBL3	0.262187	2.3416e-110
CDC37	0.261888	2.49014e-197
SHOC2	0.261755	1.07427e-175
ST6GAL1	0.261629	9.19541e-163
PALM2-AKAP2	0.261604	1.01069e-121
PIK3C2A	0.261322	1.88396e-74
ZNF506	0.261207	6.26711e-110
RAB30	0.261032	3.73917e-157
MRPS6	0.260747	1.57619e-147
SMAD7	0.260581	8.84285e-78
AP3B1	0.260072	7.39545e-80
FXR1	0.259639	8.17683e-208
CASK	0.259262	3.63087e-60
MAP3K2	0.259177	6.1244e-149
RSRC2	0.259031	2.12424e-201
PPM1K	0.258759	2.65565e-121
XRN1	0.258666	4.42848e-135
FKBP4	0.257736	6.08858e-123
USP37	0.257669	4.56425e-76
SKIL	0.257053	3.43699e-184
ELF2	0.256418	4.35846e-113
PDXDC1	0.256409	3.07856e-89
UBAP1	0.256294	2.08265e-85
SMAD4	0.256126	6.22171e-87
NOTCH2	0.255595	2.96068e-64
TRIM38	0.25557	2.64832e-130
RABEP1	0.25551	5.78533e-131
SLC25A25	0.255509	4.41507e-102
SLC49A4	0.255099	4.77704e-73
SGPP1	0.254984	6.10216e-92
SYNJ2	0.254904	1.1331e-57
VHL	0.253516	9.01027e-84
ASCC3	0.253147	9.33678e-69
NCKAP1L	0.2529	6.95798e-109
GLUD1	0.252767	7.90934e-86
PDK3	0.252597	1.01186e-82
PPM1B	0.252118	7.34671e-117
ITGA4	0.252012	1.02463e-124
PLEKHM2	0.251989	1.49091e-99
WASHC4	0.251455	6.23029e-115
POC1B	0.251301	6.59895e-99
TACC1	0.251249	1.65384e-139
LCORL	0.251183	3.3935e-90
RBM26	0.251065	6.51835e-148
CBX4	0.250687	2.39774e-74
KLHL24	0.250453	3.20372e-192
PRKDC	0.250305	8.6851e-101
SBNO1	0.250228	1.65967e-119
JUN	0.250195	2.22522e-89
BCL11A	0.250047	2.42982e-172
SP140L	0.250033	1.64286e-114
SP140	0.249443	1.23868e-185
LINC00513	0.249355	3.38397e-89
SEMA7A	0.249349	1.34487e-81
NRDC	0.249087	4.60401e-115
OTUD4	0.248982	2.22806e-77
C16orf72	0.248539	8.29252e-92
SLC7A1	0.248365	2.21061e-76
MARF1	0.247216	5.18682e-83
ZFAND6	0.246594	1.69415e-206
MAP2K1	0.246524	1.20362e-77
SCLT1	0.246326	4.53214e-59
RASSF5	0.246221	1.05925e-123
XPC	0.246124	1.29112e-67
CD2AP	0.246022	4.99334e-110
DIDO1	0.245177	5.30951e-71
RASSF2	0.245102	7.93543e-131
MAX	0.244883	5.09259e-174
NLRP1	0.244881	1.60589e-84
SPG11	0.244733	2.45304e-77
GSAP	0.244691	5.69137e-58
FAM53C	0.244621	7.75876e-70
ERCC1	0.244614	7.96293e-100
DMTF1	0.243734	1.4942e-90
MAFG	0.243492	6.27466e-103
UBE2Q2	0.242538	2.17692e-80
AC243960.1	0.242401	2.49732e-78
LONP2	0.242262	6.91954e-69
GPBP1L1	0.242193	6.02022e-100
TNKS2	0.24201	3.09591e-116
PPHLN1	0.241749	8.42803e-123
DDX46	0.241638	1.97175e-141
RANBP9	0.24158	3.28015e-62
YTHDC2	0.241388	1.04732e-83
RTF1	0.241338	1.08517e-81
ELK4	0.241214	1.30807e-101
PBRM1	0.240883	7.70903e-96
LFNG	0.240685	7.38523e-66
CWC25	0.240591	3.11749e-77
GFPT1	0.240473	2.03378e-64
ZDBF2	0.240382	4.46623e-61
COPA	0.23962	1.26058e-139
ANKRD13A	0.239408	2.54964e-205
RYBP	0.239237	2.79708e-90
DNM1L	0.23873	7.71967e-80
RFTN1	0.23686	3.15943e-117
CSNK1G2	0.236757	2.36844e-142
LNPEP	0.23659	3.10357e-113
NAA15	0.236	1.6755e-93
RBM25	0.235602	1.23851e-205
RGS1	0.235338	1.46291e-50
PPP1R12A	0.235026	5.41029e-133
CD58	0.234398	3.61692e-103
PREPL	0.234359	9.4947e-63
PCGF5	0.234194	1.24816e-150
SCFD1	0.234024	4.8513e-83
WDR82	0.233896	1.47368e-88
CDK19	0.233185	8.71026e-73
BABAM2	0.232702	2.76177e-86
TTC14	0.232459	3.80058e-88
GNA13	0.232367	6.39804e-138
P2RY8	0.23201	6.98248e-61
TNIP1	0.231902	3.32961e-141
TUBA1C	0.231794	2.40896e-126
NASP	0.231477	9.42202e-161
CYSLTR1	0.231088	1.88364e-100
TOB2	0.231008	1.66043e-99
TTC17	0.230624	1.52358e-89
SERTAD2	0.230528	1.10431e-144
DGKA	0.230415	1.85013e-80
PER1	0.229897	1.58404e-124
AGFG1	0.22986	2.95758e-89
KLF13	0.229649	2.75659e-130
SMC6	0.22929	7.84432e-115
IGLC3	0.229209	2.07785e-25
KPNA6	0.22881	3.6704e-68
RSRP1	0.228781	5.56556e-231
ARHGAP30	0.228334	5.5569e-94
VOPP1	0.227611	1.59133e-143
NMT1	0.227105	8.64977e-90
PPM1A	0.22696	7.62202e-93
MFSD14C	0.226874	9.08598e-82
SLTM	0.226353	3.46305e-129
RALGDS	0.226068	8.44848e-88
NORAD	0.2259	1.95232e-108
CDS2	0.225793	8.4739e-104
ZFP91	0.225723	1.18512e-102
OSBPL9	0.225503	5.08709e-85
RAF1	0.224888	9.55764e-71
KPNB1	0.22436	9.49e-144
TMPO	0.223929	4.86793e-132
ARRDC3	0.223589	2.73007e-50
CDK11B	0.223432	7.81965e-81
DYM	0.2232	1.0937e-88
EIF3J	0.223171	6.17735e-73
DCP2	0.222204	8.78697e-126
CBWD5	0.22218	1.51852e-127
IWS1	0.221787	3.73022e-82
RAB3GAP1	0.22171	3.03042e-111
MED15	0.221221	3.62144e-71
RAB31	0.220368	2.7162e-128
LINC01619	0.220297	1.32448e-54
2024-03-07	0.220144	4.32606e-135
SUPT5H	0.219292	9.28938e-107
CNST	0.219108	5.50494e-88
TOPORS	0.218647	2.80326e-81
NFX1	0.21864	6.88214e-97
EFR3A	0.218118	9.45221e-90
MACO1	0.217917	2.3876e-79
CRK	0.217655	2.29709e-73
ZMIZ2	0.217575	2.7546e-76
TRIM8	0.217436	2.45561e-76
ADAM10	0.217145	2.05338e-66
BCL6	0.216738	2.07382e-73
ALOX5	0.21637	1.21846e-78
PFKFB3	0.216188	8.95941e-51
BAZ2A	0.216059	2.67327e-132
PHF20L1	0.215209	3.0168e-59
MTMR6	0.214269	2.40211e-110
GPR132	0.214071	8.54276e-83
ZNF800	0.213668	5.14329e-95
FAM120A	0.21336	1.06885e-78
PDPK1	0.21277	8.14798e-64
FAM117A	0.212605	5.05067e-100
IL6ST	0.212534	3.66554e-79
PPP2R5A	0.212465	9.43032e-78
ARIH2	0.212146	9.00088e-109
SNX1	0.212029	5.89321e-83
GPATCH8	0.2116	1.99835e-89
ARHGEF1	0.211553	1.20218e-178
EWSR1	0.211243	1.56135e-161
TP53BP2	0.21124	1.53226e-98
MTF2	0.211239	8.58313e-107
TNFRSF10B	0.21094	4.24968e-69
AMD1	0.210893	3.52802e-133
RNF10	0.210599	7.20305e-121
OPTN	0.210355	2.58691e-116
IFRD1	0.210163	2.21073e-159
GNPTAB	0.20964	3.74983e-89
NFKBIE	0.20875	9.92604e-93
PPP2R2D	0.208698	1.74728e-83
MYLIP	0.208633	7.04867e-86
CCND2	0.208485	1.50615e-113
RRM2B	0.208244	6.54433e-66
FOXK2	0.208185	5.24816e-77
SGK1	0.20767	2.78694e-62
ACAP2	0.207179	8.72495e-132
ZNF451	0.206794	5.38969e-94
CNOT2	0.206623	1.62062e-119
VEZT	0.20648	4.2902e-88
AGTPBP1	0.206155	5.26857e-59
AHSA1	0.205969	1.39662e-129
MIA3	0.205884	4.41261e-106
ZBTB38	0.204982	6.74566e-93
GRK2	0.204939	2.84407e-117
ZBTB16	0.204909	5.03679e-55
FBRSL1	0.204585	5.15859e-79
RAB1A	0.20416	5.99236e-130
CSGALNACT2	0.204155	2.73827e-85
AEBP2	0.204039	2.93969e-78
ATF7IP2	0.203644	6.87925e-92
YY1AP1	0.203614	5.30337e-81
GGNBP2	0.203536	1.13254e-178
DCP1A	0.203536	1.04782e-118
FAM91A1	0.20334	1.38352e-81
INO80D	0.203027	3.29874e-81
TBC1D1	0.203002	2.2512e-130
NUTM2A-AS1	0.202949	8.81693e-139
FAM107B	0.202927	9.47938e-207
SRP54	0.202622	4.16758e-86
PHTF2	0.202219	6.26356e-113
CAPN7	0.201722	5.67297e-90
LIMS1	0.201441	8.08248e-77
UIMC1	0.201319	6.61543e-109
UBE2K	0.201051	1.60394e-127
MSL3	0.200824	1.86894e-77
APP	0.20071	3.46185e-59
NAMPT	0.200542	1.74479e-181
TLK1	0.200413	1.35129e-134
IL4R	0.200326	1.80742e-52
UBE2G1	0.20028	6.16998e-125
TYMP	0.200256	1.92666e-99
ADNP	0.199417	2.15854e-102
AIM2	0.199386	5.26596e-126
UBE2G2	0.198739	3.67209e-89
AC008105.3	0.198497	2.10466e-95
EGR1	0.198353	7.97744e-35
PTBP3	0.198264	5.60396e-145
PHF3	0.198135	2.47178e-179
HSPA9	0.197879	2.89764e-185
MTMR14	0.197575	1.79259e-81
MS4A1	0.197161	2.65249e-180
NXF1	0.196843	3.97108e-74
SNX8	0.196819	2.30141e-124
RASGRP3	0.19625	3.65929e-100
USP11	0.195859	2.84781e-79
TPR	0.195583	1.03829e-132
SEC23A	0.195569	5.74859e-83
CLEC2D	0.195089	4.58473e-83
POLK	0.194594	8.21821e-106
NEMF	0.194292	5.12576e-90
SPOCK2	0.19416	1.04972e-109
FUBP1	0.193988	2.47713e-121
IARS	0.19397	1.18978e-62
N4BP1	0.193702	2.56793e-70
LRPAP1	0.193429	3.45579e-107
CEBPZ	0.192919	3.1112e-115
OTUD6B-AS1	0.192834	1.74629e-86
HIPK3	0.192218	9.38636e-69
TCF7	0.192188	2.49959e-69
MSL2	0.191778	3.88523e-61
AHR	0.19177	6.2543e-96
MLLT10	0.191504	1.29492e-71
CLIC4	0.191242	1.94368e-157
KLF9	0.19122	2.70436e-96
ZNF33A	0.191019	1.4349e-66
BSDC1	0.190675	6.28497e-87
CAPN2	0.19044	4.86726e-88
RAB3IP	0.190272	1.23984e-76
SRSF4	0.190117	2.56238e-167
NRF1	0.190116	7.69145e-64
TP53INP1	0.189548	9.14119e-121
USP16	0.189531	9.30208e-93
TXNRD1	0.189475	1.22415e-87
SND1	0.189163	7.13741e-124
TEX9	0.189108	1.43783e-95
PITPNB	0.188906	1.47932e-114
TCF3	0.188831	1.38951e-98
KLHL5	0.188529	1.57539e-106
SLK	0.188184	3.13279e-67
WDR48	0.187988	1.5784e-66
ETNK1	0.18782	2.08273e-160
SEC24B	0.187077	5.80503e-72
WIPF1	0.186979	2.55159e-210
KCTD20	0.186909	6.49492e-72
PXK	0.186198	5.11415e-108
PURA	0.186124	8.57472e-90
KIF2A	0.186067	1.01918e-117
MGMT	0.185415	3.98305e-139
CFDP1	0.185391	5.76697e-106
BTBD7	0.185372	2.75844e-69
RCOR3	0.184984	5.79074e-64
IFT57	0.184919	8.32476e-147
SECISBP2	0.184532	9.9326e-108
IVNS1ABP	0.184259	4.12785e-87
SEC14L1	0.184076	1.27954e-106
CBFB	0.183838	3.53412e-73
SUPT6H	0.183653	1.40458e-65
MARS	0.183622	1.85739e-91
IPMK	0.183307	6.5626e-59
PCNX4	0.182923	4.12479e-65
WEE1	0.182567	2.07574e-98
NUMA1	0.182482	1.52034e-69
HEXA	0.182064	1.81115e-72
EIF5B	0.181811	2.65023e-117
NUDT4	0.181774	9.52294e-120
STT3B	0.181358	1.44598e-90
COL19A1	0.181117	3.09589e-50
ZNF821	0.181093	3.93688e-87
TFEB	0.180891	4.60275e-102
FAM49B	0.180367	3.31382e-158
ATF2	0.179993	3.77975e-87
XIAP	0.179784	3.7609e-83
KAT7	0.179718	1.78027e-83
OXR1	0.179545	1.10146e-97
MAP2K3	0.179235	3.08117e-98
NFATC2IP	0.179039	1.81706e-66
NUB1	0.179025	1.15038e-139
LMBRD1	0.178947	2.41711e-181
ST3GAL1	0.178167	4.03764e-89
SOS2	0.177735	2.85017e-63
SLC16A3	0.177527	2.01992e-94
CAB39	0.177393	2.63272e-74
RRAS2	0.177069	1.01747e-132
MAGT1	0.177032	9.69085e-84
MGAT4A	0.176795	5.40946e-68
ECD	0.176367	1.05583e-70
ARL4C	0.175321	1.0047e-56
RBL2	0.175102	2.43264e-69
KMT2E-AS1	0.175043	1.83729e-71
TLE3	0.174648	1.63903e-100
GNB5	0.174606	7.62592e-108
CHMP7	0.174237	1.4319e-65
SH2B3	0.17419	6.18871e-60
TBC1D15	0.173715	2.07077e-79
CORO7	0.173539	1.85099e-111
CCNH	0.173277	3.43441e-181
GBP2	0.17319	3.32132e-53
AKT2	0.172939	6.78265e-69
HCLS1	0.172753	1.68071e-191
KMT2B	0.172439	5.65644e-72
DCAF6	0.171889	9.14402e-68
ATP1B3	0.171864	5.46206e-120
PAK1	0.171784	4.08252e-76
ZNF460	0.171717	6.96679e-58
MORC3	0.171433	1.36095e-122
SESN1	0.171365	9.16762e-63
WAPL	0.170945	2.29766e-94
FOSB	0.170682	3.84818e-132
CASC4	0.169613	6.37095e-74
PPP1R15A	0.169587	7.26838e-143
TM9SF3	0.169176	1.59289e-124
RYK	0.168774	4.09872e-77
CAND1	0.168727	3.23108e-123
DDX3Y	0.168543	1.272e-164
SMAD2	0.168292	1.17473e-77
ELP2	0.167561	3.45884e-82
TMEM154	0.167521	3.39204e-124
TNFRSF1B	0.16691	1.13616e-98
SUCLG2	0.16675	3.14543e-76
CCDC18-AS1	0.166688	4.6481e-93
IRF4	0.166448	3.11943e-109
PHF10	0.166384	1.46114e-70
CLTC	0.166366	2.30275e-77
PSEN1	0.165879	4.77607e-70
HOOK2	0.165398	4.99676e-107
EIF3A	0.164581	1.07704e-169
E2F5	0.164567	1.69922e-75
PPP2R5E	0.163837	4.76429e-72
ZNF721	0.163828	3.27504e-102
SENP6	0.163664	1.54326e-114
TDG	0.163633	2.15586e-74
TENT2	0.163351	1.32164e-87
ACSL4	0.163267	1.03853e-66
UBE2W	0.16297	3.64121e-62
GON4L	0.162752	1.37011e-73
RABEP2	0.162462	1.52173e-78
MRPS5	0.162343	3.07742e-84
NSD1	0.162212	1.1942e-66
FAM50A	0.16215	8.07781e-82
SAMD4B	0.162103	4.83356e-80
PPP3R1	0.161	1.82667e-121
ZBTB25	0.160914	1.262e-121
CYFIP2	0.160856	4.01734e-134
U2SURP	0.16084	5.63842e-110
AP1G2	0.160415	2.21024e-68
LRIF1	0.160197	1.13726e-62
GNA12	0.159829	4.71131e-75
RO60	0.159689	6.70912e-68
G3BP1	0.159615	1.10012e-145
RABGAP1	0.159481	8.34365e-61
DNAJB4	0.15942	8.99038e-39
RASGEF1B	0.15905	5.14464e-129
WDFY1	0.158925	1.73517e-78
ZCCHC8	0.158867	3.01349e-56
PRKACB	0.158777	1.12131e-58
COMMD10	0.158682	2.28211e-69
RIPOR1	0.158679	8.3432e-117
PFKL	0.158399	8.88088e-70
OIP5-AS1	0.158364	4.48675e-111
LBH	0.158334	1.10346e-87
FBXO21	0.157953	2.46341e-80
ZNRF2	0.157689	4.80703e-88
NEU1	0.157466	5.75487e-109
MKNK2	0.156905	9.6473e-202
EIF4G1	0.156872	1.02859e-67
CEP57	0.155544	3.91889e-128
CTSB	0.155517	1.3673e-52
ORAI2	0.154738	8.73487e-103
HOOK3	0.154282	1.86182e-104
GNG2	0.153886	4.77565e-134
WHAMM	0.153837	1.11776e-127
PDE4B	0.153723	4.94701e-144
MANBA	0.153237	1.96248e-95
MDFIC	0.153217	3.92556e-116
NAGK	0.153025	1.17194e-72
HNRNPA3	0.152957	1.17971e-235
CBWD2	0.152882	1.72518e-82
MAPK6	0.152661	4.49528e-62
TLN1	0.152613	3.53662e-147
SRGAP2C	0.152324	3.5274e-70
CLASRP	0.152024	1.52362e-90
TBXAS1	0.151272	9.86689e-60
STK17A	0.151064	5.62216e-216
GNL1	0.151054	2.68538e-139
CDK16	0.150986	2.46032e-61
SEC63	0.15093	5.36836e-75
IL10RA	0.150864	5.53149e-104
PRMT2	0.150769	8.672e-107
RAP1A	0.150628	4.90933e-199
REST	0.150555	3.34299e-86
UTY	0.150539	3.32664e-104
TENT5C	0.150507	7.73154e-139
NUP58	0.150441	2.69974e-93
RAP1GDS1	0.148393	4.60704e-67
DNAJB14	0.148072	1.05385e-106
GCH1	0.147474	6.06073e-85
CCAR1	0.147449	3.94993e-93
HECTD1	0.147224	1.09245e-71
NEK6	0.147007	5.48168e-75
SMARCA5	0.146769	3.1996e-141
CEP120	0.146552	4.8929e-83
ZNF148	0.146463	3.60711e-76
RNGTT	0.14644	4.40986e-66
DHX15	0.146405	4.23732e-98
BTG2	0.146306	2.09669e-179
CBWD1	0.146233	7.14124e-77
RBM27	0.146113	3.6064e-76
HERPUD2	0.145816	4.1101e-115
EPSTI1	0.145376	3.5657e-84
RBM39	0.145195	9.98598e-220
RNF4	0.144789	1.14009e-100
PPP3CC	0.14432	2.88753e-138
RAB21	0.144268	4.43009e-180
LBR	0.143905	1.20937e-99
ARHGAP4	0.143439	9.09597e-120
TPM4	0.143348	1.23747e-203
PRKCD	0.143074	4.339e-68
ATP6V1A	0.143005	7.97497e-72
MICU2	0.142938	1.14103e-93
RAB10	0.142782	2.80346e-110
HBS1L	0.142451	4.40419e-80
PIK3AP1	0.142387	2.4043e-102
YTHDF3	0.142327	7.15549e-61
THRAP3	0.142032	5.16387e-142
PTGER4	0.141833	1.44026e-51
TSPAN14	0.141341	1.02814e-56
TBRG1	0.140841	9.79276e-83
CCNK	0.140738	4.81224e-92
SEPTIN9	0.140621	1.45415e-185
BUB3	0.140262	2.52308e-135
SKAP2	0.140156	1.25069e-130
MED17	0.140155	2.68859e-65
NAA50	0.140043	1.88051e-149
QRICH1	0.140031	1.05436e-64
ENSA	0.138853	5.0783e-194
SLC37A1	0.138237	3.21696e-100
CCNT2	0.137963	1.438e-61
TAPT1	0.137683	4.82443e-57
CCDC32	0.137372	6.13656e-86
ZFX	0.137119	1.32239e-70
ZFAND5	0.136718	1.77202e-159
PRDM1	0.136691	9.58458e-75
PPP6R1	0.136559	7.23607e-99
ABCF1	0.136512	9.29633e-94
TRIM22	0.136303	2.04632e-187
SRRM1	0.135887	1.78457e-201
ZMYM5	0.135726	4.80439e-69
LONRF1	0.135441	1.62048e-91
TAZ	0.135313	1.31342e-69
SYK	0.134495	6.18138e-73
CDC40	0.134221	1.0257e-89
TAX1BP1	0.134111	5.09918e-197
CDC73	0.133548	1.89893e-113
PRRC2A	0.132501	1.07209e-87
METTL8	0.132107	9.81751e-77
SFSWAP	0.131792	3.89423e-82
FAM102A	0.130567	1.91459e-106
C9orf72	0.129286	9.31683e-108
ZNF652	0.128977	4.17379e-72
UBE3A	0.128814	2.85781e-99
R3HDM2	0.128785	8.81155e-91
PAFAH1B2	0.128118	3.66503e-76
PRKRIP1	0.128029	1.07771e-61
ARHGAP25	0.128023	5.32206e-142
2024-03-03	0.12793	3.93094e-84
TCERG1	0.12769	1.15536e-62
UBXN2A	0.127179	2.00315e-63
CDC42EP3	0.127012	1.69478e-153
NUTM2B-AS1	0.126549	3.37334e-123
C5orf56	0.126301	3.99093e-112
SENP5	0.125742	1.19285e-53
UBAP2L	0.125638	8.73304e-71
UGP2	0.12548	3.75964e-59
ZC3H13	0.124555	9.23372e-64
GIT2	0.124186	1.39399e-99
SMC1A	0.123997	4.96692e-58
MTHFD2	0.123974	4.75786e-113
ZNF431	0.123547	1.7206e-63
PDCD4	0.12334	9.03577e-181
CCDC47	0.123328	1.08743e-99
EMC10	0.1233	1.98417e-85
CD80	0.12206	1.19477e-61
ZNF267	0.122051	8.81572e-142
TAF15	0.122029	4.63525e-126
UBQLN1	0.12168	3.60054e-145
SIDT1	0.121191	5.32656e-58
SPPL2A	0.120185	1.1301e-128
TNPO1	0.119741	1.56027e-96
TMC6	0.11959	2.64707e-133
MFSD14A	0.119446	3.68125e-108
TOR1AIP1	0.119308	5.71577e-62
KCNAB2	0.119303	7.90491e-67
SYNCRIP	0.119112	1.21297e-89
FBXO33	0.119098	3.31999e-66
SEC31A	0.118498	4.42683e-84
BTK	0.118494	1.11414e-110
WDR43	0.118225	8.1196e-80
ERAP2	0.118082	1.48614e-71
COQ10B	0.117726	2.41608e-92
ANXA6	0.117695	9.02418e-155
INTS10	0.117463	1.70934e-68
VRK2	0.117218	1.48256e-51
TASOR	0.117168	7.61979e-61
CCDC82	0.116565	3.17283e-76
TSPYL1	0.115921	2.01589e-97
TMOD3	0.115883	7.31731e-99
WTAP	0.115636	5.11387e-205
CUL4A	0.115313	3.9757e-60
KATNBL1	0.115257	2.28606e-64
YAF2	0.115154	3.35491e-78
NECAP1	0.115087	2.50803e-92
CCM2	0.114981	2.58761e-61
ITGB1	0.114845	5.86049e-109
PCED1B	0.1148	4.11574e-56
MIOS	0.114557	1.29158e-117
PIGT	0.112977	8.93852e-91
NDEL1	0.112705	9.06381e-76
DCAF8	0.112578	2.98901e-82
NFKBIB	0.112498	9.53051e-92
STAT5A	0.110725	4.85305e-73
GOLPH3	0.110577	2.84845e-82
TRAF5	0.109849	2.54828e-115
NOP56	0.108678	1.6007e-70
MEX3C	0.108113	6.56393e-60
TRIM13	0.107647	3.45801e-71
MEF2D	0.107182	2.72245e-88
SOD2	0.10693	5.20995e-146
RIOK3	0.106736	1.02146e-108
SPCS3	0.106614	7.3742e-102
LDLRAD4	0.106235	1.47797e-134
DDX27	0.105844	4.32223e-90
TMED8	0.105487	1.63602e-87
PCMTD1	0.105461	3.19908e-171
DELE1	0.105131	8.76721e-59
ARRDC2	0.105093	6.217e-132
TGIF2	0.105042	2.59005e-107
SLC50A1	0.104905	3.68972e-79
CAMTA1	0.103681	1.38003e-133
ZBTB7A	0.103442	2.42956e-155
PNPLA8	0.103031	1.19455e-136
VPS4B	0.102718	7.37042e-63
BATF	0.102214	2.01718e-51
TGFBR1	0.102212	8.52064e-64
AP1B1	0.10168	4.52109e-71
SRSF11	0.101679	3.40458e-213
CEP95	0.101675	1.16743e-69
CARD8	0.101536	1.58239e-78
RSBN1	0.101531	3.05682e-85
LPGAT1	0.101304	5.36164e-90
TM9SF2	0.100976	4.18816e-124
B3GNT2	0.100761	1.09938e-87
KRAS	0.100578	2.31609e-185
SUDS3	0.100148	2.81561e-57
STX5	0.100142	1.04554e-130
IDS	-0.10044	1.55823e-198
PTOV1	-0.10064	3.02324e-86
IMP3	-0.101194	1.65493e-54
TBC1D10C	-0.101667	2.99487e-62
MAP1LC3A	-0.101679	4.70313e-50
HCFC1R1	-0.101922	3.17529e-47
BFAR	-0.102086	3.69608e-86
CLECL1	-0.10282	2.29446e-114
NGDN	-0.102956	2.17984e-69
STK17B	-0.103682	1.01405e-197
TMEM170A	-0.104042	1.61458e-110
RAD21	-0.104438	1.23738e-158
PAXX	-0.104454	5.39232e-81
SERTAD3	-0.105492	4.62558e-73
FAM30A	-0.105711	6.62206e-67
NR1H2	-0.105815	2.31435e-150
AMZ2	-0.107013	7.56731e-59
CBX3	-0.107322	1.17802e-132
RIPK2	-0.107345	9.51265e-106
PSMA3	-0.10801	1.97368e-96
CCT6A	-0.108214	1.6393e-124
MRPS26	-0.108369	1.40353e-48
ARL8A	-0.108525	1.68611e-82
KDELR2	-0.109078	3.69665e-58
RAB14	-0.109125	2.47621e-97
LYL1	-0.109743	2.17836e-68
HTRA2	-0.110174	6.48767e-73
MED4	-0.110308	2.69404e-42
AL139246.5	-0.11077	1.33002e-47
PNPLA2	-0.110924	3.87013e-102
PRMT1	-0.111023	3.43938e-195
HNRNPDL	-0.111244	1.06321e-232
DCTN2	-0.112279	2.06078e-65
UBE2L3	-0.112553	1.62401e-86
TMEM167B	-0.112617	1.32652e-52
AP001011.1	-0.112758	3.20523e-37
FAM136A	-0.113362	8.74727e-68
C4orf48	-0.113421	2.08354e-68
IMP4	-0.113453	2.67142e-44
RPN2	-0.113494	1.65608e-65
SNRPA	-0.113537	3.57092e-81
UHMK1	-0.11355	4.99493e-76
RAB24	-0.113635	1.14277e-39
NAP1L1	-0.11376	1.17995e-219
OLA1	-0.113884	6.76197e-82
ANTKMT	-0.114486	2.65483e-59
KLF6	-0.114657	5.99511e-136
SUZ12	-0.115021	1.25509e-116
LTA4H	-0.115044	1.75858e-91
SRSF5	-0.115399	1.16625e-205
SHFL	-0.116661	1.69019e-96
UBE2S	-0.116688	2.55879e-130
STMN1	-0.117579	2.91163e-70
YBX3	-0.117594	2.48161e-40
SMU1	-0.117773	1.82667e-76
DENR	-0.117857	5.38745e-55
CYP51A1	-0.117957	3.97968e-104
CLEC2B	-0.118022	8.78364e-70
CYB561A3	-0.118446	1.84601e-73
IFNGR1	-0.118511	4.74617e-122
PMAIP1	-0.119346	2.34366e-190
CISD2	-0.119863	1.52151e-70
OTUD1	-0.120282	5.71658e-101
NSMCE3	-0.120738	3.01111e-106
PBDC1	-0.120749	4.42987e-46
PEA15	-0.120848	1.02193e-146
TBPL1	-0.12118	7.62618e-60
BCL9L	-0.121944	1.65965e-55
AP3S1	-0.122249	1.49283e-95
CD59	-0.122283	6.07847e-55
FDPS	-0.122319	1.85196e-52
PRR7	-0.122549	1.91457e-60
PSMF1	-0.122768	1.20826e-62
PDAP1	-0.122843	9.89152e-56
RBM4	-0.123635	1.48141e-141
SCAND1	-0.123689	4.91354e-112
RPAIN	-0.123845	1.85296e-73
BBC3	-0.123866	1.27633e-97
ARCN1	-0.124021	9.34133e-39
PLAAT4	-0.124601	2.05179e-73
CLTA	-0.124767	2.02759e-94
DAXX	-0.125006	3.86411e-56
RPN1	-0.125224	2.48205e-67
FAM177A1	-0.125525	1.74571e-104
TIA1	-0.125556	2.14341e-66
RAB9A	-0.125941	1.00742e-100
CNPPD1	-0.126785	7.09707e-117
PTP4A2	-0.126828	2.76531e-192
SAT2	-0.127262	1.12638e-82
HAGHL	-0.127376	5.70701e-49
DERL1	-0.12745	2.20956e-87
EMC3	-0.127528	6.23105e-65
AURKAIP1	-0.127676	6.1652e-99
SNRPA1	-0.127705	2.66587e-120
RFX5	-0.127762	8.76026e-56
RNF167	-0.128109	3.62279e-60
RGCC	-0.12811	1.80243e-43
MAPRE1	-0.128204	8.73324e-81
CCPG1	-0.128207	2.11564e-44
TRAPPC5	-0.128351	4.26768e-138
DUSP4	-0.129785	2.4316e-29
HPRT1	-0.12979	8.44084e-62
UNC119	-0.129867	8.67371e-105
SYF2	-0.130139	6.92687e-156
ODF3B	-0.130158	1.62453e-55
C16orf87	-0.130173	1.70366e-52
PCIF1	-0.130918	6.77e-45
ZMAT2	-0.130979	6.20883e-52
SELENOT	-0.131092	1.14487e-138
RNASEH2C	-0.13116	1.08223e-57
GUK1	-0.131553	2.85115e-193
ACTR10	-0.131717	1.22907e-46
NFKBIA	-0.13178	6.27866e-107
TRAPPC3	-0.132024	4.5147e-54
CASP4	-0.132635	6.45372e-98
FAM204A	-0.132973	5.63883e-56
MRPL42	-0.133	1.49817e-48
GAPT	-0.133095	3.3762e-54
TBCB	-0.133201	8.17773e-58
S100A11	-0.133449	1.35869e-60
PPP1R18	-0.133712	1.27253e-78
PTPN6	-0.133855	5.57156e-78
CLPP	-0.133896	6.09518e-64
NT5C	-0.134087	1.52435e-127
HSBP1	-0.13482	9.16677e-61
SRSF8	-0.135063	5.07207e-75
ARPP19	-0.13508	1.13787e-128
NDUFB7	-0.135238	1.46444e-61
PIP4P1	-0.135774	1.81295e-98
ZPR1	-0.136372	2.11581e-54
BUD23	-0.136702	3.21666e-73
OTUB1	-0.136754	6.27158e-74
HIST1H2AC	-0.136841	1.45173e-54
RER1	-0.137092	2.63692e-53
PSMA6	-0.137423	2.73682e-85
LSM8	-0.137826	3.6439e-121
2024-03-09	-0.137878	2.63389e-115
HVCN1	-0.138713	4.99953e-116
CWC15	-0.138736	3.45219e-57
SC5D	-0.139	1.60294e-39
LSM12	-0.139056	2.23911e-67
XRCC5	-0.139791	1.22742e-172
RALA	-0.140198	2.66436e-117
NGRN	-0.140299	6.48438e-69
SPI1	-0.140316	8.17668e-101
CYB5R3	-0.140921	1.87797e-62
EFHD2	-0.141292	3.29496e-84
CYB5A	-0.141997	2.43834e-56
CSK	-0.142251	2.54991e-107
PSMA5	-0.142453	2.04863e-92
MICOS13	-0.142462	3.83466e-83
PQBP1	-0.142494	1.39471e-121
GPR65	-0.142555	2.35175e-93
MRPS34	-0.142685	3.38197e-75
CCT4	-0.143106	1.87727e-181
METTL21A	-0.143331	2.03986e-99
MMP24OS	-0.143441	7.40153e-67
NAA10	-0.143482	3.84987e-77
CD79B	-0.143746	5.64754e-101
BEX4	-0.144004	6.13141e-37
HDAC1	-0.144311	1.13855e-79
FERMT3	-0.144502	6.85486e-72
RHOB	-0.144572	5.30148e-114
LYPLA1	-0.144668	1.40472e-76
ZC3H15	-0.145123	7.75078e-131
TFAM	-0.145473	5.24847e-48
PPM1G	-0.145496	2.65183e-99
HHEX	-0.146137	7.2645e-60
TMEM123	-0.146438	1.01778e-146
MCM5	-0.147036	5.90694e-55
CARHSP1	-0.147176	1.68268e-50
IFI27L2	-0.147645	8.66381e-65
SCPEP1	-0.147884	2.69624e-62
MRPS15	-0.14801	1.36067e-49
CLTB	-0.148779	5.54189e-56
MRFAP1	-0.149429	1.99714e-117
CD72	-0.150492	4.16534e-62
NDUFAF4	-0.151264	2.27684e-75
ATP6V0D1	-0.151628	4.81209e-144
RAB8A	-0.151799	1.37338e-78
REPIN1	-0.1518	4.98305e-58
RBM17	-0.151866	1.3274e-132
SNRPD1	-0.152043	3.30437e-61
MFF	-0.152074	1.9783e-76
ERVK3-1	-0.152128	6.0639e-100
DUSP5	-0.152543	2.01845e-64
HNRNPR	-0.15273	1.84515e-142
CCND3	-0.152836	1.31817e-145
CD19	-0.152899	3.55853e-103
PCBP2	-0.153062	2.42634e-185
IGHM	-0.153493	2.02439e-37
GBP4	-0.154083	9.25459e-37
SAV1	-0.154206	7.32209e-76
ADRM1	-0.154291	1.30515e-80
RP9	-0.155479	1.34928e-49
RGS10	-0.155598	5.89041e-92
MAP2K2	-0.155803	4.21495e-117
INSIG1	-0.15593	5.98591e-70
OCIAD1	-0.155956	1.04707e-104
SCAMP2	-0.156255	1.65419e-64
SAT1	-0.156369	1.5082e-155
PSMA4	-0.156412	2.45718e-80
TAP1	-0.156886	9.66443e-128
TPM3	-0.157629	2.51073e-241
FIBP	-0.15769	4.72428e-54
UQCRC2	-0.157824	4.42987e-102
PSMD13	-0.157864	8.94857e-59
FCGR2B	-0.158639	7.39024e-74
GRSF1	-0.158681	7.52182e-63
SASH3	-0.15883	2.12227e-74
MKRN1	-0.158947	9.41878e-131
ARL14EP	-0.159613	4.04025e-68
PPP1R11	-0.160444	5.16131e-84
MARCKSL1	-0.161152	3.64453e-119
NUDT21	-0.161505	3.38031e-54
PDCD6	-0.161945	4.3189e-74
FDX1	-0.16215	2.79797e-73
MRPL50	-0.16223	4.67725e-54
PRKRA	-0.162598	3.01988e-106
SPIB	-0.162615	7.36026e-147
PDCD5	-0.162678	6.11809e-71
ELAVL1	-0.162838	5.54148e-55
DR1	-0.163086	1.69642e-64
DAZAP2	-0.163499	3.89895e-228
SMIM29	-0.163759	2.97369e-44
IK	-0.164114	2.12484e-100
TXNL4A	-0.164354	6.6158e-107
SOCS3	-0.164429	1.28384e-57
TNFRSF13C	-0.16463	3.81844e-210
SSNA1	-0.164673	1.51113e-77
WBP2	-0.164988	4.06326e-134
IAH1	-0.165092	1.11788e-80
PSMB7	-0.165259	1.75419e-63
IDH3G	-0.165491	4.72919e-66
SLC25A38	-0.166164	2.20706e-57
FKBP1A	-0.166191	1.04101e-71
SF3A1	-0.166253	6.05904e-111
FAAP20	-0.167334	7.25339e-81
METTL23	-0.167543	1.26102e-72
SLC39A3	-0.167846	3.11918e-80
TGIF1	-0.167878	7.28778e-105
C12orf75	-0.168176	1.00725e-56
BLOC1S4	-0.168303	2.4098e-51
ATP6AP2	-0.168457	8.17415e-54
MRPL20	-0.168731	1.82793e-76
EGLN2	-0.168735	1.13587e-114
SS18L2	-0.1688	8.57048e-100
HIST1H1C	-0.168808	6.18902e-77
HNRNPL	-0.169265	1.02844e-185
RNPS1	-0.169371	7.13248e-188
CCR7	-0.169602	2.09454e-119
ST13	-0.169723	1.65226e-216
TMEM159	-0.169918	1.2409e-73
ZFP36L1	-0.169991	4.82196e-175
TUBA4A	-0.169993	8.49251e-161
PSMD7	-0.170461	4.85747e-108
NFU1	-0.170505	9.90446e-55
PCMT1	-0.17079	7.28606e-71
NDUFV2	-0.170891	7.35506e-162
HSD17B11	-0.172162	2.33588e-72
CHRAC1	-0.172376	6.36482e-79
GLRX	-0.172404	5.28834e-68
PSMD4	-0.172426	1.98182e-73
SEM1	-0.172547	1.01039e-84
CCNDBP1	-0.172675	7.59031e-81
BCL3	-0.172919	4.66025e-108
SNHG1	-0.172965	9.19855e-145
PWP1	-0.172989	3.81916e-103
SERINC1	-0.17305	7.40957e-123
CHMP2B	-0.173552	1.09065e-78
MRPL51	-0.17359	6.09046e-62
RABGGTB	-0.173822	6.95121e-121
A1BG	-0.173984	2.57694e-75
PPP2R1A	-0.174537	7.57018e-96
BST2	-0.174804	9.47779e-144
ETFB	-0.175385	1.24488e-52
AKR1A1	-0.176113	1.51865e-77
DHPS	-0.176284	5.56976e-96
NR4A2	-0.176413	1.27972e-139
PKIG	-0.176824	9.86285e-169
MRPL57	-0.177412	8.30631e-57
PTTG1	-0.177657	2.58328e-60
BTF3L4	-0.177694	1.34896e-56
GRINA	-0.178024	1.30623e-69
APOBEC3G	-0.178183	9.97146e-63
CANX	-0.178432	1.33627e-107
ALOX5AP	-0.178536	6.6271e-76
ZNF581	-0.178544	1.67832e-123
BIN1	-0.178624	2.09597e-83
PPP6C	-0.178887	2.08135e-78
CTSH	-0.179114	2.33686e-169
CLDND1	-0.179208	1.76694e-133
PTDSS1	-0.179274	6.56927e-75
PSMB2	-0.179442	3.52323e-74
TMEM243	-0.179457	2.22754e-194
SF3A2	-0.17953	5.00167e-86
TMEM14B	-0.179974	2.77422e-72
BLOC1S1	-0.180088	9.56545e-113
LHPP	-0.180514	4.79024e-57
EMC6	-0.181016	1.19988e-68
AP2S1	-0.181142	2.41355e-60
ARL6IP4	-0.181173	1.18702e-196
NTMT1	-0.18189	1.34766e-70
RBCK1	-0.1819	1.57562e-99
CDKN1B	-0.182067	1.40856e-168
COX20	-0.182217	3.86005e-76
SRPRA	-0.182298	3.43242e-111
GSTO1	-0.182553	8.94335e-105
AP1S2	-0.182924	1.8249e-82
HEBP2	-0.183621	2.21034e-87
METTL9	-0.183959	3.62781e-93
OSTC	-0.184571	4.51557e-52
TMEM134	-0.184577	1.73909e-72
PUF60	-0.184581	2.30887e-74
PYCARD	-0.18538	1.5857e-51
ANKRD10	-0.185736	3.04477e-151
ITM2C	-0.186071	1.80808e-67
NBDY	-0.186188	4.66164e-132
YDJC	-0.186515	1.89227e-52
DDIT4	-0.186525	4.80111e-154
PHF5A	-0.186526	5.01068e-46
TMEM248	-0.18687	7.28566e-106
TSPAN13	-0.186913	3.90808e-60
TAF9	-0.186995	4.61202e-63
NDUFB6	-0.187294	3.40727e-66
UQCRC1	-0.18753	7.3142e-48
SDHB	-0.187637	1.43641e-57
DNAJA2	-0.187756	9.60423e-126
RBM38	-0.188338	1.12286e-147
AC058791.1	-0.188481	3.47647e-74
SRP19	-0.188561	2.52931e-68
ANXA5	-0.189049	1.65745e-123
NRBF2	-0.189169	1.86822e-63
TXN2	-0.189787	1.71539e-56
RAB5IF	-0.18983	1.58201e-85
SMS	-0.189835	1.17791e-68
MRPS16	-0.189852	1.7114e-61
SERPINB1	-0.189937	8.13613e-111
SYS1	-0.190274	5.84517e-64
DNAJC8	-0.190766	1.68176e-94
TMEM50A	-0.190774	5.46703e-156
TSR2	-0.190782	1.43378e-53
SDCBP	-0.191972	2.4637e-161
SARS	-0.192048	1.45113e-88
HADHA	-0.192083	5.74816e-139
ARF4	-0.192231	4.34282e-155
BNIP2	-0.192573	6.295e-126
STUB1	-0.19284	1.11631e-104
DNAAF2	-0.192948	9.79219e-76
VPS35	-0.193136	9.91374e-93
TMED4	-0.193293	1.19082e-122
MICOS10	-0.193347	4.77145e-105
RAB11B	-0.19372	2.97435e-93
EIF4H	-0.194504	9.76109e-133
POLR3GL	-0.194804	3.8543e-60
MLF2	-0.194843	4.3594e-100
FCER2	-0.195294	3.82298e-57
SF3B1	-0.195493	5.23123e-225
C9orf78	-0.195536	3.02686e-120
DHRS7	-0.195656	2.61895e-85
NME4	-0.19573	6.99792e-59
SLC39A1	-0.196111	7.31955e-62
RNH1	-0.196752	8.11034e-116
ZYX	-0.196853	1.96987e-65
FLOT1	-0.196939	1.82468e-50
FUNDC2	-0.198449	7.36577e-68
SERBP1	-0.19862	1.49938e-198
MED10	-0.199075	1.02473e-101
MIEN1	-0.199242	1.08326e-47
TMEM179B	-0.199371	1.09072e-66
PRNP	-0.199702	6.42767e-154
BLOC1S2	-0.201365	1.2214e-78
PDCD2	-0.201653	2.53179e-60
YWHAB	-0.202823	6.36525e-155
YPEL3	-0.203376	5.15173e-168
MRPL43	-0.203672	3.55988e-50
DDAH2	-0.203674	2.68365e-122
CAPNS1	-0.203917	4.78132e-100
KPNA2	-0.204167	4.28026e-87
PSMB10	-0.204451	4.82082e-95
SEPTIN7	-0.204725	1.88098e-193
SNRPE	-0.205121	2.19826e-62
TWISTNB	-0.205451	9.19282e-81
CD40	-0.206559	7.09995e-167
TMEM147	-0.206758	7.40717e-67
DCTN3	-0.207371	2.41558e-66
FAM162A	-0.207536	8.25618e-70
TRAM1	-0.207568	1.19212e-112
G3BP2	-0.208119	9.66372e-172
YWHAZ	-0.208263	1.06227e-216
ROMO1	-0.208612	1.55769e-112
[truncated: 820 more rows]

## Sheet: table S8 IPF vs Con mature B
table S8. Differentially expressed genes in IPF vs. Control mature B cells
Gene	Avg_log2FC	Adjusted_pValue
FP236383.3	5.98444	0
HSPA1A	2.91756	3.02497e-192
HSPA1B	2.45141	4.19784e-127
DNAJB1	2.44601	1.65572e-138
FP671120.4	2.3771	6.54478e-283
RBFOX2	2.13861	1.07496e-301
IGKV3-20	2.03746	9.98115e-88
PTPRCAP	1.92974	0
HLA-DRB5	1.89089	0
HSPA6	1.88357	1.315e-56
BACH2	1.79314	3.80057e-159
HSP90AA1	1.75971	5.19282e-119
IGKV1-5	1.75121	5.54021e-71
HSPA8	1.70177	1.36323e-266
HSPH1	1.69848	6.33981e-125
HSPB1	1.65445	1.49501e-93
SIPA1L1	1.50941	3.04995e-151
CD74	1.50379	0
AHNAK	1.4634	1.42412e-179
PDE4D	1.4519	4.65254e-95
DENND4A	1.40946	4.83332e-151
SIK3	1.32304	4.4888e-145
MT-ATP8	1.30332	2.70548e-130
RUBCNL	1.29095	1.00257e-129
TAGLN2	1.26724	1.10335e-215
IGLV2-14	1.26167	1.9322e-49
BAG3	1.23563	2.41e-64
HSPD1	1.22125	9.32416e-107
IGKV4-1	1.20289	1.98772e-37
AL135905.2	1.14168	4.32086e-146
TEX14	1.08749	4.12848e-108
IGLV1-51	1.08516	8.3908e-82
GNG2	1.07787	4.97214e-98
ARHGAP15	1.07277	6.0802e-102
ABHD3	1.03066	4.03162e-86
RALGPS2	1.01273	4.90216e-103
NR4A1	1.0096	9.35254e-83
HIST1H2AC	1.00919	6.45934e-62
ANKRD44	1.00821	1.15508e-114
MGAT5	1.00233	2.0848e-88
IGHG1	0.996117	2.9209e-50
PLEKHG1	0.991411	8.79519e-79
TAGAP	0.989455	2.88219e-86
EIF2AK3	0.97819	4.2049e-91
CRIP1	0.969598	5.34168e-73
ATF7IP	0.957853	6.88047e-94
RERE	0.945099	8.81437e-78
ACTG1	0.942318	3.01407e-148
MSN	0.936848	2.90238e-100
SELL	0.933744	6.41242e-84
SYNGR2	0.932275	6.43343e-100
NFAT5	0.930924	1.01351e-92
ANXA6	0.928632	7.49449e-97
AC120193.1	0.924387	3.10636e-79
AC138123.1	0.923584	1.12656e-144
EML4	0.918375	4.24026e-100
NFKB1	0.916914	4.59092e-61
ATP2B1	0.913742	1.79722e-87
SP140	0.91108	2.15986e-96
MAP4K4	0.898792	1.75811e-79
UST	0.891412	1.84871e-95
ALDOA	0.885573	8.10431e-88
LRRFIP1	0.883321	1.42044e-104
HOOK2	0.872025	1.57703e-84
MAPRE2	0.865757	1.67914e-79
CENPM	0.862235	1.01594e-60
RABGAP1L	0.861211	9.04182e-75
ARIH1	0.851769	1.84865e-72
AFF3	0.846799	8.77042e-48
ITGA4	0.835815	8.78568e-77
SMIM14	0.833509	4.98018e-84
BANK1	0.830399	1.18744e-78
RAB11A	0.82954	2.23265e-66
ADGRE5	0.827954	1.28221e-69
LYN	0.827739	6.32356e-80
RFTN1	0.824142	1.12489e-69
ST6GAL1	0.817446	2.81355e-64
ELMO1	0.817307	6.26424e-77
RAC2	0.810378	4.05049e-86
CYTH1	0.801434	2.54991e-76
SNED1	0.799761	7.69932e-74
LMNA	0.7982	2.06527e-38
TRIO	0.793425	1.98717e-64
CDK14	0.792182	3.61584e-69
EBF1	0.788253	6.19009e-45
PPP1R16B	0.788204	6.27384e-76
BTBD9	0.78382	2.35673e-70
MBNL1	0.783665	5.21715e-78
RIPOR2	0.783569	2.5105e-67
ANKRD33B	0.778346	8.02793e-59
ELOVL5	0.777186	2.62269e-65
HSP90AB1	0.774567	3.1218e-101
RPLP0	0.771779	3.76574e-180
AP001011.1	0.771316	1.06467e-100
ITSN2	0.767811	8.13707e-66
UBE2H	0.767428	3.25764e-69
CAMK1D	0.764743	6.00573e-68
HERC1	0.75728	3.37979e-68
VIM	0.757224	8.33791e-68
PELI1	0.756675	9.19242e-50
UVRAG	0.754871	2.69158e-65
ACTB	0.752721	8.81547e-149
PLCG2	0.752022	3.89557e-62
SNX9	0.747451	4.11701e-43
PDE7A	0.743427	1.60442e-62
ZEB1	0.741454	5.79139e-46
HSPE1	0.736914	3.08535e-31
PIKFYVE	0.735187	2.36543e-55
ZCCHC7	0.733626	1.48477e-51
MYADM	0.733276	4.70608e-38
SLC2A3	0.732197	1.43601e-68
GAPDH	0.728409	8.42556e-76
CD44	0.728247	2.38228e-80
TMEM131L	0.726268	2.49472e-59
SREBF2	0.722541	2.68651e-54
FKBP4	0.721168	3.77045e-41
CNN2	0.718695	2.15587e-57
FCER2	0.71656	4.80026e-42
PPP3CC	0.713096	5.59721e-57
MYH9	0.711402	1.94705e-56
SNX29	0.710434	5.41532e-58
CSRNP1	0.709709	7.14851e-54
FCHSD2	0.709531	1.98849e-49
ZC3H12A	0.703642	4.30204e-62
ZSWIM6	0.702903	3.00096e-52
RPS10-NUDT3	0.699956	3.69805e-85
PARP8	0.699727	3.36065e-45
EIF3L	0.698276	1.23604e-63
SCGB3A1	0.687967	3.88453e-63
SNX25	0.687049	1.47349e-63
HIVEP2	0.686614	2.75309e-49
KMT2C	0.684836	4.05961e-51
UBE2E2	0.684773	7.27603e-50
IGLV2-23	0.684035	5.90009e-38
UBC	0.682588	1.40616e-48
CD83	0.670018	1.87078e-53
MTSS1	0.667912	1.20578e-48
LRMP	0.661379	6.21743e-45
SSH2	0.659244	1.13776e-39
FOXN3	0.659176	3.8503e-50
GRK5	0.657907	4.25476e-47
DLEU2	0.657443	8.44267e-57
PALM2-AKAP2	0.657336	1.11321e-49
HDAC9	0.657221	5.2446e-49
ESYT2	0.655931	4.35463e-51
FOXO1	0.652386	2.01438e-53
PTPRC	0.652071	6.47357e-87
PACS1	0.650717	1.60485e-51
ADAM28	0.648641	2.47949e-42
CHST11	0.645351	3.96305e-41
HIST1H1C	0.643667	6.0508e-24
RAPGEF1	0.642885	2.44519e-42
PSAP	0.640953	1.30844e-46
USP15	0.6404	2.01071e-46
JAZF1	0.637203	1.30751e-43
CRIP2	0.636936	8.28424e-44
PER1	0.635633	4.55202e-38
SEPTIN6	0.634812	1.43168e-46
WDFY4	0.63307	2.22715e-53
KDM6A	0.632918	4.48832e-59
ZFAND3	0.628169	2.01425e-40
SRPK2	0.628129	1.45203e-47
COL19A1	0.627468	9.43938e-44
ZFP36L1	0.625602	5.69816e-53
MOB3A	0.624915	1.80509e-46
UTRN	0.622947	5.30665e-41
HIF1A	0.620134	3.42229e-45
TUBB	0.62001	8.13042e-40
HLA-DQA1	0.619281	1.75499e-108
CARD11	0.618904	1.24406e-47
TBC1D5	0.618706	1.98885e-46
AC022217.3	0.614692	4.1851e-80
TBC1D22A	0.614173	1.7631e-47
DNAJA4	0.613322	5.13492e-53
NSF	0.613169	3.77789e-43
PPDPF	0.612971	5.55142e-58
TMEM131	0.612589	1.42001e-41
VCP	0.612477	1.18953e-42
CROCC	0.60911	4.68768e-64
FXYD5	0.608659	6.56095e-55
LTB	0.608156	6.81603e-63
LCP1	0.605215	2.53309e-49
MAPK8IP3	0.604096	3.78936e-42
CD19	0.603913	6.32204e-45
USP24	0.603414	6.89486e-41
MCL1	0.602725	6.65574e-51
MYO1E	0.601033	2.5402e-37
ATF3	0.595723	4.01354e-33
RFX3	0.594626	5.60149e-48
USP6NL	0.593067	6.21789e-45
NCOA3	0.59206	1.01452e-37
ADK	0.590968	3.41669e-31
ZHX2	0.587897	1.4292e-33
SESTD1	0.587669	1.00078e-36
TRAK1	0.586874	1.83875e-47
CD82	0.585835	1.04828e-32
MEF2A	0.585139	1.42241e-35
BACH1	0.582058	1.94531e-37
SPEN	0.580949	5.73236e-35
MATR3.1	0.580817	4.14264e-44
PRKCE	0.577683	8.64792e-39
GLS	0.574141	2.46308e-37
USP3	0.574098	2.40282e-37
CCSER1	0.573299	1.31311e-37
UCP2	0.573024	1.81968e-34
HUWE1	0.57085	3.57878e-36
YWHAZ	0.570412	2.5378e-69
LSP1	0.569821	6.33878e-42
LINC00910	0.568799	3.26306e-44
DOCK10	0.56768	4.97803e-40
JMJD1C	0.565407	3.97063e-37
KYNU	0.56433	2.49513e-24
NGLY1	0.56366	5.54752e-30
RALGAPA1	0.562458	3.02396e-35
CD99	0.560997	5.59895e-27
FNBP1	0.558748	9.84749e-41
TMSB4X	0.558657	1.69285e-110
ARID5B	0.558595	3.99229e-49
CBLB	0.557466	3.0795e-36
ETV6	0.556616	6.49746e-34
S100A10	0.554329	1.01866e-28
SMAD3	0.553831	5.20525e-30
IER5	0.553427	1.84693e-16
HLA-DPB1	0.553221	1.71029e-120
SETBP1	0.551291	1.31471e-35
FLNA	0.551042	8.6573e-28
FCRL1	0.550978	2.48382e-39
CLIC4	0.550839	8.17126e-32
CHORDC1	0.546538	8.91846e-24
CHD7	0.545616	4.52546e-34
IKZF3	0.544552	1.22007e-33
KDM4C	0.544316	1.03196e-39
RAPGEF6	0.544307	4.27921e-35
HLA-DPA1	0.543415	2.31498e-131
ASXL1	0.541684	1.32152e-32
ZNF10	0.541283	4.78931e-41
RPL4	0.540853	4.09054e-88
STAT1	0.5376	1.40949e-27
TCF12	0.536517	3.73287e-39
SERPINB9	0.533933	1.35083e-26
AKT3	0.533344	8.28259e-32
HNRNPL	0.531819	3.48066e-37
2024-03-03	0.530562	3.15225e-30
MACF1	0.530224	4.46865e-31
DMXL1	0.529314	3.08019e-28
R3HDM4	0.5288	8.06738e-32
LPXN	0.528782	1.09368e-29
CCNY	0.52791	6.85536e-33
USPL1	0.527394	5.4219e-34
PDLIM1	0.526858	4.07051e-33
PTK2	0.524311	2.32646e-41
UBR4	0.524296	1.3645e-39
HLA-DOA	0.522582	9.34195e-39
AC009313.1	0.522242	1.18176e-67
RIC1	0.52148	1.23703e-40
AKAP13	0.521214	5.13282e-37
ADD1	0.52026	8.68114e-31
RASA2	0.520108	1.27317e-27
TMBIM1	0.520063	4.2848e-28
DOCK8	0.518664	5.67819e-31
ZC3HAV1	0.518353	2.07119e-32
LMBR1	0.518213	8.33647e-47
CCDC88C	0.517248	1.52807e-36
EWSR1	0.517184	2.48528e-32
MBNL2	0.516858	5.74566e-27
LRBA	0.515477	1.18923e-38
MCTP2	0.514578	4.09298e-37
LINC01619	0.513512	5.1974e-40
VAV3	0.51291	2.03715e-34
FLI1	0.512116	1.6224e-32
PEAK1	0.51113	2.5497e-42
DGKD	0.510387	3.35304e-33
PUM2	0.51024	2.0334e-35
MICAL3	0.508936	4.49541e-32
ID3	0.508836	1.77946e-12
NIBAN3	0.508412	4.56329e-28
STIP1	0.508348	1.19138e-23
OSBPL10	0.504985	3.82245e-31
DEDD2	0.503643	2.97979e-31
FDFT1	0.501534	3.79423e-29
MYO9B	0.499906	1.19915e-31
UBAC2	0.499892	2.01507e-32
STK10	0.49783	1.52167e-33
CREB1	0.497045	7.36788e-25
NCF1	0.495993	2.95152e-21
RIPOR1	0.495269	2.09315e-25
DYRK1A	0.494403	2.08177e-28
PABPC1	0.494395	6.89569e-54
STK24	0.494096	2.26345e-28
CYTIP	0.493899	3.8116e-36
SEL1L3	0.493663	5.05943e-23
AC025259.3	0.492868	8.57014e-42
EPS15	0.492206	4.53806e-28
CAMK2D	0.492055	4.76156e-24
MAP4	0.491652	6.91463e-26
IMPDH2	0.491361	6.36116e-27
CORO7	0.489453	4.03758e-24
STRBP	0.489237	8.77667e-26
AFTPH	0.488624	1.164e-27
ABLIM1	0.48796	1.38046e-35
MRTFA	0.487245	4.85878e-41
DIP2B	0.48616	6.80321e-37
INSIG1	0.486041	1.87383e-21
TGFBR2	0.482751	1.59866e-24
PKM	0.482351	1.169e-24
PIK3AP1	0.482255	5.81047e-32
PPP3R1	0.482153	3.9821e-24
PVT1	0.482093	1.20347e-24
PIP4K2A	0.481507	7.46366e-22
DENND5B	0.480392	9.41804e-29
MAN2A1	0.479325	1.02829e-27
UBR5	0.478778	5.68528e-30
PRKCB	0.478769	2.34316e-25
HSPA4	0.478611	1.17577e-20
ATP11B	0.477497	2.97176e-27
HMGA1	0.476849	1.82662e-27
GBP2	0.47655	4.98919e-35
UBR2	0.476526	2.54446e-30
NFKBID	0.476352	5.54006e-17
VPS37B	0.474217	8.52356e-20
AC119396.1	0.473493	4.62157e-41
RABGEF1	0.473359	5.60748e-32
USP22	0.472292	1.32657e-27
SSBP2	0.472235	2.1992e-29
NFKBIZ	0.471968	8.52249e-22
SMARCC1	0.471907	3.30026e-30
NUDT4	0.471153	1.22803e-17
IDS	0.471072	1.88289e-26
DNAJA1	0.470499	9.84993e-24
SYNE2	0.469838	1.24336e-29
ARID4B	0.468631	7.75325e-28
PDE8A	0.466807	7.29001e-39
SF3A1	0.466492	8.18781e-27
WARS	0.466329	3.97523e-29
INPP5F	0.465357	6.6046e-30
CAPG	0.465064	7.87334e-26
PBXIP1	0.464813	5.32607e-21
WIPF1	0.464731	1.93886e-27
ARHGAP25	0.464615	9.83953e-21
PIM2	0.463461	2.41011e-21
ABCC1	0.463244	9.03494e-36
IKZF1	0.463049	1.96853e-25
CORO1A	0.461805	7.10214e-28
TBL1X	0.461415	2.12718e-33
SLC25A25	0.461338	2.30941e-27
KLF12	0.461305	1.24923e-32
MAML2	0.461116	6.78871e-22
OGA	0.461092	5.03651e-24
STAG1	0.460579	6.87036e-24
AC007384.1	0.46041	3.33603e-23
TRAF5	0.459551	2.46552e-26
MIR155HG	0.459495	4.8285e-24
MYO1D	0.459055	1.1343e-36
PIAS1	0.458205	2.221e-23
OSBPL8	0.455358	3.16149e-21
DYNC1H1	0.455214	8.39787e-23
HCLS1	0.454828	5.74867e-24
DYM	0.454674	1.11686e-30
SND1	0.454593	8.89728e-29
CDK5RAP3	0.454549	2.62934e-25
ITPR1	0.454402	4.70501e-23
CNST	0.454131	4.31001e-30
MTPN	0.454129	1.99405e-26
PHTF2	0.452728	3.78646e-24
MBP	0.452525	1.09457e-22
LIMD2	0.452493	2.71277e-25
PARP15	0.452454	6.76738e-25
CACYBP	0.451006	2.03113e-15
GPCPD1	0.450492	1.36216e-21
RANBP2	0.449991	9.91695e-20
SEPTIN9	0.449899	8.54196e-23
CLEC2B	0.449776	2.9539e-11
PDS5A	0.448038	5.42004e-24
HLA-E	0.447997	4.25578e-56
ODC1	0.447997	1.75266e-20
DIPK1A	0.447553	1.09789e-34
LRCH1	0.447148	1.26922e-31
MORF4L2	0.446615	7.02163e-21
HLA-DOB	0.446258	1.43621e-26
MYCBP2	0.446255	5.09952e-21
SETD5	0.445339	3.71724e-22
BMP2K	0.444908	4.57475e-26
ERCC1	0.444752	3.6559e-25
ATP8A1	0.444207	6.31153e-34
CDKN1A	0.44403	1.52804e-21
LINC01138	0.44373	1.4189e-21
APBB1IP	0.44307	1.58799e-24
NUMB	0.442397	2.78433e-25
ACADVL	0.442197	9.0493e-23
CLASP2	0.441678	3.02962e-29
ARID2	0.440654	1.90052e-22
CCL5	0.43961	1.69388e-21
RPS6KA5	0.439579	2.57156e-27
LARGE1	0.43929	1.2222e-35
SLC23A2	0.439268	3.02283e-31
FAM107B	0.437896	7.86328e-27
RHOA	0.437535	4.65744e-26
P2RY8	0.436926	1.04381e-29
MALT1	0.436698	6.59373e-20
SH3BGRL3	0.436632	4.37698e-32
PLPP5	0.435758	4.2985e-16
RABEP1	0.435145	2.23953e-21
IFITM1	0.434442	1.96739e-17
CDC14A	0.434435	1.51987e-29
ZNFX1	0.433855	2.03148e-29
BLNK	0.432863	2.85779e-29
ABI1	0.431849	1.77248e-20
OXA1L	0.431362	2.96531e-22
TRAF1	0.431327	4.03118e-30
CCR7	0.430377	1.13293e-14
FAM49A	0.430175	2.21601e-18
ERC1	0.429076	1.80033e-29
NUP98	0.428346	1.24982e-20
TRAPPC9	0.428055	6.901e-37
BABAM2	0.427649	2.0582e-24
NFATC1	0.427593	9.40107e-18
DIAPH1	0.427232	6.00405e-22
ZYX	0.427082	7.59545e-23
SYK	0.426693	3.42139e-29
RAB30	0.426537	8.29162e-19
GLUD1	0.426089	1.51216e-24
TPST1	0.42576	2.44544e-34
BCL2	0.425449	4.54278e-17
SIPA1L3	0.423849	9.36068e-22
TKT	0.423727	3.49849e-18
ALOX5	0.423126	2.59614e-33
VOPP1	0.422397	5.02925e-19
HLA-DMB	0.421654	8.06842e-20
SH3KBP1	0.421221	2.76403e-17
ARPC1B	0.421121	8.17258e-26
MAP3K8	0.42013	3.48555e-17
IMMP2L	0.41917	3.06577e-23
CDK17	0.418669	1.08202e-21
RPL8	0.418267	2.15038e-85
RAB3GAP2	0.418231	4.30485e-23
SEC24B	0.417888	2.328e-25
GSK3B	0.417788	2.31707e-26
PPP1R15A	0.417555	3.3887e-21
USP9X	0.41745	9.69152e-22
GNB2	0.416638	1.14043e-19
IFFO2	0.41564	1.6677e-28
PRRC2B	0.415574	5.42748e-22
FMNL1	0.415573	3.43209e-21
NRF1	0.415042	4.12792e-24
PLEC	0.414487	1.09453e-28
TGFB1	0.414042	3.78118e-19
PTDSS1	0.414017	1.25297e-25
FRYL	0.413821	3.14549e-24
MAPK8	0.412865	2.655e-20
PREX1	0.411979	2.35969e-24
DENND5A	0.411932	3.66762e-31
COG5	0.411605	1.08826e-29
SPIDR	0.411514	9.68492e-23
FAM13B	0.411248	1.94078e-19
MS4A1	0.411169	2.84755e-30
WNK1	0.410168	3.05748e-17
PDE4B	0.408985	5.75396e-14
COBLL1	0.407694	3.16836e-16
TAB2	0.407258	6.27084e-22
KHDRBS1	0.407043	5.82136e-17
MAPK1IP1L	0.40664	3.17619e-17
CHCHD10	0.406597	2.01678e-20
EMP3	0.406593	6.36635e-13
FBXW7	0.406496	1.02645e-20
TICAM1	0.40648	9.80058e-23
SLC49A4	0.405754	6.00604e-22
AC079793.1	0.405554	2.0602e-53
DOCK2	0.405054	5.73927e-19
GDI1	0.405023	4.96347e-20
LBH	0.403713	1.15935e-18
SMARCA2	0.403572	3.78332e-19
ARHGAP17	0.403539	4.28113e-23
NEK7	0.403487	4.3724e-19
ATP1A1	0.401885	8.95485e-13
BTAF1	0.401848	6.23106e-21
SERINC1	0.401243	6.52471e-18
PPFIBP2	0.400809	2.36235e-21
CEP120	0.400654	1.85732e-21
IQGAP1	0.400225	9.83697e-19
VPS13B	0.40022	5.72997e-28
SMC6	0.398439	5.46022e-19
SLC44A2	0.398295	6.34923e-20
NFATC3	0.396912	3.12267e-34
ANTXR2	0.396589	1.62792e-29
GAB2	0.396327	4.70422e-23
RAD51B	0.394752	2.78936e-30
ZBTB20	0.394517	4.42933e-14
FBXO11	0.394475	3.47941e-17
CCT4	0.394179	1.52289e-14
TMED8	0.393914	2.03131e-18
FARP2	0.391933	3.98576e-18
FBL	0.391511	7.77774e-18
QKI	0.391508	3.97163e-15
FYN	0.391001	5.57648e-15
EMB	0.390998	1.12082e-22
PRKD2	0.389732	8.15733e-24
HIGD2A	0.389376	4.53612e-20
RAPGEF2	0.38927	1.02138e-22
JAK1	0.389155	9.0999e-25
TNFAIP3	0.389145	1.02718e-18
SEMA7A	0.388729	2.23346e-15
HBP1	0.388362	9.06733e-17
ZEB2	0.387448	1.21287e-11
TEX9	0.386094	1.71159e-15
FCRLA	0.385971	4.4011e-19
HIVEP1	0.38582	4.69685e-14
PGK1	0.385792	6.89015e-18
PTPN22	0.384445	2.15658e-17
AZIN1	0.38418	4.44828e-14
ZFAND2A	0.384174	2.83821e-07
MED13L	0.384146	1.25044e-15
STAT4	0.383819	1.10976e-13
TNKS2	0.383311	6.59265e-18
GPR132	0.38325	2.07022e-16
RAB31	0.383108	3.57027e-16
EIF4G3	0.381718	2.50744e-18
XPR1	0.38149	3.30041e-25
USP47	0.381329	3.06911e-14
TPP1	0.38063	5.73818e-17
PPP2R1A	0.380595	4.43148e-20
MT-ND4L	0.380076	7.36009e-23
RASGRP3	0.378873	5.78518e-18
BIRC6	0.377112	3.17366e-16
TAF4B	0.377102	3.0263e-19
ZNF460	0.376652	2.02932e-21
GBP4	0.376562	2.70625e-18
NIN	0.37656	9.31776e-13
PSME4	0.37651	4.51993e-19
PRKX	0.375855	1.14267e-20
PRPF8	0.375294	1.877e-15
BRD2	0.374753	1.59e-12
AGO2	0.374474	5.6113e-17
NFATC2	0.374208	1.95129e-21
RNF213	0.374059	2.61687e-22
ST8SIA4	0.373876	7.7611e-15
INPP5A	0.373274	4.62245e-13
POLD4	0.372645	1.50812e-22
STAT5B	0.371865	3.00891e-28
SLAMF1	0.371563	7.27764e-12
ATP2A3	0.371545	7.68838e-19
CUL3	0.370755	2.19402e-15
AFF4	0.370509	3.08375e-13
MCU	0.369867	1.74264e-29
LY75	0.36978	1.65587e-19
PRKAR1A	0.369729	1.1747e-12
ATP2C1	0.369605	1.96108e-22
GPHN	0.368944	4.59617e-24
SETX	0.36803	5.35721e-14
IPO7	0.367957	3.6805e-17
NLRP1	0.367613	9.33833e-17
JARID2	0.36743	9.88603e-13
TPD52	0.367163	5.16127e-14
ECE1	0.367044	8.29411e-24
IRF2BPL	0.36634	1.62397e-21
LPP	0.365239	7.49113e-17
AMFR	0.363848	1.06022e-14
JAK3	0.362654	4.60859e-20
ICAM3	0.362579	3.92832e-16
MAP4K5	0.362479	2.3294e-18
PNRC1	0.362476	5.88165e-47
PIK3CA	0.362471	2.72176e-16
ATP5F1B	0.362125	4.53098e-14
AUTS2	0.360669	2.34815e-16
WASF2	0.360432	9.29523e-15
ATXN1	0.360238	4.56047e-12
SLC4A7	0.359395	4.3466e-15
FNBP4	0.359157	1.73321e-14
GNB1	0.359042	2.41625e-13
PLCL2	0.358912	7.6472e-22
EXOC4	0.358833	5.61641e-22
FCMR	0.358441	2.47226e-09
KDM2A	0.358289	5.33745e-13
ZFC3H1	0.357884	2.59173e-12
ANK3	0.35787	9.31153e-23
GNA13	0.357813	3.7358e-09
STIM2	0.357441	9.76171e-13
TAPBP	0.357089	8.23939e-14
SMYD3	0.356977	3.51063e-16
DNAJB4	0.356656	1.1722e-13
PRKACB	0.355663	1.79058e-24
CYFIP2	0.355186	3.69559e-15
MARF1	0.354997	2.21569e-18
FUT8	0.354916	2.44568e-20
TMC8	0.354812	3.82689e-19
EEF1A1	0.354057	1.60608e-65
NIPBL	0.35392	8.95181e-12
REV3L	0.353077	1.18394e-12
JUN	0.352798	1.0731e-16
TESK2	0.352543	4.76784e-18
DNM2	0.35093	1.31564e-18
EIF4B	0.350599	5.37709e-14
GMDS	0.350231	3.87909e-20
PEA15	0.35023	3.55934e-10
RUNX1	0.349666	1.22441e-20
ELMSAN1	0.349628	1.02652e-11
TOX	0.34948	3.67339e-12
CIITA	0.349431	7.7833e-17
ARHGAP4	0.347796	1.06464e-18
ABHD14B	0.346732	1.81008e-14
CD37	0.346638	1.53152e-35
FCRL5	0.346609	3.89037e-14
EIF2S3	0.346086	1.39387e-14
KLF10	0.346039	1.63534e-16
TSC22D2	0.345958	2.60972e-13
IQSEC1	0.345452	4.66737e-12
PARP1	0.345036	1.12502e-10
PIK3R5	0.344265	7.50066e-21
WASHC4	0.34409	2.02911e-14
VPS13C	0.344086	2.70714e-11
HCP5	0.343801	1.73298e-22
PTK2B	0.34357	3.94743e-16
DAAM1	0.342933	4.83808e-14
NR3C1	0.342678	2.3263e-13
EMD	0.342492	2.05845e-11
LNPEP	0.342467	3.12489e-11
NUP153	0.342431	8.84982e-15
TCAF2	0.3424	1.79684e-26
ASH1L	0.342041	3.93266e-11
SGMS1	0.341247	1.09447e-18
NFX1	0.341245	2.08743e-15
WDFY1	0.340836	1.71108e-17
CAPRIN1	0.340319	9.06241e-14
IGHG3	0.34009	0.038882
MT-ND6	0.339908	8.37652e-17
GPI	0.3397	2.90004e-19
HVCN1	0.339695	1.38566e-08
LTA4H	0.339528	4.1675e-14
EFR3A	0.339414	6.30937e-15
PARVG	0.339253	2.72722e-13
CBWD5	0.339185	3.51427e-12
SUCO	0.338209	1.07345e-14
PHC3	0.337658	1.20973e-12
ZFP36	0.337517	1.22036e-11
HNRNPU	0.337483	5.00608e-14
PCED1B	0.335624	2.47339e-17
AGPAT5	0.335593	3.5999e-11
OSBPL9	0.334754	1.59295e-17
PCGF5	0.334481	3.27558e-09
RASSF5	0.334463	8.7468e-12
COP1	0.334321	5.55433e-24
GRAMD1C	0.334182	1.40314e-15
XRN1	0.333902	1.86152e-11
RPS5	0.333703	6.81987e-55
RNF111	0.333622	1.20143e-14
DTNB	0.332987	2.72322e-25
TAF15	0.332588	5.12199e-14
OGDH	0.332572	3.13235e-18
ARHGAP24	0.332463	7.61973e-08
RARA	0.3324	2.00917e-09
KBTBD8	0.332104	1.32212e-10
ARHGEF1	0.332044	1.75689e-14
NCR3	0.331276	6.07983e-21
MKLN1	0.330481	7.56891e-13
TAP2	0.330421	2.18315e-14
FBXL17	0.330301	1.5325e-22
ARHGAP31	0.330201	2.9152e-21
CS	0.330175	3.8976e-16
BEST1	0.329895	1.08061e-26
NFKBIA	0.329027	1.36044e-12
FOXP1	0.328989	2.31244e-08
RASA3	0.328808	1.00211e-18
RSRP1	0.328253	6.25513e-18
PTPN1	0.328	7.14224e-11
TNIP1	0.327552	7.9864e-12
RNF38	0.327268	1.82191e-12
RNGTT	0.326619	1.57159e-14
AC016831.7	0.326315	7.06407e-10
EBLN3P	0.325717	1.41401e-10
CR1	0.325635	4.48642e-22
UBE2E1	0.325492	1.63251e-14
FBXW11	0.32514	5.06456e-11
FAM3C	0.324986	9.1079e-08
FBRS	0.324782	1.6169e-11
PPIA	0.324502	1.81439e-23
OTUD4	0.323843	5.6029e-17
LEMD3	0.323388	2.95347e-17
HSH2D	0.322973	9.77768e-13
LONRF1	0.322595	4.11072e-13
PPP2CA	0.322319	9.65258e-10
OPN3	0.321651	5.00143e-18
EIF3D	0.321627	1.05018e-12
GSTK1	0.320938	4.30769e-11
ACP5	0.3207	7.33739e-17
FAF1	0.32042	4.68804e-13
SETD2	0.320171	3.03226e-09
ATAD2B	0.319932	5.15793e-14
PAF1	0.319359	9.95184e-10
HMGCS1	0.319258	1.073e-11
CDKAL1	0.31881	1.65088e-15
SPPL3	0.318794	5.748e-14
TBXAS1	0.318574	1.42577e-08
SFPQ	0.31833	3.12017e-10
SASH3	0.317469	1.33241e-16
UBE2J1	0.317204	2.04032e-12
DUSP1	0.316938	7.2295e-08
ACAP2	0.316818	2.92186e-09
COMMD10	0.316689	1.35267e-16
WDR1	0.316141	3.92663e-13
SLC7A1	0.315409	9.68599e-16
ITGB7	0.314966	1.33338e-13
ANXA2	0.314368	7.96678e-08
EAF2	0.314128	4.25838e-11
YWHAQ	0.31412	2.09618e-09
ZNF821	0.3141	4.496e-13
LMBRD1	0.313892	3.79481e-09
RPS6KA3	0.313126	4.01961e-10
BRAF	0.312842	7.40156e-08
SLC12A6	0.312795	1.82811e-13
AKAP11	0.312352	1.61208e-13
CBWD2	0.311831	2.62702e-13
EVL	0.311655	3.18653e-14
CD2AP	0.311226	1.77472e-09
SIPA1	0.310999	1.60544e-10
AC079781.5	0.310965	5.38519e-19
SLC25A32	0.310385	9.72232e-13
PAX5	0.310129	8.47824e-11
NDUFV1	0.310053	2.69617e-14
RALY	0.309982	4.74064e-10
EEF1G	0.309479	3.09865e-27
TENT5C	0.309427	4.25135e-07
PHIP	0.309348	9.19353e-08
RAB4B	0.308556	4.18554e-14
GIT2	0.308469	4.95079e-13
RLF	0.307866	3.66054e-09
EHMT1	0.30769	2.41492e-08
ARHGAP30	0.307565	4.90642e-11
ATP5MC2	0.307546	3.91484e-15
CAPZB	0.307362	4.21292e-09
RAB3GAP1	0.307331	1.61571e-09
STK40	0.307219	1.47638e-17
KAT6A	0.306433	1.18523e-08
ROCK1	0.306328	8.50302e-09
SLC9A7	0.30584	5.41812e-18
VAT1	0.305802	6.44375e-13
UMAD1	0.305776	9.90618e-19
RACK1	0.305548	5.7461e-40
BAZ2A	0.305419	5.07868e-08
TTC7A	0.304943	1.36818e-12
WHAMM	0.304478	5.13538e-09
CHD1	0.304356	1.73433e-08
DEF6	0.303574	5.94907e-16
PPTC7	0.303397	7.52629e-11
AKNA	0.303288	2.62082e-14
THRAP3	0.303026	2.94708e-09
GBF1	0.303026	2.02559e-17
ARHGEF2	0.302763	4.7385e-14
PARVB	0.302662	1.60125e-07
TTC17	0.302305	1.13967e-11
MRPL18	0.302156	7.98386e-07
FAM172A	0.301813	1.45815e-16
PPP6R3	0.301697	2.23997e-09
SARAF	0.301557	7.73802e-14
HIPK2	0.301382	0.00100829
KDM2B	0.301321	1.14785e-07
OXSR1	0.300607	9.08189e-12
NT5E	0.299924	1.58044e-16
CLASP1	0.299871	7.83408e-19
POLR2A	0.299485	5.85244e-07
ADAM19	0.299362	1.98183e-15
HIP1R	0.299114	6.89797e-10
RASGRP1	0.298373	1.63604e-13
TPM3	0.298347	1.04244e-13
NCOR2	0.297694	2.94747e-16
SESN1	0.297466	1.85315e-14
ZNF581	0.297183	4.61225e-08
TUBA1A	0.297167	1.46739e-05
MYO1G	0.297142	8.16381e-08
GMIP	0.296865	1.02017e-11
STK38	0.296794	2.92512e-13
SGPP1	0.296253	1.19409e-08
BCL3	0.295783	1.50482e-07
PRRC2A	0.295766	1.35886e-13
TRIM26	0.295663	1.36186e-10
POU2F1	0.295559	3.9675e-11
TTN	0.295558	8.66595e-05
LARP4B	0.295398	1.64171e-11
KAT6B	0.29512	6.0465e-11
DCAF6	0.295085	2.0657e-15
PLP2	0.294688	6.41867e-06
DNAJC4	0.294501	9.72113e-11
ZNF267	0.29417	1.06749e-07
RANBP9	0.294016	1.36809e-13
SDHA	0.293957	3.70672e-10
PPP6R1	0.293793	1.70533e-11
RB1	0.293626	1.72556e-07
IGLC1	0.293395	2.38338e-13
INPP5D	0.292966	3.62969e-07
MANBA	0.292964	3.8955e-06
MAP3K2	0.292477	2.64078e-07
CLTC	0.292449	1.04797e-10
ARF5	0.292282	3.8215e-09
TGIF2	0.292179	1.71658e-08
PTBP3	0.291345	4.94275e-08
TRAF3	0.291291	2.54382e-07
HIST1H1E	0.291256	4.41142e-18
BBC3	0.291067	7.99765e-08
ITCH	0.290754	1.38101e-09
TRBC2	0.290477	4.2437e-07
NAA50	0.290223	1.04847e-07
USP10	0.289687	2.11871e-07
HLA-DRA	0.289422	9.53799e-53
ELF2	0.289392	3.05288e-07
STIM1	0.289085	2.40193e-17
FBXO34	0.288642	1.05872e-08
GNG7	0.28856	9.41885e-07
MHENCR	0.288327	8.44404e-16
MAN1A1	0.288266	1.63939e-12
RRAS2	0.287984	4.90855e-08
MIOS	0.287694	2.00286e-08
AFF1	0.287387	2.14426e-09
UBQLN1	0.286909	2.36999e-06
MAP3K14	0.286668	2.7419e-16
PPP2R5A	0.286015	1.01002e-14
PICALM	0.285865	2.18626e-10
ATP6V1A	0.285829	2.67263e-14
IVNS1ABP	0.285572	5.93787e-09
AC092821.3	0.285276	5.01852e-06
ARFGEF2	0.284871	1.01049e-10
ZBTB11	0.284712	5.55748e-10
ENTPD4	0.284537	1.9308e-13
NPC1	0.284459	3.33607e-14
PXK	0.284303	1.52312e-08
SCAF4	0.28429	3.19653e-13
ENO1	0.284161	7.08621e-06
TAP1	0.284099	5.74576e-07
CPSF6	0.283957	1.14648e-09
CDKN1B	0.28395	2.08244e-07
ACAP1	0.283783	5.95888e-08
RPS9	0.283634	9.30652e-33
PLAAT4	0.283462	7.99871e-09
TRIP12	0.283386	2.60337e-08
AP3B1	0.283189	2.19603e-11
C5orf56	0.282715	2.62574e-09
TMX4	0.282126	1.58369e-06
GGA2	0.282105	3.33859e-07
CD22	0.281976	2.39748e-06
AHR	0.281285	4.98451e-08
RBM14	0.281235	4.52261e-12
CRTC3	0.281198	6.7133e-13
FOXO3	0.281095	8.68562e-14
AC093010.2	0.281089	3.99332e-10
PTPN6	0.28075	3.24083e-15
OSBPL3	0.280646	3.00252e-11
PAG1	0.280529	6.42471e-07
SUN2	0.280278	8.49925e-09
KDM7A	0.279564	3.353e-11
DNAJB6	0.279497	2.42926e-09
CYSLTR1	0.278736	8.44019e-13
TASOR2	0.2787	6.54832e-08
STX12	0.278319	1.11266e-07
CCDC18-AS1	0.278132	1.17312e-11
EIF3F	0.278114	4.51781e-11
CD24	0.278043	0.00107759
RPN1	0.277811	1.1128e-08
IGHG2	0.277611	1.33575e-15
PPP3CA	0.277561	5.7826e-05
CD79A	0.277284	2.28903e-07
NSMAF	0.277151	6.233e-12
ABCG1	0.277143	5.50719e-09
CAB39	0.277062	5.05886e-09
MFSD14A	0.276801	2.99405e-10
NCOA2	0.276647	1.2147e-11
UBA1	0.276461	6.03701e-10
GLCCI1	0.276203	1.16879e-15
DNAJC1	0.275975	2.32075e-06
UBE3A	0.275472	8.37674e-09
RAB24	0.275419	2.7127e-11
CHD9	0.275295	5.16776e-08
TBC1D9	0.275244	2.85282e-10
WEE1	0.275054	0.000271018
TFEB	0.273936	9.18376e-07
COPA	0.27345	3.57556e-07
SPG11	0.27338	4.59633e-12
STX7	0.273091	8.7126e-05
SSR4	0.273001	2.15012e-08
NUDT3	0.272956	4.50401e-12
TET2	0.272785	7.33292e-09
FGD2	0.272511	5.8998e-09
LYST	0.272431	7.65141e-07
ASAP1	0.272386	4.94629e-09
MAPK1	0.272236	4.56714e-07
SMURF1	0.272178	1.75972e-18
RAB6A	0.272153	8.95412e-10
FNDC3A	0.271468	3.21351e-10
NIBAN1	0.271016	8.45378e-11
CEP85L	0.270871	2.8531e-11
TRPC4AP	0.270861	1.06631e-10
NEK6	0.270685	2.18599e-09
IDH2	0.27023	2.17644e-09
DCTN4	0.269853	1.92959e-10
SCLT1	0.269318	3.96586e-11
ITPR3	0.268625	1.00328e-12
FAM135A	0.268192	3.81429e-11
GNAI2	0.268059	4.24014e-07
MDN1	0.267878	7.95661e-12
RALGDS	0.267855	8.45638e-11
SNRK	0.267758	1.0522e-09
MARK3	0.267728	3.93629e-08
BICD1	0.267591	1.72041e-15
BTK	0.26739	4.20408e-08
CFL1	0.267005	1.38023e-10
TTC19	0.266872	8.72766e-07
CCDC88B	0.266006	6.02189e-14
USP32	0.265964	7.74924e-12
MAD1L1	0.265844	1.27494e-12
MAP3K5	0.265724	1.85683e-14
MTR	0.265723	5.45095e-11
EGLN2	0.264702	3.78104e-06
YWHAG	0.264678	4.57827e-08
TP53BP2	0.264327	8.39411e-07
TNKS	0.264191	1.99039e-12
NEDD9	0.263637	7.02393e-15
BLK	0.263393	2.44862e-07
KPNA1	0.262902	3.8456e-09
ALCAM	0.26285	3.80313e-08
TSPO	0.262726	2.82531e-08
SNRPA	0.262415	3.2907e-10
AP2B1	0.262389	1.20295e-08
CGAS	0.261995	1.36576e-08
NCF4	0.261863	0.000316623
PTGES3	0.261577	3.18902e-05
RHBDD1	0.26079	1.66064e-07
DOCK11	0.260726	1.03567e-07
GOLGB1	0.260255	4.99737e-05
SAMD12	0.26012	1.16948e-12
KIF13B	0.26007	1.09296e-13
IGHA1	0.259777	1.42768e-08
PFN1	0.258372	5.34606e-18
FAM214A	0.258214	6.16024e-05
PPP1R18	0.258131	5.30056e-06
CD27	0.258079	2.48046e-06
E2F5	0.25804	1.53256e-06
PTOV1	0.257612	6.25324e-05
TACC1	0.25742	0.000577708
RNF138	0.257407	5.92088e-06
GRK3	0.257197	4.66601e-06
ZNF644	0.257143	0.000683482
RNF149	0.257114	2.98189e-05
CDK13	0.257102	1.8387e-06
TXNDC11	0.256951	5.18313e-08
CXXC5	0.256157	9.62391e-07
SRGAP2	0.255985	2.25996e-05
RNF10	0.255957	5.01276e-05
TRIM28	0.255828	3.92837e-06
ITPR2	0.255618	3.09552e-06
AL133259.1	0.255501	0.000262259
POM121	0.255322	2.98579e-10
ZDHHC20	0.255066	2.76436e-06
CASK	0.254992	6.61265e-11
HIST1H1D	0.254957	1.51631e-08
ARHGAP26	0.254826	3.27422e-11
BDP1	0.254352	0.000155005
LRCH3	0.253844	7.8474e-07
ARID1B	0.253611	0.000275054
TECR	0.253583	8.74437e-05
CAPNS1	0.253515	3.05672e-08
VRK2	0.253347	1.21019e-08
TIAM2	0.253053	4.48352e-07
SF3A2	0.253036	9.21324e-06
SRPK1	0.252761	2.73623e-06
UBR1	0.252711	4.10778e-08
ITGB1	0.252246	0.000137465
RAB5B	0.252168	2.97683e-11
HTT	0.252089	1.15734e-08
NOTCH2	0.251869	9.61304e-10
TOR1AIP1	0.251774	1.83553e-10
APP	0.251573	8.60428e-07
FOXK1	0.251414	8.37315e-08
TUT4	0.251299	5.58576e-05
GNA12	0.251148	2.5141e-07
GLG1	0.25075	2.22654e-06
NAP1L4	0.250128	1.41059e-08
KMT2A	0.2497	7.26881e-05
ECD	0.249184	2.42414e-08
DENND4C	0.249004	5.76221e-13
PHKB	0.248727	5.85322e-10
RABEP2	0.24856	9.35712e-09
MON2	0.248071	4.54141e-10
MBD5	0.248036	4.80676e-09
PIK3R1	0.247689	3.08169e-06
IL2RG	0.247594	2.45765e-06
PRKCD	0.247196	1.20927e-06
BAIAP3	0.247093	0.00146055
IRF5	0.246977	2.73745e-07
ARID5A	0.246891	0.000682631
WAS	0.246819	7.838e-08
EIF4G2	0.246548	5.40992e-06
ILF3	0.246422	1.04294e-05
SMCHD1	0.246249	3.52203e-07
TNFAIP8	0.245947	4.03798e-07
NSD2	0.24579	1.44544e-09
SPTLC2	0.244943	1.09333e-08
ARHGEF7	0.244919	1.92023e-08
NCOR1	0.24481	6.7588e-05
CNTRL	0.244522	7.91185e-05
ANKRD17	0.244427	5.13647e-09
PHYKPL	0.243655	1.61984e-07
PDK3	0.24335	9.06325e-10
TBL1XR1	0.243217	9.65072e-05
TTC39C	0.242896	2.42589e-05
FLOT2	0.242825	1.0796e-07
PCNX1	0.242634	1.31499e-05
C12orf57	0.242616	2.94947e-05
CYBB	0.242075	4.68448e-05
CSK	0.241876	6.81435e-13
STAT6	0.241752	4.11711e-05
SECISBP2L	0.241686	0.000372507
CCDC91	0.241042	0.000249727
TAOK3	0.240581	7.36783e-05
P4HA1	0.240525	0.00183578
CERT1	0.240481	2.86775e-06
TCIRG1	0.240387	4.77526e-09
HNRNPUL2	0.240365	6.49636e-06
SOS1	0.240189	4.02265e-09
LRPPRC	0.240128	1.79954e-06
AUP1	0.239995	0.000266219
UBAP1	0.239702	1.12544e-06
RPL3	0.239097	1.9678e-24
SQSTM1	0.238969	0.000129972
SLC37A1	0.23889	6.00253e-06
PPP1R12A	0.238672	3.60986e-06
RHOG	0.238515	0.00108432
CRTAP	0.238234	4.67621e-07
STX5	0.238004	0.00050607
RTN4	0.237989	8.1811e-05
CD52	0.237958	6.36637e-05
PRDM2	0.237516	0.000109913
NUCB1	0.237294	2.29531e-08
WDFY2	0.237274	8.77941e-10
RHOF	0.237182	0.000246358
POC1B	0.236907	1.89423e-05
PARP14	0.236666	8.74047e-05
PIK3CD	0.236221	2.1485e-13
HP1BP3	0.23608	0.000254087
ANXA11	0.235529	7.26942e-08
HLA-DMA	0.235318	1.85271e-06
MAP4K1	0.235149	9.37814e-10
FAM117B	0.235095	3.51393e-10
BOD1L1	0.235078	0.00216313
DHX15	0.234917	5.56314e-05
USP25	0.234748	2.64204e-10
MTG1	0.23448	6.21844e-10
MAP4K2	0.233964	1.67476e-05
KMT2E	0.233727	1.926e-05
TUBA1C	0.233413	0.000339198
GCH1	0.233383	0.00695583
ATP5PB	0.233313	0.000169132
COPB2	0.233275	8.48537e-07
NLRC5	0.232818	2.21436e-08
XPC	0.232662	6.77427e-11
UHRF2	0.232258	0.000245594
SNAP23	0.232165	0.0360581
LAT2	0.231808	0.00235575
GPR174	0.231735	1.7603e-08
IGF2R	0.231651	1.86211e-08
ANKHD1	0.23159	0.00229956
STT3B	0.231307	3.22167e-08
CD79B	0.231055	3.01039e-06
BORCS5	0.230806	0.00128011
PTEN	0.230796	8.53414e-06
BST2	0.230186	6.17106e-07
IPMK	0.23001	2.4927e-08
ARHGAP9	0.229969	1.12719e-05
PTBP2	0.229721	7.40083e-06
RAB11FIP1	0.229622	0.00509401
2024-03-08	0.22958	4.58094e-05
SRRM2	0.229113	8.3861e-09
CD81	0.228951	0.0133339
AP1G2	0.228505	1.2399e-07
RBMS1	0.228465	5.85754e-09
CELF2	0.228411	0.000302893
BLCAP	0.228391	4.68971e-07
SNRNP200	0.228347	0.00344038
CCAR1	0.228068	1.00627e-05
KIF2A	0.227966	0.000439811
CDK16	0.227582	2.75413e-06
CAPN2	0.227356	1.18985e-05
ERF	0.227254	0.000871448
LFNG	0.227206	1.91206e-06
MCOLN2	0.227156	0.000796752
PLEKHG2	0.226863	4.64984e-10
MVP	0.226575	1.83988e-06
SUPT6H	0.226537	1.02537e-06
NUP88	0.226473	8.86973e-06
FBXO33	0.226211	3.86028e-06
ZMIZ2	0.226146	8.61548e-05
RPS14	0.225995	1.4694e-24
IPO5	0.225787	2.46564e-07
HIST1H4C	0.225584	0.00904004
ZNF24	0.225131	6.47344e-05
EPB41L2	0.224836	0.000492463
TBRG1	0.224622	0.000721079
HSPA9	0.224578	0.00177405
NUAK2	0.224346	1.84632e-07
GNB5	0.224126	0.00168586
APRT	0.223847	1.68656e-07
AFDN	0.223763	0.00136045
PCM1	0.223747	0.00171847
EIF5A	0.223707	2.45487e-05
TXNDC5	0.2237	6.57561e-06
CANX	0.223613	0.00128565
MAP7D1	0.223608	3.98545e-06
CNPY3	0.223574	0.00456418
GRB2	0.223401	0.00254467
CALM3	0.223301	0.000680639
HDAC7	0.223222	7.15174e-06
NME2	0.222953	4.90205e-08
NUP210	0.222618	0.000584261
RC3H1	0.22242	0.000666489
CLIC1	0.222096	6.71938e-06
RBL2	0.22203	1.10552e-09
NCKAP1L	0.221989	3.59323e-08
AHCY	0.22192	4.94048e-07
NR1H2	0.221911	0.00457493
RASAL3	0.221855	9.41453e-07
EIF5	0.221251	0.000421175
MPP6	0.2211	5.50532e-05
QRICH1	0.221	9.42562e-08
TRAF3IP3	0.220891	8.051e-07
CUX1	0.220572	0.000131318
RAD23B	0.220569	0.000164367
ACTN4	0.220318	4.73552e-05
SP110	0.220256	0.00200461
SYTL1	0.219909	6.63451e-08
ZFR	0.219654	6.68522e-06
TNFRSF10B	0.219606	0.000542307
PSEN1	0.219226	1.36478e-05
TMEM238	0.219097	1.70864e-06
GPBP1L1	0.218134	0.00144731
PCIF1	0.21781	0.000571353
ECPAS	0.217764	5.95515e-08
SUCLG2	0.217749	1.22697e-07
DNAJC10	0.21753	6.9354e-05
SLC25A1	0.217458	2.91747e-07
SEPTIN1	0.217397	0.00097116
DCAF8	0.217301	0.000209528
BZW2	0.21724	4.68434e-07
DELE1	0.215685	2.68746e-07
XPO6	0.215498	1.34594e-06
POLK	0.21532	7.79194e-05
CNPPD1	0.215294	0.0248623
EEA1	0.214753	0.00084338
LPIN2	0.214671	1.22632e-05
DDAH2	0.214654	0.0378818
MAN2B1	0.214625	4.59778e-11
GALNT10	0.214517	1.32827e-06
DNPH1	0.214348	1.37729e-10
PPM1B	0.214124	1.78466e-05
KDM3B	0.214095	5.21277e-07
CTSA	0.214085	1.35039e-05
VASP	0.213967	0.014613
MEF2D	0.213946	0.00127182
PHF21A	0.2138	7.51674e-05
C16orf72	0.213713	0.00111234
SEC31A	0.213607	0.000452371
SNX13	0.213525	3.66888e-05
STARD7	0.213357	0.00060754
ENTPD1	0.213355	5.31046e-05
STAT3	0.213351	0.00938618
SPI1	0.213332	1.16569e-13
TNPO3	0.213231	1.47536e-06
TM9SF2	0.213085	0.00157904
DCAF5	0.213084	2.68754e-05
CSNK2B	0.213046	0.0128634
SH3BGRL	0.211888	0.00158198
C1GALT1	0.211623	0.000426276
SNX1	0.211555	4.21043e-06
SMAD2	0.211428	2.74523e-05
LINC01588	0.211426	3.81837e-05
HIPK3	0.211236	1.02351e-06
NOP58	0.211149	0.0204754
FAAP20	0.211017	1.69505e-05
SECISBP2	0.210315	0.0014079
ERGIC3	0.209668	0.000815209
BBX	0.209624	0.00128425
ZNF800	0.209581	0.00234995
RUFY3	0.209489	6.30659e-06
OPA1	0.20936	1.34254e-06
LDB1	0.209122	1.02768e-07
EFHD2	0.208988	0.000359027
NPAT	0.208123	0.0472992
UBE2Q2	0.207621	0.000677544
HECA	0.207593	0.0145847
SYTL3	0.207582	0.0023038
RABGAP1	0.207569	9.58288e-05
SHISAL2A	0.207323	0.000757165
ARPC4	0.207296	0.00701199
ENSA	0.207015	0.00607762
HMBOX1	0.206875	3.48815e-06
KIAA0232	0.206865	0.000178953
ACIN1	0.206823	0.00830456
RICTOR	0.206696	0.00171905
TAF10	0.206618	0.000838374
GRK6	0.20652	0.0118357
CSDE1	0.206055	0.00786475
SIN3A	0.205974	0.00311306
BNIP3L	0.205616	0.0124579
RPN2	0.205523	0.000802388
CCM2	0.205492	0.000261934
CUL1	0.205256	2.26152e-07
SHMT2	0.205102	0.000205698
GTF2I	0.204769	0.00346076
ANKRD37	0.204386	0.000871954
NUP58	0.204353	0.00500474
ZC3H12D	0.20413	2.14217e-06
ELK3	0.204054	1.37121e-05
SPOPL	0.203964	0.00183917
RAB1B	0.20386	0.000201112
ST3GAL1	0.203702	8.84718e-07
CYB5R3	0.2036	0.0134883
ATP9B	0.202418	5.76275e-05
GAK	0.20229	1.35892e-05
HOOK3	0.201837	0.00172961
INTS10	0.201623	4.95725e-05
MAP3K1	0.201369	0.0328496
RPS2	0.200994	1.17515e-23
SCRN1	0.200901	0.0233369
DENND3	0.200756	0.0014964
GSE1	0.200634	3.24852e-07
SOS2	0.200481	0.00557851
SUN1	0.200419	4.79962e-05
LY86	0.200417	0.000981764
PCED1B-AS1	0.200263	9.52194e-05
AGTPBP1	0.20025	0.00288786
TP53BP1	0.200073	1.72778e-06
CRLF3	0.199654	0.0271178
PML	0.199347	1.25546e-06
SMG1	0.199252	0.0141638
DDOST	0.198603	0.00121268
ACSL1	0.198432	0.0226823
ZBTB43	0.198378	4.02589e-05
CCS	0.198297	0.00257957
UFL1	0.198066	1.00753e-06
UBTF	0.197939	0.000149296
TRIM27	0.197762	0.00010557
GRINA	0.197573	6.28182e-05
ERCC5	0.197535	6.4421e-09
ARFGEF1	0.196935	0.00358797
CNOT8	0.196864	0.0018393
NF1	0.196763	0.00366527
YY1AP1	0.196682	0.00232926
MAT2B	0.196529	0.0456761
ASCC3	0.196386	0.000441716
HK1	0.196174	0.000194613
EIF3A	0.19599	0.0118578
KCNN4	0.195969	0.00505317
SCAF8	0.195823	8.3664e-05
HADHA	0.19568	0.0434901
NKRF	0.19558	8.30807e-06
DAP3	0.195303	0.00607853
SLMAP	0.195092	3.97915e-05
CUL4A	0.194255	0.000611446
IFT57	0.193484	0.00557673
RAB11B	0.193447	0.00531396
GRK2	0.193388	0.000423421
HECTD1	0.193387	0.00376897
TPP2	0.193265	0.0057436
SIDT1	0.193081	9.8778e-05
GOLPH3	0.19274	0.0107303
SNX10	0.192733	0.0464603
MTA2	0.192665	0.000216964
CEP95	0.192326	0.0343051
FAM117A	0.19227	0.00466006
UBAP2L	0.19227	0.00385847
NFKBIE	0.191824	7.78495e-06
ANAPC5	0.191452	0.00064016
STXBP2	0.191024	0.00408454
ZDHHC14	0.190945	0.00598616
ZSCAN18	0.190525	0.000510392
NUMA1	0.190382	0.00332114
CDC37	0.190248	0.00195882
FIS1	0.190074	0.000146827
PUM1	0.19003	0.0452984
SHISA5	0.189839	0.00294432
PATL1	0.189744	0.00173809
BTG2	0.189722	0.0298838
PRPF39	0.189182	0.000214691
KCTD20	0.18899	0.00807113
HNRNPH2	0.188981	0.0480428
ANKRD28	0.188975	7.63607e-05
KBTBD2	0.188909	0.0144352
SH2B3	0.188717	0.0347848
SGSM3	0.188653	9.41785e-05
BCAS4	0.188362	0.000622972
POM121C	0.188324	0.000296746
FOXK2	0.188044	0.00766176
TMEM87A	0.187945	0.0015184
SMURF2	0.187858	0.00198207
CREBBP	0.186974	0.0147233
SMAD4	0.186809	0.00634821
RHOH	0.186609	0.00338666
KLHL18	0.186564	0.000136357
MAN1A2	0.186383	0.000466815
TRIM33	0.186187	0.00893741
USP37	0.186094	0.0317522
SAMD4B	0.184954	0.016686
KIAA1109	0.184547	0.000761503
HERC4	0.183959	0.000458444
CEP83	0.18364	0.00113777
GNAS	0.18358	5.20329e-07
TOP2B	0.18305	0.00352029
NDRG1	0.183039	0.00111412
MAPKAP1	0.182991	1.01043e-06
PNOC	0.182747	5.94284e-06
RPL28	0.182522	5.75412e-28
RELT	0.181999	0.000855014
SPECC1L	0.181536	0.00753331
SYVN1	0.181503	0.000864147
ILK	0.181331	0.0276483
ADAM8	0.181277	0.00162423
RNF4	0.180864	0.0230307
DGKA	0.180674	0.00234611
SNRPD2	0.17999	0.0366885
KDM3A	0.179453	0.00140738
FAM53B	0.179342	0.000305085
AC017104.1	0.179086	2.79782e-05
MSL2	0.178975	0.0263247
HPS5	0.178141	0.0462256
HLA-DQB1	0.176945	1.22278e-11
PCBP1-AS1	0.176944	0.00654465
GAPT	0.176787	1.70191e-08
NDEL1	0.176714	0.00151792
SRGAP2B	0.176425	0.0126057
AMPD3	0.176361	0.000889692
CCNT2	0.176322	0.00311113
SNX2	0.175813	0.00103569
AGO3	0.17487	0.00082927
PSMB8	0.174625	0.00587909
MED15	0.174526	0.0179668
RAP1GDS1	0.173806	0.0103082
ATP5F1D	0.173615	0.0117053
RPL29	0.173469	8.23584e-18
HCFC1R1	0.173355	0.00840422
ADD3	0.173189	0.0230429
U2AF1	0.17253	0.000823762
NAA16	0.172239	0.000966383
RNF11	0.172094	0.0440286
CLIP1	0.171857	0.00257994
RPL13	0.171115	1.6338e-15
HPS1	0.17101	0.0375317
PACSIN2	0.170274	0.00996437
MCUB	0.169717	0.0196576
RCOR1	0.169388	0.0449486
KLF6	0.169212	0.000435544
AP1G1	0.168384	0.0305425
HLA-B	0.168337	4.91426e-06
RSRC1	0.168333	0.0276363
RPS18	0.167978	4.84325e-08
PFKL	0.167766	0.000387588
VPS36	0.166859	0.00402734
MEX3C	0.16576	0.00564831
CYB561A3	0.163982	0.00420243
HDLBP	0.163836	0.00110066
FAM53C	0.161659	0.0239238
SLC25A39	0.16147	0.0245249
PLEK	0.161439	1.29315e-05
COA1	0.161167	0.00968627
RRM2B	0.161161	0.0233248
BIN2	0.160123	0.00968063
CHMP7	0.158967	0.00387161
CDK19	0.158476	0.00441931
ABRACL	0.158321	0.0387903
PBRM1	0.15762	0.0471762
SLC25A6	0.155019	0.0260783
SMG7	0.154779	0.0295823
RPL10	0.154052	4.82684e-09
ANKRD36C	0.15393	0.0166514
MICAL1	0.153868	0.0266253
CHKB	0.153064	0.000101442
DDHD1	0.152995	0.00266701
RPL7A	0.152351	3.42629e-08
IFNAR2	0.150964	0.0145779
RPS4X	0.150521	3.72276e-09
ZFP36L2	-0.152055	6.22295e-12
POLR2C	-0.152238	0.0385006
BUD23	-0.1556	0.0212022
TTF1	-0.156498	0.0413603
FKBP3	-0.156533	0.00270078
RPS24	-0.16048	7.12232e-11
BLOC1S6	-0.160922	0.0444568
MZT1	-0.162103	0.00726294
RPS13	-0.16506	1.32851e-15
IMPA1	-0.165677	0.00798954
TMEM167A	-0.166044	0.0257164
GTF2A2	-0.167813	0.0278429
AL627171.1	-0.168136	0.0347826
POLR2F	-0.168575	0.00135918
RPL27A	-0.169203	3.52223e-23
IER3IP1	-0.170017	0.0415431
U62317.4	-0.170573	0.0436042
POLR2H	-0.170631	0.0104521
PSMD8	-0.171791	0.0362541
INSIG2	-0.173637	0.0365832
CWC22	-0.174447	0.00363149
TMEM248	-0.174665	0.00752014
NARS	-0.175078	0.00210143
DCK	-0.17623	0.0104712
MRPL36	-0.176416	0.0101028
PSMD9	-0.176579	0.0491713
TMEM160	-0.17663	0.00861975
ERGIC2	-0.17692	0.00049901
COA4	-0.177157	0.000161414
RPS19	-0.177505	7.91342e-12
OIP5-AS1	-0.177847	0.00179751
PTTG1	-0.178271	0.0319204
TTC1	-0.17854	9.60519e-06
ATXN7L3B	-0.178781	0.0233436
KRCC1	-0.179089	0.00343033
NPM1	-0.181377	7.4583e-08
RPL27	-0.181734	2.61933e-13
TBC1D15	-0.182669	0.021379
RPS7	-0.182893	5.62108e-15
TCEAL4	-0.184329	0.0110621
NCBP2	-0.185094	0.0112631
A1BG	-0.18605	0.00124103
BAG5	-0.187247	0.00765451
RCSD1	-0.187433	0.0312076
NDUFA2	-0.18786	0.0016721
SFT2D1	-0.190146	0.00194558
MX2	-0.190266	0.0104827
YAF2	-0.190632	0.00833963
PSMB6	-0.191798	0.0146827
SMU1	-0.192333	0.0271827
IAH1	-0.192517	0.0258308
SRSF9	-0.192745	0.00635782
IMP3	-0.193408	0.000997474
SLC39A3	-0.194301	7.1601e-10
TMEM38B	-0.195043	0.0135667
DNAJB14	-0.195056	0.0360219
SUPV3L1	-0.195273	0.000366926
SDHB	-0.195733	7.79248e-06
TMED2	-0.195978	4.44737e-06
ERH	-0.196342	0.00337856
FKBP11	-0.196363	0.000279622
CISD2	-0.197881	0.0250365
MED6	-0.198852	2.61259e-05
NEAT1	-0.199267	1.65125e-27
MYL6	-0.200128	3.99467e-07
RBM39	-0.200559	9.19455e-06
EXOSC6	-0.200742	0.00146349
ZBTB1	-0.201695	0.00360558
RPS15A	-0.202707	9.2266e-25
MTERF4	-0.203316	0.000374724
MIR29B2CHG	-0.204564	0.00536589
CHMP2B	-0.204795	0.0114761
LLPH	-0.204973	9.4009e-06
BLOC1S2	-0.205809	0.0488977
RBX1	-0.206044	0.034552
CYB5A	-0.206366	0.0125872
TNFRSF13C	-0.206641	0.00016678
UBXN1	-0.206721	0.00052532
PNN	-0.206889	0.0152307
TMCO1	-0.207157	1.7017e-05
AC016831.1	-0.208088	0.00162534
BRD7	-0.208591	0.00105963
GAS5	-0.209294	8.17511e-13
HNRNPA1	-0.209569	2.15194e-10
TMEM123	-0.209959	0.0451712
PSMD7	-0.21025	0.000535742
KDELR2	-0.21064	0.000394142
TMEM243	-0.21364	0.0317627
COQ7	-0.21469	0.00732391
RAB9A	-0.215023	0.00179272
C16orf87	-0.216333	0.000134108
MRPL47	-0.21677	4.97785e-08
RPL30	-0.216946	6.96854e-35
SPCS1	-0.217307	0.0164133
SMIM26	-0.217401	0.00176198
RBMX	-0.217866	4.9429e-06
AURKAIP1	-0.219079	3.7706e-06
AC104024.1	-0.219125	0.000183613
CLTA	-0.219501	3.94723e-05
DRAM2	-0.219585	0.00260629
ALG13	-0.219945	0.00613264
CCNH	-0.219956	2.24639e-05
PPP1R10	-0.220332	3.13194e-06
SERBP1	-0.220786	0.000200454
TIPARP	-0.220976	0.000239269
POLR1D	-0.221609	0.00500532
TIAL1	-0.222131	0.00011906
PCNP	-0.222473	0.000307031
PFDN4	-0.222796	1.30876e-09
MOB2	-0.222816	4.8079e-12
ARL14EP	-0.222823	0.010626
THAP9-AS1	-0.223495	4.82306e-08
LSM5	-0.223653	7.42721e-05
CEBPZ	-0.224198	0.0010381
FAU	-0.22489	8.41164e-36
NAP1L1	-0.225041	1.01632e-05
ANKRD49	-0.225847	1.70717e-09
SNRPD1	-0.226233	8.29887e-06
RANBP1	-0.226599	0.000994233
RPL11	-0.226622	4.72202e-35
LITAF	-0.22663	0.00257048
NOP56	-0.226915	1.17869e-05
CSKMT	-0.227229	0.00448397
MGST3	-0.227935	3.17325e-05
AL021155.5	-0.228053	0.000117249
SMNDC1	-0.228386	5.21176e-05
YY1	-0.228568	0.00428473
COX16	-0.228575	0.000165514
PPIG	-0.22896	0.001196
ZNF331	-0.229056	4.97338e-07
TMEM126B	-0.230037	1.50283e-10
C1D	-0.23105	5.38094e-07
SNRPE	-0.231348	1.46049e-05
LSM3	-0.231719	4.14092e-06
ING3	-0.232118	2.26318e-08
UBE2D3	-0.232886	2.8357e-07
AP1S3	-0.232906	0.000284644
EIF3J	-0.232922	2.55877e-05
MED4	-0.233102	1.46864e-05
UBE2V1	-0.233833	0.00128626
CFDP1	-0.235142	5.54697e-05
FRG1	-0.235468	2.57804e-05
UBE2L3	-0.236405	1.02982e-05
HNRNPA3	-0.2365	1.11794e-06
PNISR	-0.236917	2.49333e-06
MANF	-0.236971	5.35541e-09
PSMC6	-0.237392	3.77963e-05
VBP1	-0.238108	1.06964e-12
C7orf50	-0.238809	0.00106579
RTRAF	-0.239928	0.00014451
PRDM1	-0.240028	7.24817e-10
CHMP4A	-0.240341	1.61526e-06
DYNLRB1	-0.240916	4.61094e-07
MRPL57	-0.241097	1.39505e-05
RPLP2	-0.241979	4.89636e-25
LRPAP1	-0.242063	1.21099e-08
SNRPF	-0.243089	0.000123474
R3HDM2	-0.243243	1.15561e-05
OTUD1	-0.243351	0.000100637
STK17A	-0.243655	1.54755e-05
CAPZA2	-0.244312	1.66973e-05
MPLKIP	-0.246199	7.04384e-07
SARS	-0.246285	0.000178593
METAP2	-0.246338	9.55589e-07
AC245297.3	-0.248071	2.01981e-06
IK	-0.248228	2.02662e-05
ISCU	-0.248932	3.34492e-06
RBM17	-0.249171	0.000396178
RPL6	-0.25015	4.87109e-19
TRIR	-0.250151	1.2774e-08
ARPC3	-0.251087	1.36999e-08
RPL5	-0.251777	8.67972e-24
CIRBP	-0.251899	1.86913e-05
AK6	-0.253188	3.02809e-09
COMMD2	-0.255432	5.76041e-11
COMMD6	-0.255584	3.18569e-09
CHCHD7	-0.25665	2.62447e-07
FYTTD1	-0.256695	3.03886e-05
ATP5MG	-0.25671	1.43281e-07
RPL17	-0.257783	5.25123e-26
ARRDC3	-0.259141	0.000547077
EDF1	-0.261952	1.54162e-06
TP53INP1	-0.262959	0.00599982
ZC3H15	-0.263949	3.97088e-05
THAP5	-0.264345	1.51891e-09
HNRNPH3	-0.26447	3.73209e-06
CKLF	-0.264833	0.0010224
BTG3	-0.265604	0.000126639
ZNF165	-0.265895	6.99569e-18
RPL31	-0.265909	1.13769e-35
RBIS	-0.267495	1.85299e-06
NAMPT	-0.268173	0.000289163
MRPL20	-0.268214	8.93653e-08
ATP5MC3	-0.268534	6.90454e-07
OTUD6B-AS1	-0.268732	4.14032e-06
ATP5MPL	-0.271045	1.26923e-07
TOMM7	-0.271794	3.68446e-16
WBP11	-0.271833	7.91525e-08
NDUFA6	-0.273084	1.05791e-06
JTB	-0.273464	9.16951e-08
NDUFA4	-0.273655	9.52545e-09
SS18L2	-0.274461	4.79847e-07
CDC26	-0.27465	3.77299e-08
RPL7	-0.275695	2.03652e-22
PLSCR1	-0.27627	8.37224e-08
BCL2L11	-0.276416	0.000483835
NDUFA12	-0.277458	1.17755e-08
SNHG29	-0.278083	4.69327e-12
SNRNP27	-0.279356	1.48622e-14
SELENOM	-0.279561	2.12806e-08
KRR1	-0.280456	1.1715e-08
UQCRQ	-0.281778	5.95723e-08
TGIF1	-0.282565	8.37804e-09
CALM2	-0.282594	1.86097e-11
EMC7	-0.282871	1.18512e-13
LDHA	-0.283111	6.73144e-07
SNRPD3	-0.283119	6.07687e-10
CAMLG	-0.285752	6.538e-08
GABPB1-AS1	-0.2864	6.86665e-06
YWHAH	-0.28693	2.18883e-06
CHRNA1	-0.286942	1.99121e-11
DDT	-0.287037	2.98493e-08
DDX24	-0.287255	5.38034e-10
RAN	-0.287923	1.26836e-09
NDUFA1	-0.288371	4.23713e-08
COPS9	-0.289129	3.66089e-11
IRF8	-0.289343	5.49343e-08
AIMP1	-0.289641	1.74918e-11
DDX18	-0.289845	3.49873e-07
CXCL8	-0.290453	5.3124e-08
SLIRP	-0.291098	6.85272e-11
RPS27L	-0.291924	1.9494e-05
IGHD	-0.295634	7.35601e-06
SVIP	-0.296282	6.3336e-10
TESK1	-0.296429	3.58682e-18
ARL4A	-0.2973	2.58542e-06
PEBP1	-0.297559	1.81151e-08
GLRX	-0.300123	2.17927e-10
NDUFS6	-0.300301	3.26183e-11
MRPS18C	-0.300559	2.71931e-16
PCMT1	-0.301188	2.36995e-14
CYSTM1	-0.302346	3.95159e-06
NSMCE3	-0.302908	1.51419e-08
LSM12	-0.304083	6.88082e-15
HNRNPDL	-0.305727	1.43334e-21
SEC61B	-0.306515	1.52145e-08
SOCS1	-0.307724	1.16224e-09
PMAIP1	-0.308509	9.7369e-09
XBP1	-0.308743	3.14277e-11
IL2RA	-0.308789	9.09839e-06
PET100	-0.309601	3.26093e-10
USP8	-0.309688	3.11146e-08
SEC11A	-0.309698	4.88302e-10
SNRPN	-0.309713	1.32555e-11
N4BP2L2	-0.310727	1.94116e-11
NASP	-0.310775	4.36894e-09
AKIRIN1	-0.310915	7.9054e-12
SNHG15	-0.312244	5.51438e-06
CAPZA1	-0.312869	6.06856e-11
TWISTNB	-0.313917	1.57671e-06
SSBP1	-0.314306	3.89058e-12
COX7C	-0.314486	5.28607e-22
C9orf78	-0.315526	2.23649e-13
SNHG32	-0.31566	5.70261e-11
PITHD1	-0.315792	1.84463e-14
AMD1	-0.31698	1.57285e-09
BASP1	-0.317166	3.02121e-12
SF3B6	-0.318963	8.66242e-12
PSMA3-AS1	-0.320773	8.80378e-12
POLR2L	-0.321102	3.09223e-09
CD70	-0.32119	1.5575e-07
GADD45B	-0.321198	0.00115456
RBM8A	-0.321784	5.92557e-11
CHMP1B	-0.322571	3.66699e-08
EMC6	-0.323211	8.70748e-15
CDC42	-0.324069	7.26668e-18
PWWP2B	-0.324169	2.77274e-15
FTL	-0.325175	5.10308e-20
SNHG17	-0.326565	1.16134e-14
PSMA4	-0.32663	2.14099e-15
JUND	-0.32672	1.30544e-34
SH3GLB1	-0.326744	7.72933e-11
TMBIM4	-0.326819	2.07456e-10
LSM8	-0.328164	5.37734e-10
SON	-0.329954	6.94054e-16
C6orf62	-0.330084	1.09688e-18
AC024560.5	-0.330848	2.01059e-24
RSRC2	-0.332364	1.64483e-12
GRASP	-0.333176	1.48624e-09
BUD31	-0.333564	7.08236e-15
AL627171.2	-0.334085	2.61215e-22
AC245014.3	-0.334387	7.03728e-06
EIF5B	-0.334954	1.46105e-09
ATP5MD	-0.335952	5.93517e-12
FAM177A1	-0.336739	1.23003e-07
VAPA	-0.337041	1.37557e-13
ALOX5AP	-0.338325	0.00204013
CFLAR	-0.338327	5.45642e-18
ELOB	-0.339898	5.3536e-15
ZFAND5	-0.340245	1.73931e-08
EIF1AX	-0.341292	7.6758e-13
TOMM20	-0.341493	7.14156e-18
HLA-A	-0.342242	4.88103e-40
UQCR10	-0.342413	1.22338e-11
RGS2	-0.343667	2.72248e-08
SMAP2	-0.343823	1.5844e-30
CHURC1	-0.343827	1.05523e-13
NOL7	-0.343951	2.11429e-14
TMEM50A	-0.345209	2.01498e-13
ARL6IP1	-0.345785	1.2862e-12
YWHAE	-0.345852	4.30505e-14
LAPTM4A	-0.345891	1.38094e-15
GADD45GIP1	-0.347236	7.36234e-15
TAF1D	-0.348446	1.12869e-16
TARS	-0.351258	1.80409e-19
DDX27	-0.353091	1.86291e-13
SNRPB2	-0.353568	2.1677e-17
ELOC	-0.354208	2.60567e-14
PIK3IP1	-0.355482	6.73047e-11
MRPL52	-0.357089	1.75953e-15
LDLRAD4	-0.358485	2.94512e-09
RABGGTB	-0.359125	7.03599e-17
PA2G4	-0.360982	7.90687e-16
IFI44L	-0.361285	6.61579e-14
SGK1	-0.361716	0.00107872
HMGN1	-0.362018	1.15645e-20
POMP	-0.364523	5.02161e-15
SC5D	-0.365416	8.37768e-12
SULF2	-0.365559	4.41681e-25
RAC1	-0.365923	7.81835e-16
TMBIM6	-0.367187	9.03234e-22
SAR1A	-0.36772	3.59995e-21
RPS27A	-0.368413	1.50252e-102
MAGOH	-0.368756	7.73142e-21
NDUFA5	-0.368997	6.51148e-17
RBM38	-0.369537	2.92227e-13
SUMO2	-0.370199	9.16646e-26
NSA2	-0.372662	2.65179e-14
MITD1	-0.373212	1.92357e-20
AC020916.1	-0.374019	1.46206e-20
C19orf53	-0.375082	2.31513e-18
SRSF6	-0.375094	9.68282e-23
TCEA1	-0.375563	2.01108e-17
PSMA2	-0.375891	8.27623e-17
CXCR4	-0.378613	9.76599e-31
HLA-DRB1	-0.378749	3.78728e-37
EIF2AK2	-0.37914	9.82394e-16
STAG3	-0.379259	6.84189e-06
RPS21	-0.379327	1.14584e-90
SAT2	-0.381168	1.22156e-22
BRI3	-0.381762	2.03781e-17
MYL12A	-0.3833	1.18352e-23
DDX21	-0.383785	2.97548e-21
IFITM2	-0.383846	2.16725e-18
ENY2	-0.384253	5.06464e-17
RPL23A	-0.384978	2.94718e-36
NDUFB4	-0.385005	3.23725e-18
BAG1	-0.38707	4.63327e-20
BOLA2	-0.387356	3.44819e-29
SNHG8	-0.387548	1.41276e-23
TXNIP	-0.388362	5.58084e-33
PSMB1	-0.389537	7.77047e-18
RPS11	-0.389559	5.44855e-54
PSMA7	-0.389588	2.16771e-19
COX5B	-0.389808	6.41463e-21
AC044849.1	-0.391755	3.57031e-19
ANAPC16	-0.392753	2.27065e-19
SELENOS	-0.393047	1.50005e-23
LMO4	-0.393095	1.07576e-20
SET	-0.393159	9.43485e-26
GABARAPL2	-0.393422	9.57628e-17
SUMO1	-0.393879	1.22695e-17
ZCCHC10	-0.393941	3.83419e-20
RWDD1	-0.394567	3.59369e-16
PCBP2	-0.395145	1.53739e-20
SAT1	-0.395824	4.23481e-27
LRRC75A	-0.397015	3.59422e-41
CMTM6	-0.397253	3.49959e-25
ARPP19	-0.399858	7.36318e-20
AL499604.1	-0.400874	2.92985e-19
RPL13A	-0.4017	3.1634e-41
HES1	-0.402896	2.42803e-21
RPL36AL	-0.405174	3.01244e-32
ATG12	-0.406668	3.64206e-21
AL365272.1	-0.407153	1.21483e-26
RPS26	-0.409382	1.71181e-23
SNHG7	-0.410401	6.74095e-23
SRP19	-0.410523	6.99243e-23
ATP5PF	-0.410785	5.73376e-21
PCBP1	-0.411467	1.05616e-24
MXD4	-0.412308	9.8041e-25
SRRM1	-0.412843	8.27687e-22
RPL35A	-0.41337	5.78797e-95
SEC61G	-0.414054	5.14202e-22
NOP10	-0.414668	4.02773e-21
ATP5IF1	-0.415751	2.15326e-19
COX7B	-0.419027	4.55932e-21
UPF2	-0.421556	1.95574e-18
CLECL1	-0.421616	3.05554e-18
CIR1	-0.422801	2.84794e-18
MED30	-0.423217	3.42341e-27
SSU72	-0.426652	6.8412e-26
SEC11C	-0.427675	2.17226e-25
MOB1A	-0.428397	3.54127e-28
MRPL41	-0.429079	2.82073e-22
POLR2K	-0.430285	7.18163e-23
PTMA	-0.437007	6.74417e-101
USF2	-0.437256	8.167e-29
KTN1	-0.437411	5.61101e-26
SNRPB	-0.437634	3.35016e-30
SMDT1	-0.439654	1.69114e-28
SFTPC	-0.440051	3.04128e-10
SNHG12	-0.440534	1.93303e-23
ATP6V1G1	-0.443689	1.93137e-28
RNF7	-0.443812	1.77883e-24
ATP6V1F	-0.444041	4.21065e-23
MDM4	-0.444678	1.81283e-22
ATF5	-0.44629	2.95896e-16
MORF4L1	-0.446497	3.54289e-34
TMEM59	-0.447	7.66732e-27
GLO1	-0.448081	7.47363e-26
METRNL	-0.448583	2.55783e-19
CREBRF	-0.449197	1.49177e-22
IDI1	-0.449825	5.39151e-17
TMEM107	-0.450229	9.82835e-22
TYMP	-0.451465	7.12061e-19
RPS28	-0.451488	5.05517e-123
IGLC2	-0.452368	0.000442968
GPR183	-0.456716	1.34931e-23
UBL5	-0.457492	3.21543e-29
COX6C	-0.458568	1.28095e-29
GABPB1-IT1	-0.459785	1.85239e-25
YBX1	-0.462505	1.40245e-49
TLE1	-0.463219	1.11935e-20
SLC3A2	-0.463482	4.71334e-25
OST4	-0.464719	2.08146e-43
SIVA1	-0.467752	3.25207e-27
ATP6V0C	-0.468727	1.22866e-32
KRT10	-0.469855	2.28792e-29
RNMT	-0.471544	7.26996e-26
NDUFB1	-0.472379	1.94506e-32
NFE2L2	-0.474357	4.55946e-28
RPL23	-0.474725	4.84432e-57
BCL2A1	-0.474803	1.08332e-25
PHACTR1	-0.477936	1.4608e-16
EPB41L4A-AS1	-0.480945	5.26141e-31
STMN1	-0.484775	5.54536e-30
RPL36	-0.485616	7.6145e-130
TPT1	-0.48633	1.55056e-104
KLK1	-0.492846	1.91946e-19
SRSF3	-0.493058	2.06524e-29
SYAP1	-0.494528	1.41166e-23
TBCA	-0.496231	4.01903e-32
FAM133B	-0.49787	9.6112e-30
DEK	-0.497898	1.42877e-28
CCDC59	-0.502963	4.41124e-29
SSPN	-0.503226	6.1283e-27
ATP5ME	-0.507971	3.64665e-30
NDUFS5	-0.508272	1.38666e-32
LAMTOR5	-0.512273	6.08843e-34
SYF2	-0.51453	3.5931e-32
CHPT1	-0.520085	1.03849e-37
UBE2B	-0.522449	2.10696e-42
RPS19BP1	-0.523082	3.6606e-41
CD63	-0.523234	4.09338e-32
SRP14	-0.524305	1.16243e-54
SNRPG	-0.52485	1.63624e-38
RILPL2	-0.527727	5.49267e-36
ITGAE	-0.530696	3.79713e-34
LY9	-0.530823	1.8852e-42
SUB1	-0.53158	2.41927e-38
C11orf58	-0.532085	6.11413e-38
GPR65	-0.532477	5.28849e-32
SNU13	-0.532645	2.46814e-41
RPL22	-0.533835	4.57525e-117
NUCKS1	-0.53443	1.50802e-35
ATF4	-0.534505	7.22675e-39
PPP1CB	-0.537207	3.71628e-36
ATP5F1E	-0.541229	6.5828e-73
ATP6V0E1	-0.544317	6.65139e-47
RPL36A	-0.544424	3.10643e-106
AL121944.1	-0.545742	9.85755e-39
HSPA5	-0.547301	7.03456e-30
DBI	-0.547557	2.69347e-30
SPCS2	-0.557799	1.507e-41
AC016831.5	-0.558101	2.49295e-42
RPL34	-0.560673	1.14285e-202
SAP18	-0.563402	3.8566e-43
BIRC3	-0.565502	9.0836e-38
SKP1	-0.566834	1.45094e-56
COX7A2	-0.572485	3.49016e-54
TMA7	-0.579725	2.21976e-66
RPL37	-0.580651	4.45158e-157
ITM2B	-0.582696	1.04612e-47
UQCRB	-0.584783	8.0134e-72
ASAH1	-0.590052	2.49931e-34
OAZ1	-0.593657	4.57126e-109
SNHG9	-0.594779	1.12414e-49
TXN	-0.596433	5.51453e-32
MT1X	-0.597174	3.22869e-10
RPL9	-0.599442	2.63344e-153
DNAJC8	-0.601015	6.25702e-44
RSL24D1	-0.601112	2.12902e-54
RPS17	-0.604389	4.23203e-67
GPX4	-0.609519	2.82439e-58
HERPUD1	-0.610481	4.89331e-77
SELENOK	-0.610672	2.64388e-56
WDR74	-0.619966	2.83631e-46
UQCRH	-0.641252	2.87604e-67
EIF1AY	-0.643113	3.23328e-45
CEBPB	-0.644834	3.95299e-56
EIF1	-0.653638	1.19041e-202
LSM7	-0.656539	1.99423e-57
MRPL33	-0.660126	2.8356e-64
EIF1B	-0.660996	7.81676e-67
AC083862.3	-0.663729	1.21991e-92
EIF2S2	-0.66771	6.72988e-54
RPS27	-0.669789	2.62919e-261
ATP1B3	-0.671471	1.11569e-38
ZFAS1	-0.679825	1.70235e-122
COX14	-0.682635	1.78359e-73
PLIN2	-0.68476	5.02235e-42
BTG1	-0.688733	4.66626e-130
PFDN2	-0.690514	1.317e-72
AREG	-0.69873	2.40856e-18
ZNRD1	-0.701966	4.26177e-39
HSP90B1	-0.71415	1.35343e-56
CYCS	-0.71659	2.98088e-72
H3F3A	-0.721879	2.58031e-128
ISG20	-0.736262	2.94116e-93
RPL37A	-0.741322	1.66061e-145
RGS1	-0.747351	4.45923e-32
SEPTIN7	-0.752328	8.26286e-92
MT2A	-0.762878	1.68693e-71
AC253572.2	-0.769473	1.15206e-46
RPL21	-0.782307	7.02583e-206
SNHG6	-0.789555	1.66504e-118
RPL38	-0.791526	3.12116e-169
C1orf56	-0.806377	3.45804e-94
RPL39	-0.815146	0
RPS20	-0.81889	2.79328e-126
SRGN	-0.823301	2.92437e-108
H2AFZ	-0.828514	2.02754e-114
AC103591.3	-0.82986	4.45656e-45
SIT1	-0.842553	1.58146e-77
TOMM5	-0.843007	2.27335e-88
CCL4	-0.846563	5.05975e-78
BCL11A	-0.849672	2.61435e-92
MT-CO3	-0.852868	1.91192e-229
RCN2	-0.856915	2.69445e-90
CCDC107	-0.858549	2.49651e-88
SEC62	-0.886261	5.08794e-107
CREM	-0.905199	2.40035e-94
MT-ND1	-0.916664	2.54896e-193
COX17	-0.929851	5.38861e-104
LINC-PINT	-0.952807	1.89858e-111
AC007952.4	-0.958314	1.8544e-116
IGKC	-0.961647	8.89336e-101
IGLC3	-0.96733	3.06427e-28
MALAT1	-0.978466	2.72993e-259
HMGB1	-1.06687	2.47389e-237
AC058791.1	-1.09436	3.26213e-144
HNRNPH1	-1.10702	1.55644e-179
MT-ND4	-1.11409	1.81537e-294
MT-CYB	-1.11544	4.52687e-298
HLA-DQA2	-1.16005	1.98274e-203
IGHM	-1.19428	1.44881e-77
RPS29	-1.265	0
MT-ND2	-1.36331	0
MT-CO2	-1.42858	0
MT-ATP6	-1.51819	0
RPL41	-1.78249	0
RPS10	-1.79913	0
MT-ND3	-1.95601	0
Note: Avg_log2FC>0 genes overexpressed in mature B cells of IPF lungs; Avg_log2FC<0 genes overexpressed in mature B cells of control lungs.

## Sheet: table S9  IPFvsCon Plasma Cell 
table S9. Differentially expressed genes in IPF vs. control plasma cells
Gene	Avg_log2FC	Adjusted_pValue
IGLV1-51	7.11713	1.99334e-21
IGLV2-11	6.58489	1.60028e-16
IGLV3-25	6.16911	1.14774e-08
IGKV3-11	5.79887	0.00794614
FP236383.3	5.78057	5.78845e-13
IGLV2-8	5.66777	9.19378e-06
IGLV3-1	5.34389	4.1598e-15
IGLV4-69	5.32546	4.15946e-06
IGHV3-21	5.1726	0.0025749
IGHV1-2	5.04904	1.1165e-07
IGHV3-23	4.86725	2.84427e-09
IGLV2-14	4.61821	7.1038e-07
IGHV3-15	4.54067	1.68019e-06
IGHV4-39	2.65174	3.43211e-05
FP671120.4	2.45487	9.05814e-10
IGLV3-21	2.35746	7.48332e-11
IGKV3-20	2.21854	1.12329e-09
IGHV3-30	1.94635	4.28421e-08
IGHG2	1.82037	7.7258e-06
IGHG1	1.78928	2.75745e-22
IGLV2-23	1.73509	1.25199e-06
IGLV6-57	1.72433	3.21485e-11
IGLV1-40	1.50779	1.67979e-06
CCL4L2	1.4435	0.0126366
IGKV3D-20	1.2455	0.0116445
RHOB	1.20284	0.00432655
CD74	1.14362	1.0831e-26
ZMYND11	1.06351	0.000868459
HSPA1A	0.981736	5.94327e-05
IGHV3-11	0.954879	0.000131408
IGKV3-15	0.92037	1.43511e-08
IGKV1-5	0.835025	0.0342264
XBP1	0.815279	7.10833e-11
DPEP1	0.793351	2.49322e-09
HLA-DQB1	0.760026	3.10225e-07
HIST1H2BG	0.749531	0.00548873
HLA-DRB5	0.709146	9.40007e-06
TENT5C	0.708363	0.00229472
JSRP1	0.706494	0.00389528
IGHG3	0.577738	3.01112e-13
HIST1H3H	0.576346	3.33959e-08
IGLV1-47	0.57496	4.25449e-05
RBFOX2	0.54644	0.0220835
LPCAT4	0.512661	4.05947e-05
SDC1	0.506865	0.00141851
PRDX4	0.489796	0.000112323
ADA2	0.482677	0.00026542
PTPRCAP	0.478523	2.45763e-06
FKBP2	0.447943	0.00614613
DERL3	0.444287	0.00053581
HIST1H3C	0.440457	0.030286
SPSB1	0.350967	3.26749e-05
AC012236.1	0.29986	0.0454467
IGLV1-44	0.284235	0.000101711
FOXP1	0.187063	0.00167086
KANSL1	0.152822	0.00135878
NFKB1	0.152218	0.00246606
IGLV3-19	0.115681	0.00038983
RBM42	-0.10017	0.0431163
PIN4	-0.100241	0.00681944
MPC1	-0.100955	0.00871303
PSMG1	-0.101439	0.000260124
H2AFX	-0.101922	0.0486558
SLC25A4	-0.103487	0.0337829
CFDP1	-0.103806	0.00045256
MED6	-0.1048	1.49557e-07
HNRNPA1P48	-0.104904	1.24923e-11
G3BP1	-0.106319	0.0496069
DNAJC18	-0.107688	1.04706e-05
APIP	-0.109836	0.000907442
TP53BP2	-0.111394	0.00184299
AC020916.1	-0.112964	0.0153703
SF3A3	-0.113649	0.00288189
AC016831.5	-0.115162	0.000163021
VTI1B	-0.115912	0.0190547
RAB3GAP2	-0.117253	0.0417143
SNHG17	-0.118792	0.00345942
DPM1	-0.120599	4.73445e-05
CCZ1	-0.12154	2.68169e-07
SLC4A1AP	-0.121788	0.00116612
WDR45B	-0.121934	0.000763065
USF2	-0.122074	0.000463681
PDCD4	-0.122532	1.83456e-07
CLDN3	-0.125302	8.74181e-08
SNRNP27	-0.12565	0.00102166
RPS6KB1	-0.126029	0.00328056
BNIP3	-0.126281	3.45912e-07
GLTP	-0.126389	0.020964
CEBPZ	-0.126803	1.84831e-06
CDC26	-0.127341	0.000144125
THAP5	-0.127983	5.47158e-05
SCFD1	-0.128268	0.0153126
ABRACL	-0.128296	0.0469506
CHMP2B	-0.128887	0.0463476
ESD	-0.128903	0.0156561
BRD9	-0.129196	0.00931598
PRR34-AS1	-0.12949	0.0149716
PNO1	-0.129835	0.00144418
UTP11	-0.130053	0.00156883
ZDHHC12	-0.131278	0.0311598
HAT1	-0.132564	1.25256e-07
DDX1	-0.133187	1.88227e-05
MAGOH	-0.133876	0.000227944
AKNA	-0.134068	0.032815
SLC39A3	-0.13486	0.00444953
AK6	-0.1358	0.00567683
TIMM9	-0.137639	5.23106e-05
XRCC6	-0.138648	0.00190943
GNPDA1	-0.138733	0.0452307
GPN2	-0.139163	0.00843747
VPS26A	-0.140296	0.0196906
UTP3	-0.140432	0.0036766
SFT2D1	-0.140742	0.0342715
ACTR10	-0.141916	0.0160279
DDX6	-0.143763	0.00359278
EEF1E1	-0.144412	0.00502091
APEX1	-0.144418	0.0142604
CBFA2T3	-0.144793	7.67101e-06
AIMP1	-0.145247	2.78305e-06
MAPK1	-0.145749	5.47728e-05
HIPK1	-0.146472	3.61569e-07
NR1H2	-0.146818	0.0238943
GTF2B	-0.148222	0.00775468
RSRC2	-0.149282	0.0211546
FBP1	-0.151019	2.54065e-05
PYURF	-0.151035	5.0151e-06
SMC3	-0.151388	0.0213929
THUMPD1	-0.151471	0.00296099
AC091607.2	-0.152121	4.77878e-11
AMPD1	-0.15219	9.91317e-06
CIR1	-0.153067	0.00585823
LTA4H	-0.153579	0.000769886
CAMLG	-0.154511	0.0180993
TARS	-0.155937	0.0142297
PHF20L1	-0.157754	0.0302714
NUDT21	-0.157959	0.0403853
BCAP29	-0.157999	0.0168156
GLRX3	-0.158094	0.0166222
PHF20	-0.158685	1.30526e-05
CHCHD7	-0.161251	5.20084e-06
ARPC4	-0.16234	0.0463315
UBE2W	-0.162637	0.0221601
EFTUD2	-0.162972	0.0383959
NUP54	-0.16298	9.58685e-05
MX2	-0.163692	0.000936327
AL360012.1	-0.164235	2.09355e-06
CAPZA1	-0.166101	0.00452989
NDUFAB1	-0.167024	0.0126659
PSMD1	-0.167561	3.21858e-05
CLN6	-0.167852	6.88216e-05
CD9	-0.168203	0.00201761
NDUFA5	-0.168859	0.031673
DNAJC19	-0.169409	0.00126885
MRPL1	-0.170138	0.000115005
ARL2BP	-0.170547	0.000578277
LSM12	-0.170948	7.39724e-06
RNF181	-0.171646	0.0168424
COPRS	-0.17308	0.0148224
P4HA1	-0.173392	0.0433529
CHMP4A	-0.173856	0.000805893
NDUFV3	-0.173901	0.00793537
SH3BP2	-0.176137	0.0235307
MSRA	-0.177398	0.00645011
FYTTD1	-0.177423	0.00106322
EPRS	-0.177439	0.00523369
SRP9	-0.178458	0.0211344
ZC3H15	-0.178602	0.0340495
CCDC59	-0.178774	2.63762e-13
EVI2A	-0.17953	0.000801459
ZNF165	-0.179698	4.09174e-07
FRG1	-0.17993	0.000362569
ALYREF	-0.18146	0.000322768
DNAJC2	-0.181867	0.0344692
THOC7	-0.183036	0.000436234
TCEAL3	-0.183124	8.06414e-05
HNRNPM	-0.18381	0.00718721
DAPP1	-0.183828	8.23143e-05
PITHD1	-0.183955	0.000420594
EIF2AK2	-0.18475	0.00150833
MRPS35	-0.184905	0.0377822
EIF1AD	-0.185344	0.0350979
SNX4	-0.18604	3.5525e-05
SNRPB2	-0.186215	0.000726412
DCTN6	-0.186456	0.000967565
BEX2	-0.18696	9.92269e-09
POLR2J3	-0.187058	0.00384141
SYNCRIP	-0.187358	0.0122784
TCEAL4	-0.188699	4.01173e-12
GNG10	-0.188891	9.48329e-05
SEC23B	-0.189847	0.0147768
RBM7	-0.190424	0.00920996
COPB1	-0.190462	0.000572052
COX16	-0.191071	0.00524345
CAPZA2	-0.192976	0.00116461
TOX4	-0.193669	0.00358328
LRRC41	-0.193962	0.0152763
MCTS1	-0.193978	0.00670239
NGDN	-0.194215	0.0097824
CHMP5	-0.194455	4.87114e-09
RBM4	-0.194772	0.00486684
PPP1R2	-0.195289	0.0187026
BECN1	-0.195385	0.00232027
NARS	-0.195539	0.000139102
SRRM1	-0.195898	6.66896e-05
BOLA2B	-0.196067	1.61852e-11
NCBP2	-0.19691	0.000958521
UBA5	-0.197037	0.00262167
TUBB2A	-0.197565	0.0494096
UPF2	-0.198393	0.00249899
EIF3D	-0.198454	0.0237166
VPS4B	-0.199287	0.0282025
MRPL40	-0.201204	0.031201
N4BP2L2	-0.202616	0.00181279
PSMA4	-0.202687	0.000279346
EIF3J	-0.202937	3.5204e-08
LSM3	-0.203052	0.00364923
SMIM26	-0.203506	1.40387e-05
COPZ1	-0.203887	0.0330015
SMARCB1	-0.205005	0.00370447
CCNC	-0.205245	0.00280885
SNW1	-0.206279	0.00252968
PEPD	-0.206485	0.00260256
SUMO1	-0.206558	0.000532569
H2AFJ	-0.208814	0.00981333
MRPS21	-0.208904	8.40303e-05
MED10	-0.209374	5.77988e-07
MRPL23	-0.209833	2.79606e-06
WBP11	-0.210076	1.20866e-05
MED8	-0.210289	0.0453682
NOP58	-0.210595	0.0013353
CMPK1	-0.210599	0.00700118
PSMA3	-0.21082	0.000114884
MRPL21	-0.210857	2.69229e-08
XPOT	-0.211494	0.00194911
SNHG25	-0.212252	1.35076e-12
MRPL20	-0.212301	0.00138259
NAPG	-0.212448	2.87962e-07
MERTK	-0.213439	0.0106595
GABARAPL2	-0.213881	0.0146656
TXNDC9	-0.214296	0.00185677
POLR2K	-0.215201	1.16663e-06
SRP72	-0.216547	0.000241247
DDX27	-0.216754	0.000399647
SLC22A17	-0.217432	6.37194e-08
UFC1	-0.217848	0.0345429
SNHG29	-0.219207	0.00931506
MAP1LC3A	-0.21968	2.60811e-06
TTC1	-0.220578	0.0137036
AL121944.1	-0.220927	0.000330642
TMCO1	-0.221238	0.00132247
HOMER3	-0.221401	4.32386e-06
DNTTIP2	-0.222113	7.19922e-05
MTRF1L	-0.222118	0.0307954
ZNFX1	-0.222482	0.005685
CTHRC1	-0.22264	0.000548728
BLOC1S6	-0.222997	0.000688518
SERINC3	-0.224838	0.00799135
SAMSN1	-0.225009	0.0139611
MED28	-0.225421	0.000176532
ARL8B	-0.225441	0.00432721
ATP6V1E1	-0.225818	0.000359093
MDH1	-0.225885	2.0077e-07
ADAR	-0.226181	0.0170125
ZNF587	-0.226972	0.00128175
CADPS2	-0.227072	0.000595177
A1BG	-0.228944	0.0317033
ARRDC3	-0.229098	0.00147685
CLNS1A	-0.229275	0.00309242
ALG2	-0.229843	0.00246407
SEC22B	-0.230118	0.00033163
HNRNPH1	-0.231167	0.00829814
PGM3	-0.233605	0.0363173
PSMD12	-0.23496	0.0035367
AC083862.3	-0.236518	9.15114e-06
BMI1	-0.237858	5.88194e-06
LSM5	-0.238516	3.44209e-10
SHOC2	-0.239084	0.000244877
SS18L2	-0.239213	2.4868e-07
PSMC6	-0.239817	8.65209e-09
SRP19	-0.240404	0.000574346
TNFRSF13B	-0.241142	1.32705e-05
SERPINB6	-0.24169	7.30868e-13
BMP8B	-0.241758	1.61342e-05
PAIP2B	-0.242151	1.65614e-06
IK	-0.242239	0.000449565
SYF2	-0.24243	1.55846e-05
MCM3AP	-0.242879	0.0436822
TBC1D15	-0.243213	0.000234586
GTF2F1	-0.243294	0.000451031
FAM177A1	-0.243356	0.00393653
PRXL2C	-0.243645	1.15181e-07
RPS3	-0.243764	0.0101356
AQR	-0.243921	0.000204712
POLR2J	-0.243975	4.10077e-05
MRPL41	-0.246971	0.000850337
PNPLA8	-0.247631	0.0110286
ORMDL1	-0.24835	0.000269577
C1QBP	-0.249352	0.00673164
BOLA2	-0.249734	1.31567e-13
U2SURP	-0.249765	0.00279867
UBE2I	-0.249838	0.0295055
POLR3D	-0.249973	0.0051307
FXR1	-0.250441	0.0133449
ETF1	-0.250655	0.00949623
ERH	-0.2515	4.33375e-05
RPS4Y1	-0.251802	0.0341023
GALNT3	-0.251806	0.00296688
PSMD7	-0.252334	0.0104228
SLC30A7	-0.253	0.0200847
HNRNPC	-0.253275	0.0488138
C19orf53	-0.253464	0.00344811
POLR2I	-0.255151	0.00204587
MRPS18C	-0.255783	2.78222e-11
MTFP1	-0.256253	0.0435646
TWISTNB	-0.25656	1.74602e-09
RHOQ	-0.257132	0.00830396
COMMD6	-0.257188	4.54461e-05
SH3GLB1	-0.257858	7.53816e-06
DNAJC7	-0.257925	0.0113922
CCNK	-0.257969	0.00302101
SAR1B	-0.257989	0.026211
MRFAP1	-0.258197	0.0329477
NDUFB5	-0.258346	0.0144832
TSPYL2	-0.260593	0.00029126
EIF3M	-0.260825	7.36179e-06
C7orf50	-0.262573	1.50973e-05
IGBP1	-0.263918	0.0020366
EIF1B	-0.263989	0.000546248
BTF3L4	-0.264922	0.000872667
ARHGAP5	-0.265521	0.000154087
BCL2	-0.265564	2.10262e-06
KTN1	-0.267102	0.000656316
MRPS36	-0.268438	0.00165319
ARMCX3	-0.268461	0.0233036
UQCRFS1	-0.269017	0.0344784
POLE3	-0.269143	4.08161e-05
STX11	-0.27036	0.0023929
MOB1A	-0.270449	4.77776e-08
RSL1D1	-0.271531	0.0042463
KPNA4	-0.273367	1.25578e-05
AZI2	-0.273608	0.0141626
BUD23	-0.275135	0.0113819
MRPL33	-0.275182	0.00782129
ATP5PF	-0.275311	0.0383733
RASD1	-0.27534	0.00412631
NOL7	-0.278641	0.000606928
HNRNPD	-0.280059	0.00971618
C11orf58	-0.280155	8.76423e-06
SUPT5H	-0.280659	1.48045e-06
DDX24	-0.281131	0.000205751
BEX5	-0.281485	5.70593e-07
EIF3F	-0.284252	0.0473096
DRG1	-0.285221	0.0200815
RBMX	-0.285401	0.000836022
SPART	-0.286542	0.0001014
PTPN2	-0.288017	0.0318633
CCDC47	-0.288175	0.008392
SNRPD1	-0.288271	9.63238e-08
ABCF1	-0.290068	1.59795e-06
ATP5PD	-0.290356	0.00477327
WTAP	-0.290404	3.1011e-07
CHPT1	-0.29047	0.000893758
FKBP1A	-0.290578	0.0405297
VDAC2	-0.291198	0.0101389
EML5	-0.292012	0.000124455
C4orf3	-0.292979	0.000590055
LINC-PINT	-0.293434	1.89174e-06
DDX18	-0.294008	3.79633e-08
RPL30	-0.294548	0.00225814
CXCL3	-0.294919	0.0131426
CHMP2A	-0.29492	0.000634286
PRPF6	-0.295954	1.09009e-08
GSTP1	-0.296179	0.0178497
PDCD10	-0.296378	0.000380756
PDCD6	-0.296641	6.29639e-05
RBM8A	-0.297088	0.00361953
STAT4	-0.297228	1.08572e-13
AC005261.1	-0.297586	2.54672e-10
MAPRE1	-0.297958	4.07683e-06
MICOS10	-0.298201	1.37866e-06
VPS29	-0.299101	0.000668554
IFITM2	-0.299654	0.00405803
RPA2	-0.299835	2.64755e-07
BCAS2	-0.300194	0.000131572
PSMB2	-0.300753	0.00557051
SPINT2	-0.30082	1.16142e-10
ITGAX	-0.301928	0.000108893
UBE2V1	-0.302012	2.88669e-06
PGLS	-0.302508	0.00542167
PSMD13	-0.303552	0.0045509
STOM	-0.304032	5.57529e-10
SEM1	-0.304409	0.010985
SSBP1	-0.304838	1.04437e-09
ATP6V0D1	-0.3051	0.0468428
RHOA	-0.305676	0.00849829
YWHAE	-0.307332	0.000564196
ARHGDIA	-0.307736	0.000629447
FOSL2	-0.308688	0.0332026
ARPC5	-0.310125	0.000771471
RABGGTB	-0.311341	9.12658e-05
RGS2	-0.31152	0.00380877
SMIM3	-0.311566	4.66087e-05
UCHL1	-0.312997	0.0498249
WDR33	-0.313205	5.32131e-05
TAX1BP1	-0.314893	2.52013e-05
GTF3C6	-0.315981	0.000369436
AL021155.5	-0.31726	0.00881415
NONO	-0.31737	0.023285
AC103591.3	-0.317403	6.03277e-06
SNRPB	-0.317634	0.000153637
WDR83OS	-0.317722	0.0084002
BRK1	-0.319055	0.000872184
INSR	-0.319609	1.78486e-07
RNASEH2C	-0.319882	7.35045e-06
PFDN2	-0.320326	9.81502e-07
RHEB	-0.321241	0.00427127
SAP18	-0.321407	1.85465e-05
NDUFB9	-0.321523	0.00166234
RWDD1	-0.323256	7.08617e-05
ZBTB8OS	-0.323365	0.000344367
CTSH	-0.324026	0.000152443
VAPA	-0.324836	0.000326748
SSR1	-0.326479	0.0167385
AC044849.1	-0.327078	1.35651e-07
PDCD5	-0.327202	0.00159319
RNH1	-0.328406	2.47488e-06
WHRN	-0.328415	1.13662e-06
TFRC	-0.329097	0.00158458
HSPA9	-0.329401	1.50181e-05
ARL4A	-0.330174	1.89498e-07
DERL2	-0.33059	1.37783e-07
RPL12	-0.331046	0.00634781
MTHFD2	-0.332197	0.00412299
BZW1	-0.332644	1.88968e-08
SNRPG	-0.332796	9.61054e-07
RPS7	-0.333594	0.0201844
TMEM38B	-0.335143	2.54253e-08
AP3S1	-0.337028	3.22252e-08
SRSF5	-0.337065	9.83194e-12
BTF3	-0.338061	2.66614e-05
ATXN10	-0.338123	3.31528e-05
GSTO1	-0.338405	0.000669909
ASAH1	-0.339343	0.00422651
TOMM20	-0.340245	0.000639478
SNHG16	-0.340737	3.92039e-08
GLO1	-0.340898	4.02332e-08
SRP54	-0.341161	5.6274e-07
TOMM7	-0.343743	1.5985e-05
LAMP1	-0.343966	0.00296104
SAR1A	-0.344732	0.000413329
PA2G4	-0.345321	6.50968e-06
EIF3K	-0.345536	0.00265417
SLC30A1	-0.345759	0.0262017
FXYD5	-0.345894	0.00584338
SARS	-0.346234	0.0300296
IFNGR1	-0.346674	3.78513e-05
KRTCAP2	-0.34716	0.00471403
NDUFB11	-0.347414	0.0154462
CMSS1	-0.348548	1.16303e-07
CAST	-0.348953	0.00130222
TMED2	-0.352923	0.00417557
SELENOM	-0.353122	0.0219829
AC253572.2	-0.358484	0.00600169
MX1	-0.359193	8.46994e-07
AC058791.1	-0.359422	2.32326e-08
RPL32	-0.359593	0.00179422
RBIS	-0.360521	6.39986e-09
GNG5	-0.361263	0.00178455
NEDD8	-0.362068	8.37273e-05
AMD1	-0.363394	0.000209271
MT-ATP6	-0.364765	0.00153411
GABARAPL1	-0.365466	0.000123808
ATP5MC2	-0.369002	0.0055399
ATP6V1G1	-0.369433	0.000271224
SNRPE	-0.369476	7.43098e-08
SUMO2	-0.369894	2.57058e-06
ERP44	-0.373316	1.17757e-05
RPS13	-0.373397	0.0118444
CDC42	-0.373527	0.000648496
LY96	-0.373759	0.0148632
PLP2	-0.375794	0.000362241
TMED5	-0.375884	0.000546782
PABPC4	-0.377805	8.95436e-06
SSR3	-0.378352	0.00409881
PLEK	-0.378968	0.00013627
COPS9	-0.379495	2.2775e-09
SCARB2	-0.380645	0.00336512
BLOC1S2	-0.381236	0.000110363
PSMA6	-0.381807	1.37879e-07
COX7A2L	-0.382842	9.9558e-08
EMP3	-0.383571	0.00868954
PJA2	-0.384243	2.65183e-05
TMEM59	-0.384296	0.00117961
PEBP1	-0.384456	0.00712665
RAP1B	-0.384601	0.0012828
HMGN2	-0.385407	4.47004e-08
LDLR	-0.386114	2.20317e-08
SNHG6	-0.387572	9.83149e-05
TNFRSF17	-0.387667	0.00486947
NDUFA3	-0.38829	3.31885e-05
PAPOLA	-0.388772	2.42662e-05
KCNQ1OT1	-0.389892	0.00370388
UQCR11	-0.389902	0.000395914
PCBP1	-0.391391	0.0266194
RBM3	-0.391668	1.17851e-07
USP14	-0.391695	0.000620523
HERC5	-0.391974	8.06046e-09
DYNLT3	-0.392739	1.12936e-07
ATP5MF	-0.393187	1.58009e-07
CIRBP	-0.39397	4.67651e-05
EPB41L4A-AS1	-0.394463	2.94545e-12
CD48	-0.394478	2.78233e-07
LSM8	-0.394851	8.48452e-10
PSMC1	-0.395116	2.23527e-09
NDUFA1	-0.395692	0.00724242
SF3B6	-0.396749	1.05697e-09
ANAPC16	-0.397943	8.05413e-07
ENY2	-0.399159	0.00133288
PSMA2	-0.399215	1.43455e-06
RPL15	-0.399822	0.00139767
RPLP2	-0.400359	0.01395
OSTC	-0.402615	7.91412e-05
EIF3E	-0.403189	0.000354467
TNFRSF4	-0.403643	4.57066e-15
RPL10	-0.404033	1.70219e-05
KDELR2	-0.40512	1.92956e-05
SNU13	-0.406092	0.00154493
AL139099.1	-0.406278	0.00555949
PTCH2	-0.407144	0.0111655
SSR2	-0.407527	0.000890944
TMBIM4	-0.407925	1.09736e-08
NSA2	-0.408485	7.72006e-07
RNF130	-0.409072	6.97907e-10
RPS16	-0.410075	0.0169927
TIFA	-0.410183	0.00539399
TOMM22	-0.41243	6.94532e-08
SSU72	-0.414151	1.04285e-08
RPS23	-0.415069	0.00024366
EIF5B	-0.41654	0.00463075
PET100	-0.41776	4.38746e-07
PRDX6	-0.41873	0.0017133
PSMB1	-0.418839	6.20156e-10
RPL24	-0.419653	3.49866e-05
PCBP2	-0.419746	5.52656e-05
SNHG8	-0.420218	1.18262e-06
COX7A2	-0.422263	0.0123497
PPP1CB	-0.424312	7.89624e-14
ATP5MPL	-0.425717	2.16067e-07
HNRNPA1	-0.426998	0.000369478
RPL6	-0.427002	8.68673e-06
SRSF9	-0.427603	8.36125e-06
SERP1	-0.428101	3.6733e-06
RSL24D1	-0.428226	3.54683e-07
POU2AF1	-0.428584	0.00358815
COX6A1	-0.428883	8.7235e-05
RPS15A	-0.431149	2.40027e-05
RNF144B	-0.43124	2.77381e-05
DNAJC3	-0.433403	1.9342e-05
GAS5	-0.433441	4.98868e-05
CLECL1	-0.433476	4.72422e-18
UQCRQ	-0.434613	0.000262158
CTSW	-0.435156	1.72871e-05
SBDS	-0.436119	4.07701e-10
SLC16A3	-0.436571	0.0112674
GHITM	-0.437019	4.85022e-09
MGST3	-0.437185	6.43778e-07
RNF7	-0.437339	2.80971e-05
ATP6V1F	-0.443538	0.00980687
NDUFB2	-0.443686	0.00982712
RPS25	-0.44402	4.7659e-06
CLEC2D	-0.445268	0.00746782
DSTN	-0.446765	6.16358e-06
FAM107B	-0.446821	0.0145554
ELOC	-0.447542	5.61199e-10
CALM2	-0.448174	1.74099e-05
COX7C	-0.44913	7.98261e-06
MORF4L1	-0.449225	1.32066e-06
ROMO1	-0.450398	0.00299631
RBM39	-0.450776	0.000603319
ATP5MD	-0.451556	8.92602e-06
EIF2S2	-0.454115	5.16938e-08
CPD	-0.454238	0.0392797
RAB5C	-0.454628	3.04023e-08
RPL26	-0.457046	2.78472e-07
SERF2	-0.457605	0.000258354
EEF1B2	-0.457685	0.00120338
PSMB3	-0.461649	6.73963e-09
PTMA	-0.462007	0.000123461
ZFAS1	-0.466379	4.1811e-05
CANX	-0.467804	0.00010153
HNRNPDL	-0.471202	2.0883e-08
PRNP	-0.471578	1.64527e-07
POLR1D	-0.471878	2.32096e-08
COX5B	-0.472508	4.98996e-05
CIAO2B	-0.473128	5.86467e-08
CTSS	-0.474959	3.92188e-07
B2M	-0.475015	7.09653e-07
TRMT112	-0.476178	7.43048e-08
HNRNPA3	-0.477043	1.84785e-08
RAC1	-0.477162	7.81729e-05
RPS24	-0.478752	2.59813e-06
RPL14	-0.480063	3.06181e-07
ATP6V0C	-0.481774	0.000370488
IFNGR2	-0.481802	0.0081072
RPL31	-0.482161	3.85869e-05
FAM133B	-0.484286	4.40703e-09
CHURC1	-0.484352	1.77598e-09
SLIRP	-0.484728	2.29722e-10
RPL17	-0.485053	4.86657e-07
UBE2B	-0.492255	2.7682e-06
RPL36	-0.49226	9.47664e-07
COX7B	-0.494394	6.08172e-08
SLC3A2	-0.494771	0.000861429
ATP5MG	-0.495924	1.76994e-08
SNX3	-0.497554	1.6111e-07
SEC11A	-0.498475	8.3066e-10
COX14	-0.498986	4.81234e-14
KRT10	-0.499187	1.31016e-10
EIF2A	-0.500721	3.92369e-10
B4GALT1	-0.501702	0.00467937
SDCBP	-0.503753	0.00875695
POMP	-0.504205	8.58831e-09
PLSCR1	-0.504321	2.29306e-08
AC239799.2	-0.50477	5.34951e-06
LITAF	-0.507723	2.44489e-07
EIF1AX	-0.508552	6.41643e-08
VMP1	-0.51054	9.02461e-06
CYCS	-0.512003	4.96859e-09
SF3B5	-0.514032	4.2658e-08
UQCRH	-0.516147	4.48429e-05
SYAP1	-0.51677	1.50376e-07
TMA7	-0.517563	8.71057e-10
SLCO4A1	-0.523165	0.00119369
SMDT1	-0.523574	9.29303e-11
SLC25A6	-0.523752	5.71755e-08
POLR1E	-0.524215	4.93176e-11
CXCL8	-0.526121	2.81495e-14
PRDM1	-0.527857	0.0209884
RPS27A	-0.529344	2.51415e-09
METRNL	-0.531113	6.64207e-12
LAPTM4A	-0.532937	2.30024e-13
RPL13A	-0.532982	0.000148485
SPINK2	-0.533078	3.8739e-36
HLA-A	-0.534455	5.39365e-05
TRAM1	-0.535606	1.5242e-13
UFM1	-0.536144	7.94143e-11
ISG20	-0.536758	0.00332236
NPM1	-0.537515	3.71295e-07
SUB1	-0.537734	5.47903e-06
KDM6B	-0.538277	0.000783531
PHACTR1	-0.538841	0.0017141
DDT	-0.539768	4.39189e-14
NINJ1	-0.54013	5.22847e-11
NAP1L1	-0.547733	2.32491e-10
RPL5	-0.54972	1.43227e-07
ELOB	-0.550641	0.00166786
ITM2B	-0.550956	1.05757e-14
ID2	-0.551042	2.59841e-05
CCPG1	-0.552713	2.43912e-09
TIMP1	-0.555291	6.00007e-19
DDX21	-0.557057	2.04702e-08
PDIA6	-0.55986	1.22165e-10
CD55	-0.560542	3.5845e-07
RPL22	-0.562521	1.04932e-09
NDUFB1	-0.570316	5.07739e-11
RPL35A	-0.572289	2.80623e-13
COX17	-0.575357	6.34831e-12
TIMP2	-0.576475	4.02912e-07
COX6C	-0.578289	4.98007e-08
PLIN2	-0.579758	1.50767e-06
COX8A	-0.581027	0.00162513
TMEM258	-0.582481	7.0128e-11
ATP6V0E1	-0.582845	7.13693e-09
ANKRD28	-0.586087	0.00126118
MANF	-0.587324	5.94621e-10
TMSB10	-0.588868	3.98581e-07
TBCA	-0.589142	3.76482e-15
ATP5F1E	-0.589963	2.80574e-06
TMBIM6	-0.59028	4.66548e-14
FAU	-0.590297	1.30513e-13
ALOX5AP	-0.596726	8.56675e-07
RPL9	-0.597316	3.87644e-09
TPT1	-0.598326	4.90488e-10
CAPG	-0.599846	1.39624e-06
UQCRB	-0.602826	1.21214e-09
ARPC3	-0.604411	1.90317e-09
NOP10	-0.60888	3.50706e-09
SEC11C	-0.610704	2.23512e-08
SEC62	-0.61182	6.78324e-10
ARF4	-0.613771	3.40061e-13
TPSAB1	-0.615077	0.00341023
DBI	-0.615972	6.84432e-07
TXN	-0.616616	2.69946e-10
TOMM5	-0.622409	2.70265e-16
RPL21	-0.627044	2.89458e-10
GABARAP	-0.628913	8.65464e-07
RPS27	-0.630439	2.94242e-10
UBA52	-0.63354	3.25087e-08
SERPINB1	-0.642267	2.6216e-06
CTSL	-0.642335	2.09452e-07
TYMP	-0.646442	1.33396e-07
CD63	-0.655131	7.99116e-10
COBLL1	-0.656619	3.23752e-09
PDIA3	-0.658118	9.71009e-12
AP2S1	-0.659957	0.018699
HSP90B1	-0.663992	7.15112e-05
ISG15	-0.666676	0.000424526
GADD45B	-0.66727	0.00178946
SLAMF1	-0.667397	1.26729e-05
OST4	-0.668929	1.25593e-14
RPS21	-0.66912	4.39052e-12
RPL36A	-0.67254	2.89262e-11
G0S2	-0.673445	0.0207621
SEC61B	-0.677629	9.97419e-18
RPS27L	-0.679306	5.58002e-15
CCNH	-0.680323	1.12972e-10
ETS2	-0.683015	0.000636846
MAP1LC3B	-0.683122	1.43355e-08
SPCS2	-0.684904	6.65968e-16
CCL4	-0.687817	0.000321724
CALR	-0.688421	2.70875e-10
UBL5	-0.69144	5.23986e-18
WARS	-0.695184	1.54252e-05
H2AFY	-0.697736	1.92132e-07
BRI3	-0.703277	0.000174985
MT-CO2	-0.707502	1.66904e-11
DUSP1	-0.709157	2.13542e-07
ANXA5	-0.710799	1.18894e-08
H3F3B	-0.714939	1.37395e-07
TNFRSF18	-0.715988	6.72168e-24
H3F3A	-0.716535	1.70611e-10
YBX1	-0.719448	2.30844e-06
S100A8	-0.719648	5.93755e-10
EREG	-0.71977	1.15721e-05
AC026369.3	-0.72156	2.74981e-19
SELENOK	-0.724191	2.42967e-15
CCL20	-0.730341	2.53399e-11
RPL23A	-0.730856	1.16958e-10
RPS20	-0.739273	2.6784e-11
RPS28	-0.740803	2.58445e-17
CH25H	-0.743806	7.85217e-08
LMNA	-0.748146	4.42477e-08
ZFAND5	-0.750593	2.52506e-05
DNAJB9	-0.751676	6.60846e-20
AC007952.4	-0.754845	1.01334e-14
ATF5	-0.762129	5.38701e-10
RPL36AL	-0.762555	9.87999e-21
MT-ND4	-0.764619	6.55952e-08
RPL37	-0.765449	1.64314e-15
GPX4	-0.76597	1.13691e-05
IQCG	-0.768951	1.60469e-11
RPL37A	-0.77747	1.65627e-13
SRGN	-0.779904	4.71809e-16
S100A6	-0.781414	3.24794e-16
TPSB2	-0.784927	1.51241e-05
MT-ND5	-0.787663	1.51059e-09
MT-CO3	-0.790342	3.51545e-12
RPL7	-0.814137	2.03099e-12
HSPA5	-0.817417	1.98197e-15
RPL23	-0.823261	1.9943e-11
TNFAIP3	-0.825606	4.35059e-05
RPL34	-0.832526	4.65079e-22
HERPUD1	-0.835898	3.46686e-11
RPL38	-0.844877	2.23107e-15
RPS17	-0.851872	3.51076e-13
SKP1	-0.858645	2.1485e-21
EIF1	-0.862737	1.07008e-34
MT-ND1	-0.87086	7.04855e-11
IL1B	-0.878836	0.00128984
SELENOS	-0.883613	1.38653e-24
MT-CYB	-0.886098	4.14576e-15
FOSB	-0.89423	3.18284e-11
RPL39	-0.895476	2.18818e-26
FCER1G	-0.918588	0.000524688
RPS29	-0.92209	4.0403e-19
SOD2	-0.927599	1.46628e-06
CD68	-0.928363	2.48295e-05
RPS26	-0.936458	5.31703e-23
FOS	-0.939827	1.51639e-09
GLUL	-0.940857	2.47999e-06
S100A9	-0.952278	8.28955e-10
IFI6	-0.9601	4.36319e-08
KLF2	-0.961627	2.95671e-08
JMY	-0.961959	2.56494e-10
BIRC3	-0.970923	4.59055e-08
NAMPT	-0.974777	5.99987e-19
IGHA1	-0.998944	5.99664e-09
SEC61G	-1.00796	2.31933e-31
IGHG4	-1.04697	1.07177e-07
TMEM107	-1.05956	7.69687e-17
S100A4	-1.07636	1.84328e-12
IGLC3	-1.10059	1.04884e-05
RPS10	-1.11405	6.34659e-21
CEBPB	-1.12022	1.27577e-19
FTL	-1.13974	0.00112361
MT-ND2	-1.14834	1.20626e-18
THBS1	-1.1663	0.000192074
C15orf48	-1.2361	2.54137e-05
CCL3	-1.28154	0.00178003
MT1F	-1.32375	1.74523e-17
CEBPD	-1.3953	0.000388321
DUSP5	-1.45578	3.24471e-26
MT-ND3	-1.49928	6.28382e-33
RPL41	-1.51441	1.69975e-42
AREG	-1.57685	2.41034e-29
RRAD	-1.60204	2.22241e-15
FTH1	-1.86098	1.89632e-07
JCHAIN	-1.9013	2.98797e-37
MT1G	-2.34639	8.34266e-09
MT1X	-2.91285	1.09925e-33
MT1E	-3.14354	2.13359e-31
MT2A	-3.64834	1.86107e-46
Note: Avg_log2FC>0 genes overexpressed in IPF plasma cells; Avg_log2FC<0 genes overexpressed in control plasma cells.

## Sheet: table S10 qPCR primers
table S10 qPCR primers
Primer Name	Sequence
Hs_GAPDH_Forward	5’ AACGACCCCTTCATTGAC 3’
Hs_GAPDH_Reverse	5’ TCCACGACATACTCAGCAC 3’
Hs_CDKN2A_Forward	5’GAGCAGCATGGAGCCTTC 3’
Hs_CDKN2A_Reverse	5’ CGTAACTATTCGGTGCGTTG 3’
Hs_ACTA2_Forward	5’ GTGTTGCCCCTGAAGAGCAT 3’
Hs_ACTA2_Reverse	5’ GCTGGGACATTGAAAGTCTCA 3’
Hs_COL1A1_Forward	5’ CCCCGAGGCTCTGAAGGT 3’
Hs_COL1A1_Reverse	5’ ACCAGGTTCACCGCTGTTAC 3’
Hs_TGFB1_Forward	5’ TACCTGAACCCGTGTTGCTC 3’
Hs_TGFB1_Reverse	5’ CCGGTAGTGAACCCGTTGAT 3’
